# Supplementary material for: Efficient Dimerization Disruption of Leishmania infantum Trypanothione Reductase by Triazole-phenyl-thiazoles
Source: PubMed Central journal article supplement (PMC8480782; doi:10.1021/acs.jmedchem.1c00206), 2021-05-04
Supplement: jm1c00206_si_001.pdf [file jm1c00206_si_001.pdf]

## Supporting Information

### Efficient dimerization disruption of *Leishmania infantum* trypanothione reductase by triazole-phenyl-thiazoles

Alejandro Revuelto,<sup>†#</sup> Héctor de Lucio,<sup>##</sup> Juan Carlos García Soriano,<sup>‡</sup> Pedro A. Sánchez-Murcia,<sup>§⊥</sup> Federico Gago,<sup>§</sup> Antonio Jiménez-Ruiz,<sup>‡\*</sup> María-José Camarasa,<sup>†</sup> and Sonsoles Velázquez<sup>†\*</sup>

<sup>†</sup> *Instituto de Química Médica (IQM-CSIC), E-28006 Madrid, Spain*

<sup>‡</sup> *Departamento de Biología de Sistemas, Universidad de Alcalá, E-28805 Alcalá de Henares, Madrid, Spain*

<sup>§</sup> *Área de Farmacología, Departamento de Ciencias Biomédicas, Unidad Asociada al IQM-CSIC, Universidad de Alcalá, E-28805 Alcalá de Henares, Madrid, Spain*

<sup>#</sup> *These two authors contributed equally to this work*

<sup>⊥</sup> **Present address:** *Asst. Prof. Dr. Pedro A. Sánchez Murcia, Division of Physiological Chemistry, Otto Loewi Research Center, Medical University of Graz, Neue Stiftingstalstraße 6/III, A-8010 Graz, Austria (pedro.murcia@medunigraz.at)*

## Table of contents

### Chemistry

|                                                                                                 |         |
|-------------------------------------------------------------------------------------------------|---------|
| <b>Schemes S1-S3</b> .....                                                                      | S4-S6   |
| Synthesis of non-commercially available $\alpha$ -bromomethylketones <b>10m,p-s</b> .....       | S7-S10  |
| Synthesis of intermediates <b>5b, 7a-g, 8a-g, 11f-s</b> and target compounds <b>12d-s</b> ..... | S11-S41 |
| Synthesis of truncated analogues <b>13</b> and <b>14</b> .....                                  | S41-S42 |

### Biology Methods

|                                                                                                                                                         |         |
|---------------------------------------------------------------------------------------------------------------------------------------------------------|---------|
| <b>Figure S1</b> and <b>Table S1</b> . Noncompetitive hyperbolic inhibition of <i>L</i> TryR by <b>19a</b> .....                                        | S43     |
| <b>Figures S2-S7</b> . Observed rate constant ( $k_{obs}$ ) for <i>L</i> TryR inactivation at 6 different $TS_2$ concentrations .....                   | S44-S48 |
| <b>Table S2</b> . Rate constants for <i>L</i> TryR time-dependent inhibition by <b>19a</b> at six different $TS_2$ concentrations (Table S2).....       | S49     |
| <b>Figure S8</b> . Effect of substrate concentration on the apparent inhibition constants $K_i^{app}$ and $K_i^{*app}$ upon binding of <b>19a</b> ..... | S49     |
| <b>Figure S9</b> . Plot of the $k_{obs}$ values as a function of $TS_2$ concentration at six different <b>19a</b> concentrations .....                  | S50     |
| <b>Figure S10</b> . Curves for <i>L</i> TryR enzymatic reactions in the absence of inhibitor.....                                                       | S51     |
| <b>Figure S11</b> . <i>L</i> TryR inhibition by <b>12b</b> .....                                                                                        | S52     |
| <b>Table S3</b> . Estimation of the kinetic parameters of <i>L</i> TryR inactivation by <b>12b</b> .....                                                | S53     |
| <b>Figure S12</b> . <i>L</i> TryR inhibition by <b>12q</b> .....                                                                                        | S54     |
| <b>Table S4</b> . Estimation of the kinetic parameters of <i>L</i> TryR inhibition by <b>12q</b> .....                                                  | S54     |
| <b>Scheme S4</b> . Reversible single-step mechanism of time-dependent inhibition of <i>L</i> TryR by <b>12q</b> .....                                   | S55     |
| <b>Figure S13</b> . Residual activity of <i>L</i> TryR after incubation with <b>19a</b> .....                                                           | S55     |
| <b>Scheme S5</b> . Global mechanism for <i>L</i> TryR inactivation .....                                                                                | S56     |
| <b>Figures S14</b> and <b>S15</b> . Screening of representative compounds for PAINS .....                                                               | S57     |

## Computational Methods

|                                                                                                                                                   |          |
|---------------------------------------------------------------------------------------------------------------------------------------------------|----------|
| <b>Figure S16.</b> Calculated contributions of individual <i>L</i> /TryR residues to the overall solvent-corrected interaction energy .....       | S58      |
| <b>Figure S17A.</b> Theoretical model of <i>L</i> /TryR in complex with <b>19a</b> .....                                                          | S59-S60  |
| <b>Figure S17B.</b> <b>19a</b> -induced disruptions in hydrogen bonds involving the Glu436 carboxylates OE1 and OE2 .....                         | S59-S60  |
| <b>Table S5.</b> Residues making up the interfacial cavity present in TryRs from trypanosomatids and positionally equivalent residues in hGR..... | S60      |
| <sup>1</sup> H and <sup>13</sup> C NMR spectra, HRMS and HPLC data of target compounds.....                                                       | S61-S115 |
| References.....                                                                                                                                   | S116     |

**Scheme S1. Synthesis of non-commercially available  $\alpha$ -bromomethylketones 10m,p-s**

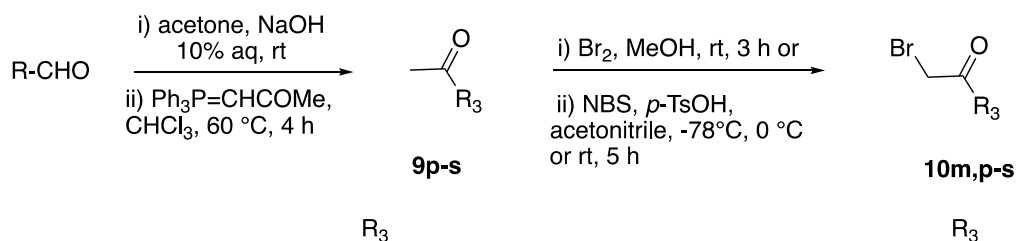

**p** (E)-CH=CH-CH<sub>2</sub>Ph (**pa**) and (E)-CH<sub>2</sub>-CH=CH-Ph (**pb**)  
**q** (E)-CH=CH-Quinolin-6-yl  
**r** (E)-CH=CH-Dihydrobenzofuran-2-yl  
**s** (E)-CH=CH-Dibenzofuran-2-yl

**m** -CH<sub>2</sub><sup>t</sup>Bu  
**p** (E)-CH=CH-CH<sub>2</sub>Ph  
**q** (E)-CH=CH-Quinolin-6-yl \* not isolated  
**r** (E)-CH=CH-Dihydrobenzofuran-2-yl  
**s** (E)-CH=CH-Dibenzofuran-2-yl

**Scheme S2. Synthesis of triazole-based type I compounds 12d-s**

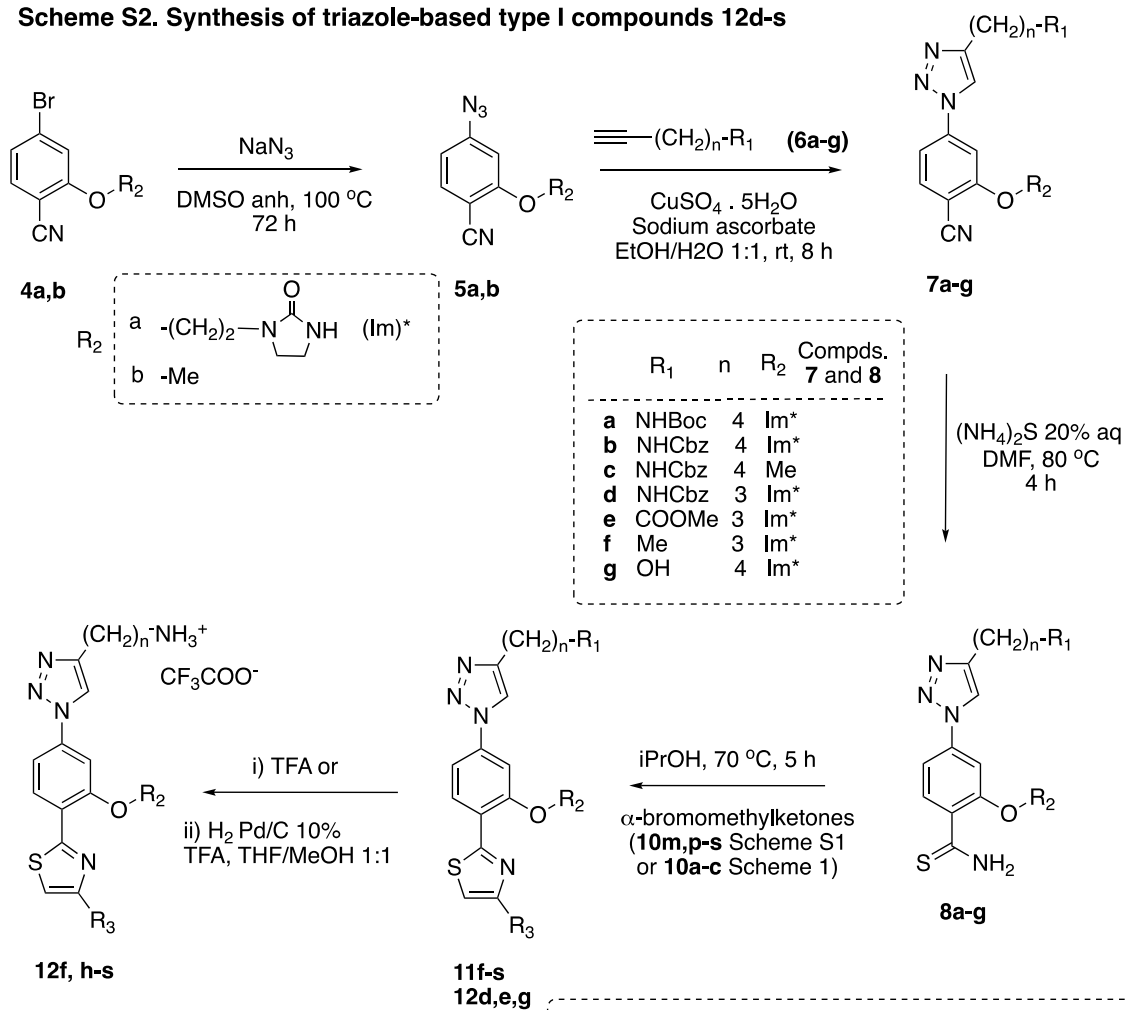

| n | R <sub>2</sub> | R <sub>3</sub> | Compds. 12                                                |
|---|----------------|----------------|-----------------------------------------------------------|
| f | 3              | Im*            | $-(\text{CH}_2)_2\text{Biphenyl}$ R <sub>1</sub> = Me     |
| h | 3              | Im*            | $-(\text{CH}_2)_2\text{Ph}$                               |
| i | 3              | Im*            | $-(\text{CH}_2)_2\text{Biphenyl}$                         |
| j | 4              | Me             | $-(\text{CH}_2)_2\text{Ph}$                               |
| k | 4              | Me             | $-(\text{CH}_2)_2\text{Biphenyl}$                         |
| l | 4              | Im*            | $-\text{O}^i\text{Pr}$                                    |
| m | 4              | Im*            | $-\text{CH}_2^t\text{Bu}$                                 |
| n | 4              | Im*            | $-\text{Ph}$                                              |
| o | 4              | Im*            | $-\text{CH}_2\text{Ph}$                                   |
| p | 4              | Im*            | $-(\text{CH}_2)_3\text{Ph}$                               |
| q | 4              | Im*            | $-(\text{CH}_2)_2\text{-1,2,3,4-Tetrahydroquinolin-6-yl}$ |
| r | 4              | Im*            | $-(\text{CH}_2)_2\text{-Dihydrobenzofuran-2-yl}$          |
| s | 4              | Im*            | $-(\text{CH}_2)_2\text{-Dibenzofuran-2-yl}$               |

  

| R <sub>1</sub> | n     | R <sub>2</sub> | R <sub>3</sub> | Compds. 11                                 |
|----------------|-------|----------------|----------------|--------------------------------------------|
| f              | Me    | 3              | Im*            | $-(E)\text{-CH=CH-Biphenyl}$               |
| g              | COOMe | 3              | Im*            | $-(\text{CH}_2)_2\text{Ph}$                |
| h              | NHCbz | 3              | Im*            | $-(\text{CH}_2)_2\text{Ph}$                |
| i              | NHCbz | 3              | Im*            | $-(E)\text{-CH=CH-Biphenyl}$               |
| j              | NHCbz | 4              | Me             | $-(\text{CH}_2)_2\text{Ph}$                |
| k              | NHCbz | 4              | Me             | $-(\text{CH}_2)_2\text{Biphenyl}$          |
| l              | NHBoc | 4              | Im*            | $-\text{O}^i\text{Pr}$                     |
| m              | NHBoc | 4              | Im*            | $-\text{CH}_2^t\text{Bu}$                  |
| n              | NHCbz | 4              | Im*            | $-\text{Ph}$                               |
| o              | NHBoc | 4              | Im*            | $-\text{CH}_2\text{Ph}$                    |
| p              | NHCbz | 4              | Im*            | $-(E)\text{-CH=CH-CH}_2\text{Ph}$          |
| q              | NHCbz | 4              | Im*            | $-(E)\text{-CH=CH-Quinolin-6-yl}$          |
| r              | NHCbz | 4              | Im*            | $-(E)\text{-CH=CH-Dihydrobenzofuran-2-yl}$ |
| s              | NHCbz | 4              | Im*            | $-(E)\text{-CH=CH-Dibenzofuran-2-yl}$      |
| d              | OH    | 4              | Im*            | $-(\text{CH}_2)_2\text{Ph}$                |
| e              | Me    | 3              | Im*            | $-(\text{CH}_2)_2\text{Ph}$                |
| g              | COOH  | 3              | Im*            | $-(\text{CH}_2)_2\text{Ph}$                |

Compds. 12

**Scheme S3. Synthesis of truncated analogues 13 and 14**

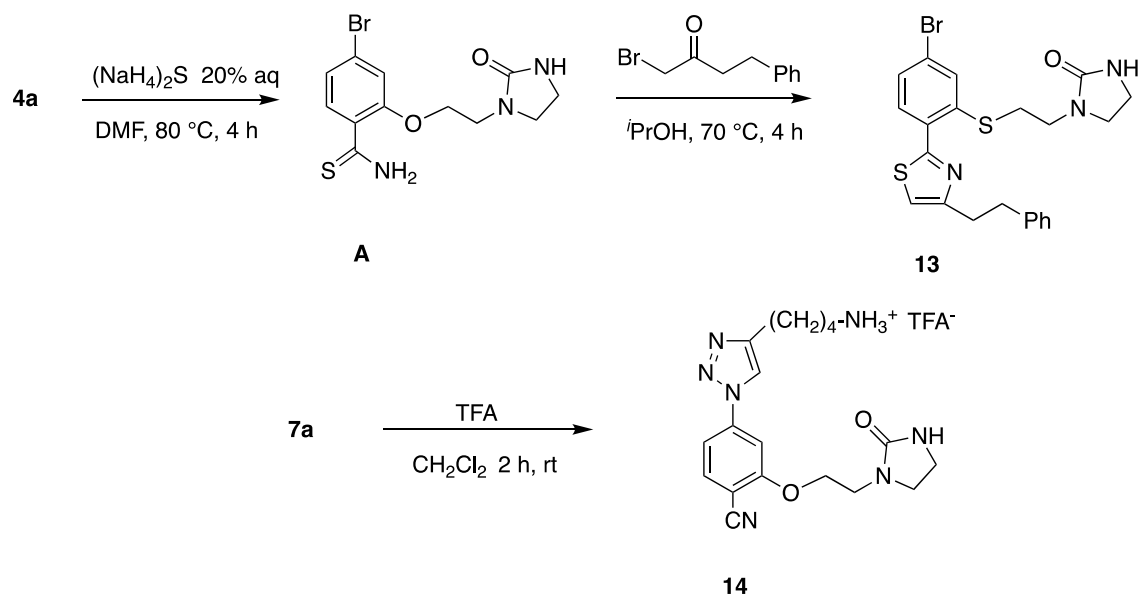

## Synthesis of non-commercially available $\alpha$ -bromomethylketones

### **General procedure for the synthesis of methylketones by Wittig reaction (9p-s).**

A solution of the corresponding arylaldehyde or alkylaldehyde (1 eq) and 1-(triphenylphosphoranylidene)-2-propanone (0.9 eq) in chloroform (40 mL) was heated at 60 °C for 4 h. The reaction mixture was evaporated under reduced pressure and the residue was purified by flash column chromatography (hexane/EtOAc, 90:10) to obtain the corresponding  $\alpha,\beta$ -unsaturated methylketones **9p-s**.

### **(E)-5-Phenylpent-3-en-2-one and (E)-5-phenylpent-4-en-2-one (9pa and 9pb).**

Following the general Wittig procedure, commercial 1-(triphenylphosphoranylidene)-2-propanone (2.87 g, 9.02 mmol) and phenylacetaldehyde (1.17 mL, 9.02 mmol) were reacted. Work-up and purification of the residue gave 1.24 g (86%) of a 75:25 regioisomer mixture of **9pa** and **9pb** (determined by  $^1\text{H}$  NMR).  $^1\text{H}$  NMR ( $\text{CDCl}_3$ , 400 MHz)  $\delta$  (ppm): 7.41 - 7.01 (m, 7H,  $\text{Ar}^{a,b}$ ), 7.00 (dt,  $J = 15.9, 1.5$  Hz, 0.3H,  $\text{PhCH}^b=\text{CH}$ ), 6.85 (dt,  $J = 15.9, 7.1$  Hz, 0.3H,  $\text{PhCH}=\text{CH}^b$ ), 6.83 (dt,  $J = 15.9, 6.8$  Hz, 1H,  $\text{CH}^a=\text{CHCO}$ ), 6.00 (dt,  $J = 15.9, 1.6$  Hz, 1H,  $\text{CH}=\text{CH}^a\text{CO}$ ), 3.46 (dd,  $J = 6.8, 1.6$  Hz, 2H,  $\text{CH}_2^a$ ), 3.25 (dd,  $J = 7.1, 1.3$  Hz, 0.5H,  $\text{CH}_2^b$ ), 2.16 (s, 3H,  $\text{CH}_3^a$ ), 2.13 (s, 0.7H,  $\text{CH}_3^b$ ).

**(E)-4-(quinolin-6-yl)but-3-en-2-one (9q).** Following the general procedure, 1-(triphenylphosphoranylidene)-2-propanone (563 mg, 1.77 mmol) and quinoline-6-carbaldehyde (250 mg, 1.59 mmol) were reacted for 6 h. Purification of the residue by flash column chromatography (hexane/AcOEt, 50:50) gave 1.70 g of an unsolvable mixture of the starting ylide and the desired product **9q**. The mixture was used in the next step without further purification.

**(E)-4-(2,3-Dihydrobenzofuran-5-yl)but-3-en-2-one (9r).** According to the general procedure of the aldol condensation described in the experimental section and similarly to naphthyl and biphenyl methylketones, 2,3-dihydrobenzofuran-5-carbaldehyde (1 g, 6.73 mmol), acetone (4.98 mL, 67.3 mmol) and NaOH 10% aq (27 mL, 67.3 mmol) were

reacted. After working up, crude was purified by flash column chromatography (hexane/AcOEt, 80:20) to provide 811 mg (64%) of a white solid identified as **(9r)**. M.p.: 105-106 °C; <sup>1</sup>H NMR (CDCl<sub>3</sub>, 400 MHz) δ (ppm): 7.36 (d, *J* = 16.2 Hz, 1H, CH=CHCO), 7.31 (s, 1H, Ar), 7.20 (dd, *J* = 8.2, 1.9 Hz, 1H, Ar), 6.68 (d, *J* = 8.6 Hz, 1H, Ar), 6.47 (d, *J* = 16.2 Hz, 1H, CH=CHCO), 4.51 (t, *J* = 8.7 Hz, 2H, OCH<sub>2</sub>), 3.12 (t, *J* = 8.7 Hz, 2H, OCH<sub>2</sub>CH<sub>2</sub>), 2.24 (s, 3H, CH<sub>3</sub>).

**(E)-4-(Dibenzo[*b,d*]furan-2-yl)but-3-en-2-one (9s)**. Following the general procedure, 1-(triphenylphosphoranylidene)-2-propanone (1.06 g, 3.31 mmol) and dibenzofuran-2-carboxaldehyde (500 mg, 2.55 mmol) were reacted to give **9s** (1.09 g, 90%) as a white solid. M.p.: 141-142 °C; <sup>1</sup>H NMR (CDCl<sub>3</sub>, 400 MHz) δ (ppm): 7.93 (d, *J* = 1.9 Hz, 1H, Ar), 7.80 (d, *J* = 8.5 Hz, 1H, Ar), 7.57 - 7.32 (m, 5H, Ar, CH=CHCO), 7.25 (td, *J* = 7.5, 2.1 Hz, 1H, Ar), 6.64 (d, *J* = 16.2 Hz, 1H, CH=CHCO), 2.29 (s, 3H, CH<sub>3</sub>).

**1-bromo-4,4-dimethylpentan-2-one (10m)**. To a stirred solution of commercially available 4,4-dimethylpentan-2-one (1 g, 8.75 mmol) in MeOH (20 mL) was added dropwise Br<sub>2</sub> (0.45 mL, 8.75 mmol) at 0 °C. Then, the reaction mixture was allowed to warm to room temperature and stirred under reflux for 3 h. After quenching with water (20 mL), the aqueous phase was extracted with Et<sub>2</sub>O (3 x 30 mL). The combined organics were dried (Na<sub>2</sub>SO<sub>4</sub>), filtered and carefully concentrated to give **10m** (1.69 g, >99%) as a colorless oil. <sup>1</sup>H NMR (CDCl<sub>3</sub>, 400 MHz) δ (ppm): 3.86 (s, 2H, CH<sub>2</sub>Br), 2.52 (s, CH<sub>2</sub>-<sup>t</sup>Bu), 1.03 (s, 9H, CH<sub>3</sub>).

**General procedure for the preparation of α-bromoketones through bromination with NBS (10p-s)**. To a solution of the corresponding methylketone (1 eq) in CH<sub>3</sub>CN or THF, *p*-TsOH (1.3 eq) and NBS (1.3 eq) were successively added at -78 °C or at room temperature and the mixture was stirred for 6 h/overnight. After quenching with H<sub>2</sub>O (30 mL) the reaction mixture was carefully concentrated under reduced pressure without heating. The aqueous crude was extracted with EtOAc (3 x 30 mL), dried (Na<sub>2</sub>SO<sub>4</sub>),



filtered and evaporated to dryness. The residue was purified by flash column chromatography or by CCTLC to give the desired  $\alpha$ -bromoketones **10b,c** and **10p-s**.

**(E)-1-bromo-5-phenylpent-3-en-2-one (10p)**. Following the general procedure, *p*-TsOH (890 mg, 4.68 mmol), NBS (833 mg, 4.68 mmol) and the methylketone mixture (**9pa** and **9pb**) (500 mg, 3.12 mmol) were reacted. After the work-up and purification **10p** (130 mg, 17%) was obtained as a colorless oil.  $^1\text{H}$  NMR ( $\text{CDCl}_3$ , 400 MHz)  $\delta$  (ppm): 7.37 - 7.31 (m, 2H, Ar), 7.29 - 7.23 (m, 1H, Ar), 7.20 - 7.16 (m, 2H, Ar), 7.12 (dt,  $J = 15.7, 6.8$  Hz, 1H,  $\text{CH}=\text{CHCO}$ ), 6.28 (dt,  $J = 15.8, 1.6$  Hz, 1H,  $\text{CH}=\text{CHCO}$ ), 3.98 (s, 2H,  $\text{CH}_2\text{Br}$ ), 3.59 (dd,  $J = 7.0, 1.7$  Hz, 2H,  $\text{PhCH}_2$ );  $^{13}\text{C}$  NMR ( $\text{CDCl}_3$ , 75 MHz)  $\delta$  (ppm): 191.1 (CO), 148.7 ( $\text{CH}_2\text{CH}=\text{CH}$ ), 137.3 ( $\text{C}_{\text{Ar}}$ ), 129.0 ( $\text{CH}_{\text{Ar}}$ ), 127.4 ( $\text{CH}_{\text{Ar}}$ ), 127.1 ( $\text{CH}_2\text{CH}=\text{CH}$ ), 39.0 ( $\text{Ar-CH}_2$ ), 32.7 ( $\text{CH}_2\text{Br}$ ).

**(E)-1-bromo-4-(quinolin-6-yl)but-3-en-2-one (10q)**. Following the general bromination procedure, **9q** (1.59 mmol), *p*-TsOH (454 mg, 2.39 mmol) and NBS (425 mg, 2.39 mmol) were reacted. To give after the work-up compound **10q** that was not isolated due to stability problems and it was used directly in the next step without further purification.

**(E)-1-bromo-4-(2,3-dihydrobenzofuran-5-yl)but-3-en-2-one (10r)**. Following the general procedure, *p*-TsOH (380 mg, 2.00 mmol) and NBS (355 mg, 2.00 mmol) were successively added to a solution of methylketone **9r** (250 mg, 1.33 mmol) and allowed to react for 6 h. Work-up and purification gave **10r** (107 mg, 30%) as a white solid. M.p.: Decompose without melting;  $^1\text{H}$  NMR ( $\text{CDCl}_3$ , 400 MHz)  $\delta$  (ppm): 7.65 (d,  $J = 15.9$  Hz, 1H,  $\text{CH}=\text{CHCO}$ ), 7.46 (d,  $J = 2.0$  Hz, 1H, Ar), 7.36 (dd,  $J = 8.3, 1.9$  Hz, 1H, Ar), 6.80 (d,  $J = 8.2$  Hz, 1H, Ar), 6.64 (d,  $J = 15.9$  Hz, 1H,  $\text{CH}=\text{CHCO}$ ), 4.64 (t,  $J = 8.7$  Hz, 2H,  $\text{OCH}_2$ ), 4.05 (s, 2H,  $\text{CH}_2\text{Br}$ ), 3.24 (t,  $J = 8.7$  Hz, 2H,  $\text{OCH}_2\text{CH}_2$ );  $^{13}\text{C}$  NMR ( $\text{CDCl}_3$ , 75 MHz)  $\delta$  (ppm): 191.1 (CO), 163.2 ( $\text{OC}_{\text{Ar}}$ ), 145.8 ( $\text{ArCH}=\text{CH}$ ), 130.7 ( $\text{CH}_{\text{Ar}}$ ), 128.5 ( $\text{C}_{\text{Ar}}$ ), 126.9 ( $\text{C}_{\text{Ar}}$ ), 125.2

(ArCH=CH), 119.3 (CH<sub>Ar</sub>), 110.0 (CH<sub>Ar</sub>), 72.2 (OCH<sub>2</sub>), 33.3 (CH<sub>2</sub>Br), 29.3 (OCH<sub>2</sub>CH<sub>2</sub>); MS (ESI, positive mode) m/z: 289.0 [M+Na]<sup>+</sup>, 267.0 [M+H]<sup>+</sup>, both with a Br isotopic pattern.

**(E)-1-bromo-4-(dibenzo[b,d]furan-2-yl)but-3-en-2-one (10s)**. Following the general procedure, methylketone **9s** (200 mg, 0.85 mmol), *p*-TsOH (161 mg, 0.85 mmol) and NBS (151 mg, 0.85 mmol) were reacted. Work-up and purification of the residue by CCTLC on the Chromatotron (hexane/EtOAc, 93:7) gave **10s** (75 mg, 28%) as a white solid. M.p.: 143-145 °C; <sup>1</sup>H NMR (CDCl<sub>3</sub>, 400 MHz) δ (ppm): 8.17 (d, *J* = 1.8 Hz, 1H, Ar), 7.98 (dd, *J* = 7.7, 1.4 Hz, 1H, Ar), 7.87 (d, *J* = 16.0 Hz, 1H, CH=CHCO), 7.70 (dd, *J* = 8.5, 1.8 Hz, 1H, Ar), 7.62 - 7.57 (m, 2H, Ar), 7.51 (td, *J* = 8.0, 1.3 Hz, 1H, Ar), 7.39 (td, *J* = 7.6, 1.0 Hz, 1H, Ar), 7.02 (d, *J* = 16.0 Hz, 1H, CH=CHCO), 4.12 (s, 2H, CH<sub>2</sub>Br); <sup>13</sup>C NMR (CDCl<sub>3</sub>, 100 MHz) δ (ppm): 191.0 (CO), 158.0 (OC<sub>Ar</sub>), 156.9 (OC<sub>Ar</sub>), 145.7 (ArCH=CH), 143.3 (CH<sub>Ar</sub>), 129.1 (C<sub>Ar</sub>), 128.1 (CH<sub>Ar</sub>), 128.0 (ArCH=CH), 125.1 (C<sub>Ar</sub>), 123.6 (C<sub>Ar</sub>), 123.4 (CH<sub>Ar</sub>), 121.4 (CH<sub>Ar</sub>), 121.0 (CH<sub>Ar</sub>), 112.5 (CH<sub>Ar</sub>), 112.1 (CH<sub>Ar</sub>), 33.3 (CH<sub>2</sub>Br); MS (ESI, positive mode) m/z: 329.0 [M+Na]<sup>+</sup> with a Br isotopic pattern.

## Synthesis of intermediates and target compounds 12d-s

**4-Azido-2-methoxybenzonitrile (5b).** A solution of **4b**<sup>1</sup> (500 mg, 2.36 mmol) and NaN<sub>3</sub> (2.30 g, 35.4 mmol) in anhydrous DMSO (30 mL) in the presence of 4 Å molecular sieves, and under argon atmosphere, was heated at 100 °C for 72 h. After a similar work-up as described for **5b**, the residue was purified by flash column chromatography (CH<sub>2</sub>Cl<sub>2</sub>/MeOH, 100:2) to give **5b** (304 mg, 74%) as a white solid. M.p.: 118-120 °C; <sup>1</sup>H NMR (CDCl<sub>3</sub>, 400 MHz) δ (ppm): 7.53 (d, *J* = 8.3 Hz, 1H, Ar), 6.69 (dd, *J* = 8.3, 2.0 Hz, 1H, Ar), 6.54 (d, *J* = 2.0 Hz, 1H, Ar), 3.92 (s, 3H, OCH<sub>3</sub>); <sup>13</sup>C NMR (CDCl<sub>3</sub>, 75 MHz) δ (ppm): 162.7 (OC<sub>Ar</sub>), 146.7 (C<sub>Ar</sub>), 135.1 (CH<sub>Ar</sub>), 116.2 (CN), 111.4 (CH<sub>Ar</sub>), 102.6 (CH<sub>Ar</sub>), 98.3 (C<sub>Ar</sub>), 56.4 (OCH<sub>3</sub>); MS (ESI, positive mode) *m/z*: 197.0 [M+Na]<sup>+</sup>, 175.0 [M+H]<sup>+</sup>. NaN<sub>3</sub> may be toxic and explosive. Thus, for safety precautions a polycarbonate safety screen in a properly functioning fume hood was always used to perform this reaction.

**General procedure for the synthesis of 1,2,3-triazoles by copper-catalyzed 1,3-dipolar azide-alkyne cycloaddition (CuAAC) (7a-g).** A solution of the azide intermediates **5a,b** (1 eq) in EtOH was treated with the corresponding terminal alkynes **6a-g** (1.2 eq) and CuSO<sub>4</sub>·5H<sub>2</sub>O (0.1 eq). Sodium ascorbate (0.40 eq) and H<sub>2</sub>O were subsequently added and the reaction mixture was stirred at room temperature overnight in the darkness. Then, it was evaporated to dryness and the residue was dissolved in CH<sub>2</sub>Cl<sub>2</sub> (50 mL) and washed with H<sub>2</sub>O (3 x 50 mL) dried (Na<sub>2</sub>SO<sub>4</sub>) filtered and evaporated under reduced pressure. The residue was purified by flash column chromatography (eluent is specified in each case).

**Tert-butyl-(4-(1-(4-cyano-3-(2-(2-oxoimidazolidin-1-yl)ethoxy)phenyl)-1H-1,2,3-triazol-4-yl)butyl)carbamate (7a).** Following the general procedure, azide **5a** (250 mg, 0.92 mmol) reacted with commercially available *tert*-butyl-5-hexynylcarbamate (**6a**, 248 mg, 1.19 mmol). After the work-up the residue was purified by flash column chromatography (CH<sub>2</sub>Cl<sub>2</sub>/MeOH, 100:2) to give **7a** (242 mg, 56%) as a colorless oil. <sup>1</sup>H

NMR (CDCl<sub>3</sub>, 300 MHz)  $\delta$  (ppm): 7.93 (s, 1H, Ar), 7.68 (dd,  $J$  = 8.4, 2.4 Hz, 1H, Ar), 7.57 (s, 1H, Ar), 7.39 (d,  $J$  = 7.7 Hz, 1H, Ar), 4.78 (br s, 1H, NHCON), 4.69 (br s, 1H, NHBoc), 4.35 - 4.31 (m, 2H, OCH<sub>2</sub>), 3.75 (t,  $J$  = 7.1 Hz, 2H, CH<sub>2</sub>CH<sub>2</sub>NHCON), 3.67 - 3.62 (m, 2H, OCH<sub>2</sub>CH<sub>2</sub>), 3.45 (t,  $J$  = 7.4 Hz, 2H, CH<sub>2</sub>CH<sub>2</sub>NHCON), 3.15 (q,  $J$  = 6.0 Hz, 2H, CH<sub>2</sub>NHBoc), 2.82 (t,  $J$  = 6.6 Hz, 2H, TrizCH<sub>2</sub>), 1.76 (quin,  $J$  = 7.7 Hz, 2H, TrizCH<sub>2</sub>CH<sub>2</sub>), 1.57 (quin,  $J$  = 7.5 Hz, 2H, CH<sub>2</sub>CH<sub>2</sub>NHBoc), 1.42 (s, 9H, CH<sub>3</sub>); <sup>13</sup>C NMR (CDCl<sub>3</sub>, 75 MHz)  $\delta$  (ppm): 162.8 (NHCON), 161.5 (OC<sub>Ar</sub>), 156.2 (NHCOO), 149.3 (C<sub>Ar</sub>), 141.6 (C<sub>Ar</sub>), 135.1 (CH<sub>Ar</sub>), 119.1 (CH<sub>Ar</sub>), 115.7 (CN), 112.1 (CH<sub>Ar</sub>), 104.1 (CH<sub>Ar</sub>), 101.6 (C<sub>Ar</sub>), 79.3 (OC(CH<sub>3</sub>)<sub>3</sub>), 69.2 (OCH<sub>2</sub>), 47.4 (CH<sub>2</sub>CH<sub>2</sub>NHCON), 43.0 (OCH<sub>2</sub>CH<sub>2</sub>), 40.3 (CH<sub>2</sub>NHBoc), 38.6 (CH<sub>2</sub>CH<sub>2</sub>NHCON), 29.5 (CH<sub>2</sub>CH<sub>2</sub>NHBoc), 28.5 (CH<sub>3</sub>), 26.3 (TrizCH<sub>2</sub>CH<sub>2</sub>), 25.2 (TrizCH<sub>2</sub>); MS (ESI, positive mode)  $m/z$ : 492.3 [M+Na]<sup>+</sup>, 470.3 [M+H]<sup>+</sup>.

***Benzyl-(4-(1-(4-cyano-3-methoxyphenyl)-1H-1,2,3-triazol-4-yl)butyl)carbamate (7c).***

Following the general procedure azide **5b** (590 mg, 2.71 mmol) was reacted with benzyl 5-hexynylcarbamate (858 mg, 3.52 mmol), CuSO<sub>4</sub>·5H<sub>2</sub>O (68 mg, 0.27 mmol) and sodium ascorbate (215 mg, 1.08 mmol). After the work-up the residue was purified by flash column chromatography (First: hexane/EtOAc, 80:20; Second: CH<sub>2</sub>Cl<sub>2</sub>/MeOH, 100:2) to give **7c** (963 mg, 88%) as a yellow oil. <sup>1</sup>H NMR (CDCl<sub>3</sub>, 400 MHz)  $\delta$  (ppm): 7.79 (s, 1H, Ar), 7.60 (d,  $J$  = 8.3 Hz, 1H, Ar), 7.49 (d,  $J$  = 1.9 Hz, 1H, Ar), 7.31 - 7.14 (m, 6H, Ar), 5.02 (s, 2H, NHCOOCH<sub>2</sub>), 4.90 (t,  $J$  = 6.2 Hz, 1H, NHCbz), 3.95 (s, 3H, OCH<sub>3</sub>), 3.17 (q,  $J$  = 6.7 Hz, 2H, CH<sub>2</sub>NHCbz), 2.76 (t,  $J$  = 7.5 Hz, 2H, TrizCH<sub>2</sub>), 1.71 (quin,  $J$  = 7.5 Hz, 2H, TrizCH<sub>2</sub>CH<sub>2</sub>), 1.55 (quin,  $J$  = 7.2 Hz, 2H, CH<sub>2</sub>CH<sub>2</sub>NHCbz); <sup>13</sup>C NMR (CDCl<sub>3</sub>, 100 MHz)  $\delta$  (ppm): 162.5 (OC<sub>Ar</sub>), 156.6 (NHCOO), 149.2 (C<sub>Ar</sub>), 141.5 (C<sub>Ar</sub>), 136.6 (C<sub>Ar</sub>), 135.1 (CH<sub>Ar</sub>), 128.6 (CH<sub>Ar</sub>), 128.2 (CH<sub>Ar</sub>), 128.1 (CH<sub>Ar</sub>), 119.1 (CH<sub>Ar</sub>), 115.6 (CN), 111.5 (CH<sub>Ar</sub>), 103.6 (CH<sub>Ar</sub>), 101.6 (C<sub>Ar</sub>), 66.7 (NHCOOCH<sub>2</sub>), 56.7 (OCH<sub>3</sub>), 40.7 (CH<sub>2</sub>NHCbz), 29.5 (CH<sub>2</sub>CH<sub>2</sub>NHCbz), 26.3 (TrizCH<sub>2</sub>CH<sub>2</sub>), 25.4 (TrizCH<sub>2</sub>); HRMS (ES, positive mode)  $m/z$ : calculated for C<sub>22</sub>H<sub>23</sub>N<sub>5</sub>O<sub>3</sub> 405.1801; Found 405.1794 (1.8 ppm).

**Benzyl (3-(1-(4-cyano-3-((1-(2-oxoimidazolidin-1-yl)ethoxy)phenyl)-1H-1,2,3-triazol-4-yl)propyl)carbamate (7d).** According to the general procedure, azide **5a** (600 mg, 2.20 mmol), benzyl 4-pentynylcarbamate (622 mg, 2.86 mmol), CuSO<sub>4</sub>·5H<sub>2</sub>O (55 mg, 0.22 mmol) and sodium ascorbate (175 mg, 0.88 mmol) were reacted. After the work-up the residue was purified by flash column chromatography (CH<sub>2</sub>Cl<sub>2</sub>/MeOH, 100:2) to give **7d** (779 mg, 72%) as a colorless oil. <sup>1</sup>H NMR (CDCl<sub>3</sub>, 400 MHz) δ (ppm): 8.01 (s, 1H, Ar), 7.61 (d, *J* = 8.3 Hz, 1H, Ar), 7.55 (s, 1H, Ar), 7.38 (d, *J* = 8.4 Hz, 1H, Ar), 7.32 - 7.18 (m, 5H, Ar), 5.48 (br s, 1H, NHCbz), 5.02 (s, 2H, NHCOOCH<sub>2</sub>), 4.70 (br s, 1H, NHCON), 4.26 (t, *J* = 5.7 Hz, 2H, OCH<sub>2</sub>), 3.63 (t, *J* = 8.0 Hz, 2H, CH<sub>2</sub>CH<sub>2</sub>NHCON), 3.55 (t, *J* = 5.7 Hz, 2H, OCH<sub>2</sub>CH<sub>2</sub>), 3.25 (t, *J* = 8.0 Hz, 2H, CH<sub>2</sub>CH<sub>2</sub>NHCON), 3.16 (q, *J* = 6.6 Hz, 2H, CH<sub>2</sub>NHCbz), 2.76 (t, *J* = 7.3 Hz, 2H, TrizCH<sub>2</sub>), 1.85 - 1.79 (m, 2H, TrizCH<sub>2</sub>CH<sub>2</sub>); <sup>13</sup>C NMR (CDCl<sub>3</sub>, 75 MHz) δ (ppm): 162.9 (NHCON), 161.4 (OC<sub>Ar</sub>), 156.7 (NHCOO), 148.4 (C<sub>Ar</sub>), 141.5 (C<sub>Ar</sub>), 136.5 (CH<sub>Ar</sub>), 135.1 (CH<sub>Ar</sub>), 128.7 (CH<sub>Ar</sub>), 128.3 (CH<sub>Ar</sub>), 119.7 (CH<sub>Ar</sub>), 115.7 (CN), 112.0 (CH<sub>Ar</sub>), 104.1 (CH<sub>Ar</sub>), 101.4 (C<sub>Ar</sub>), 68.6 (OCH<sub>2</sub>), 66.9 (NHCOOCH<sub>2</sub>), 47.2 (CH<sub>2</sub>CH<sub>2</sub>NHCON), 42.6 (OCH<sub>2</sub>CH<sub>2</sub>), 39.8 (CH<sub>2</sub>NHCbz), 38.5 (CH<sub>2</sub>CH<sub>2</sub>NHCON), 29.0 (TrizCH<sub>2</sub>CH<sub>2</sub>), 22.3 (TrizCH<sub>2</sub>); HRMS (ES, positive mode) *m/z*: calculated for C<sub>25</sub>H<sub>27</sub>N<sub>7</sub>O<sub>4</sub> 489.2124; Found 489.2126 (0.21 ppm).

**Methyl 4-(1-(4-cyano-3-(2-(2-oxoimidazolidin-1-yl)ethoxy)phenyl)-1H-1,2,3-triazol-4-yl)butanoate (7e).** Following the general procedure, azide **5a** (472 mg, 1.73 mmol) was reacted with methyl 4-butynylcarboxylate (293 mg, 2.25 mmol), CuSO<sub>4</sub>·5H<sub>2</sub>O (43 mg, 0.18 mmol) and sodium ascorbate (137 mg, 0.69 mmol). Work-up and purification of the residue by flash column chromatography (CH<sub>2</sub>Cl<sub>2</sub>/MeOH, 100:2) gave **7e** (451 mg, 65%) as a white solid. M.p.: 122.4 - 123.6 °C; <sup>1</sup>H NMR (CDCl<sub>3</sub>, 400 MHz) δ (ppm): 7.90 (s, 1H, Ar), 7.67 (d, *J* = 8.4 Hz, 1H, Ar), 7.54 (d, *J* = 2.0 Hz, 1H, Ar), 7.36 (dd, *J* = 8.4, 2.9 Hz, 1H, Ar), 4.98 (br s, 1H, NHCON), 4.32 (t, *J* = 5.1 Hz, 2H, OCH<sub>2</sub>), 3.75 (dd, *J* = 9.0, 6.8 Hz, 2H, CH<sub>2</sub>CH<sub>2</sub>NHCON), 3.44 (dd, *J* = 9.0, 6.9 Hz, 2H, CH<sub>2</sub>CH<sub>2</sub>NHCON), 2.83 (t, *J* = 7.5 Hz, 2H, CH<sub>2</sub>COOMe), 2.41 (t, *J* = 7.3 Hz, 2H, TrizCH<sub>2</sub>), 2.05 (quint, *J* = 7.5 Hz, 2H, TrizCH<sub>2</sub>CH<sub>2</sub>);

$^{13}\text{C}$  NMR ( $\text{CDCl}_3$ , 75 MHz)  $\delta$  (ppm): 173.7 (COO), 162.8 (NHCON), 161.5 ( $\text{OC}_{\text{Ar}}$ ), 148.7 ( $\text{C}_{\text{Ar}}$ ), 141.5 ( $\text{C}_{\text{Ar}}$ ), 135.0 ( $\text{CH}_{\text{Ar}}$ ), 119.2 ( $\text{CH}_{\text{Ar}}$ ), 115.6 (CN), 112.0 ( $\text{CH}_{\text{Ar}}$ ), 104.1 ( $\text{CH}_{\text{Ar}}$ ), 101.6 ( $\text{C}_{\text{Ar}}$ ), 69.3 ( $\text{OCH}_2$ ), 51.7 (Me), 47.4 ( $\text{CH}_2\text{CH}_2\text{NHCON}$ ), 43.0 ( $\text{OCH}_2\text{CH}_2$ ), 38.6 ( $\text{CH}_2\text{CH}_2\text{NHCON}$ ), 33.3 ( $\text{CH}_2\text{COOMe}$ ), 24.9 (Triz $\text{CH}_2\text{CH}_2$ ), 24.4 (Triz $\text{CH}_2$ ); HRMS (ES, positive mode)  $m/z$ : calculated for  $\text{C}_{19}\text{H}_{22}\text{N}_6\text{O}_4$  398.1702; Found 398.1702 (-0.16 ppm).

**4-(4-Butyl-1H-1,2,3-triazol-1-yl)-2-(2-(2-oxoimidazolidin-1-yl)ethoxy)benzotrile (7f).**

According to the general procedure, azide **5a** (269 mg, 0.99 mmol), 1-hexyne (109 mg, 1.28 mmol),  $\text{CuSO}_4 \cdot 5\text{H}_2\text{O}$  (25 mg, 0.10 mmol) and sodium ascorbate (78 mg, 0.40 mmol) were reacted. After work-up and purification ( $\text{CH}_2\text{Cl}_2/\text{MeOH}$ , 100:1), **7f** (277 mg, 79%) was obtained as a white solid. M.p.: 187-190 °C;  $^1\text{H}$  NMR ( $\text{CDCl}_3$ , 400 MHz)  $\delta$  (ppm): 7.80 (s, 1H, Ar), 7.69 (d,  $J = 8.3$  Hz, 1H, Ar), 7.53 (d,  $J = 1.9$  Hz, 1H, Ar), 7.36 (dd,  $J = 8.4, 1.9$  Hz, 1H, Ar), 4.53 (br s, 1H, NHCON), 4.34 (t,  $J = 5.0$  Hz, 2H,  $\text{OCH}_2$ ), 3.79 (t,  $J = 7.6$  Hz, 2H,  $\text{CH}_2\text{CH}_2\text{NHCON}$ ), 3.68 (t,  $J = 4.9$  Hz, 2H,  $\text{OCH}_2\text{CH}_2$ ), 3.46 (t,  $J = 7.7$  Hz, 2H,  $\text{CH}_2\text{CH}_2\text{NHCON}$ ), 2.80 (t,  $J = 7.7$  Hz, 2H, Triz $\text{CH}_2$ ), 1.73 (quin,  $J = 7.5$  Hz, 2H, Triz $\text{CH}_2\text{CH}_2$ ), 1.52 (sex,  $J = 7.4$  Hz, 2H,  $\text{CH}_2\text{CH}_3$ ), 0.96 (t,  $J = 7.3$  Hz, 3H,  $\text{CH}_3$ );  $^{13}\text{C}$  NMR ( $\text{CDCl}_3$ , 75 MHz)  $\delta$  (ppm): 162.7 (NHCON), 161.6 ( $\text{OC}_{\text{Ar}}$ ), 150.1 ( $\text{C}_{\text{Ar}}$ ), 141.6 ( $\text{C}_{\text{Ar}}$ ), 135.1 ( $\text{CH}_{\text{Ar}}$ ), 118.7 ( $\text{CH}_{\text{Ar}}$ ), 115.7 (CN), 112.0 ( $\text{CH}_{\text{Ar}}$ ), 104.1 ( $\text{CH}_{\text{Ar}}$ ), 101.6 ( $\text{C}_{\text{Ar}}$ ), 69.5 ( $\text{OCH}_2$ ), 47.5 ( $\text{CH}_2\text{CH}_2\text{NHCON}$ ), 43.1 ( $\text{OCH}_2\text{CH}_2$ ), 38.6 ( $\text{CH}_2\text{CH}_2\text{NHCON}$ ), 31.4 (Triz $\text{CH}_2\text{CH}_2$ ), 25.4 (Triz $\text{CH}_2$ ), 22.4 ( $\text{CH}_2\text{CH}_3$ ), 13.9 ( $\text{CH}_3$ ); MS (ESI, positive mode)  $m/z$ : 377.2 [ $\text{M}+\text{Na}$ ] $^+$ , 355.2 [ $\text{M}+\text{H}$ ] $^+$ .

**4-(4-(4-Hydroxybutyl)-1H-1,2,3-triazol-1-yl)-2-(2-(2-oxoimidazolidin-1-**

**yl)ethoxy)benzotrile (7g).** Following the general CuAAC procedure, azide **5a** (250 mg, 0.92 mmol), commercially available 5-hexyn-1-ol (122 mg, 1.19 mmol),  $\text{CuSO}_4 \cdot 5\text{H}_2\text{O}$  (23 mg, 0.09 mmol) in EtOH (20 mL) and sodium ascorbate (73 mg, 0.40 mmol) were reacted. Purification of the final residue by flash column chromatography ( $\text{CH}_2\text{Cl}_2/\text{MeOH}$ , 100:7) provided **7g** (204 mg, 55%) as a white solid. M.p.: 138-140 °C;  $^1\text{H}$  NMR ( $\text{CD}_3\text{OD}$ , 400

MHz)  $\delta$  (ppm): 8.48 (s, 1H, Ar), 7.81 (d,  $J$  = 8.4 Hz, 1H, Ar), 7.70 (d,  $J$  = 1.9 Hz, 1H, Ar), 7.61 (dd,  $J$  = 8.4, 1.9 Hz, 1H, Ar), 4.39 (t,  $J$  = 5.2 Hz, 2H, OCH<sub>2</sub>), 3.76 (dd,  $J$  = 9.0, 7.2 Hz, 2H, CH<sub>2</sub>CH<sub>2</sub>NHCON), 3.64 (t,  $J$  = 5.1 Hz, 2H, OCH<sub>2</sub>CH<sub>2</sub>), 3.61 (t,  $J$  = 6.4 Hz, 2H, CH<sub>2</sub>OH), 3.43 (dd,  $J$  = 9.0, 7.2 Hz, 2H, CH<sub>2</sub>CH<sub>2</sub>NHCON), 2.82 (t,  $J$  = 7.6 Hz, 2H, TrizCH<sub>2</sub>), 1.82 (quin,  $J$  = 6.5 Hz, 2H, TrizCH<sub>2</sub>CH<sub>2</sub>), 1.63 (quin,  $J$  = 6.5 Hz, 2H, CH<sub>2</sub>CH<sub>2</sub>OH); <sup>13</sup>C NMR (CD<sub>3</sub>OD, 75 MHz)  $\delta$  (ppm): 165.1 (NHCON), 162.9 (OC<sub>Ar</sub>), 150.5 (C<sub>Ar</sub>), 142.9 (C<sub>Ar</sub>), 136.3 (CH<sub>Ar</sub>), 121.5 (CH<sub>Ar</sub>), 116.6 (CN), 113.5 (CH<sub>Ar</sub>), 105.3 (CH<sub>Ar</sub>), 102.5 (C<sub>Ar</sub>), 70.1 (OCH<sub>2</sub>), 62.5 (CH<sub>2</sub>OH), 50.5 (CH<sub>2</sub>CH<sub>2</sub>NHCON), 43.9 (OCH<sub>2</sub>CH<sub>2</sub>), 39.4 (CH<sub>2</sub>CH<sub>2</sub>NHCON), 33.0 (CH<sub>2</sub>CH<sub>2</sub>OH), 26.7 (TrizCH<sub>2</sub>CH<sub>2</sub>), 26.1 (TrizCH<sub>2</sub>); MS (ESI, positive mode)  $m/z$ : 763.5 [2M+Na]<sup>+</sup>, 393.2 [M+Na]<sup>+</sup>, 371.2 [M+H]<sup>+</sup>.

**General procedure for the synthesis of thioamides (8a-g).** A solution of the corresponding benzonitriles **7a-g** (1 eq) in DMF was treated with an excess of 20% aq. (NH<sub>4</sub>)<sub>2</sub>S (70 eq). A change of yellow to dark blue color was instantly observed. The reaction mixture was heated at 80 °C for 4 h and then allowed to cool to room temperature. CH<sub>2</sub>Cl<sub>2</sub> (50 mL) was added and the resulting solution was successively washed with HCl 0.1 N (2 x 50 mL), H<sub>2</sub>O (1 x 50 mL) and brine (1 x 50 mL). The organic layers were dried (Na<sub>2</sub>SO<sub>4</sub>), filtered and evaporated to dryness. The crude was purified by flash column chromatography (eluents are specified for each compound).

**Tert-butyl-(4-(1-(4-carbamothioyl-3-(2-(2-oxoimidazolidin-1-yl)ethoxy)phenyl)-1H-1,2,3-triazol-4-yl)butyl)carbamate (8a).** According to the general procedure, a solution of benzonitrile **7a** in DMF (10 mL) and 20% aq solution of (NH<sub>4</sub>)<sub>2</sub>S (1 mL, 13.8 mmol) were reacted. Work-up and purification of the crude by flash column chromatography (CH<sub>2</sub>Cl<sub>2</sub>/MeOH, 100:5) gave 64 mg (67%) of **8a** as a yellow oil. IR (KBr),  $\nu$  (cm<sup>-1</sup>): 3351 (NH st), 1682 (C=O st); <sup>1</sup>H NMR (DMSO-d<sub>6</sub>, 400 MHz)  $\delta$  (ppm): 10.10 (br s, 1H, SCNH<sub>2</sub>), 9.43 (br s, 1H, SCNH<sub>2</sub>), 8.68 (s, 1H, Ar), 7.88 (dd,  $J$  = 8.4, 1.1 Hz, 1H, Ar), 7.56 (d,  $J$  = 1.6 Hz, 1H, Ar), 7.51 (dd,  $J$  = 8.4, 1.7 Hz, 1H, Ar), 6.82 (br s, 1H, NHCON), 6.38 (br s, 1H,

NHBoc), 4.25 (t,  $J = 5.2$  Hz, 2H, OCH<sub>2</sub>), 3.55 - 3.45 (m, 4H, CH<sub>2</sub>CH<sub>2</sub>NHCON, OCH<sub>2</sub>CH<sub>2</sub>), 3.22 (t,  $J = 7.8$  Hz, 2H, CH<sub>2</sub>CH<sub>2</sub>NHCON), 2.98 - 2.93 (m, 2H, CH<sub>2</sub>NHBoc), 2.71 (t,  $J = 7.5$  Hz, 2H, TrizCH<sub>2</sub>), 1.70 - 1.60 (m, 2H, TrizCH<sub>2</sub>CH<sub>2</sub>), 1.51 - 1.41 (m, 2H, CH<sub>2</sub>CH<sub>2</sub>NHBoc), 1.36 (s, 9H, CH<sub>3</sub>); <sup>13</sup>C NMR (DMSO-d<sub>6</sub>, 75 MHz)  $\delta$  (ppm): 197.5 (SCNH<sub>2</sub>), 162.2 (NHCON), 155.6 (NHCOO), 154.3 (OC<sub>Ar</sub>), 148.1 (C<sub>Ar</sub>), 138.5 (C<sub>Ar</sub>), 132.5 (CH<sub>Ar</sub>), 129.8 (C<sub>Ar</sub>), 120.3 (CH<sub>Ar</sub>), 111.1 (CH<sub>Ar</sub>), 103.9 (CH<sub>Ar</sub>), 77.3 (OC(CH<sub>3</sub>)<sub>3</sub>), 67.7 (OCH<sub>2</sub>), 45.6 (CH<sub>2</sub>CH<sub>2</sub>NHCON), 42.6 (OCH<sub>2</sub>CH<sub>2</sub>), 37.6 (CH<sub>2</sub>CH<sub>2</sub>NHCON), 29.0 (CH<sub>2</sub>CH<sub>2</sub>NHBoc), 28.3 (CH<sub>3</sub>), 26.0 (TrizCH<sub>2</sub>CH<sub>2</sub>), 24.7 (TrizCH<sub>2</sub>); MS (ESI, positive mode)  $m/z$ : 526.3 [M+Na]<sup>+</sup>, 504.3 [M+H]<sup>+</sup>.

***Benzyl-(4-(1-(4-carbamothioyl-3-methoxyphenyl)-1H-1,2,3-triazol-4-***

***yl)butyl)carbamate (8c)***. The general procedure was followed with benzonitrile **7c** (1.07 g, 2.64 mmol). After the work-up, **8c** (1.15 g, >99%) was obtained as a yellow oil that was used in the next step without further purification. <sup>1</sup>H NMR (DMSO-d<sub>6</sub>, 400 MHz)  $\delta$  (ppm): 10.08 (br s, 1H, SCNH<sub>2</sub>), 9.42 (br s, 1H, SCNH<sub>2</sub>), 8.67 (s, 1H, Ar), 7.87 (d,  $J = 8.4$  Hz, 1H, Ar), 7.54 (d,  $J = 2.0$  Hz, 1H, Ar), 7.49 (dd, 1H,  $J = 8.4, 2.0$  Hz, Ar), 7.40 - 7.17 (m, 6H, Ar, NHCbz), 5.01 (s, 2H, NHCOOCH<sub>2</sub>), 3.93 (s, 3H, OCH<sub>3</sub>), 3.06 (q,  $J = 6.6$  Hz, 2H, CH<sub>2</sub>NHCbz), 2.72 (t,  $J = 7.5$  Hz, 2H, TrizCH<sub>2</sub>), 1.68 (quin,  $J = 7.5$  Hz, 2H, TrizCH<sub>2</sub>CH<sub>2</sub>), 1.50 (quin,  $J = 7.1$  Hz, 2H, CH<sub>2</sub>CH<sub>2</sub>NHCbz); <sup>13</sup>C NMR (DMSO-d<sub>6</sub>, 75 MHz)  $\delta$  (ppm): 197.5 (SCNH<sub>2</sub>), 156.1 (OC<sub>Ar</sub>), 155.2 (NHCOO), 148.1 (C<sub>Ar</sub>), 138.5 (C<sub>Ar</sub>), 137.3 (C<sub>Ar</sub>), 132.4 (CH<sub>Ar</sub>), 129.8 (CH<sub>Ar</sub>), 128.3 (CH<sub>Ar</sub>), 127.7 (CH<sub>Ar</sub>), 127.6 (CH<sub>Ar</sub>), 120.4 (CH<sub>Ar</sub>), 110.9 (CH<sub>Ar</sub>), 103.2 (CH<sub>Ar</sub>), 65.1 (NHCOOCH<sub>2</sub>), 56.3 (OCH<sub>3</sub>), 40.0 (CH<sub>2</sub>NHCbz), 28.9 (CH<sub>2</sub>CH<sub>2</sub>NHCbz), 26.0 (TrizCH<sub>2</sub>CH<sub>2</sub>), 24.7 (TrizCH<sub>2</sub>); HRMS (ES, positive mode)  $m/z$ : calculated for C<sub>22</sub>H<sub>25</sub>N<sub>5</sub>O<sub>3</sub>S 439.1678; Found 439.1674 (-0.96 ppm).

***Benzyl-(3-(1-(4-carbamothioyl-3-((1-(2-oxoimidazolidin-1-yl)ethoxy)phenyl)-1H-1,2,3-***

***triazol-4-yl)propyl)carbamate (8d)***. The general procedure was followed with **7d** (779 mg, 1.59 mmol) and 20% aq (NH<sub>4</sub>)<sub>2</sub>S (7.6 mL, 0.11 mol). Purification of the final residue by flash column chromatography (CH<sub>2</sub>Cl<sub>2</sub>/MeOH, 100:5) gave **8d** (655 mg, 79%) as a



yellow oil.  $^1\text{H}$  NMR ( $\text{CDCl}_3$ , 400 MHz)  $\delta$  (ppm): 9.69 (br s, 1H,  $\text{SCNH}_2$ ), 9.49 (br s, 1H,  $\text{SCNH}_2$ ), 8.69 (d,  $J = 8.7$  Hz, 1H, Ar), 7.84 (s, 1H, Ar), 7.42 (s, 1H, Ar), 7.38 - 7.13 (m, 5H, Ar), 7.09 (dd,  $J = 8.7, 2.0$  Hz, 1H, Ar), 6.03 (br s, 1H,  $\text{NHCON}$ ), 5.18 (t,  $J = 6.2$  Hz, 1H,  $\text{NHCbz}$ ), 5.02 (s, 2H,  $\text{NHCOOCH}_2$ ), 4.13 (t,  $J = 4.3$  Hz, 2H,  $\text{OCH}_2$ ), 3.63 (t,  $J = 4.5$  Hz, 2H,  $\text{OCH}_2\text{CH}_2$ ), 3.49 (dd,  $J = 9.4, 6.4$  Hz, 2H,  $\text{CH}_2\text{CH}_2\text{NHCON}$ ), 3.38 (dd,  $J = 9.4, 6.5$  Hz, 2H,  $\text{CH}_2\text{CH}_2\text{NHCON}$ ), 3.19 (q,  $J = 6.7$  Hz, 2H,  $\text{CH}_2\text{NHCbz}$ ), 2.74 (t,  $J = 7.4$  Hz, 2H,  $\text{TrizCH}_2$ ), 1.93 - 1.80 (m, 2H,  $\text{TrizCH}_2\text{CH}_2$ );  $^{13}\text{C}$  NMR ( $\text{CDCl}_3$ , 75 MHz)  $\delta$  (ppm): 196.9 ( $\text{SCNH}_2$ ), 163.3 ( $\text{NHCON}$ ), 156.8 ( $\text{NHCOO}$ ), 156.2 ( $\text{OC}_{\text{Ar}}$ ), 148.4 ( $\text{C}_{\text{Ar}}$ ), 140.4 ( $\text{C}_{\text{Ar}}$ ), 138.1 ( $\text{CH}_{\text{Ar}}$ ), 137.0 ( $\text{CH}_{\text{Ar}}$ ), 128.7 ( $\text{CH}_{\text{Ar}}$ ), 128.2 ( $\text{CH}_{\text{Ar}}$ ), 125.6 ( $\text{C}_{\text{Ar}}$ ), 119.4 ( $\text{CH}_{\text{Ar}}$ ), 111.6 ( $\text{CH}_{\text{Ar}}$ ), 104.3 ( $\text{CH}_{\text{Ar}}$ ), 66.9 ( $\text{OCH}_2$ ), 66.8 ( $\text{NHCOOCH}_2$ ), 45.6 ( $\text{CH}_2\text{CH}_2\text{NHCON}$ ), 43.3 ( $\text{OCH}_2\text{CH}_2$ ), 40.5 ( $\text{CH}_2\text{NHCbz}$ ), 38.4 ( $\text{CH}_2\text{CH}_2\text{NHCON}$ ), 29.5 ( $\text{CH}_2\text{CH}_2\text{NHCbz}$ ), 22.8 ( $\text{TrizCH}_2$ ); HRMS (ES, positive mode)  $m/z$ : calculated for  $\text{C}_{25}\text{H}_{29}\text{N}_7\text{O}_4\text{S}$  523.2002; Found 523.2007 (0.96 ppm).

**Methyl-4-(1-(4-carbamothioyl-3-(2-(2-oxoimidazolidin-1-yl)ethoxy)phenyl)-1H-1,2,3-triazol-4-yl)butanoate (8e).** Following the general procedure benzonitrile **7e** (416 mg, 1.04 mmol) and 20% aq  $(\text{NH}_4)_2\text{S}$  (4.44 mL, 65.3 mmol) were reacted, to give, after work-up, **8e** (434 mg, quantitative) as a yellow solid. M.p.: 156.5 - 159.5  $^\circ\text{C}$ ;  $^1\text{H}$  NMR ( $\text{CDCl}_3$ , 400 MHz)  $\delta$  (ppm): 9.55 (br s, 1H,  $\text{SCNH}_2$ ), 9.46 (br s, 1H,  $\text{SCNH}_2$ ), 8.83 (d,  $J = 8.7$  Hz, 1H, Ar), 7.84 (s, 1H, Ar), 7.58 (d,  $J = 2.1$  Hz, 1H, Ar), 7.18 (dd,  $J = 8.7, 2.0$  Hz, 1H, Ar), 5.76 (br s, 1H,  $\text{NHCON}$ ), 4.27 (t,  $J = 4.5$  Hz, 2H,  $\text{OCH}_2$ ), 3.75 (t,  $J = 4.5$  Hz, 2H,  $\text{OCH}_2\text{CH}_2$ ), 3.58 (dd,  $J = 8.8, 5.8$  Hz, 2H,  $\text{CH}_2\text{CH}_2\text{NHCON}$ ), 3.51 (dd,  $J = 9.2, 6.1$  Hz, 2H,  $\text{CH}_2\text{CH}_2\text{NHCON}$ ), 2.85 (t,  $J = 7.6$  Hz, 2H,  $\text{CH}_2\text{COOMe}$ ), 2.43 (t,  $J = 7.4$  Hz, 2H,  $\text{TrizCH}_2$ ), 2.08 (quint,  $J = 7.5$  Hz, 2H,  $\text{TrizCH}_2\text{CH}_2$ );  $^{13}\text{C}$  NMR ( $\text{CDCl}_3$ , 75 MHz)  $\delta$  (ppm): 196.1 ( $\text{SCNH}_2$ ), 173.8 ( $\text{COO}$ ), 163.5 ( $\text{NHCON}$ ), 156.4 ( $\text{OC}_{\text{Ar}}$ ), 148.5 ( $\text{C}_{\text{Ar}}$ ), 140.2 ( $\text{C}_{\text{Ar}}$ ), 138.5 ( $\text{C}_{\text{Ar}}$ ), 125.1 ( $\text{CH}_{\text{Ar}}$ ), 119.2 ( $\text{CH}_{\text{Ar}}$ ), 111.2 ( $\text{CH}_{\text{Ar}}$ ), 103.9 ( $\text{CH}_{\text{Ar}}$ ), 66.8 ( $\text{OCH}_2$ ), 51.8 (Me), 45.4 ( $\text{CH}_2\text{CH}_2\text{NHCON}$ ), 43.3 ( $\text{OCH}_2\text{CH}_2$ ), 38.3 ( $\text{CH}_2\text{CH}_2\text{NHCON}$ ), 33.4 ( $\text{CH}_2\text{COOMe}$ ), 25.0 ( $\text{TrizCH}_2\text{CH}_2$ ), 24.6 ( $\text{TrizCH}_2$ ); HRMS (ES, positive mode)  $m/z$ : calculated for  $\text{C}_{19}\text{H}_{24}\text{N}_6\text{O}_4\text{S}$  432.1580; Found 432.1559 (-4.82 ppm).

**4-(4-Butyl-1H-1,2,3-triazol-1-yl)-2-(2-(2-oxoimidazolidin-1-yl)ethoxy)benzothioamide**

**(8f)**. According to the general thionation procedure, benzonitrile **7f** (550 mg, 1.55 mmol) and 20% aq (NH<sub>4</sub>)<sub>2</sub>S (7.4 mL, 109 mmol) were reacted. Work-up and purification by flash column chromatography (CH<sub>2</sub>Cl<sub>2</sub>/MeOH, 100:2) gave **8f** (505 mg, 84%) as a yellow solid. M.p.: 145-148 °C; <sup>1</sup>H NMR (CDCl<sub>3</sub>, 400 MHz) δ (ppm): 9.74 (br s, 1H, SCN<sub>2</sub>H), 9.59 (br s, 1H, SCN<sub>2</sub>H), 8.81 (d, *J* = 8.7 Hz, 1H, Ar), 7.79 (s, 1H, Ar), 7.57 (d, *J* = 2.0 Hz, 1H, Ar), 7.16 (dd, *J* = 8.7, 2.0 Hz, 1H, Ar), 6.05 (br s, 1H, NHCON), 4.25 (t, *J* = 4.4 Hz, 2H, OCH<sub>2</sub>), 3.75 (t, *J* = 4.5 Hz, 2H, OCH<sub>2</sub>CH<sub>2</sub>), 3.58 (dd, *J* = 9.8, 6.7 Hz, 2H, CH<sub>2</sub>CH<sub>2</sub>NHCON), 3.50 (dd, *J* = 9.0, 6.0 Hz, 2H, CH<sub>2</sub>CH<sub>2</sub>NHCON), 2.79 (t, *J* = 7.7 Hz, 2H, TrizCH<sub>2</sub>), 1.71 (quin, *J* = 7.7 Hz, 2H, TrizCH<sub>2</sub>CH<sub>2</sub>), 1.42 (sex, *J* = 7.4 Hz, 2H, CH<sub>2</sub>CH<sub>3</sub>), 0.95 (t, *J* = 7.4 Hz, 3H, CH<sub>3</sub>); <sup>13</sup>C NMR (CDCl<sub>3</sub>, 100 MHz) δ (ppm): 195.9 (SCNH<sub>2</sub>), 163.6 (NHCON), 156.4 (OC<sub>Ar</sub>), 149.8 (C<sub>Ar</sub>), 140.3 (C<sub>Ar</sub>), 138.4 (CH<sub>Ar</sub>), 124.9 (C<sub>Ar</sub>), 118.8 (CH<sub>Ar</sub>), 111.0 (CH<sub>Ar</sub>), 103.8 (CH<sub>Ar</sub>), 66.8 (OCH<sub>2</sub>), 45.4 (CH<sub>2</sub>CH<sub>2</sub>NHCON), 43.3 (OCH<sub>2</sub>CH<sub>2</sub>), 38.3 (CH<sub>2</sub>CH<sub>2</sub>NHCON), 31.5 (TrizCH<sub>2</sub>CH<sub>2</sub>), 25.4 (TrizCH<sub>2</sub>), 22.4 (CH<sub>2</sub>CH<sub>3</sub>), 13.9 (CH<sub>3</sub>); MS (ESI, positive mode) m/z: 389.2 [M+H]<sup>+</sup>.

**4-(4-(4-Hydroxybutyl)-1H-1,2,3-triazol-1-yl)-2-(2-(2-oxoimidazolidin-1-yl)ethoxy)**

**benzothioamide (8g)**. According to the general procedure, **7g** (375 mg, 1.01 mmol) and 20% aq (NH<sub>4</sub>)<sub>2</sub>S (4.8 mL, 70.9 mmol) were reacted. After the work-up **8g** (408 mg, >99%) was obtained as a yellow solid, which was used in the next step without further purification. M.p.: Decompose without melting; <sup>1</sup>H NMR (CD<sub>3</sub>OD, 400 MHz) δ (ppm): 8.47 (s, 1H, Ar), 8.17 (d, *J* = 8.5 Hz, 1H, Ar), 7.60 (d, *J* = 2.0 Hz, 1H, Ar), 7.49 (dd, *J* = 8.5, 2.0 Hz, 1H, Ar), 4.34 (t, *J* = 5.0 Hz, 2H, OCH<sub>2</sub>), 3.70 - 3.58 (m, 6H, CH<sub>2</sub>OH, OCH<sub>2</sub>CH<sub>2</sub>, CH<sub>2</sub>CH<sub>2</sub>NHCON), 3.41 (dd, *J* = 9.3, 6.9 Hz, 2H, CH<sub>2</sub>CH<sub>2</sub>NHCON), 2.86 (t, *J* = 7.6 Hz, 2H, TrizCH<sub>2</sub>), 1.87 - 1.77 (m, 2H, TrizCH<sub>2</sub>CH<sub>2</sub>), 1.68 - 1.59 (m, 2H, CH<sub>2</sub>CH<sub>2</sub>OH); <sup>13</sup>C NMR (CD<sub>3</sub>OD, 75 MHz) δ (ppm): 200.5 (SCNH<sub>2</sub>), 165.6 (NHCON), 156.9 (OC<sub>Ar</sub>), 150.6 (C<sub>Ar</sub>), 141.1 (C<sub>Ar</sub>), 135.5 (CH<sub>Ar</sub>), 130.9 (C<sub>Ar</sub>), 121.9 (CH<sub>Ar</sub>), 113.2 (CH<sub>Ar</sub>), 105.9 (CH<sub>Ar</sub>), 69.2

(OCH<sub>2</sub>), 63.0 (CH<sub>2</sub>OH), 47.6 (CH<sub>2</sub>CH<sub>2</sub>NHCON), 44.4 (OCH<sub>2</sub>CH<sub>2</sub>), 39.7 (CH<sub>2</sub>CH<sub>2</sub>NHCON), 33.4 (CH<sub>2</sub>CH<sub>2</sub>OH), 27.2 (TrizCH<sub>2</sub>CH<sub>2</sub>), 26.5 (TrizCH<sub>2</sub>); MS (ESI, positive mode) m/z: 831.3 [2M+Na]<sup>+</sup>, 427.0 [M+Na]<sup>+</sup>, 405.2 [M+H]<sup>+</sup>.

**General procedure for the synthesis of thiazoles by Hantzsch cyclization (11f-s and 12d-f).** A solution of the thioamides **8** (1 eq) in <sup>i</sup>PrOH (15 mL) was treated with the appropriated α-bromomethylketone **10c**, **10m,f-s** (1 eq). The reaction mixture was stirred at 70 °C for 3 - 6 h in a pressure tube and then, it was allowed to cool to room temperature and concentrated to dryness under reduced pressure. The residue was purified by flash column chromatography or by CCTLC on the Chromatotron (eluent are specified in each case).

**1-(2-(5-(4-butyl-1H-1,2,3-triazol-1-yl)-2-(4-(2-([1,1'-biphenyl]-4-yl)vinyl)thiazol-2-yl)phenoxy)ethyl)imidazolidin-2-one (11f).** Following the general Hantzsch procedure, the thioamide **8f** (140 mg, 0.36 mmol) and α-bromomethylketone **10c** (108 mg, 0.36 mmol) were reacted for 4 h. The residue was purified by flash column chromatography (CH<sub>2</sub>Cl<sub>2</sub>/MeOH, 98:2) to yield **11f** (110 mg, 65%) as a colorless oil. <sup>1</sup>H NMR (CDCl<sub>3</sub>, 400 MHz) δ (ppm): 8.59 (d, *J* = 8.5 Hz, 1H, Ar), 7.74 (s, 1H, Ar), 7.64 - 7.47 (m, 8H, Ar, ThiazCH=CH), 7.35 (t, *J* = 7.5 Hz, 2H, Ar), 7.34 - 7.17 (m, 3H, Ar), 7.13 (d, *J* = 15.9 Hz, 1H, ThiazCH=CH), 4.60 (br s, 1H, NHCON), 4.38 (t, *J* = 5.4 Hz, 2H, OCH<sub>2</sub>), 3.75 (t, *J* = 5.4 Hz, 2H, OCH<sub>2</sub>CH<sub>2</sub>), 3.54 (dd, *J* = 9.0, 6.6 Hz, 2H, CH<sub>2</sub>CH<sub>2</sub>NHCON), 3.34 (dd, *J* = 9.1, 6.5 Hz, 2H, CH<sub>2</sub>CH<sub>2</sub>NHCON), 2.74 (t, *J* = 7.7 Hz, 2H, TrizCH<sub>2</sub>), 1.66 (quin, *J* = 7.6 Hz, 2H, TrizCH<sub>2</sub>CH<sub>2</sub>), 1.38 (sex, *J* = 7.4 Hz, 2H, CH<sub>2</sub>CH<sub>3</sub>), 0.90 (t, *J* = 7.4 Hz, 3H, CH<sub>3</sub>); <sup>13</sup>C NMR (CDCl<sub>3</sub>, 100 MHz) δ (ppm): 162.7 (NHCON), 161.0 (OC<sub>Ar</sub>), 156.3 (C<sub>Ar</sub>), 153.5 (C<sub>Ar</sub>), 149.6 (C<sub>Ar</sub>), 140.7 (C<sub>Ar</sub>), 140.7 (C<sub>Ar</sub>), 138.7 (C<sub>Ar</sub>), 136.3 (C<sub>Ar</sub>), 131.0 (CH<sub>Ar</sub>), 130.3 (CH<sub>Ar</sub>), 128.9 (CH<sub>Ar</sub>), 127.5 (CH<sub>Ar</sub>), 127.3 (CH<sub>Ar</sub>), 127.2 (CH<sub>Ar</sub>), 127.0 (CH<sub>Ar</sub>), 122.4 (C<sub>Ar</sub>), 121.6 (CH<sub>Ar</sub>), 118.8 (CH<sub>Ar</sub>), 117.1 (CH<sub>Ar</sub>), 112.4 (CH<sub>Ar</sub>), 104.6 (CH<sub>Ar</sub>), 68.1 (OCH<sub>2</sub>), 46.5 (CH<sub>2</sub>CH<sub>2</sub>NHCON), 43.2 (OCH<sub>2</sub>CH<sub>2</sub>), 38.5 (CH<sub>2</sub>CH<sub>2</sub>NHCON), 31.6 (TrizCH<sub>2</sub>CH<sub>2</sub>), 25.5

(TrizCH<sub>2</sub>), 22.5 (CH<sub>2</sub>CH<sub>3</sub>), 14.0 (CH<sub>3</sub>); HRMS (ES, positive mode) m/z: calculated for C<sub>34</sub>H<sub>34</sub>N<sub>6</sub>O<sub>2</sub>S 590.2464; Found 590.2474 (1.66 ppm).

**Methyl-4-(1-(3-(2-(2-oxoimidazolidin-1-yl)ethoxy)-4-(4-phenethylthiazol-2-yl)phenyl)-1H-1,2,3-triazol-4-yl)butanoate (11g).** Following the Hantzsch procedure, thioamide **8e** (300 mg, 0.69 mmol) and the commercially available 1-bromo-4-phenylbutan-2-one **10a** (158 mg, 0.69 mmol) were reacted for 4 h. After the work-up, the residue was purified by CCTLC on the Chromatotron (CH<sub>2</sub>Cl<sub>2</sub>/MeOH, 100:3) to yield **11g** (305 mg, 76%) as a colorless oil. <sup>1</sup>H NMR (CDCl<sub>3</sub>, 400 MHz) δ (ppm): 8.47 (d, *J* = 8.5 Hz, 1H, Ar), 7.80 (s, 1H, Ar), 7.52 (d, *J* = 2.0 Hz, 1H, Ar), 7.28 (dd, *J* = 8.5, 2.0 Hz, 1H, Ar), 7.22 - 7.03 (m, 5H, Ar), 6.87 (s, 1H, Ar), 4.81 (br s, 1H, NHCON), 4.36 (t, *J* = 5.5 Hz, 2H, OCH<sub>2</sub>), 3.72 (t, *J* = 5.5 Hz, 2H, OCH<sub>2</sub>CH<sub>2</sub>), 3.61 (s, 3H, Me), 3.53 (dd, *J* = 9.0, 6.6 Hz, 2H, CH<sub>2</sub>CH<sub>2</sub>NHCON), 3.33 (dd, *J* = 9.1, 6.6 Hz, 2H, CH<sub>2</sub>CH<sub>2</sub>NHCON), 3.14 - 2.93 (m, 4H, CH<sub>2</sub>CH<sub>2</sub>Ph), 2.79 (t, *J* = 7.5 Hz, 2H, TrizCH<sub>2</sub>), 2.37 (t, *J* = 7.4 Hz, 2H, CH<sub>2</sub>COOMe), 2.02 (quin, *J* = 7.5 Hz, 2H, TrizCH<sub>2</sub>CH<sub>2</sub>); <sup>13</sup>C NMR (CDCl<sub>3</sub>, 100 MHz) δ (ppm): 173.8 (COO), 162.8 (NHCON), 160.2 (OC<sub>Ar</sub>), 156.1 (C<sub>Ar</sub>), 156.0 (C<sub>Ar</sub>), 148.2 (C<sub>Ar</sub>), 141.6 (C<sub>Ar</sub>), 138.3 (C<sub>Ar</sub>), 130.0 (CH<sub>Ar</sub>), 128.6 (CH<sub>Ar</sub>), 128.5 (CH<sub>Ar</sub>), 128.4 (CH<sub>Ar</sub>), 126.1 (CH<sub>Ar</sub>), 122.8 (C<sub>Ar</sub>), 119.2 (CH<sub>Ar</sub>), 115.2 (CH<sub>Ar</sub>), 112.4 (CH<sub>Ar</sub>), 104.6 (CH<sub>Ar</sub>), 68.1 (OCH<sub>2</sub>), 51.7 (CH<sub>3</sub>), 46.5 (CH<sub>2</sub>CH<sub>2</sub>NHCON), 43.1 (OCH<sub>2</sub>CH<sub>2</sub>), 38.4 (CH<sub>2</sub>CH<sub>2</sub>NHCON), 35.6 (CH<sub>2</sub>CH<sub>2</sub>Ph), 33.4 (CH<sub>2</sub>CH<sub>2</sub>Ph), 33.4 (CH<sub>2</sub>COOMe), 25.0 (TrizCH<sub>2</sub>CH<sub>2</sub>), 24.6 (TrizCH<sub>2</sub>); HRMS (ES, positive mode) m/z: calculated for C<sub>29</sub>H<sub>32</sub>N<sub>6</sub>O<sub>4</sub>S 560.2206; Found 560.2200 (-1.11 ppm).

**Benzyl-(3-(1-(3-(2-(2-oxoimidazolidin-1-yl)ethoxy)-4-(4-phenethylthiazol-2-yl)phenyl)-1H-1,2,3-triazol-4-yl)propyl)carbamate (11h).** Following the general Hantzsch procedure, thioamide **8d** (325 mg, 0.62 mmol), the commercially available 1-bromo-4-phenylbutan-2-one **10a** (141 mg, 0.62 mmol) in <sup>i</sup>PrOH (30 mL), was stirred at 70 °C for 4 h. After the work-up, residue was purified by flash column chromatography (CH<sub>2</sub>Cl<sub>2</sub>/MeOH, 98:2) to yield **11h** (321 mg, 77%) as a colorless oil. <sup>1</sup>H NMR (CDCl<sub>3</sub>, 400 MHz) δ (ppm): 8.36 (d, *J* = 8.6 Hz, 1H, Ar), 7.85 (s, 1H, Ar), 7.46 (d, *J* = 2.0 Hz, 1H, Ar),

7.26 (dd,  $J = 8.6, 2.0$  Hz, 1H, Ar), 7.24 - 6.97 (m, 10H, Ar), 6.75 (s, 1H, Ar), 5.30 (br s, 1H, NHCbz), 4.93 (s, 2H, NHCOOCH<sub>2</sub>), 4.43 (br s, 1H, NHCON), 4.25 (t,  $J = 6.0$  Hz, 2H, OCH<sub>2</sub>), 3.56 (t,  $J = 6.0$  Hz, 2H, OCH<sub>2</sub>CH<sub>2</sub>), 3.38 (t,  $J = 7.9$  Hz, 2H, CH<sub>2</sub>CH<sub>2</sub>NHCON), 3.15 - 3.05 (m, 4H, CH<sub>2</sub>CH<sub>2</sub>NHCON, CH<sub>2</sub>NHCbz), 3.01 - 2.82 (m, 4H, CH<sub>2</sub>CH<sub>2</sub>Ph), 2.69 (t,  $J = 7.1$  Hz, 2H, TrizCH<sub>2</sub>), 1.79 (quin,  $J = 6.9$  Hz, 2H, TrizCH<sub>2</sub>CH<sub>2</sub>); <sup>13</sup>C NMR (CDCl<sub>3</sub>, 100 MHz) δ (ppm): 162.8 (NHCON), 160.3 (OC<sub>Ar</sub>), 156.7 (C<sub>Ar</sub>), 156.1 (C<sub>Ar</sub>), 155.9 (C<sub>Ar</sub>), 148.0 (C<sub>Ar</sub>), 141.7 (C<sub>Ar</sub>), 138.4 (C<sub>Ar</sub>), 136.7 (C<sub>Ar</sub>), 130.1 (CH<sub>Ar</sub>), 128.7 (CH<sub>Ar</sub>), 128.7 (CH<sub>Ar</sub>), 128.6 (CH<sub>Ar</sub>), 128.5 (C<sub>Ar</sub>), 128.4 (CH<sub>Ar</sub>), 128.3 (CH<sub>Ar</sub>), 126.1 (CH<sub>Ar</sub>), 122.7 (C<sub>Ar</sub>), 119.6 (CH<sub>Ar</sub>), 115.1 (CH<sub>Ar</sub>), 112.4 (CH<sub>Ar</sub>), 104.5 (CH<sub>Ar</sub>), 67.6 (OCH<sub>2</sub>), 66.9 (NHCOOCH<sub>2</sub>), 46.5 (CH<sub>2</sub>CH<sub>2</sub>NHCON), 42.8 (OCH<sub>2</sub>CH<sub>2</sub>), 40.0 (CH<sub>2</sub>NHCbz), 38.4 (CH<sub>2</sub>CH<sub>2</sub>NHCON), 35.7 (CH<sub>2</sub>CH<sub>2</sub>Ph), 33.5 (CH<sub>2</sub>CH<sub>2</sub>Ph), 29.2 (TrizCH<sub>2</sub>CH<sub>2</sub>), 22.5 (TrizCH<sub>2</sub>); HRMS (ES, positive mode) m/z: calculated for C<sub>35</sub>H<sub>37</sub>N<sub>7</sub>O<sub>4</sub>S 651.2628; Found 651.2623 (-0.74 ppm).

***Benzyl-(E)-(3-(1-(4-(4-(2-([1,1'-biphenyl]-4-yl)vinyl)thiazol-2-yl)-3-(2-(2-oxoimidazolidin-1-yl)ethoxy)phenyl)-1H-1,2,3-triazol-4-yl)propyl)carbamate (11i).***

Following the general Hantzsch procedure, thioamide **8d** (281 mg, 0.54 mmol) the α-bromoketone **10c** (1 eq) (162 mg, 0.54 mmol) were reacted for 4 h. The crude was purified by flash column chromatography (CH<sub>2</sub>Cl<sub>2</sub>/MeOH, 98:2) to give **11i** (210 mg, 53%) as a colorless oil. <sup>1</sup>H NMR (CDCl<sub>3</sub>, 400 MHz) δ (ppm): 8.59 (d,  $J = 8.6$  Hz, 1H, Ar), 7.98 (s, 1H, Ar), 7.65 - 7.50 (m, 9H, Ar, ThiazCH=CH), 7.44 - 7.35 (m, 3H, Ar), 7.33 - 7.23 (m, 6H, Ar), 7.13 (d,  $J = 16.1$  Hz, 1H, ThiazCH=CH), 5.41 (br s, 1H, NHCbz), 5.04 (s, 2H, NHCOOCH<sub>2</sub>), 4.51 (br s, 1H, NHCON), 4.38 (t,  $J = 5.8$  Hz, 2H, OCH<sub>2</sub>), 3.69 (t,  $J = 6.1$  Hz, 2H, OCH<sub>2</sub>CH<sub>2</sub>), 3.50 (t,  $J = 7.9$  Hz, 2H, CH<sub>2</sub>CH<sub>2</sub>NHCON), 3.22 - 3.16 (m, 4H, CH<sub>2</sub>CH<sub>2</sub>NHCON, CH<sub>2</sub>NHCbz), 2.81 (t,  $J = 7.1$  Hz, 2H, TrizCH<sub>2</sub>), 1.92 (quin,  $J = 7.3$  Hz, 2H, TrizCH<sub>2</sub>CH<sub>2</sub>); <sup>13</sup>C NMR (CDCl<sub>3</sub>, 100 MHz) δ (ppm): 162.6 (NHCON), 161.0 (OC<sub>Ar</sub>), 156.2 (C<sub>Ar</sub>), 156.1 (C<sub>Ar</sub>), 153.9 (C<sub>Ar</sub>), 148.0 (C<sub>Ar</sub>), 140.8 (C<sub>Ar</sub>), 140.7 (C<sub>Ar</sub>), 138.7 (C<sub>Ar</sub>), 136.6 (C<sub>Ar</sub>), 136.3 (C<sub>Ar</sub>), 131.0 (CH<sub>Ar</sub>), 130.4 (CH<sub>Ar</sub>), 130.2 (CH<sub>Ar</sub>), 128.9 (CH<sub>Ar</sub>), 128.7 (CH<sub>Ar</sub>), 128.4 (CH<sub>Ar</sub>), 128.3 (CH<sub>Ar</sub>), 127.5 (CH<sub>Ar</sub>), 127.3 (CH<sub>Ar</sub>), 127.1 (CH<sub>Ar</sub>), 121.6 (CH<sub>Ar</sub>),

119.7 (CH<sub>Ar</sub>), 117.0 (CH<sub>Ar</sub>), 112.5 (CH<sub>Ar</sub>), 104.4 (CH<sub>Ar</sub>), 67.5 (OCH<sub>2</sub>), 66.9 (NHCOOCH<sub>2</sub>), 46.5 (CH<sub>2</sub>CH<sub>2</sub>NHCON), 42.8 (OCH<sub>2</sub>CH<sub>2</sub>), 40.0 (CH<sub>2</sub>NHCbz), 38.4 (CH<sub>2</sub>CH<sub>2</sub>NHCON), 29.2 (TrizCH<sub>2</sub>CH<sub>2</sub>), 22.5 (TrizCH<sub>2</sub>); HRMS (ES, positive mode) m/z: calculated for C<sub>41</sub>H<sub>39</sub>N<sub>7</sub>O<sub>4</sub>S 725.2784; Found 725.2797 (1.69 ppm).

***Benzyl-(4-(1-(3-methoxy)-4-(4-phenethylthiazol-2-yl)phenyl)-1H-1,2,3-triazol-4-yl)butyl)carbamate (11j)***. Following the general procedure for thiazole synthesis, thioamide **8c** (125 mg, 0.28 mmol) and the commercially available 1-bromo-4-phenylbutan-2-one **10a** (65 mg, 0.28 mmol) were reacted. After the work-up, the final residue was purified by CCTLC on the Chromatotron (CH<sub>2</sub>Cl<sub>2</sub>/MeOH, 99:1) to yield **11j** (105 mg, 63%) as a colorless oil. <sup>1</sup>H NMR (CDCl<sub>3</sub>, 400 MHz) δ (ppm): 8.47 (d, *J* = 8.5 Hz, 1H, Ar), 7.74 (s, 1H, Ar), 7.53 (d, *J* = 2.1 Hz, 1H, Ar), 7.37 - 7.02 (m, 11H, Ar), 6.87 (s, 1H, Ar), 5.02 (s, 2H, NHCOOCH<sub>2</sub>), 4.78 (br s, 1H, NHCbz), 4.03 (s, 3H, OCH<sub>3</sub>), 3.19 (q, *J* = 6.7 Hz, 2H, CH<sub>2</sub>NHCbz), 3.14 - 2.99 (m, 4H, CH<sub>2</sub>CH<sub>2</sub>Ph), 2.76 (t, *J* = 7.5 Hz, 2H, TrizCH<sub>2</sub>), 1.72 (quin, *J* = 7.5 Hz, 2H, TrizCH<sub>2</sub>CH<sub>2</sub>), 1.56 (quin, *J* = 7.1 Hz, 2H, CH<sub>2</sub>CH<sub>2</sub>NHCbz); <sup>13</sup>C NMR (CDCl<sub>3</sub>, 75 MHz) δ (ppm): 160.4 (OC<sub>Ar</sub>), 157.2 (C<sub>Ar</sub>), 156.6 (C<sub>Ar</sub>), 156.0 (NHCOO), 148.8 (C<sub>Ar</sub>), 141.7 (C<sub>Ar</sub>), 138.3 (C<sub>Ar</sub>), 136.7 (C<sub>Ar</sub>), 129.7 (CH<sub>Ar</sub>), 128.6 (CH<sub>Ar</sub>), 128.6 (CH<sub>Ar</sub>), 128.6 (CH<sub>Ar</sub>), 128.5 (CH<sub>Ar</sub>), 128.2 (CH<sub>Ar</sub>), 128.2 (C<sub>Ar</sub>), 126.1 (CH<sub>Ar</sub>), 122.7 (C<sub>Ar</sub>), 119.1 (CH<sub>Ar</sub>), 115.3 (CH<sub>Ar</sub>), 111.9 (C<sub>Ar</sub>), 103.9 (CH<sub>Ar</sub>), 66.8 (NHCOOCH<sub>2</sub>), 56.2 (OCH<sub>3</sub>), 40.9 (CH<sub>2</sub>NHCbz), 35.7 (CH<sub>2</sub>CH<sub>2</sub>Ph), 33.5 (CH<sub>2</sub>CH<sub>2</sub>Ph), 29.6 (CH<sub>2</sub>CH<sub>2</sub>NHCbz), 26.5 (TrizCH<sub>2</sub>CH<sub>2</sub>), 25.3 (TrizCH<sub>2</sub>); HRMS (ES, positive mode) m/z: calculated for C<sub>32</sub>H<sub>33</sub>N<sub>5</sub>O<sub>3</sub>S 567.2304; Found 567.2312 (1.38 ppm).

***Benzyl-(4-(1-(3-methoxy-4-(4-(2-([1,1'-biphenyl]-4-yl)vinyl)thiazol-2-yl)phenyl)-1H-1,2,3-triazol-4-yl)butyl)carbamate (11k)***. Following the general Hantzsch procedure, thioamide **8c** (292 mg, 0.66 mmol) and α-bromoketone **10c** (200 mg, 0.66 mmol) were reacted for 5h. The final residue was purified by CCTLC on the Chromatotron (CH<sub>2</sub>Cl<sub>2</sub>/MeOH, 98:2) to give **11k** (250 mg, 57%) as a yellow oil. <sup>1</sup>H NMR (CDCl<sub>3</sub>, 400

MHz)  $\delta$  (ppm): 8.63 (d,  $J = 8.5$  Hz, 1H, Ar), 7.78 (s, 1H, Ar), 7.63 - 7.53 (m, 8H, Ar, ThiazCH=CH), 7.41 (t,  $J = 7.6$  Hz, 2H, Ar), 7.34 - 7.21 (m, 8H, Ar), 7.17 (d,  $J = 16.0$  Hz, 1H, ThiazCH=CH), 5.06 (s, 2H, NHCOOCH<sub>2</sub>), 4.83 (br s, 1H, NHCbz), 4.08 (s, 3H, OCH<sub>3</sub>), 3.22 (q,  $J = 6.7$  Hz, 2H, CH<sub>2</sub>NHCbz), 2.79 (t,  $J = 7.5$  Hz, 2H, TrizCH<sub>2</sub>), 1.76 (quin,  $J = 7.5$  Hz, 2H, TrizCH<sub>2</sub>CH<sub>2</sub>), 1.59 (quin,  $J = 7.1$  Hz, 2H, CH<sub>2</sub>CH<sub>2</sub>NHCbz); <sup>13</sup>C NMR (CDCl<sub>3</sub>, 100 MHz)  $\delta$  (ppm): 161.1 (NHCON), 157.4 (OC<sub>Ar</sub>), 156.6 (NHCOO), 153.3 (C<sub>Ar</sub>), 148.8 (C<sub>Ar</sub>), 140.7 (C<sub>Ar</sub>), 140.6 (C<sub>Ar</sub>), 138.6 (CH<sub>Ar</sub>), 136.7 (CH<sub>Ar</sub>), 136.3 (CH<sub>Ar</sub>), 130.8 (CH<sub>Ar</sub>), 129.9 (CH<sub>Ar</sub>), 128.9 (CH<sub>Ar</sub>), 128.6 (CH<sub>Ar</sub>), 128.2 (CH<sub>Ar</sub>), 128.2 (CH<sub>Ar</sub>), 127.5 (CH<sub>Ar</sub>), 127.2 (CH<sub>Ar</sub>), 127.0 (CH<sub>Ar</sub>), 122.4 (C<sub>Ar</sub>), 121.7 (CH<sub>Ar</sub>), 119.1 (C<sub>Ar</sub>), 117.2 (C<sub>Ar</sub>), 111.9 (CH<sub>Ar</sub>), 103.8 (CH<sub>Ar</sub>), 66.7 (NHCOOCH<sub>2</sub>), 56.2 (OCH<sub>3</sub>), 40.9 (CH<sub>2</sub>NHCbz), 29.6 (CH<sub>2</sub>CH<sub>2</sub>NHCbz), 26.5 (TrizCH<sub>2</sub>CH<sub>2</sub>), 25.3 (TrizCH<sub>2</sub>); HRMS (ES, positive mode) m/z: calculated for C<sub>38</sub>H<sub>35</sub>N<sub>5</sub>O<sub>3</sub>S 641.2461; Found 641.2474 (2.07 ppm).

***Tert-butyl-(4-(1-(4-(4-isopropoxythiazol-2-yl)-3-(2-(2-oxoimidazolidin-1-yl)ethoxy)phenyl)-1H-1,2,3-triazol-4-yl)butyl)carbamate and 1-(2-(5-(4-(4-Aminobutyl)-1H-1,2,3-triazol-1-yl)-2-(4-isopropoxythiazol-2-yl)phenoxy)ethyl)imidazolidin-2-one chloride (11I and 12I).*** Following the general Hantzsch procedure, thioamide **8a** (87 mg, 0.17 mmol) and isopropyl chloroacetate (0.25 mL, 1.99 mmol) in <sup>i</sup>PrOH (8 mL) were reacted. Work-up and purification of the crude by flash column chromatography (from CH<sub>2</sub>Cl<sub>2</sub>/MeOH, 97:3 to CH<sub>2</sub>Cl<sub>2</sub>/MeOH/NH<sub>3</sub>, 85:14:1) gave, from the fastest moving band, compound **11I** (27 mg, 26%) as a colorless oil. <sup>1</sup>H NMR (DMSO-d<sub>6</sub>, 400 MHz)  $\delta$  (ppm): 8.72 (s, 1H, Ar), 8.34 (d,  $J = 8.6$  Hz, 1H, Ar), 7.73 (d,  $J = 1.6$  Hz, 1H, Ar), 7.66 (dd,  $J = 8.6, 1.8$  Hz, 1H, Ar), 6.81 (t,  $J = 1.9$  Hz, 1H, Ar), 6.64 (br s, 1H, NHCON), 6.56 (br s, 1H, NHBoc), 4.73 (quin,  $J = 6.1$  Hz, 1H, OCH(CH<sub>3</sub>)<sub>2</sub>), 4.47 (t,  $J = 5.6$  Hz, 2H, OCH<sub>2</sub>), 3.63 (t,  $J = 5.6$  Hz, 2H, OCH<sub>2</sub>CH<sub>2</sub>), 3.49 (t,  $J = 7.8$  Hz, 2H, CH<sub>2</sub>CH<sub>2</sub>NHCON), 3.23 (t,  $J = 7.9$  Hz, 2H, CH<sub>2</sub>CH<sub>2</sub>NHCON), 3.01 - 2.91 (m, 2H, CH<sub>2</sub>NHBoc), 2.75 - 2.68 (m, 2H, TrizCH<sub>2</sub>), 1.71 - 1.60 (m, 2H, TrizCH<sub>2</sub>CH<sub>2</sub>), 1.53 - 1.41 (m, 2H, CH<sub>2</sub>CH<sub>2</sub>NHBoc), 1.36 (s, 9H, C(CH<sub>3</sub>)<sub>3</sub>), 1.32 (d,  $J = 6.1$  Hz, 6H, CH(CH<sub>3</sub>)<sub>2</sub>);

$^{13}\text{C}$  NMR (DMSO- $d_6$ , 100 MHz)  $\delta$  (ppm): 162.2 (NHCON), 156.7 ( $\text{OC}_{\text{Ar}}$ ), 155.9 ( $\text{OC}_{\text{Ar}}$ ), 155.6 (NHCOO), 148.2 ( $\text{C}_{\text{Ar}}$ ), 137.9 ( $\text{C}_{\text{Ar}}$ ), 128.6 ( $\text{CH}_{\text{Ar}}$ ), 120.9 ( $\text{CH}_{\text{Ar}}$ ), 120.3 ( $\text{C}_{\text{Ar}}$ ), 112.0 ( $\text{CH}_{\text{Ar}}$ ), 104.3 ( $\text{CH}_{\text{Ar}}$ ), 93.1 ( $\text{CH}_{\text{Ar}}$ ), 77.4 ( $\text{OC}(\text{CH}_3)_3$ ), 71.8 ( $\text{OCH}(\text{CH}_3)_2$ ), 67.6 ( $\text{OCH}_2$ ), 45.3 ( $\text{CH}_2\text{CH}_2\text{NHCON}$ ), 42.4 ( $\text{OCH}_2\text{CH}_2$ ), 37.6 ( $\text{CH}_2\text{CH}_2\text{NHCON}$ ), 29.0 ( $\text{CH}_2\text{CH}_2\text{NHBoc}$ ), 28.3 ( $\text{C}(\text{CH}_3)_3$ ), 26.1 (Triz $\text{CH}_2\text{CH}_2$ ), 24.7 (Triz $\text{CH}_2$ ), 21.9 ( $\text{CH}(\text{CH}_3)_2$ ); MS (ESI, positive mode)  $m/z$ : 1193.5 [ $2\text{M}+\text{Na}$ ] $^+$ , 608.3 [ $\text{M}+\text{Na}$ ] $^+$ , 586.3 [ $\text{M}+\text{H}$ ] $^+$ .

The slowest moving band gave the deprotected compound **12l** (43 mg, 47%) as a yellow oil.  $^1\text{H}$  NMR (DMSO- $d_6$ , 400 MHz)  $\delta$  (ppm): 8.83 (s, 1H, Ar), 8.30 (d,  $J = 8.6$  Hz, 1H, Ar), 7.75 (s, 1H, Ar), 7.65 (d,  $J = 8.3$  Hz, 1H, Ar), 6.60 (s, 1H, Ar), 6.42 (br s, 1H, NHCON), 4.73 (quin,  $J = 6.1$  Hz, 1H,  $\text{OCH}(\text{CH}_3)_2$ ), 4.50 - 4.40 (m, 2H,  $\text{OCH}_2$ ), 3.65 - 3.55 (m, 2H,  $\text{OCH}_2\text{CH}_2$ ), 3.48 (t,  $J = 7.4$  Hz,  $\text{CH}_2\text{CH}_2\text{NHCON}$ ), 3.21 (t,  $J = 7.4$  Hz, 2H,  $\text{CH}_2\text{CH}_2\text{NHCON}$ ), 2.79 - 2.62 (m, 4H, Triz $\text{CH}_2$ ,  $\text{CH}_2\text{NH}_3^+$ ), 1.75 - 1.65 (m, 2H, Triz $\text{CH}_2\text{CH}_2$ ), 1.63 - 1.53 (m, 2H,  $\text{CH}_2\text{CH}_2\text{NH}_3^+$ ), 1.31 (d,  $J = 6.1$  Hz, 6H,  $\text{CH}_3$ );  $^{13}\text{C}$  NMR (DMSO- $d_6$ , 100 MHz)  $\delta$  (ppm): 162.1 (NHCON), 156.7 ( $\text{OC}_{\text{Ar}}$ ), 155.9 ( $\text{OC}_{\text{Ar}}$ ), 148.0 ( $\text{C}_{\text{Ar}}$ ), 137.9 ( $\text{C}_{\text{Ar}}$ ), 128.5 ( $\text{CH}_{\text{Ar}}$ ), 120.8 ( $\text{CH}_{\text{Ar}}$ ), 120.5 ( $\text{C}_{\text{Ar}}$ ), 111.9 ( $\text{CH}_{\text{Ar}}$ ), 104.2 ( $\text{CH}_{\text{Ar}}$ ), 93.0 ( $\text{CH}_{\text{Ar}}$ ), 71.8 ( $\text{OCH}_2$ ), 67.5 ( $\text{OCH}(\text{CH}_3)_2$ ), 45.3 ( $\text{CH}_2\text{CH}_2\text{NHCON}$ ), 42.4 ( $\text{OCH}_2\text{CH}_2$ ), 37.6 ( $\text{CH}_2\text{CH}_2\text{NHCON}$ ), 28.6 ( $\text{CH}_2\text{CH}_2\text{NH}_3^+$ ), 25.8 (Triz $\text{CH}_2\text{CH}_2$ ), 24.6 (Triz $\text{CH}_2$ ), 21.9 ( $\text{CH}_3$ ); HPLC (Gradient A, Agilent):  $R_t = 3.5$  min; HRMS (ES, positive mode)  $m/z$ : calculated for  $\text{C}_{23}\text{H}_{31}\text{N}_7\text{O}_3\text{S}$  485.2203; Found 485.2209 (-1.19 ppm); Anal. Calc. for  $\text{C}_{23}\text{H}_{31}\text{N}_7\text{O}_3\text{S}\cdot\text{HCl}$ : C. 52.92; H. 6.18; N. 18.78; S. 6.14; Found: C. 53.15; H. 6.16; N. 19.05; S. 5.65.

***Tert-butyl-(4-(1-(4-(4-neopentylthiazol-2-yl)-3-(2-(2-oxoimidazolidin-1-yl)ethoxy)phenyl)-1H-1,2,3-triazol-4-yl)butyl)carbamate and 1-(2-(5-(4-(4-aminobutyl)-1H-1,2,3-triazol-1-yl)-2-(4-neopentylthiazol-2-yl)phenoxy)ethyl)imidazolidin-2-one bromide (11m and 12m)***. Following the general Hantzsch procedure, thioamide **8a** (50 mg, 0.10 mmol) was reacted with  $\alpha$ -bromoketone **10m** (77 mg, 0.40 mmol). Purification by flash column chromatography (from  $\text{CH}_2\text{Cl}_2/\text{MeOH}$ , 96:4 to  $\text{CH}_2\text{Cl}_2/\text{MeOH}/\text{NH}_3$ , 85:14:1) gave, from the fastest moving band,



compound **11m** (27 mg, 46%) as a colorless oil.  $^1\text{H}$  NMR ( $\text{CD}_3\text{OD}$ , 400 MHz)  $\delta$  (ppm): 8.45 (s, 1H, Ar), 8.44 (d,  $J = 8.6$  Hz, 1H, Ar), 7.72 (d,  $J = 2.0$  Hz, 1H, Ar), 7.58 (dd,  $J = 8.6$ , 2.0 Hz, 1H, Ar), 7.21 (s, 1H, Ar), 4.50 (t,  $J = 5.5$  Hz, 2H,  $\text{OCH}_2$ ), 3.77 (t,  $J = 5.5$  Hz, 2H,  $\text{OCH}_2\text{CH}_2$ ), 3.62 (dd,  $J = 9.2$ , 6.9 Hz, 2H,  $\text{CH}_2\text{CH}_2\text{NHCON}$ ), 3.38 (dd,  $J = 9.3$ , 6.9 Hz, 2H,  $\text{CH}_2\text{CH}_2\text{NHCON}$ ), 3.10 (t,  $J = 6.9$  Hz, 2H,  $\text{CH}_2\text{NHBoc}$ ), 2.82 (t,  $J = 7.5$  Hz, 2H, Triz $\text{CH}_2$ ), 2.75 (s, 2H,  $\text{CH}_2\text{-}^t\text{Bu}$ ), 1.77 (quin,  $J = 7.6$  Hz, 2H, Triz $\text{CH}_2\text{CH}_2$ ), 1.59 (quin,  $J = 7.6$  Hz, 2H,  $\text{CH}_2\text{CH}_2\text{NHBoc}$ ), 1.43 (s, 9H,  $\text{OC}(\text{CH}_3)_3$ ), 1.00 (s, 9H,  $\text{CH}_2\text{C}(\text{CH}_3)_3$ );  $^{13}\text{C}$  NMR ( $\text{CD}_3\text{OD}$ , 75 MHz)  $\delta$  (ppm): 165.1 (NHCON), 161.1 ( $\text{OC}_{\text{Ar}}$ ), 157.4 ( $\text{C}_{\text{Ar}}$ ), 155.8 ( $\text{C}_{\text{Ar}}$ ), 150.0 ( $\text{C}_{\text{Ar}}$ ), 139.7 ( $\text{C}_{\text{Ar}}$ ), 130.8 ( $\text{CH}_{\text{Ar}}$ ), 123.9 ( $\text{C}_{\text{Ar}}$ ), 121.5 ( $\text{CH}_{\text{Ar}}$ ), 118.4 ( $\text{CH}_{\text{Ar}}$ ), 113.6 ( $\text{CH}_{\text{Ar}}$ ), 105.8 ( $\text{CH}_{\text{Ar}}$ ), 79.9 ( $\text{OC}(\text{CH}_3)_3$ ), 68.4 ( $\text{OCH}_2$ ), 46.9 ( $\text{CH}_2\text{CH}_2\text{NHCON}$ ), 45.7 ( $\text{CH}_2\text{-}^t\text{Bu}$ ), 43.9 ( $\text{OCH}_2\text{CH}_2$ ), 41.0 ( $\text{CH}_2\text{NHBoc}$ ), 39.3 ( $\text{CH}_2\text{CH}_2\text{NHCON}$ ), 32.4 ( $\text{CH}_2\text{C}(\text{CH}_3)_3$ ), 30.4 ( $\text{CH}_2\text{CH}_2\text{NHBoc}$ ), 30.0 ( $\text{CH}_2\text{C}(\text{CH}_3)_3$ ), 28.8 ( $\text{OC}(\text{CH}_3)_3$ ), 27.6 (Triz $\text{CH}_2\text{CH}_2$ ), 26.0 (Triz $\text{CH}_2$ ); HRMS (ES, positive mode)  $m/z$ : calculated for  $\text{C}_{30}\text{H}_{43}\text{N}_7\text{O}_4\text{S}$  597.3097; Found 597.3096 (-0.18 ppm).

The slowest moving band afforded 17 mg (30%) of a yellow oil identified as **12m**.

$^1\text{H}$  NMR ( $\text{CD}_3\text{OD}$ , 400 MHz)  $\delta$  (ppm): 8.46 (s, 1H, Ar), 8.46 (d,  $J = 8.6$  Hz, 1H, Ar), 7.73 (d,  $J = 2.1$  Hz, 1H, Ar), 7.59 (dd,  $J = 8.6$ , 2.1 Hz, 1H, Ar), 7.22 (s, 1H, Ar), 4.50 (t,  $J = 5.5$  Hz, 2H,  $\text{OCH}_2$ ), 3.77 (t,  $J = 5.5$  Hz, 2H,  $\text{OCH}_2\text{CH}_2$ ), 3.62 (dd,  $J = 9.2$ , 6.9 Hz, 2H,  $\text{CH}_2\text{CH}_2\text{NHCON}$ ), 3.38 (dd,  $J = 9.3$ , 6.9 Hz, 2H,  $\text{CH}_2\text{CH}_2\text{NHCON}$ ), 2.83 (t,  $J = 7.5$  Hz, 2H,  $\text{CH}_2\text{NH}_3^+$ ), 2.75 (s, 2H,  $\text{CH}_2\text{-}^t\text{Bu}$ ), 2.70 (t,  $J = 7.2$  Hz, 2H, Triz $\text{CH}_2$ ), 1.79 (quin,  $J = 7.6$  Hz, 2H, Triz $\text{CH}_2\text{CH}_2$ ), 1.58 (quin,  $J = 7.6$  Hz, 2H,  $\text{CH}_2\text{CH}_2\text{NH}_3^+$ ), 1.00 (s, 9H,  $\text{CH}_3$ );  $^{13}\text{C}$  NMR ( $\text{CD}_3\text{OD}$ , 75 MHz)  $\delta$  (ppm): 165.1 (NHCON), 161.1 ( $\text{OC}_{\text{Ar}}$ ), 157.4 ( $\text{C}_{\text{Ar}}$ ), 155.8 ( $\text{C}_{\text{Ar}}$ ), 150.1 ( $\text{C}_{\text{Ar}}$ ), 139.7 ( $\text{C}_{\text{Ar}}$ ), 130.8 ( $\text{CH}_{\text{Ar}}$ ), 123.9 ( $\text{C}_{\text{Ar}}$ ), 121.5 ( $\text{CH}_{\text{Ar}}$ ), 118.4 ( $\text{CH}_{\text{Ar}}$ ), 113.6 ( $\text{CH}_{\text{Ar}}$ ), 105.7 ( $\text{CH}_{\text{Ar}}$ ), 68.4 ( $\text{OCH}_2$ ), 46.9 ( $\text{CH}_2\text{CH}_2\text{NHCON}$ ), 45.7 ( $\text{CH}_2\text{-}^t\text{Bu}$ ), 43.9 ( $\text{OCH}_2\text{CH}_2$ ), 42.2 ( $\text{CH}_2\text{NH}_3^+$ ), 39.3 ( $\text{CH}_2\text{CH}_2\text{NHCON}$ ), 33.2 ( $\text{CH}_2\text{CH}_2\text{NH}_3^+$ ), 32.4 ( $\text{CH}_2\text{C}(\text{CH}_3)_3$ ), 30.0 ( $\text{C}(\text{CH}_3)_3$ ), 27.7 (Triz $\text{CH}_2\text{CH}_2$ ), 26.1 (Triz $\text{CH}_2$ ); HPLC (*Gradient A, Agilent*):  $R_t = 4.1$  min; HRMS (ES, positive mode)  $m/z$ : calculated for  $\text{C}_{25}\text{H}_{35}\text{N}_7\text{O}_2\text{S}$  497.2573; Found 497.2572 (-0.17 ppm); Anal. Calc. for  $\text{C}_{25}\text{H}_{35}\text{N}_7\text{O}_2\text{S}\cdot\text{HBr}$ : C. 51.90; H. 6.27; N. 16.95; S. 5.54; Found: C. 52.27; H. 6.17; N. 16.79; S. 5.65.

**Benzyl-(4-(1-(3-(2-(2-oxoimidazolidin-1-yl)ethoxy)-4-(4-phenylthiazol-2-yl)phenyl)-1H-1,2,3-triazol-4-yl)butyl)carbamate (11n).** Following the general Hantzsch procedure, the thioamide **8b** (100 mg, 0.19 mmol) and the commercially available 1-bromo-2-phenylethan-2-one (37 mg, 0.19 mmol) were reacted for 3 h. After the work-up, the residue was purified by flash column chromatography (CH<sub>2</sub>Cl<sub>2</sub>/MeOH, 95:5) to give **11n** (104 mg, 86%) as a colorless oil. <sup>1</sup>H NMR (DMSO-d<sub>6</sub>, 400 MHz) δ (ppm): 8.74 (s, 1H, Ar), 8.60 (d, *J* = 8.6 Hz, 1H, Ar), 8.21 (s, 1H, Ar), 8.10 (dd, *J* = 7.7, 2.0 Hz, 2H, Ar), 8.09 (s, 1H, Ar), 7.77 (d, *J* = 1.9 Hz, 1H, Ar), 7.72 (dd, *J* = 8.6, 1.9 Hz, 1H, Ar), 7.48 (t, *J* = 7.8 Hz, 1H, Ar), 7.42 - 7.24 (m, 6H, Ar), 6.41 (br s, 1H, NHCbz), 5.01 (s, 2H, NHCOOCH<sub>2</sub>), 4.50 (t, *J* = 5.7 Hz, 2H, OCH<sub>2</sub>), 3.67 (t, *J* = 5.6 Hz, 2H, OCH<sub>2</sub>CH<sub>2</sub>), 3.51 (dd, *J* = 9.0, 6.6 Hz, 2H, CH<sub>2</sub>CH<sub>2</sub>NHCON), 3.23 (dd, *J* = 9.0, 6.6 Hz, 2H, CH<sub>2</sub>CH<sub>2</sub>NHCON), 3.07 (q, *J* = 6.6 Hz, 2H, CH<sub>2</sub>NHCbz), 2.74 (t, *J* = 7.5 Hz, 2H, TrizCH<sub>2</sub>), 1.70 (quin, *J* = 7.5 Hz, 2H, TrizCH<sub>2</sub>CH<sub>2</sub>), 1.51 (quin, *J* = 6.6 Hz, 2H, CH<sub>2</sub>CH<sub>2</sub>NHCbz); <sup>13</sup>C NMR (DMSO-d<sub>6</sub>, 75 MHz) δ (ppm): 162.2 (NHCON), 162.1 (OC<sub>Ar</sub>), 160.1 (C<sub>Ar</sub>), 156.1 (C<sub>Ar</sub>), 155.8 (C<sub>Ar</sub>), 153.4 (C<sub>Ar</sub>), 148.1 (C<sub>Ar</sub>), 138.3 (C<sub>Ar</sub>), 137.3 (C<sub>Ar</sub>), 134.1 (CH<sub>Ar</sub>), 129.2 (CH<sub>Ar</sub>), 128.8 (CH<sub>Ar</sub>), 128.3 (CH<sub>Ar</sub>), 128.1 (CH<sub>Ar</sub>), 127.7 (CH<sub>Ar</sub>), 126.2 (C<sub>Ar</sub>), 121.1 (CH<sub>Ar</sub>), 120.3 (CH<sub>Ar</sub>), 115.8 (CH<sub>Ar</sub>), 112.1 (CH<sub>Ar</sub>), 104.3 (CH<sub>Ar</sub>), 67.6 (OCH<sub>2</sub>), 65.1 (NHCOOCH<sub>2</sub>), 45.3 (CH<sub>2</sub>CH<sub>2</sub>NHCON), 42.4 (OCH<sub>2</sub>CH<sub>2</sub>), 37.6 (CH<sub>2</sub>CH<sub>2</sub>NHCON), 28.9 (CH<sub>2</sub>CH<sub>2</sub>NHCbz), 26.0 (TrizCH<sub>2</sub>CH<sub>2</sub>), 24.7 (TrizCH<sub>2</sub>); HRMS (ES, positive mode) *m/z*: calculated for C<sub>34</sub>H<sub>35</sub>N<sub>7</sub>O<sub>4</sub>S 637.2471; Found 637.2474 (0.49 ppm).

**Tert-Butyl-(4-(1-(4-(4-benzylthiazol-2-yl)-3-(2-(2-oxoimidazolidin-1-yl)ethoxy)phenyl)-1H-1,2,3-triazol-4-yl)butyl)carbamate and 1-(2-(5-(4-(4-Aminobutyl)-1H-1,2,3-triazol-1-yl)-2-(4-benzylthiazol-2-yl)phenoxy)ethyl)imidazolidin-2-one chloride (11o and 12o).** According to the general Hantzsch procedure, thioamide **8a** (74 mg, 0.15 mmol) and 1-chloro-3-benzylpropan-2-one (100 mg, 0.60 mmol) were reacted. The final crude was purified by flash column chromatography (from CH<sub>2</sub>Cl<sub>2</sub>/MeOH, 95:5 to CH<sub>2</sub>Cl<sub>2</sub>/MeOH/NH<sub>3</sub>, 85:14:1) to give, from the fastest moving band compound **11o** (41 mg, 44%) as a

colorless oil.  $^1\text{H}$  NMR (DMSO- $d_6$ , 300 MHz)  $\delta$  (ppm): 8.72 (s, 1H, Ar), 8.40 (d,  $J$  = 8.6 Hz, 1H, Ar), 7.73 (d,  $J$  = 2.0 Hz, 1H, Ar), 7.66 (dd,  $J$  = 8.4, 2.0 Hz, 1H, Ar), 7.40 - 7.14 (m, 6H, Ar), 6.80 (br s, 1H, NHCON), 6.39 (br s, 1H, NHBoc), 4.46 (t,  $J$  = 5.5 Hz, 2H, OCH $_2$ ), 4.14 (s, 2H, CH $_2$ Ph), 3.62 (t,  $J$  = 5.5 Hz, 2H, OCH $_2$ CH $_2$ ), 3.53 - 3.42 (m, 2H, CH $_2$ CH $_2$ NHCON), 3.25 - 3.15 (m, 2H, CH $_2$ CH $_2$ NHCON), 3.00 - 2.90 (m, 2H, CH $_2$ NHBoc), 2.72 (t,  $J$  = 7.6 Hz, 2H, TrizCH $_2$ ), 1.75 - 1.60 (m, 2H, TrizCH $_2$ CH $_2$ ), 1.52 - 1.43 (m, 2H, CH $_2$ CH $_2$ Boc), 1.36 (s, 9H, OC(CH $_3$ ) $_3$ ); HRMS (ES, positive mode)  $m/z$ : calculated for C $_{32}$ H $_{39}$ N $_7$ O $_4$ S 617.2784; Found 617.2775 (-1.44 ppm).

The slowest moving band afforded 44 mg (55%) of a yellow oil that was identified as **12o**.  $^1\text{H}$  NMR (DMSO- $d_6$ , 300 MHz)  $\delta$  (ppm): 8.73 (s, 1H, Ar), 8.39 (d,  $J$  = 8.6 Hz, 1H, Ar), 7.74 (s, 1H, Ar), 7.66 (d,  $J$  = 8.4 Hz, 1H, Ar), 7.55 - 7.05 (m, 5H, Ar), 7.19 (s, 1H, Ar), 6.43 (br s, 1H, NHCON), 4.46 (t,  $J$  = 5.4 Hz, 2H, OCH $_2$ ), 4.14 (s, 2H, CH $_2$ Ph), 3.62 (t,  $J$  = 5.4 Hz, 2H, OCH $_2$ CH $_2$ ), 3.53 - 3.42 (m, 2H, CH $_2$ CH $_2$ NHCON), 3.25 - 3.15 (m, 2H, CH $_2$ CH $_2$ NHCON), 2.99 - 2.88 (m, 2H, CH $_2$ NH $_3^+$ ), 2.75 - 2.67 (m, 2H, TrizCH $_2$ ), 1.75 - 1.60 (m, 2H, TrizCH $_2$ CH $_2$ ), 1.48 - 1.37 (m, 2H, CH $_2$ CH $_2$ NH $_3^+$ );  $^{13}\text{C}$  NMR (DMSO- $d_6$ , 75 MHz)  $\delta$  (ppm): 162.1 (NHCON), 155.6 (C $_{Ar}$ ), 155.0 (C $_{Ar}$ ), 148.3 (C $_{Ar}$ ), 139.6 (C $_{Ar}$ ), 138.1 (C $_{Ar}$ ), 128.9 (CH $_{Ar}$ ), 128.8 (CH $_{Ar}$ ), 128.4 (CH $_{Ar}$ ), 126.1 (CH $_{Ar}$ ), 121.1 (C $_{Ar}$ ), 120.0 (CH $_{Ar}$ ), 116.7 (CH $_{Ar}$ ), 112.0 (CH $_{Ar}$ ), 104.3 (CH $_{Ar}$ ), 67.6 (OCH $_2$ ), 45.2 (CH $_2$ CH $_2$ NHCON), 42.3 (OCH $_2$ CH $_2$ ), 40.4 (CH $_2$ NH $_3^+$ ), 37.5 (CH $_2$ CH $_2$ NHCON), 37.0 (CH $_2$ Ph), 30.7 (CH $_2$ CH $_2$ NH $_3^+$ ), 29.7 (TrizCH $_2$ CH $_2$ ), 26.1 (TrizCH $_2$ ); HPLC (*Gradient A, Agilent*):  $R_t$  = 4.4 min; HRMS (ES, positive mode)  $m/z$ : calculated for C $_{27}$ H $_{31}$ N $_7$ O $_2$ S 517.2260; Found 517.2256 (-0.69 ppm); Anal. Calc. for C $_{27}$ H $_{31}$ N $_7$ O $_2$ S.HCl: C. 58.53; H. 5.82; N. 17.69; S. 5.79; Found: C. 59.02; H. 6.15; N. 17.63; S. 6.16.

***Benzyl-(E)-(4-(1-(3-(2-(2-oxoimidazolidin-1-yl)ethoxy)-4-(4-(3-phenylprop-1-en-1-yl)thiazol-2-yl)phenyl)-1H-1,2,3-triazol-4-yl)butyl)carbamate (11p)***. Following the general Hantzsch procedure, thioamide **8b** (250 mg, 0.47 mmol) and  $\alpha$ -bromoketone **10p** (112 mg, 0.47 mmol) were reacted. The final residue was purified by flash column

chromatography (CH<sub>2</sub>Cl<sub>2</sub>/MeOH, 97:3) to give **11p** (153 mg, 48%) as a yellow oil. <sup>1</sup>H NMR (CDCl<sub>3</sub>, 400 MHz) δ (ppm): 8.55 (d, *J* = 8.5 Hz, 1H, Ar), 7.87 (s, 1H, Ar), 7.57 (d, *J* = 1.9 Hz, 1H, Ar), 7.40 - 7.18 (m, 11H, Ar), 7.10 (s, 1H, Ar), 6.86 (dt, *J* = 15.5, 6.9 Hz, 1H, CH<sub>2</sub>CH=CH), 6.50 (dt, *J* = 15.5, 1.6 Hz, 1H, CH<sub>2</sub>CH=CH), 5.05 (br s, 1H, NHCbz), 5.08 (s, 2H, NHCOOCH<sub>2</sub>), 4.73 (br s, 1H, NHCON), 4.41 (t, *J* = 5.7 Hz, 2H, OCH<sub>2</sub>), 3.75 (t, *J* = 5.7 Hz, 2H, OCH<sub>2</sub>CH<sub>2</sub>), 3.61 - 3.52 (m, 4H, CH<sub>2</sub>CH<sub>2</sub>NHCON, CH<sub>2</sub>CH=CH), 3.32 (t, *J* = 7.9 Hz, 2H, CH<sub>2</sub>CH<sub>2</sub>NHCON), 3.25 (q, *J* = 6.7 Hz, 2H, CH<sub>2</sub>NHCbz), 2.82 (t, *J* = 7.3 Hz, 2H, TrizCH<sub>2</sub>), 1.77 (quin, *J* = 7.5 Hz, 2H, TrizCH<sub>2</sub>CH<sub>2</sub>), 1.63 (quin, *J* = 7.3 Hz, 2H, CH<sub>2</sub>CH<sub>2</sub>NHCbz); <sup>13</sup>C NMR (CDCl<sub>3</sub>, 100 MHz) δ (ppm): 162.7 (NHCON), 160.6 (OAr), 156.6 (CAr), 156.1 (CAr), 153.3 (CAr), 148.8 (CAr), 140.0 (CAr), 138.5 (CAr), 136.7 (CAr), 132.6 (CHAr), 130.2 (CHAr), 128.9 (CHAr), 128.6 (CHAr), 128.2 (CHAr), 126.3 (CHAr), 124.3 (CHAr), 122.5 (CAr), 119.1 (CHAr), 115.1 (CHAr), 112.4 (CHAr), 104.5 (CHAr), 67.8 (OCH<sub>2</sub>), 66.7 (NHCOOCH<sub>2</sub>), 46.4 (CH<sub>2</sub>CH<sub>2</sub>NHCON), 43.0 (OCH<sub>2</sub>CH<sub>2</sub>), 40.9 (CH<sub>2</sub>NHCbz), 39.3 (CH<sub>2</sub>CH<sub>2</sub>NHCON), 38.4 (PhCH<sub>2</sub>CH=CH), 29.4 (CH<sub>2</sub>CH<sub>2</sub>NHCbz), 26.4 (TrizCH<sub>2</sub>CH<sub>2</sub>), 25.2 (TrizCH<sub>2</sub>); HRMS (ES, positive mode) *m/z*: calculated for C<sub>37</sub>H<sub>39</sub>N<sub>7</sub>O<sub>4</sub>S 677.2784; Found 677.2781 (-0.53 ppm).

***Benzyl-(E)-(4-(1-(3-(2-(2-oxoimidazolidin-1-yl)ethoxy)-4-(4-(2-(quinolin-6-***

*yl)vinyl)thiazol-2-yl)phenyl)-1H-1,2,3-triazol-4-yl)butyl)carbamate (11q).* According to the general Hantzsch procedure, thioamide **8b** (200 mg, 0.38 mmol) and the α-bromoketone crude **10q** (0.38 mmol) were reacted. After the work-up, the final residue was purified by CCTLC on the Chromatotron (CH<sub>2</sub>Cl<sub>2</sub>/MeOH, 90:10) to afford **11q** (230 mg, 80%) as an orange oil. <sup>1</sup>H NMR (CDCl<sub>3</sub>, 400 MHz) δ (ppm): 8.79 (d, *J* = 4.2 Hz, 1H, Ar), 8.59 (d, *J* = 8.6 Hz, 1H, Ar), 8.06 (dd, *J* = 6.5, 2.2 Hz, 1H, Ar), 8.01 (d, *J* = 8.8 Hz, 1H, Ar), 7.91 (dd, *J* = 8.9, 2.0 Hz, 1H, Ar), 7.83 (s, 1H, Ar), 7.80 (s, 1H, Ar), 7.69 (d, *J* = 15.9 Hz, 1H, ThiazCH=CH), 7.53 (s, 1H, Ar), 7.37 (d, *J* = 8.6 Hz, 1H, Ar), 7.34 - 7.15 (m, 8H, Ar, ThiazCH=CH), 5.06 (br s, 1H, NHCbz), 5.02 (s, 2H, NHCOOCH<sub>2</sub>), 4.67 (br s, 1H, NHCON), 4.37 (t, *J* = 5.8 Hz, 2H, OCH<sub>2</sub>), 3.71 (t, *J* = 5.9 Hz, 2H, OCH<sub>2</sub>CH<sub>2</sub>), 3.52 (dd,

$J = 9.0, 6.7$  Hz, 2H,  $\text{CH}_2\text{CH}_2\text{NHCON}$ ), 3.28 (t,  $J = 8.0$  Hz, 2H,  $\text{CH}_2\text{CH}_2\text{NHCON}$ ), 3.20 (q,  $J = 6.6$  Hz, 2H,  $\text{CH}_2\text{NHCbz}$ ), 2.77 (t,  $J = 7.4$  Hz, 2H, Triz $\text{CH}_2$ ), 1.72 (quin,  $J = 7.6$  Hz, 2H, Triz $\text{CH}_2\text{CH}_2$ ), 1.57 (quin,  $J = 7.4$  Hz, 2H,  $\text{CH}_2\text{CH}_2\text{NHCbz}$ );  $^{13}\text{C}$  NMR ( $\text{CDCl}_3$ , 100 MHz)  $\delta$  (ppm): 162.7 (NHCON), 161.1 ( $\text{OC}_{\text{Ar}}$ ), 156.6 ( $\text{C}_{\text{Ar}}$ ), 156.2 ( $\text{C}_{\text{Ar}}$ ), 153.1 (NHCOO), 150.2 ( $\text{C}_{\text{Ar}}$ ), 148.8 ( $\text{C}_{\text{Ar}}$ ), 148.2 ( $\text{C}_{\text{Ar}}$ ), 138.7 ( $\text{C}_{\text{Ar}}$ ), 136.7 ( $\text{C}_{\text{Ar}}$ ), 136.2 ( $\text{CH}_{\text{Ar}}$ ), 135.5 ( $\text{CH}_{\text{Ar}}$ ), 130.6 ( $\text{CH}_{\text{Ar}}$ ), 130.3 ( $\text{CH}_{\text{Ar}}$ ), 129.8 ( $\text{C}_{\text{Ar}}$ ), 128.7 ( $\text{CH}_{\text{Ar}}$ ), 128.6 ( $\text{CH}_{\text{Ar}}$ ), 128.2 ( $\text{CH}_{\text{Ar}}$ ), 127.4 ( $\text{CH}_{\text{Ar}}$ ), 126.5 ( $\text{CH}_{\text{Ar}}$ ), 122.9 ( $\text{CH}_{\text{Ar}}$ ), 122.3 ( $\text{C}_{\text{Ar}}$ ), 121.6 ( $\text{CH}_{\text{Ar}}$ ), 119.1 ( $\text{CH}_{\text{Ar}}$ ), 117.8 ( $\text{CH}_{\text{Ar}}$ ), 112.5 ( $\text{CH}_{\text{Ar}}$ ), 104.5 ( $\text{CH}_{\text{Ar}}$ ), 67.7 ( $\text{OCH}_2$ ), 66.8 ( $\text{NHCOOCH}_2$ ), 46.4 ( $\text{CH}_2\text{CH}_2\text{NHCON}$ ), 43.0 ( $\text{OCH}_2\text{CH}_2$ ), 40.9 ( $\text{CH}_2\text{NHCbz}$ ), 38.4 ( $\text{CH}_2\text{CH}_2\text{NHCON}$ ), 29.5 ( $\text{CH}_2\text{CH}_2\text{NHCbz}$ ), 26.4 (Triz $\text{CH}_2\text{CH}_2$ ), 25.2 (Triz $\text{CH}_2$ ); HRMS (ES, positive mode)  $m/z$ : calculated for  $\text{C}_{39}\text{H}_{38}\text{N}_8\text{O}_4\text{S}$  714.2737; Found 714.2734 (-0.38 ppm).

***Benzyl-(E)-(4-(1-(4-(4-(2-(2,3-dihydrobenzofuran-5-yl)vinyl)thiazol-2-yl)-3-(2-(2-oxoimidazolidin-1-yl)ethoxy)phenyl)-1H-1,2,3-triazol-4-yl)butyl)carbamate (11r).***

Following the general Hantzsch procedure, thioamide **8b** (250 mg, 0.47 mmol) and the  $\alpha$ -bromoketone **10r** (124 mg, 0.47 mmol) were reacted. After work-up, the residue was purified by flash column chromatography ( $\text{CH}_2\text{Cl}_2/\text{MeOH}$ , 97:3) to give **11r** (207 mg, 62%) as a yellow oil.  $^1\text{H}$  NMR ( $\text{CDCl}_3$ , 400 MHz)  $\delta$  (ppm): 8.55 (d,  $J = 8.6$  Hz, 1H, Ar), 7.81 (s, 1H, Ar), 7.51 (s, 1H, Ar), 7.46 (d,  $J = 15.8$  Hz, 1H, Thiaz $\text{CH}=\text{CH}$ ), 7.44 - 7.15 (m, 8H, Ar), 7.12 (s, 1H, Ar), 6.92 (d,  $J = 16.0$  Hz, 1H, Thiaz $\text{CH}=\text{CH}$ ), 6.71 (d,  $J = 8.2$  Hz, 1H Ar), 5.04 (br s, 1H, NHCON), 5.03 (s, 2H,  $\text{NHCOOCH}_2$ ), 4.68 (br s, 1H, NHCbz), 4.52 (t,  $J = 8.7$  Hz, 2H,  $\text{OCH}_2\text{CH}_2\text{Ph}$ ), 4.35 (t,  $J = 5.7$  Hz, 2H,  $\text{OCH}_2$ ), 3.69 (t,  $J = 5.6$  Hz, 2H,  $\text{OCH}_2\text{CH}_2$ ), 3.50 (t,  $J = 7.8$  Hz, 2H,  $\text{CH}_2\text{CH}_2\text{NHCON}$ ), 3.26 (t,  $J = 8.0$  Hz, 2H,  $\text{CH}_2\text{CH}_2\text{NHCON}$ ), 3.26 - 3.12 (m, 4H,  $\text{CH}_2\text{NHCbz}$ ,  $\text{OCH}_2\text{CH}_2\text{Ph}$ ), 2.76 (t,  $J = 7.3$  Hz, 2H, Triz $\text{CH}_2$ ), 1.72 (quin,  $J = 7.3$  Hz, 2H, Triz $\text{CH}_2\text{CH}_2$ ), 1.56 (quin,  $J = 7.6$  Hz, 2H,  $\text{CH}_2\text{CH}_2\text{NHCbz}$ );  $^{13}\text{C}$  NMR ( $\text{CDCl}_3$ , 100 MHz)  $\delta$  (ppm): 162.7 (NHCON), 160.7 ( $\text{OC}_{\text{Ar}}$ ), 160.3 ( $\text{OC}_{\text{Ar}}$ ), 156.6 ( $\text{C}_{\text{Ar}}$ ), 156.1 ( $\text{C}_{\text{Ar}}$ ), 153.8 ( $\text{C}_{\text{Ar}}$ ), 148.8 ( $\text{C}_{\text{Ar}}$ ), 138.5 ( $\text{C}_{\text{Ar}}$ ), 136.7 ( $\text{C}_{\text{Ar}}$ ), 131.5 ( $\text{C}_{\text{Ar}}$ ), 130.3 ( $\text{CH}_{\text{Ar}}$ ), 130.0 ( $\text{CH}_{\text{Ar}}$ ), 128.6 ( $\text{CH}_{\text{Ar}}$ ), 128.2 ( $\text{CH}_{\text{Ar}}$ ), 128.2 ( $\text{CH}_{\text{Ar}}$ ), 127.8 ( $\text{CH}_{\text{Ar}}$ ), 127.5 ( $\text{C}_{\text{Ar}}$ ), 123.0 ( $\text{CH}_{\text{Ar}}$ ), 122.5 ( $\text{C}_{\text{Ar}}$ ),

119.1 (CH<sub>Ar</sub>), 118.9 (CH<sub>Ar</sub>), 115.8 (CH<sub>Ar</sub>), 112.5 (CH<sub>Ar</sub>), 109.5 (CH<sub>Ar</sub>), 104.5 (CH<sub>Ar</sub>), 71.6 (OCH<sub>2</sub>CH<sub>2</sub>Ph), 67.8 (OCH<sub>2</sub>), 66.8 (NHCOOCH<sub>2</sub>), 46.4 (CH<sub>2</sub>CH<sub>2</sub>NHCON), 43.0 (OCH<sub>2</sub>CH<sub>2</sub>), 40.9 (CH<sub>2</sub>NHCbz), 38.4 (CH<sub>2</sub>CH<sub>2</sub>NHCON), 29.7 (OCH<sub>2</sub>CH<sub>2</sub>Ph), 29.5 (CH<sub>2</sub>CH<sub>2</sub>NHCbz), 26.4 (TrizCH<sub>2</sub>CH<sub>2</sub>), 25.2 (TrizCH<sub>2</sub>); HRMS (ES, positive mode) m/z: calculated for C<sub>38</sub>H<sub>39</sub>N<sub>7</sub>O<sub>5</sub>S 705.2733; Found 705.2728 (-0.82 ppm).

***Benzyl-(E)-(4-(1-(4-(4-(2-(dibenzo[b,d]furan-2-yl)vinyl)thiazol-2-yl)-3-(2-(2-oxoimidazolidin-1-yl)ethoxy)phenyl)-1H-1,2,3-triazol-4-yl)butyl)carbamate (11s).***

Following the general Hantzsch synthesis procedure, thioamide **8b** (150 mg, 0.28 mmol) α-bromoketone **10s** (88 mg, 0.28 mmol) were reacted. The final residue was purified by flash column chromatography (CH<sub>2</sub>Cl<sub>2</sub>/MeOH, 98:2) to yield **11s** (121 mg, 58%) as a colorless oil. <sup>1</sup>H NMR (DMSO-d<sub>6</sub>, 400 MHz) δ (ppm): 8.70 (br s, 1H, NHCbz), 8.60 (dd, *J* = 8.5, 2.2 Hz, 1H, Ar), 8.19 (d, *J* = 7.6 Hz, 1H, Ar), 7.88 - 7.66 (m, 8H, Ar), 7.60 - 7.50 (m, 1H, Ar), 7.47 - 7.24 (m, 8H, Ar), 6.31 (br s, 1H, NHCON), 5.02 (s, 2H, NHCOOCH<sub>2</sub>), 4.51 (t, *J* = 5.8 Hz, 2H, OCH<sub>2</sub>), 3.67 (t, *J* = 5.7 Hz, 2H, OCH<sub>2</sub>CH<sub>2</sub>), 3.52 (dd, *J* = 8.8, 6.8 Hz, 2H, CH<sub>2</sub>CH<sub>2</sub>NHCON), 3.35 - 3.08 (m, 4H, CH<sub>2</sub>CH<sub>2</sub>NHCON, CH<sub>2</sub>NHCbz), 2.76 (t, *J* = 7.5 Hz, 2H, TrizCH<sub>2</sub>), 1.72 (quin, *J* = 7.2 Hz, 2H, TrizCH<sub>2</sub>CH<sub>2</sub>), 1.54 (quin, *J* = 7.2 Hz, 2H, CH<sub>2</sub>CH<sub>2</sub>NHCbz); <sup>13</sup>C NMR (DMSO-d<sub>6</sub>, 75 MHz) δ (ppm): 161.9 (NHCON), 160.1 (OC<sub>Ar</sub>), 155.8 (OC<sub>Ar</sub>), 155.8 (OC<sub>Ar</sub>), 155.0 (NHCOO), 152.6 (C<sub>Ar</sub>), 147.9 (C<sub>Ar</sub>), 138.2 (C<sub>Ar</sub>), 137.1 (C<sub>Ar</sub>), 132.1 (C<sub>Ar</sub>), 130.2 (CH<sub>Ar</sub>), 129.1 (CH<sub>Ar</sub>), 128.0 (CH<sub>Ar</sub>), 127.5 (C<sub>Ar</sub>), 127.4 (CH<sub>Ar</sub>), 127.3 (CH<sub>Ar</sub>), 126.1 (CH<sub>Ar</sub>), 124.0 (C<sub>Ar</sub>), 123.3 (C<sub>Ar</sub>), 123.0 (CH<sub>Ar</sub>), 121.2 (C<sub>Ar</sub>), 121.1 (CH<sub>Ar</sub>), 121.0 (CH<sub>Ar</sub>), 120.0 (CH<sub>Ar</sub>), 118.7 (CH<sub>Ar</sub>), 117.4 (CH<sub>Ar</sub>), 112.0 (CH<sub>Ar</sub>), 111.6 (CH<sub>Ar</sub>), 111.4 (CH<sub>Ar</sub>), 104.5 (CH<sub>Ar</sub>), 67.5 (OCH<sub>2</sub>), 64.9 (NHCOOCH<sub>2</sub>), 45.1 (CH<sub>2</sub>CH<sub>2</sub>NHCON), 42.3 (OCH<sub>2</sub>CH<sub>2</sub>), 37.4 (CH<sub>2</sub>CH<sub>2</sub>NHCON), 28.7 (CH<sub>2</sub>CH<sub>2</sub>NHCbz), 25.8 (TrizCH<sub>2</sub>CH<sub>2</sub>), 24.5 (TrizCH<sub>2</sub>); HRMS (ES, positive mode) m/z: calculated for C<sub>42</sub>H<sub>39</sub>N<sub>7</sub>O<sub>5</sub>S 753.2733; Found 753.2713 (-2.65 ppm).

**1-(2-(5-(4-(4-Hydroxybutyl)-1H-1,2,3-triazol-1-yl)-2-(4-phenethylthiazol-2-**

**yl)phenoxy)ethyl)imidazolidin-2-one (12d).** Following the general Hantzsch procedure, thioamide **8g** (50 mg, 0.12 mmol) and the commercially available 1-bromo-4-phenylbutan-2-one **10a** (28 mg, 0.12 mmol) were reacted. After the work-up, the residue was purified flash column chromatography (CH<sub>2</sub>Cl<sub>2</sub>/MeOH, 95:5) to obtain **12d** (53 mg, 83%) as a colorless oil. <sup>1</sup>H NMR (DMSO-d<sub>6</sub>, 400 MHz) δ (ppm): 8.74 (s, 1H, Ar), 8.46 (d, *J* = 8.6 Hz, 1H, Ar), 7.75 (d, *J* = 2.1 Hz, 1H, Ar), 7.69 (dd, *J* = 8.6, 2.0 Hz, 1H, Ar), 7.37 (s, 1H, Ar), 7.29 - 7.11 (m, 4H, Ar), 7.20 - 7.15 (m, 1H, Ar), 6.39 (br s, 1H, NHCON), 4.47 (t, *J* = 5.7 Hz, 2H, OCH<sub>2</sub>), 4.40 (t, *J* = 5.1 Hz, 2H, OH), 3.63 (t, *J* = 5.6 Hz, 2H, OCH<sub>2</sub>CH<sub>2</sub>), 3.54 - 3.36 (m, 4H, CH<sub>2</sub>OH, CH<sub>2</sub>CH<sub>2</sub>NHCON), 3.22 (t, *J* = 7.8 Hz, 2H, CH<sub>2</sub>CH<sub>2</sub>NHCON), 3.15 - 3.03 (m, 4H, CH<sub>2</sub>CH<sub>2</sub>Ph), 2.73 (t, *J* = 7.6 Hz, 2H, TrizCH<sub>2</sub>), 1.73 (quin, *J* = 7.5 Hz, 2H, TrizCH<sub>2</sub>CH<sub>2</sub>), 1.58 - 1.37 (m, 2H, CH<sub>2</sub>CH<sub>2</sub>OH); <sup>13</sup>C NMR (DMSO-d<sub>6</sub>, 75 MHz) δ (ppm): 162.5 (NHCON), 159.8 (OC<sub>Ar</sub>), 156.0 (C<sub>Ar</sub>), 155.7 (C<sub>Ar</sub>), 148.7 (C<sub>Ar</sub>), 141.8 (C<sub>Ar</sub>), 138.4 (C<sub>Ar</sub>), 129.4 (CH<sub>Ar</sub>), 128.7 (CH<sub>Ar</sub>), 128.6 (CH<sub>Ar</sub>), 126.2 (CH<sub>Ar</sub>), 121.6 (C<sub>Ar</sub>), 120.6 (CH<sub>Ar</sub>), 116.3 (CH<sub>Ar</sub>), 112.3 (CH<sub>Ar</sub>), 104.6 (CH<sub>Ar</sub>), 68.0 (OCH<sub>2</sub>), 60.8 (CH<sub>2</sub>OH), 45.7 (CH<sub>2</sub>CH<sub>2</sub>NHCON), 42.8 (OCH<sub>2</sub>CH<sub>2</sub>), 37.9 (CH<sub>2</sub>CH<sub>2</sub>NHCON), 35.1 (CH<sub>2</sub>CH<sub>2</sub>Ph), 33.0 (CH<sub>2</sub>CH<sub>2</sub>Ph), 32.4 (TrizCH<sub>2</sub>CH<sub>2</sub>), 25.7 (TrizCH<sub>2</sub>), 25.3 (CH<sub>2</sub>CH<sub>2</sub>OH); HPLC (*Gradient A*, *Agilent*): *R*<sub>t</sub> = 8.0 min; HRMS (ES, positive mode) *m/z*: calculated for C<sub>28</sub>H<sub>32</sub>N<sub>6</sub>O<sub>3</sub>S 532.2257; Found 532.2258 (0.17 ppm); Anal. Calc. for C<sub>28</sub>H<sub>32</sub>N<sub>6</sub>O<sub>3</sub>S: C. 63.14; H. 6.06; N. 15.78; S. 6.02; Found: C. 62.55; H. 6.21; N. 15.41; S. 5.81.

**1-(2-(5-(4-butyl-1H-1,2,3-triazol-1-yl)-2-(4-phenethylthiazol-2-yl)phenoxy)ethyl)**

**imidazolidin-2-one (12e).** Following the general Hantzsch procedure, thioamide **8f** (50 mg, 0.13 mmol) and the commercially available 1-bromo-4-phenylbutan-2-one **10a** (31 mg, 0.13 mmol) were reacted for 3 h. The crude was purified by CCTLC on the Chromatotron (CH<sub>2</sub>Cl<sub>2</sub>/MeOH, 96:4) to give **12e** (57 mg, 85%) as a colorless oil. <sup>1</sup>H NMR (CDCl<sub>3</sub>, 400 MHz) δ (ppm): 8.47 (d, *J* = 8.5 Hz, 1H, Ar), 7.73 (s, 1H, Ar), 7.52 (d, *J* = 2.0 Hz, 1H, Ar), 7.28 (dd, *J* = 8.5, 2.0 Hz, 1H, Ar), 7.24 - 7.09 (m, 5H, Ar), 6.87 (s, 1H, Ar),

4.37 (t,  $J = 5.5$  Hz, 2H, OCH<sub>2</sub>), 3.73 (t,  $J = 5.5$  Hz, 2H, OCH<sub>2</sub>CH<sub>2</sub>), 3.54 (dd,  $J = 9.0, 6.7$  Hz, 2H, CH<sub>2</sub>CH<sub>2</sub>NHCON), 3.33 (dd,  $J = 8.7, 7.0$  Hz, 2H, CH<sub>2</sub>CH<sub>2</sub>NHCON), 3.19 - 2.93 (m, 4H, CH<sub>2</sub>CH<sub>2</sub>Ph), 2.74 (t,  $J = 7.7$  Hz, 2H, TrizCH<sub>2</sub>), 1.74 - 1.60 (m, 2H, TrizCH<sub>2</sub>CH<sub>2</sub>), 1.46 - 1.30 (m, 2H, CH<sub>2</sub>CH<sub>3</sub>), 0.90 (t,  $J = 7.4$  Hz, 3H, CH<sub>3</sub>); <sup>13</sup>C NMR (CDCl<sub>3</sub>, 75 MHz)  $\delta$  (ppm): 162.7 (NHCON), 160.3 (OC<sub>Ar</sub>), 156.1 (C<sub>Ar</sub>), 156.0 (C<sub>Ar</sub>), 149.6 (C<sub>Ar</sub>), 141.7 (C<sub>Ar</sub>), 138.4 (C<sub>Ar</sub>), 130.0 (CH<sub>Ar</sub>), 128.6 (CH<sub>Ar</sub>), 128.5 (CH<sub>Ar</sub>), 126.1 (CH<sub>Ar</sub>), 122.7 (C<sub>Ar</sub>), 118.8 (CH<sub>Ar</sub>), 115.2 (CH<sub>Ar</sub>), 112.4 (CH<sub>Ar</sub>), 104.6 (CH<sub>Ar</sub>), 68.2 (OCH<sub>2</sub>), 46.5 (CH<sub>2</sub>CH<sub>2</sub>NHCON), 43.2 (OCH<sub>2</sub>CH<sub>2</sub>), 38.5 (CH<sub>2</sub>CH<sub>2</sub>NHCON), 35.7 (CH<sub>2</sub>CH<sub>2</sub>Ph), 33.5 (CH<sub>2</sub>CH<sub>2</sub>Ph), 31.6 (TrizCH<sub>2</sub>CH<sub>2</sub>), 25.5 (TrizCH<sub>2</sub>), 22.5 (CH<sub>2</sub>CH<sub>3</sub>), 14.0 (CH<sub>3</sub>); HPLC (*Gradient A, Agilent*):  $R_t = 9.6$  min; HRMS (ES, positive mode)  $m/z$ : calculated for C<sub>28</sub>H<sub>32</sub>N<sub>6</sub>O<sub>2</sub>S 516.2308; Found 516.2310 (0.52 ppm); Anal. Calc. for C<sub>28</sub>H<sub>32</sub>N<sub>6</sub>O<sub>2</sub>S: C. 65.09; H. 6.24; N. 16.27; S. 6.21; Found: C. 64.69; H. 6.33; N. 15.79; S. 6.01.

**1-(2-(5-(4-Butyl-1H-1,2,3-triazol-1-yl)-2-(4-(2-([1,1'-biphenyl]-4-yl)ethyl)thiazol-2-yl)phenoxy)ethyl)imidazolidin-2-one (12f)**. A solution of **11f** (100 mg, 0.17 mmol) in a 1:1 mixture of THF/MeOH (30 mL) and in the presence of catalytic amount of Pd/C 10% (20% wt/wt) was hydrogenated with hydrogen balloon for 2 h at room temperature. After filtration over PTFE membrane filters, volatiles were removed and the crude was co-evaporated with mixtures of CH<sub>2</sub>Cl<sub>2</sub>/MeOH (5 x 10 mL). The residue was purified by CCTLC on the Chromatotron (CH<sub>2</sub>Cl<sub>2</sub>/MeOH, 97:3) to give **12f** (40 mg, 39%) as a white solid. <sup>1</sup>H NMR (CDCl<sub>3</sub>, 400 MHz)  $\delta$  (ppm): 8.48 (d,  $J = 8.5$  Hz, 1H, Ar), 7.73 (s, 1H, Ar), 7.57 - 7.49 (m, 3H, Ar), 7.45 (d,  $J = 8.1$  Hz, 2H, Ar), 7.35 (t,  $J = 7.5$  Hz, 2H, Ar), 7.30 - 7.14 (m, 4H, Ar), 6.90 (s, 1H, Ar), 4.46 (br s, 1H, NHCON), 4.37 (t,  $J = 5.5$  Hz, 2H, OCH<sub>2</sub>), 3.74 (t,  $J = 5.5$  Hz, 2H, OCH<sub>2</sub>CH<sub>2</sub>), 3.54 (dd,  $J = 9.0, 6.7$  Hz, 2H, CH<sub>2</sub>CH<sub>2</sub>NHCON), 3.33 (dd,  $J = 9.1, 6.6$  Hz, 2H, CH<sub>2</sub>CH<sub>2</sub>NHCON), 3.17 - 3.02 (m, 4H, ThiazCH<sub>2</sub>CH<sub>2</sub>), 2.75 (t,  $J = 7.7$  Hz, 2H, TrizCH<sub>2</sub>), 1.68 (quin,  $J = 7.5$  Hz, 2H, TrizCH<sub>2</sub>CH<sub>2</sub>), 1.38 (sex,  $J = 7.5$  Hz, 2H, CH<sub>2</sub>CH<sub>3</sub>), 0.90 (t,  $J = 7.4$  Hz, 3H, CH<sub>3</sub>); <sup>13</sup>C NMR (CDCl<sub>3</sub>, 75 MHz)  $\delta$  (ppm): 162.6 (NHCON), 160.4 (OC<sub>Ar</sub>), 156.0 (C<sub>Ar</sub>), 156.0 (C<sub>Ar</sub>), 149.6 (C<sub>Ar</sub>), 141.1 (C<sub>Ar</sub>), 139.0 (C<sub>Ar</sub>),



138.5 (C<sub>Ar</sub>), 130.0 (CH<sub>Ar</sub>), 129.0 (CH<sub>Ar</sub>), 128.9 (CH<sub>Ar</sub>), 127.2 (CH<sub>Ar</sub>), 127.2 (CH<sub>Ar</sub>), 127.1 (CH<sub>Ar</sub>), 122.7 (C<sub>Ar</sub>), 118.8 (CH<sub>Ar</sub>), 115.3 (CH<sub>Ar</sub>), 112.6 (CH<sub>Ar</sub>), 104.6 (CH<sub>Ar</sub>), 68.2 (OCH<sub>2</sub>), 46.5 (CH<sub>2</sub>CH<sub>2</sub>NHCON), 43.2 (OCH<sub>2</sub>CH<sub>2</sub>), 38.5 (CH<sub>2</sub>CH<sub>2</sub>NHCON), 35.3 (ThiazCH<sub>2</sub>CH<sub>2</sub>), 33.4 (ThiazCH<sub>2</sub>CH<sub>2</sub>), 31.6 (TrizCH<sub>2</sub>CH<sub>2</sub>), 25.5 (TrizCH<sub>2</sub>), 22.5 (CH<sub>2</sub>CH<sub>3</sub>), 14.0 (CH<sub>3</sub>); HPLC (*Gradient A, Agilent*): *R*<sub>t</sub> = 9.6 min; HRMS (ES, positive mode) *m/z*: calculated for C<sub>34</sub>H<sub>36</sub>N<sub>6</sub>O<sub>2</sub>S 592.2621; Found 592.2610 (-1.83 ppm); Anal. Calc. for C<sub>34</sub>H<sub>36</sub>N<sub>6</sub>O<sub>2</sub>S: C. 68.89; H. 6.12; N. 14.18; S. 5.41; Found: C. 68.38; H. 6.27; N. 13.90; S. 5.00.

**4-(1-(3-(2-(2-oxoimidazolidin-1-yl)ethoxy)-4-(4-phenethylthiazol-2-yl)phenyl)-1H-**

**1,2,3-triazol-4-yl)butanoic acid (12g).** Methyl ester **11g** (150 mg, 0.27 mmol) dissolved in THF (4 mL) was treated with 1 mL of an aqueous solution of LiOH (23 mg, 0.54 mmol) for 3 h at room temperature. Change from colorless to yellow was observed after the addition of the base. The crude was quenched with aq HCl 1N to pH = 1 and the acidic solution was concentrated under reduced pressure. The resulting solid was filtered and washed with H<sub>2</sub>O (3 x 5 mL) to give pure **12g** (136 mg, 93%) as a white solid. M.p.: 174.5 - 177.5 °C; <sup>1</sup>H NMR (DMSO-d<sub>6</sub>, 400 MHz) δ (ppm): 8.47 (d, *J* = 8.5 Hz, 1H, Ar), 7.80 (s, 1H, Ar), 7.52 (d, *J* = 2.0 Hz, 1H, Ar), 7.28 (dd, *J* = 8.5, 2.0 Hz, 1H, Ar), 7.22 - 7.03 (m, 5H, Ar), 6.87 (s, 1H, Ar), 4.81 (br s, 1H, NHCON), 4.36 (t, *J* = 5.5 Hz, 2H, OCH<sub>2</sub>), 3.72 (t, *J* = 5.5 Hz, 2H, OCH<sub>2</sub>CH<sub>2</sub>), 3.61 (s, 3H, Me), 3.53 (dd, *J* = 9.0, 6.6 Hz, 2H, CH<sub>2</sub>CH<sub>2</sub>NHCON), 3.33 (dd, *J* = 9.1, 6.6 Hz, 2H, CH<sub>2</sub>CH<sub>2</sub>NHCON), 3.14 - 2.93 (m, 4H, CH<sub>2</sub>CH<sub>2</sub>Ph), 2.79 (t, *J* = 7.5 Hz, 2H, TrizCH<sub>2</sub>), 2.37 (t, *J* = 7.4 Hz, 2H, CH<sub>2</sub>COOMe), 2.02 (quin, *J* = 7.5 Hz, 2H, TrizCH<sub>2</sub>CH<sub>2</sub>); <sup>13</sup>C NMR (DMSO-d<sub>6</sub>, 75 MHz) δ (ppm): 174.2 (COO), 162.2 (NHCON), 159.4 (OC<sub>Ar</sub>), 155.6 (C<sub>Ar</sub>), 156.4 (C<sub>Ar</sub>), 147.7 (C<sub>Ar</sub>), 141.4 (C<sub>Ar</sub>), 138.0 (C<sub>Ar</sub>), 129.0 (CH<sub>Ar</sub>), 128.4 (CH<sub>Ar</sub>), 128.3 (CH<sub>Ar</sub>), 125.9 (CH<sub>Ar</sub>), 121.3 (CH<sub>Ar</sub>), 120.4 (C<sub>Ar</sub>), 115.9 (CH<sub>Ar</sub>), 112.0 (CH<sub>Ar</sub>), 104.3 (CH<sub>Ar</sub>), 67.6 (OCH<sub>2</sub>), 45.3 (CH<sub>2</sub>CH<sub>2</sub>NHCON), 42.4 (OCH<sub>2</sub>CH<sub>2</sub>), 37.6 (CH<sub>2</sub>CH<sub>2</sub>NHCON), 34.8 (CH<sub>2</sub>CH<sub>2</sub>Ph), 33.0 (CH<sub>2</sub>CH<sub>2</sub>Ph), 32.7 (CH<sub>2</sub>COOH), 24.5 (TrizCH<sub>2</sub>CH<sub>2</sub>), 24.2 (TrizCH<sub>2</sub>); HRMS (ES, positive mode) *m/z*: calculated for C<sub>29</sub>H<sub>32</sub>N<sub>6</sub>O<sub>4</sub>S 560.2206; Found 560.2200 (-1.11 ppm). HPLC (*Gradient A, Agilent*): *R*<sub>t</sub> = 8.2 min; HRMS

(ES, negative mode) m/z: calculated for C<sub>28</sub>H<sub>30</sub>N<sub>6</sub>O<sub>4</sub>S 546.2049; Found 546.2059 (1.81 ppm); Anal. Calc. for C<sub>28</sub>H<sub>30</sub>N<sub>6</sub>O<sub>4</sub>S: C. 61.52; H. 5.53; N. 15.37; S. 5.86; Found: C. 61.17; H. 5.60; N. 15.21; S. 5.81.

**General procedure for N-Cbz deprotection.** A solution of the corresponding Cbz-protected compound (1 eq) in a 1:1 mixture of THF/MeOH (20 mL) containing Pd/C (10%) (20% wt/wt) and TFA (0.5 – 1.5 mL), was hydrogenated at room temperature for 2 h, under atmospheric pressure using a balloon filled with hydrogen gas (3 cycles of vacuum + hydrogen). The Pd/C was filtered through Whatman PTFE filter paper, the solvent was removed under reduced pressure, and co-evaporated with mixtures of CH<sub>2</sub>Cl<sub>2</sub>/MeOH several times (5 x 10 mL). The residue was purified by HPFC on a SP1 Isolera Biotage using reverse phase columns (From 0% of CH<sub>3</sub>CN to 100% of CH<sub>3</sub>CN in 45 min) to give the final deprotected compounds as trifluoroacetate salts.

**1-(2-(5-(4-(3-Ammoniumpropyl)-1H-1,2,3-triazol-1-yl)-2-(4-phenethylthiazol-2-yl)phenoxy)ethyl)imidazolidin-2-one 2,2,2 trifluoroacetate (12h).** Following the general procedure of Cbz removal, **11h** (160 mg, 0.25 mmol), Pd/C 10 % (32 mg) and TFA (1.2 mL) were reacted. Work-up and purification gave **12h** (76 mg, 49%) as a colorless oil. <sup>1</sup>H NMR (CD<sub>3</sub>OD, 400 MHz) δ (ppm): 8.47 (s, 1H, Ar), 8.46 (d, *J* = 8.6 Hz, 1H, Ar), 7.71 (d, *J* = 2.1 Hz, 1H, Ar), 7.59 (dd, *J* = 8.6, 2.1 Hz, 1H, Ar), 7.33 - 7.17 (m, 5H, Ar), 7.15 (s, 1H, Ar), 4.49 (t, *J* = 5.5 Hz, 2H, OCH<sub>2</sub>), 3.75 (t, *J* = 5.5 Hz, 2H, OCH<sub>2</sub>CH<sub>2</sub>), 3.60 (dd, *J* = 9.3, 6.9 Hz, 2H, CH<sub>2</sub>CH<sub>2</sub>NHCON), 3.37 (dd, *J* = 9.3, 6.9 Hz, 2H, CH<sub>2</sub>CH<sub>2</sub>NHCON), 3.18 - 3.03 (m, 6H, CH<sub>2</sub>CH<sub>2</sub>Ph, CH<sub>2</sub>NH<sub>3</sub><sup>+</sup>), 2.93 (t, *J* = 7.4 Hz, 2H, TrizCH<sub>2</sub>), 2.12 (quin, *J* = 7.6 Hz, 2H, CH<sub>2</sub>CH<sub>2</sub>NH<sub>3</sub><sup>+</sup>); <sup>13</sup>C NMR (CD<sub>3</sub>OD, 75 MHz) δ (ppm): 165.1 (NHCON), 162.0 (OC<sub>Ar</sub>), 157.5 (C<sub>Ar</sub>), 157.1 (C<sub>Ar</sub>), 148.4 (C<sub>Ar</sub>), 142.8 (C<sub>Ar</sub>), 139.6 (C<sub>Ar</sub>), 130.8 (CH<sub>Ar</sub>), 129.5 (CH<sub>Ar</sub>), 129.4 (CH<sub>Ar</sub>), 127.0 (CH<sub>Ar</sub>), 123.9 (C<sub>Ar</sub>), 121.8 (CH<sub>Ar</sub>), 117.0 (CH<sub>Ar</sub>), 113.6 (CH<sub>Ar</sub>), 105.8 (CH<sub>Ar</sub>), 68.5 (OCH<sub>2</sub>), 47.0 (CH<sub>2</sub>CH<sub>2</sub>NHCON), 43.8 (OCH<sub>2</sub>CH<sub>2</sub>), 40.2 (CH<sub>2</sub>NH<sub>3</sub><sup>+</sup>), 39.3 (CH<sub>2</sub>CH<sub>2</sub>NHCON), 36.7 (CH<sub>2</sub>CH<sub>2</sub>Ph), 34.3 (CH<sub>2</sub>CH<sub>2</sub>Ph), 28.2 (CH<sub>2</sub>CH<sub>2</sub>NH<sub>3</sub><sup>+</sup>), 23.2 (TrizCH<sub>2</sub>); HPLC (*Gradient A, Agilent*): *R*<sub>t</sub> = 7.2 min; HRMS (ES, positive mode) m/z:

calculated for C<sub>27</sub>H<sub>31</sub>N<sub>7</sub>O<sub>2</sub>S 517.2260; Found 517.2266 (1.17 ppm); Anal. Calc. for C<sub>27</sub>H<sub>31</sub>N<sub>7</sub>O<sub>2</sub>S.TFA: C. 55.14; H. 5.11; N. 15.52; S. 5.08; Found: C. 54.99; H. 5.24; N. 15.09; S. 5.00.

**1-(2-(2-(4-(2-([1,1'-Biphenyl]-4-yl)ethyl)thiazol-2-yl)-5-(4-(3-ammoniumpropyl)-1H-1,2,3-triazol-1-yl)phenoxy)ethyl)imidazolidin-2-one 2,2,2 trifluoroacetate (12i).**

Following the general Cbz deprotection procedure, **11i** (107 mg, 0.15 mmol), Pd/C 10 % (21 mg) and TFA (1 mL) were reacted, to give **12i** (26 mg, 25%) as a colorless oil. <sup>1</sup>H NMR (DMSO-d<sub>6</sub>, 400 MHz) δ (ppm): 8.77 (s, 1H, Ar), 8.49 (d, *J* = 8.6 Hz, 1H, Ar), 7.88 - 7.55 (m, 8H, Ar), 7.53 - 7.41 (m, 2H, Ar), 7.36 - 7.31 (m, 2H, Ar), 6.40 (br s, 1H, NHCON), 4.47 (t, *J* = 5.7 Hz, 2H, OCH<sub>2</sub>), 3.64 (t, *J* = 5.6 Hz, 2H, OCH<sub>2</sub>CH<sub>2</sub>), 3.49 (dd, *J* = 9.0, 6.7 Hz, 2H, CH<sub>2</sub>CH<sub>2</sub>NHCON), 3.22 (dd, *J* = 9.0, 6.7 Hz, 2H, CH<sub>2</sub>CH<sub>2</sub>NHCON), 3.17 - 3.03 (m, 4H, ThiazCH<sub>2</sub>CH<sub>2</sub>), 2.93 (t, *J* = 7.5, 2H, CH<sub>2</sub>NH<sub>3</sub><sup>+</sup>), 2.83 (t, *J* = 8.5 Hz, 2H, TrizCH<sub>2</sub>), 1.98 (quin, *J* = 7.6 Hz, 2H, CH<sub>2</sub>CH<sub>2</sub>NH<sub>3</sub><sup>+</sup>); <sup>13</sup>C NMR (DMSO-d<sub>6</sub>, 75 MHz) δ (ppm): 162.2 (NHCON), 159.4 (OC<sub>Ar</sub>), 155.6 (C<sub>Ar</sub>), 155.4 (C<sub>Ar</sub>), 147.0 (C<sub>Ar</sub>), 140.7 (C<sub>Ar</sub>), 140.0 (C<sub>Ar</sub>), 137.9 (C<sub>Ar</sub>), 137.8 (C<sub>Ar</sub>), 129.0 (CH<sub>Ar</sub>), 128.9 (CH<sub>Ar</sub>), 128.9 (CH<sub>Ar</sub>), 127.2 (CH<sub>Ar</sub>), 126.6 (CH<sub>Ar</sub>), 126.5 (CH<sub>Ar</sub>), 121.5 (C<sub>Ar</sub>), 120.6 (CH<sub>Ar</sub>), 116.1 (CH<sub>Ar</sub>), 112.1 (CH<sub>Ar</sub>), 104.5 (CH<sub>Ar</sub>), 67.6 (OCH<sub>2</sub>), 45.4 (CH<sub>2</sub>CH<sub>2</sub>NHCON), 42.4 (OCH<sub>2</sub>CH<sub>2</sub>), 37.6 (CH<sub>2</sub>NH<sub>3</sub><sup>+</sup>), 37.5 (CH<sub>2</sub>CH<sub>2</sub>NHCON), 34.3 (ThiazCH<sub>2</sub>CH<sub>2</sub>), 32.6 (ThiazCH<sub>2</sub>CH<sub>2</sub>), 26.7 (CH<sub>2</sub>CH<sub>2</sub>NH<sub>3</sub><sup>+</sup>), 22.0 (TrizCH<sub>2</sub>); HPLC (*Gradient A, Agilent*): *R*<sub>t</sub> = 8.4 min; HRMS (ES, positive mode) *m/z*: calculated for C<sub>33</sub>H<sub>35</sub>N<sub>7</sub>O<sub>2</sub>S 593.2573; Found 593.2572 (-0.09 ppm); Anal. Calc. for C<sub>33</sub>H<sub>35</sub>N<sub>7</sub>O<sub>2</sub>S.TFA: C. 59.40; H. 5.13; N. 13.85; S. 4.53; Found: C. 59.67; H. 5.41; N. 13.66; S. 4.25.

**4-(1-(3-Methoxy-4-(4-phenethylthiazol-2-yl)phenyl)-1H-1,2,3-triazol-4-yl)butan-1-ammonium 2,2,2 trifluoroacetate (12j).** A solution of **11j** (60 mg, 0.11 mmol) in CH<sub>2</sub>Cl<sub>2</sub> (7 mL) was treated with Pd/C 10 % (20 mg) and TFA (1 mL) according to the general Cbz deprotection procedure. Work-up and purification afforded **12j** (20 mg, 36%) as a

colorless oil.  $^1\text{H}$  NMR ( $\text{CD}_3\text{OD}$ , 400 MHz)  $\delta$  (ppm): 8.45 (s, 1H, Ar), 8.45 (d,  $J = 8.3$  Hz, 1H, Ar), 7.67 (d,  $J = 2.1$  Hz, 1H, Ar), 7.55 (dd,  $J = 8.6, 2.1$  Hz, 1H, Ar), 7.36 - 7.16 (m, 5H, Ar), 7.15 (s, 1H, Ar), 4.12 (s, 3H,  $\text{OCH}_3$ ), 3.20 - 3.02 (m, 4H,  $\text{CH}_2\text{CH}_2\text{Ph}$ ), 3.00 (t,  $J = 7.5$  Hz, 2H,  $\text{CH}_2\text{NH}_3^+$ ), 2.87 (t,  $J = 7.3$  Hz, 2H,  $\text{TrizCH}_2$ ), 1.95 - 1.85 (m, 2H,  $\text{TrizCH}_2\text{CH}_2$ ), 1.84 - 1.75 (m, 2H,  $\text{CH}_2\text{CH}_2\text{NH}_3^+$ );  $^{13}\text{C}$  NMR ( $\text{CD}_3\text{OD}$ , 100 MHz)  $\delta$  (ppm): 162.1 ( $\text{OC}_{\text{Ar}}$ ), 158.6 ( $\text{C}_{\text{Ar}}$ ), 156.8 ( $\text{C}_{\text{Ar}}$ ), 149.4 ( $\text{C}_{\text{Ar}}$ ), 142.8 ( $\text{C}_{\text{Ar}}$ ), 139.8 ( $\text{C}_{\text{Ar}}$ ), 130.5 ( $\text{CH}_{\text{Ar}}$ ), 129.5 ( $\text{CH}_{\text{Ar}}$ ), 129.4 ( $\text{CH}_{\text{Ar}}$ ), 127.0 ( $\text{CH}_{\text{Ar}}$ ), 123.8 ( $\text{C}_{\text{Ar}}$ ), 121.6 ( $\text{CH}_{\text{Ar}}$ ), 116.9 ( $\text{CH}_{\text{Ar}}$ ), 113.2 ( $\text{CH}_{\text{Ar}}$ ), 104.8 ( $\text{CH}_{\text{Ar}}$ ), 56.7 ( $\text{OCH}_3$ ), 40.4 ( $\text{CH}_2\text{NH}_3^+$ ), 36.7 ( $\text{CH}_2\text{CH}_2\text{Ph}$ ), 34.2 ( $\text{CH}_2\text{CH}_2\text{Ph}$ ), 28.0 ( $\text{CH}_2\text{CH}_2\text{NH}_3^+$ ), 27.1 ( $\text{TrizCH}_2\text{CH}_2$ ), 25.6 ( $\text{TrizCH}_2$ ); HPLC (*Gradient A, Agilent*):  $R_t = 8.1$  min; HRMS (ES, positive mode)  $m/z$ : calculated for  $\text{C}_{24}\text{H}_{27}\text{N}_5\text{OS}$  433.1936; Found 433.1931 (-1.25 ppm); Anal. Calc. for  $\text{C}_{24}\text{H}_{27}\text{N}_5\text{OS.TFA}$ : C. 57.03; H. 5.15; N. 12.79; S. 5.85; Found: C. 57.25; H. 5.31; N. 12.61; S. 5.39.

**4-(1-(3-Methoxy-4-(4-(2-([1,1'-Biphenyl]-4-yl)ethyl)thiazol-2-yl)phenyl)-1H-1,2,3-triazol-4-yl)butan-1-ammonium 2,2,2 trifluoroacetate (12k).** Following the general Cbz deprotection procedure, **11k** (120 mg, 0.19 mmol), Pd/C 10 % (24 mg) and TFA (1 mL) were reacted. Work-up and purification yielded **12k** (42 mg, 36%) as a colorless oil.  $^1\text{H}$  NMR ( $\text{DMSO-d}_6$ , 400 MHz)  $\delta$  (ppm): 8.76 (s, 1H, Ar), 8.48 (d,  $J = 8.6$  Hz, 1H, Ar), 7.82 - 7.70 (m, 3H,  $\text{NH}_3^+$ ), 7.73 (d,  $J = 2.1$  Hz, 1H, Ar), 7.68 - 7.61 (m, 3H, Ar), 7.58 (d,  $J = 8.2$  Hz, 2H, Ar), 7.48 - 7.41 (m, 3H, Ar), 7.38 - 7.27 (m, 3H, Ar), 4.13 (s, 3H,  $\text{OCH}_3$ ), 3.20 - 3.05 (m, 4H,  $\text{ThiazCH}_2\text{CH}_2$ ), 2.85 (t,  $J = 7.5$  Hz, 2H,  $\text{CH}_2\text{NH}_3^+$ ), 2.77 (t,  $J = 7.3$  Hz, 2H,  $\text{TrizCH}_2$ ), 1.75 (quin,  $J = 7.2$  Hz, 2H,  $\text{TrizCH}_2\text{CH}_2$ ), 1.63 (quin,  $J = 7.2$  Hz, 2H,  $\text{CH}_2\text{CH}_2\text{NH}_3^+$ );  $^{13}\text{C}$  NMR ( $\text{DMSO-d}_6$ , 100 MHz)  $\delta$  (ppm): 159.3 ( $\text{OC}_{\text{Ar}}$ ), 156.6 ( $\text{C}_{\text{Ar}}$ ), 155.3 ( $\text{C}_{\text{Ar}}$ ), 147.7 ( $\text{C}_{\text{Ar}}$ ), 140.7 ( $\text{C}_{\text{Ar}}$ ), 140.0 ( $\text{C}_{\text{Ar}}$ ), 138.0 ( $\text{C}_{\text{Ar}}$ ), 137.8 ( $\text{C}_{\text{Ar}}$ ), 129.0 ( $\text{CH}_{\text{Ar}}$ ), 128.9 ( $\text{CH}_{\text{Ar}}$ ), 126.6 ( $\text{CH}_{\text{Ar}}$ ), 126.5 ( $\text{CH}_{\text{Ar}}$ ), 121.2 ( $\text{CH}_{\text{Ar}}$ ), 120.5 ( $\text{CH}_{\text{Ar}}$ ), 120.4 ( $\text{CH}_{\text{Ar}}$ ), 118.8 ( $\text{C}_{\text{Ar}}$ ), 116.0 ( $\text{CH}_{\text{Ar}}$ ), 111.9 ( $\text{CH}_{\text{Ar}}$ ), 103.7 ( $\text{CH}_{\text{Ar}}$ ), 56.5 ( $\text{OCH}_3$ ), 38.6 ( $\text{CH}_2\text{NH}_3^+$ ), 34.3 ( $\text{ThiazCH}_2\text{CH}_2$ ), 32.6 ( $\text{ThiazCH}_2\text{CH}_2$ ), 26.5 ( $\text{CH}_2\text{CH}_2\text{NH}_3^+$ ), 25.6 ( $\text{TrizCH}_2\text{CH}_2$ ), 24.4 ( $\text{TrizCH}_2$ ), HPLC (*Gradient A, Agilent*):  $R_t = 9.6$  min; HRMS (ES, positive mode)  $m/z$ :

calculated for C<sub>30</sub>H<sub>31</sub>N<sub>5</sub>OS 509.2249; Found 509.2256 (1.37 ppm); Anal. Calc. for C<sub>30</sub>H<sub>31</sub>N<sub>5</sub>OS.TFA: C. 61.62; H. 5.17; N. 11.23; S. 5.14; Found: C. 61.26; H. 5.08; N. 11.22; S. 5.13.

**1-(2-(5-(4-(4-Ammoniobutyl)-1H-1,2,3-triazol-1-yl)-2-(4-phenylthiazol-2-yl)phenoxy)ethyl)imidazolidin-2-one 2,2,2 trifluoroacetate (12n).** According to the general Cbz deprotection procedure, **11n** (90 mg, 0.14 mmol), Pd/C 10 % (18 mg) and TFA (1 mL) were reacted. After work-up and purification compound **12n** (21 mg, 26%) was obtained as a colorless oil. <sup>1</sup>H NMR (CD<sub>3</sub>OD, 400 MHz) δ (ppm): 8.64 (d, *J* = 8.6 Hz, 1H, Ar), 8.46 (s, 1H, Ar), 8.54 (dd, *J* = 8.2, 1.3 Hz, 2H, Ar), 7.81 (s, 1H, Ar), 7.71 (d, *J* = 2.0 Hz, 1H, Ar), 7.61 (dd, *J* = 8.6, 2.0 Hz, 1H, Ar), 7.45 (dd, *J* = 8.3, 7.0 Hz, 2H, Ar), 7.36 (d, *J* = 7.4 Hz, 1H, Ar), 4.51 (t, *J* = 5.5 Hz, 2H, OCH<sub>2</sub>), 3.78 (t, *J* = 5.5 Hz, 2H, OCH<sub>2</sub>CH<sub>2</sub>), 3.64 (dd, *J* = 9.3, 6.9 Hz, 2H, CH<sub>2</sub>CH<sub>2</sub>NHCON), 3.39 (dd, *J* = 9.2, 6.9 Hz, 2H, CH<sub>2</sub>CH<sub>2</sub>NHCON), 3.03 (t, *J* = 7.4 Hz, 2H, CH<sub>2</sub>NH<sub>3</sub><sup>+</sup>), 2.87 (t, *J* = 7.2 Hz, 2H, TrizCH<sub>2</sub>), 1.92 - 1.83 (m, 2H, TrizCH<sub>2</sub>CH<sub>2</sub>), 1.83 - 1.73 (m, 2H, CH<sub>2</sub>CH<sub>2</sub>NH<sub>3</sub><sup>+</sup>); <sup>13</sup>C NMR (CD<sub>3</sub>OD, 100 MHz) δ (ppm): 165.1 (NHCON), 162.0 (OC<sub>Ar</sub>), 157.5 (C<sub>Ar</sub>), 155.8 (C<sub>Ar</sub>), 149.3 (C<sub>Ar</sub>), 139.7 (C<sub>Ar</sub>), 135.9 (C<sub>Ar</sub>), 131.0 (CH<sub>Ar</sub>), 129.8 (CH<sub>Ar</sub>), 129.2 (CH<sub>Ar</sub>), 127.4 (CH<sub>Ar</sub>), 123.9 (C<sub>Ar</sub>), 121.6 (CH<sub>Ar</sub>), 116.0 (CH<sub>Ar</sub>), 113.6 (CH<sub>Ar</sub>), 105.6 (CH<sub>Ar</sub>), 68.4 (OCH<sub>2</sub>), 47.0 (CH<sub>2</sub>CH<sub>2</sub>NHCON), 43.9 (OCH<sub>2</sub>CH<sub>2</sub>), 40.4 (CH<sub>2</sub>NH<sub>3</sub><sup>+</sup>), 39.3 (CH<sub>2</sub>CH<sub>2</sub>NHCON), 28.0 (CH<sub>2</sub>CH<sub>2</sub>NH<sub>3</sub><sup>+</sup>), 27.1 (TrizCH<sub>2</sub>CH<sub>2</sub>), 25.6 (TrizCH<sub>2</sub>); HPLC (*Gradient A, Agilent*): *R*<sub>t</sub> = 7.5 min; HRMS (ES, positive mode) *m/z*: calculated for C<sub>26</sub>H<sub>29</sub>N<sub>7</sub>O<sub>2</sub>S 503.2103; Found 503.2100 (-0.66 ppm); Anal. Calc. for C<sub>26</sub>H<sub>29</sub>N<sub>7</sub>O<sub>2</sub>S.TFA: C. 54.45; H. 4.90; N. 15.87; S. 5.19; Found: C. 54.66; H. 4.48; N. 15.90; S. 5.15.

**1-(2-(5-(4-(4-Ammoniumbutyl)-1H-1,2,3-triazol-1-yl)-2-(4-(3-phenylpropyl)thiazol-2-yl)phenoxy)ethyl)imidazolidin-2-one 2,2,2 trifluoroacetate (12p).** The general Cbz deprotection procedure was followed with **11p** (160 mg, 0.24 mmol), Pd/C 10 % (32 mg) and TFA (1.3 mL) to give, after work-up and purification, compound **12p** (16 mg, 11%) as a colorless oil. <sup>1</sup>H NMR (CD<sub>3</sub>OD, 400 MHz) δ (ppm): 8.50 (s, 1H, Ar), 8.48 (d, *J* = 8.5 Hz,

1H, Ar), 7.71 (d,  $J = 2.1$  Hz, 1H, Ar), 7.58 (dd,  $J = 8.6, 2.0$  Hz, 1H, Ar), 7.38 - 7.06 (m, 6H, Ar), 4.49 (t,  $J = 5.6$  Hz, 2H, OCH<sub>2</sub>), 3.75 (t,  $J = 5.5$  Hz, 2H, OCH<sub>2</sub>CH<sub>2</sub>), 3.61 (dd,  $J = 9.3, 6.9$  Hz, 2H, CH<sub>2</sub>CH<sub>2</sub>NHCON), 3.37 (dd,  $J = 9.3, 6.9$  Hz, 2H, CH<sub>2</sub>CH<sub>2</sub>NHCON), 3.00 (t,  $J = 7.5$  Hz, 2H, CH<sub>2</sub>NH<sub>3</sub><sup>+</sup>), 2.93 - 2.84 (m,  $J = 7.0$  Hz, 4H, ThiazCH<sub>2</sub>, CH<sub>2</sub>Ph), 2.71 (t,  $J = 7.6$  Hz, 2H, TrizCH<sub>2</sub>), 2.09 (quin,  $J = 7.6$  Hz, 2H, ThiazCH<sub>2</sub>CH<sub>2</sub>), 1.99 - 1.85 (m, 2H, TrizCH<sub>2</sub>CH<sub>2</sub>), 1.78 - 1.72 (m, 2H, CH<sub>2</sub>CH<sub>2</sub>NH<sub>3</sub><sup>+</sup>); <sup>13</sup>C NMR (CD<sub>3</sub>OD, 75 MHz)  $\delta$  (ppm): 165.1 (NHCON), 162.0 (OC<sub>Ar</sub>), 157.8 (C<sub>Ar</sub>), 157.5 (C<sub>Ar</sub>), 149.3 (C<sub>Ar</sub>), 143.4 (C<sub>Ar</sub>), 139.6 (C<sub>Ar</sub>), 130.8 (CH<sub>Ar</sub>), 129.5 (CH<sub>Ar</sub>), 129.4 (CH<sub>Ar</sub>), 126.8 (CH<sub>Ar</sub>), 123.9 (C<sub>Ar</sub>), 121.6 (CH<sub>Ar</sub>), 116.6 (CH<sub>Ar</sub>), 113.6 (CH<sub>Ar</sub>), 105.7 (CH<sub>Ar</sub>), 68.5 (OCH<sub>2</sub>), 46.9 (CH<sub>2</sub>CH<sub>2</sub>NHCON), 43.9 (OCH<sub>2</sub>CH<sub>2</sub>), 40.4 (CH<sub>2</sub>NH<sub>3</sub><sup>+</sup>), 39.3 (CH<sub>2</sub>CH<sub>2</sub>NHCON), 36.4 (CH<sub>2</sub>CH<sub>2</sub>CH<sub>2</sub>Ph), 32.4 (CH<sub>2</sub>CH<sub>2</sub>CH<sub>2</sub>Ph), 31.7 (CH<sub>2</sub>CH<sub>2</sub>CH<sub>2</sub>Ph), 28.0 (CH<sub>2</sub>CH<sub>2</sub>NH<sub>3</sub><sup>+</sup>), 27.1 (TrizCH<sub>2</sub>CH<sub>2</sub>), 25.6 (TrizCH<sub>2</sub>); HPLC (*Gradient A, Agilent*):  $R_t = 7.7$  min; HRMS (ES, positive mode)  $m/z$ : calculated for C<sub>29</sub>H<sub>35</sub>N<sub>7</sub>O<sub>2</sub>S 545.2573; Found 545.2573 (0.03 ppm); Anal. Calc. for C<sub>29</sub>H<sub>35</sub>N<sub>7</sub>O<sub>2</sub>S.TFA: C. 56.44; H. 5.50; N. 14.86; S. 4.86; Found: C. 56.04; H. 5.66; N. 14.59; S. 4.48.

**1-(2-(5-(4-(4-Ammoniumbutyl)-1H-1,2,3-triazol-1-yl)-2-(4-(2-(3,4-dihydro-2H-1-quinolin-5-yl)ethyl)thiazol-2-yl)phenoxy)ethyl)imidazolidin-2-one** **2,2,2**

**trifluoroacetate (12q).** Following the general Cbz deprotection procedure, **11q** (115 mg, 0.16 mmol) was hydrogenated to give **12q** (24 mg, 15%) as a colorless oil. <sup>1</sup>H NMR (CD<sub>3</sub>OD, 400 MHz)  $\delta$  (ppm): 8.47 (s, 1H, Ar), 8.46 (d,  $J = 8.9$  Hz, 1H, Ar), 7.71 (d,  $J = 2.1$  Hz, 1H, Ar), 7.59 (dd,  $J = 8.6, 2.0$  Hz, 1H, Ar), 7.15 (s, 1H, Ar), 6.93 - 6.82 (m, 2H, Ar), 6.63 (d,  $J = 8.7$  Hz, 1H, Ar), 4.49 (t,  $J = 5.5$  Hz, 2H, OCH<sub>2</sub>), 3.75 (t,  $J = 5.5$  Hz, 2H, OCH<sub>2</sub>CH<sub>2</sub>), 3.61 (dd,  $J = 9.3, 6.9$  Hz, 2H, CH<sub>2</sub>CH<sub>2</sub>NHCON), 3.37 (dd,  $J = 9.3, 6.9$  Hz, 2H, CH<sub>2</sub>CH<sub>2</sub>NHCON), 3.27 (t,  $J = 5.5$  Hz, 2H, PhNHCH<sub>2</sub>), 3.08 (t,  $J = 7.5$  Hz, 2H, ThiazCH<sub>2</sub>CH<sub>2</sub>), 3.03 - 2.92 (m, 4H, ThiazCH<sub>2</sub>CH<sub>2</sub>, CH<sub>2</sub>NH<sub>3</sub><sup>+</sup>), 2.88 (t,  $J = 7.2$  Hz, 2H, TrizCH<sub>2</sub>), 2.75 (m,  $J = 6.5$  Hz, 2H, PhNHCH<sub>2</sub>CH<sub>2</sub>CH<sub>2</sub>), 1.95 (quin,  $J = 6.3$  Hz, 2H, PhNHCH<sub>2</sub>CH<sub>2</sub>), 1.89 - 1.72 (m, 4H, TrizCH<sub>2</sub>CH<sub>2</sub>, CH<sub>2</sub>CH<sub>2</sub>NH<sub>3</sub><sup>+</sup>); <sup>13</sup>C NMR (CD<sub>3</sub>OD, 100

MHz)  $\delta$  (ppm): 165.1 (NHCON), 161.0 (OC<sub>Ar</sub>), 157.5 (C<sub>Ar</sub>), 157.3 (C<sub>Ar</sub>), 149.3 (C<sub>Ar</sub>), 141.5 (C<sub>Ar</sub>), 139.7 (C<sub>Ar</sub>), 134.9 (C<sub>Ar</sub>), 130.8 (CH<sub>Ar</sub>), 130.8 (CH<sub>Ar</sub>), 128.0 (CH<sub>Ar</sub>), 125.6 (C<sub>Ar</sub>), 123.8 (C<sub>Ar</sub>), 121.6 (CH<sub>Ar</sub>), 118.2 (CH<sub>Ar</sub>), 116.9 (CH<sub>Ar</sub>), 113.6 (CH<sub>Ar</sub>), 105.7 (CH<sub>Ar</sub>), 68.4 (OCH<sub>2</sub>), 46.9 (CH<sub>2</sub>CH<sub>2</sub>NHCON), 43.8 (OCH<sub>2</sub>CH<sub>2</sub>), 43.8 (PhNHCH<sub>2</sub>), 40.4 (CH<sub>2</sub>NH<sub>3</sub><sup>+</sup>), 39.3 (CH<sub>2</sub>CH<sub>2</sub>NHCON), 36.0 (ThiazCH<sub>2</sub>CH<sub>2</sub>), 34.5 (ThiazCH<sub>2</sub>CH<sub>2</sub>), 28.0 (CH<sub>2</sub>CH<sub>2</sub>NH<sub>3</sub><sup>+</sup>), 27.5 (PhNHCH<sub>2</sub>CH<sub>2</sub>CH<sub>2</sub>), 27.1 (TrizCH<sub>2</sub>CH<sub>2</sub>), 25.6 (TrizCH<sub>2</sub>), 22.8 (PhNHCH<sub>2</sub>CH<sub>2</sub>); HPLC: (Gradient from 2% of CH<sub>3</sub>CN to 30% of CH<sub>3</sub>CN, Agilent), *R*<sub>t</sub> = 1.4 min; HRMS (ES, positive mode) *m/z*: calculated for C<sub>31</sub>H<sub>38</sub>N<sub>8</sub>O<sub>2</sub>S 586.2838; Found 586.2859 (3.60 ppm); Anal. Calc. for C<sub>31</sub>H<sub>38</sub>N<sub>8</sub>O<sub>2</sub>S.2TFA: C. 51.59; H. 4.95; N. 13.75; S. 3.93; Found: C. 51.11; H. 4.86; N. 13.26; S. 3.56.

**1-(2-(5-(4-(4-Ammoniumbutyl)-1H-1,2,3-triazol-1-yl)-2-(4-(2-(2,3-dihydrobenzofuran-6-yl)ethyl)thiazol-2-yl)phenoxy)ethyl)imidazolidin-2-one 2,2,2 trifluoroacetate (12r).**

Following the general procedure of Cbz deprotection, **11r** (106 mg, 0.15 mmol) was hydrogenated with Pd/C 10 % (21 mg) and TFA (1 mL). Work-up and purification yielded **12r** (43 mg, 42%) as a colorless oil. <sup>1</sup>H NMR (D<sub>2</sub>O, 400 MHz, 90 °C)  $\delta$  (ppm): 8.58 (d, *J* = 8.5 Hz, 1H, Ar), 8.55 (s, 1H, Ar), 7.84 (d, *J* = 2.0 Hz, 1H, Ar), 7.67 (dd, *J* = 8.6, 2.0 Hz, 1H, Ar), 7.35 (d, *J* = 1.9 Hz, 1H, Ar), 7.30 (s, 1H, Ar), 7.25 (dd, *J* = 8.1, 1.9 Hz, 1H, Ar), 7.06 (d, *J* = 8.0 Hz, 1H, Ar), 4.40 (t, *J* = 5.5 Hz, 2H, OCH<sub>2</sub>CH<sub>2</sub>N), 4.17 (t, *J* = 8.7 Hz, 2H, OCH<sub>2</sub>CH<sub>2</sub>Ph), 4.06 (t, *J* = 5.5 Hz, 2H, OCH<sub>2</sub>CH<sub>2</sub>N), 3.92 (dd, *J* = 9.7, 6.8 Hz, 2H, CH<sub>2</sub>CH<sub>2</sub>NHCON), 3.78 (dd, *J* = 9.5, 6.8 Hz, 2H, CH<sub>2</sub>CH<sub>2</sub>NHCON), 3.67 (t, *J* = 8.7 Hz, OCH<sub>2</sub>CH<sub>2</sub>Ph), 3.48 - 3.21 (m, 8H, ThiazCH<sub>2</sub>CH<sub>2</sub>, CH<sub>2</sub>NH<sub>3</sub><sup>+</sup>, TrizCH<sub>2</sub>), 2.38 - 2.26 (m, 2H, TrizCH<sub>2</sub>CH<sub>2</sub>, CH<sub>2</sub>CH<sub>2</sub>NH<sub>3</sub><sup>+</sup>); <sup>13</sup>C NMR (D<sub>2</sub>O, 100 MHz, 90 °C)  $\delta$  (ppm): 164.5 (NHCON), 160.7 (OC<sub>Ar</sub>), 158.2 (OC<sub>Ar</sub>), 156.3 (C<sub>Ar</sub>), 156.1 (C<sub>Ar</sub>), 149.1 (C<sub>Ar</sub>), 138.1 (C<sub>Ar</sub>), 134.2 (C<sub>Ar</sub>), 129.7 (CH<sub>Ar</sub>), 127.9 (CH<sub>Ar</sub>), 127.8 (CH<sub>Ar</sub>), 125.3 (CH<sub>Ar</sub>), 122.7 (CH<sub>Ar</sub>), 120.8 (CH<sub>Ar</sub>), 115.7 (C<sub>Ar</sub>), 112.9 (C<sub>Ar</sub>), 109.1 (CH<sub>Ar</sub>), 105.2 (CH<sub>Ar</sub>), 71.7 (OCH<sub>2</sub>CH<sub>2</sub>Ph), 68.4 (OCH<sub>2</sub>CH<sub>2</sub>N), 46.3 (CH<sub>2</sub>CH<sub>2</sub>NHCON), 43.2 (OCH<sub>2</sub>CH<sub>2</sub>N), 39.9 (CH<sub>2</sub>NH<sub>3</sub><sup>+</sup>), 38.4 (CH<sub>2</sub>CH<sub>2</sub>NHCON), 34.7 (ThiazCH<sub>2</sub>CH<sub>2</sub>), 33.3 (ThiazCH<sub>2</sub>CH<sub>2</sub>), 29.8 (OCH<sub>2</sub>CH<sub>2</sub>Ph), 27.0 (CH<sub>2</sub>CH<sub>2</sub>NH<sub>3</sub><sup>+</sup>), 25.9

(TrizCH<sub>2</sub>CH<sub>2</sub>), 24.7 (TrizCH<sub>2</sub>); HPLC (*Gradient A, Agilent*): *R*<sub>t</sub> = 7.2 min; HRMS (ES, positive mode) *m/z*: calculated for C<sub>30</sub>H<sub>35</sub>N<sub>7</sub>O<sub>3</sub>S 573.2522; Found 573.2520 (-0.43 ppm); Anal. Calc. for C<sub>30</sub>H<sub>35</sub>N<sub>7</sub>O<sub>3</sub>S.TFA: C. 55.89; H. 5.28; N. 14.26; S. 4.66; Found: C. 54.96; H. 5.72; N. 13.67; S. 4.89.

**1-(2-(5-(4-(4-Ammoniumbutyl)-1H-1,2,3-triazol-1-yl)-2-(4-(2-(dibenzo[b,d]furan-1-yl)ethyl)thiazol-2-yl)phenoxy)ethyl)imidazolidin-2-one 2,2,2 trifluoroacetate (12s).**

Following the general procedure of hydrogenation, **11s** (176 mg, 0.23 mmol) was treated with Pd/C 10 % (35 mg) and TFA (1.2 mL) to give, after the work-up and purification, compound **12s** (19 mg, 13%) as a colorless oil. <sup>1</sup>H NMR (DMSO-d<sub>6</sub>, 400 MHz) δ (ppm): 8.66 (s, 1H, Ar), 8.48 (d, *J* = 8.6 Hz, 1H, Ar), 8.09 (dd, *J* = 7.7, 1.4 Hz, 1H, Ar), 8.03 (d, *J* = 1.8 Hz, 1H, Ar), 7.80 - 7.30 (m, 11H, Ar, NH<sub>3</sub><sup>+</sup>), 6.18 (br s, 1H, NHCON), 4.48 (t, *J* = 5.8 Hz, 2H, OCH<sub>2</sub>), 3.64 (t, *J* = 5.7 Hz, 2H, OCH<sub>2</sub>CH<sub>2</sub>), 3.49 (dd, *J* = 8.9, 6.8 Hz, 2H, CH<sub>2</sub>CH<sub>2</sub>NHCON), 3.27 - 3.20 (m, 4H, ThiazCH<sub>2</sub>CH<sub>2</sub>), 2.87 (t, *J* = 7.4 Hz, 2H, CH<sub>2</sub>NH<sub>3</sub><sup>+</sup>), 2.79 (t, *J* = 7.2 Hz, 2H, TrizCH<sub>2</sub>), 1.78 (quin, *J* = 7.4 Hz, 2H, TrizCH<sub>2</sub>CH<sub>2</sub>), 1.68 (quin, *J* = 7.6 Hz, 2H, CH<sub>2</sub>CH<sub>2</sub>NH<sub>3</sub><sup>+</sup>); <sup>13</sup>C NMR (CDCl<sub>3</sub>, 75 MHz) δ (ppm): 162.1 (NHCON), 159.4 (OC<sub>Ar</sub>), 155.7 (OC<sub>Ar</sub>), 155.6 (OC<sub>Ar</sub>), 155.3, (NHCOO), 154.0 (C<sub>Ar</sub>), 147.7 (C<sub>Ar</sub>), 137.9 (C<sub>Ar</sub>), 136.3 (C<sub>Ar</sub>), 129.1 (CH<sub>Ar</sub>), 128.0 (CH<sub>Ar</sub>), 127.4 (CH<sub>Ar</sub>), 123.5 (C<sub>Ar</sub>), 123.0 (CH<sub>Ar</sub>), 121.4 (C<sub>Ar</sub>), 121.0 (CH<sub>Ar</sub>), 120.5 (CH<sub>Ar</sub>), 120.4 (CH<sub>Ar</sub>), 116.1 (CH<sub>Ar</sub>), 112.0 (CH<sub>Ar</sub>), 111.6 (CH<sub>Ar</sub>), 111.2 (CH<sub>Ar</sub>), 104.3 (CH<sub>Ar</sub>), 67.6 (OCH<sub>2</sub>), 45.3 (CH<sub>2</sub>CH<sub>2</sub>NHCON), 42.4 (OCH<sub>2</sub>CH<sub>2</sub>), 38.7 (CH<sub>2</sub>NH<sub>3</sub><sup>+</sup>), 37.5 (CH<sub>2</sub>CH<sub>2</sub>NHCON), 34.7 (ThiazCH<sub>2</sub>CH<sub>2</sub>), 33.2 (ThiazCH<sub>2</sub>CH<sub>2</sub>), 26.5 (CH<sub>2</sub>CH<sub>2</sub>NH<sub>3</sub><sup>+</sup>), 25.5 (TrizCH<sub>2</sub>CH<sub>2</sub>), 24.4 (TrizCH<sub>2</sub>); HPLC (*Gradient A, Waters*): *R*<sub>t</sub> = 7.0 min; HRMS (ES, positive mode) *m/z*: calculated for C<sub>34</sub>H<sub>35</sub>N<sub>7</sub>O<sub>3</sub>S 621.2522; Found 621.2517 (-0.78 ppm); Anal. Calc. for C<sub>34</sub>H<sub>35</sub>N<sub>7</sub>O<sub>3</sub>S.TFA: C. 58.77; H. 4.93; N. 13.33; S. 4.36; Found: C. 59.15; H. 5.09; N. 13.46; S. 4.21



## Synthesis of truncated analogues 13 and 14

### **4-Bromo-2-(2-(2-oxoimidazolidin-1-yl)ethoxy)benzothioamide (A).**

Following the general procedure for the synthesis of thioamides (**8a-g**), the bromobenzonitrile **4a**<sup>1</sup> (1.15 g, 3.71 mmol) dissolved in DMF (25 mL) was treated with a solution of (NH<sub>4</sub>)<sub>2</sub>S 20% aq (17.6 mL, 0.26 mol). After the work-up, the crude was purified by flash column chromatography (CH<sub>2</sub>Cl<sub>2</sub>/MeOH, 100:2) to give thioamide **A** (845 mg, 69%) as a yellow solid. M.p.: Decompose without melting; <sup>1</sup>H NMR (DMSO-d<sub>6</sub>, 400 MHz) δ (ppm): 10.03 (br s, 1H, SCNH<sub>2</sub>), 9.35 (br s, 1H, SCNH<sub>2</sub>), 8.64 (d, *J* = 8.3 Hz, 1H, Ar), 7.31 (d, *J* = 1.9 Hz, 1H, Ar), 7.17 (dd, *J* = 8.4, 1.8 Hz, 1H, Ar), 6.35 (br s, 1H, NHCON), 4.16 (t, *J* = 5.2 Hz, 2H, OCH<sub>2</sub>), 3.47 (dd, *J* = 9.0, 6.7 Hz, 2H, CH<sub>2</sub>CH<sub>2</sub>NHCON), 3.42 (t, *J* = 5.1 Hz, 2H, OCH<sub>2</sub>CH<sub>2</sub>), 3.22 (t, *J* = 7.9 Hz, 2H, CH<sub>2</sub>CH<sub>2</sub>NHCON); <sup>13</sup>C NMR (DMSO-d<sub>6</sub>, 75 MHz) δ (ppm): 197.6 (SCNH<sub>2</sub>), 162.3 (NHCOO), 154.1 (OC<sub>Ar</sub>), 132.6 (CH<sub>Ar</sub>), 129.7 (C<sub>Ar</sub>), 123.9 (CH<sub>Ar</sub>), 123.2 (CH<sub>Ar</sub>), 115.6 (C<sub>Ar</sub>), 67.6 (OCH<sub>2</sub>), 45.6 (CH<sub>2</sub>CH<sub>2</sub>NHCON), 42.6 (OCH<sub>2</sub>CH<sub>2</sub>), 37.6 (CH<sub>2</sub>CH<sub>2</sub>NHCON); MS (ESI, positive mode) *m/z*: 346.0 [M+H]<sup>+</sup>, with a Br isotopic pattern.

### **1-(2-(2-(4-Phenethylthiazol-2-yl)-5-bromophenoxy)ethyl)imidazolidin-2-one (13).**

Following the general Hantzsch procedure, thioamide **A** (200 mg, 0.58 mmol) and commercially available 1-bromo-4-phenylbutan-2-one (132 mg, 0.58 mmol) were reacted for 4 h. After the work-up, the final residue was purified by CCTLC on the Chromatotron (CH<sub>2</sub>Cl<sub>2</sub>/MeOH, 98:2) to yield **13** (241 mg, 85%) as a white solid. M.p.: 160-162 °C; <sup>1</sup>H NMR (CDCl<sub>3</sub>, 400 MHz) δ (ppm): 8.20 (d, *J* = 8.4 Hz, 1H, Ar), 7.36 - 6.99 (m, 7H, Ar), 6.83 (s, 1H, Ar), 4.64 (br s, 1H, NHCON), 4.25 (t, *J* = 5.3 Hz, 2H, OCH<sub>2</sub>), 3.69 (t, *J* = 5.3 Hz, 2H, OCH<sub>2</sub>CH<sub>2</sub>), 3.52 (dd, *J* = 9.0, 6.7 Hz, 2H, CH<sub>2</sub>CH<sub>2</sub>NHCON), 3.31 (dd, *J* = 9.1, 6.6 Hz, 2H, CH<sub>2</sub>CH<sub>2</sub>NHCON), 3.11 - 2.97 (m, 4H, ThiazCH<sub>2</sub>CH<sub>2</sub>); <sup>13</sup>C NMR (CDCl<sub>3</sub>, 75 MHz) δ (ppm): 162.7 (NHCON), 160.6 (OC<sub>Ar</sub>), 155.9 (C<sub>Ar</sub>), 155.7 (C<sub>Ar</sub>), 141.7 (C<sub>Ar</sub>), 130.0 (CH<sub>Ar</sub>), 128.6 (CH<sub>Ar</sub>), 128.5 (CH<sub>Ar</sub>), 126.1 (CH<sub>Ar</sub>), 124.8 (CH<sub>Ar</sub>), 124.0 (C<sub>Ar</sub>), 121.9 (C<sub>Ar</sub>), 115.9

(CH<sub>Ar</sub>), 114.9 (CH<sub>Ar</sub>), 68.5 (OCH<sub>2</sub>), 46.7 (CH<sub>2</sub>CH<sub>2</sub>NHCON), 43.3 (OCH<sub>2</sub>CH<sub>2</sub>), 38.5 (CH<sub>2</sub>CH<sub>2</sub>NHCON), 35.7 (ThiazCH<sub>2</sub>CH<sub>2</sub>), 33.5 (ThiazCH<sub>2</sub>CH<sub>2</sub>); HPLC (*Gradient A, Agilent*): *R*<sub>t</sub> = 9.9 min; HRMS (ES, positive mode) *m/z*: calculated for C<sub>22</sub>H<sub>22</sub>BrN<sub>3</sub>O<sub>2</sub>S 471.0616; Found 471.0622 (1.32 ppm); Anal. Calc. for C<sub>22</sub>H<sub>22</sub>BrN<sub>3</sub>O<sub>2</sub>S: C. 55.94; H. 4.69; N. 8.90; S. 6.79; Found: C. 55.77; H. 4.73; N. 8.71; S. 6.62.

**4-(4-(4-Ammoniobutyl)-1H-1,2,3-triazol-1-yl)-2-(2-(2-oxoimidazolidin-1-yl)ethoxy)**

**benzonitrile bis(2,2,2 trifluoroacetate) (14).** A solution of **7a** (5 mg, 0.01 mmol) in CH<sub>2</sub>Cl<sub>2</sub> (3 mL) was treated with TFA (0.3 mL) for 2 h at room temperature. Volatiles were removed and the crude was co-evaporated several times with CH<sub>2</sub>Cl<sub>2</sub>/MeOH (5 x 10 mL). The final residue was purified HPFC on a SP1 Isolera Biotage using reverse phase columns (From 0% of CH<sub>3</sub>CN to 100% of CH<sub>3</sub>CN in 45 min) to yield **14** (3 mg, 60%) as a colorless oil. <sup>1</sup>H NMR (DMSO-d<sub>6</sub>, 500 MHz) δ (ppm): 8.80 (s, 1H, Ar), 7.97 (d, *J* = 8.4 Hz, 1H, Ar), 7.76 (d, *J* = 1.9 Hz, 1H, Ar), 7.67 (dd, *J* = 8.5, 1.9 Hz, 1H, Ar), 7.40 - 6.65 (m, 3H, NH<sub>3</sub><sup>+</sup>), 6.42 (br s, 1H, NHCON), 4.37 (t, *J* = 5.3 Hz, 2H, OCH<sub>2</sub>), 3.55 (dd, *J* = 8.9, 6.8 Hz, 2H, CH<sub>2</sub>CH<sub>2</sub>NHCON), 3.50 (t, *J* = 5.3 Hz, 2H, OCH<sub>2</sub>CH<sub>2</sub>), 3.25 (t, *J* = 7.9 Hz, 2H, CH<sub>2</sub>CH<sub>2</sub>NHCON), 2.82 - 2.72 (m, 4H, CH<sub>2</sub>NH<sub>3</sub><sup>+</sup>, TrizCH<sub>2</sub>), 1.72 (quin, *J* = 7.5 Hz, 2H, TrizCH<sub>2</sub>CH<sub>2</sub>), 1.57 (quin, *J* = 7.8 Hz, 2H, CH<sub>2</sub>CH<sub>2</sub>NH<sub>3</sub><sup>+</sup>); <sup>13</sup>C NMR (DMSO-d<sub>6</sub>, 125 MHz) δ (ppm): 162.1 (NHCON), 161.1 (OC<sub>Ar</sub>), 148.1 (C<sub>Ar</sub>), 141.1 (C<sub>Ar</sub>), 135.4 (CH<sub>Ar</sub>), 120.6 (CH<sub>Ar</sub>), 115.7 (CN), 111.9 (CH<sub>Ar</sub>), 104.1 (CH<sub>Ar</sub>), 100.0 (C<sub>Ar</sub>), 68.8 (OCH<sub>2</sub>), 46.0 (CH<sub>2</sub>CH<sub>2</sub>NHCON), 42.4 (OCH<sub>2</sub>CH<sub>2</sub>), 40.0 (CH<sub>2</sub>NH<sub>3</sub><sup>+</sup>), 37.6 (CH<sub>2</sub>CH<sub>2</sub>NHCON), 27.8 (CH<sub>2</sub>CH<sub>2</sub>NH<sub>3</sub><sup>+</sup>), 25.6 (TrizCH<sub>2</sub>CH<sub>2</sub>), 24.5 (TrizCH<sub>2</sub>); HPLC (*Gradient A, Agilent*): *R*<sub>t</sub> = 4.8 min; HRMS (ES, positive mode) *m/z*: calculated for C<sub>18</sub>H<sub>23</sub>N<sub>7</sub>O<sub>2</sub> 369.1913; Found 369.1904 (-2.65 ppm); Anal. Calc. for C<sub>20</sub>H<sub>24</sub>F<sub>3</sub>N<sub>7</sub>O<sub>4</sub>: C. 49.69; H. 5.00; N. 20.28; Found: C. 49.90; H. 4.68; N. 19.84.

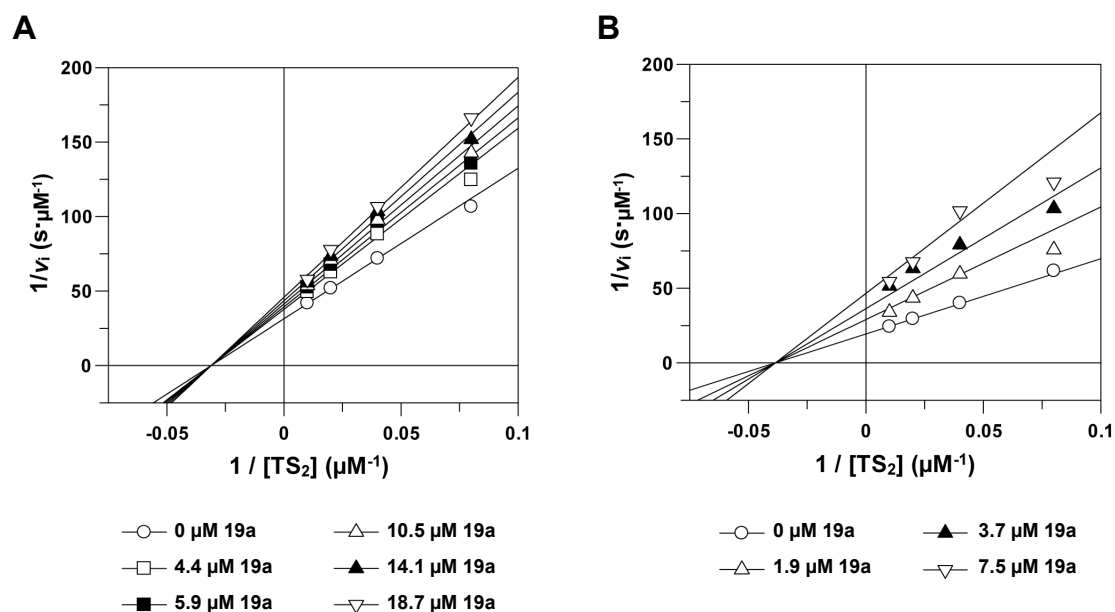

**Figure S1.** Noncompetitive hyperbolic inhibition of *L*/TryR by **19a**. Initial velocities were used for determination of the  $K_i$  value and assessment of the inhibition modality of **19a** by two different methods: DTNB-coupled assay (absorbance readings at 412 nm) (A) and trypanothione-dependent NADPH oxidation assay (absorbance readings at 340 nm) (B). Lineweaver–Burk plots of reciprocal initial velocities ( $v_i$ ) versus reciprocals of four  $TS_2$  concentrations (12.5, 25, 50 and 100  $\mu\text{M}$ ) are shown. Experimental conditions in both experiments were similar to those described in the experimental section except that for the NADPH oxidation assay NADPH concentration was raised to 500  $\mu\text{M}$ ,  $\text{NADP}^+$  to 100  $\mu\text{M}$  and 4.8 mM of oxidized glutathione was added. Data were fitted using the hyperbolic noncompetitive-mode equation described by Leskovac:

$$1/v = 1/V_{\max} \times (\alpha K_i + [I] / \alpha K_i + \beta [I]) + \alpha K_m / V_{\max} \times (K_i + [I] / \alpha K_i + \beta [I]) \times 1/[S].^2$$

Results of the fits are shown in Table S1.

**Table S1.** Estimation of  $\beta$  and  $K_i$  in the noncompetitive hyperbolic inhibition mechanism by **19a**.

| Parameters                               | DTNB-coupled assay | NADPH oxidation assay |
|------------------------------------------|--------------------|-----------------------|
| $K_i$ ( $\mu\text{M}$ ) <sup>&amp;</sup> | 12.7 ± 3.5         | 2.5 ± 0.7             |
| $\beta$ <sup>&amp;</sup>                 | 0.5 ± 0.1          | 0.2 ± 0.1             |

<sup>&</sup> Estimated values ± standard error of  $K_i$  and  $\beta$  were obtained by fitting the  $v_i$  values for every **19a** concentration at the different  $TS_2$  concentrations using an alpha value of 1.

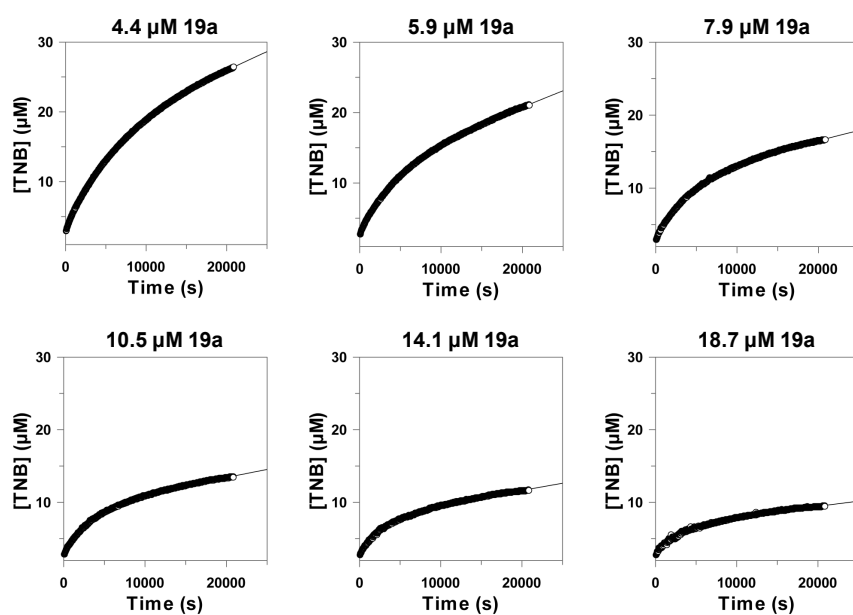

**Figure S2.** **19a** concentration dependence of the observed rate constant for *L*/TryR inactivation at 3.1 μM TS<sub>2</sub>. Progress curves for *L*/TryR enzymatic reactions in the presence of increasing concentrations of **19a** were fitted to Equation 1. Data are the results obtained in a representative assay from three independent experiments. The estimated  $k_{\text{obs}}$  values are shown in Table S2.

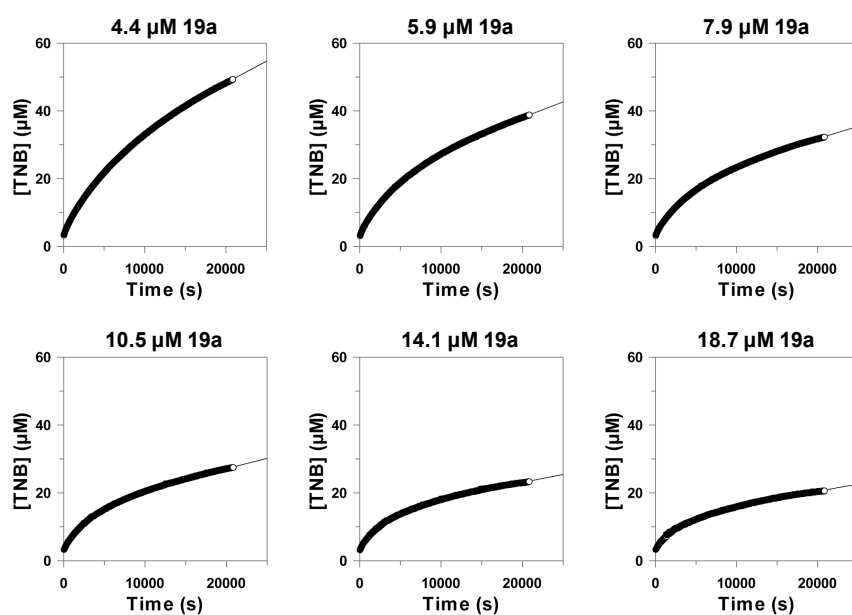

**Figure S3.** **19a** concentration dependence of the observed rate constant for *L*/TryR inactivation at 6.2 μM TS<sub>2</sub>. Progress curves for *L*/TryR enzymatic reactions in the presence of increasing concentrations of **19a** were fitted to Equation 1. Data are the results obtained in a representative assay from three independent experiments. The estimated  $k_{\text{obs}}$  values are shown in Table S2.

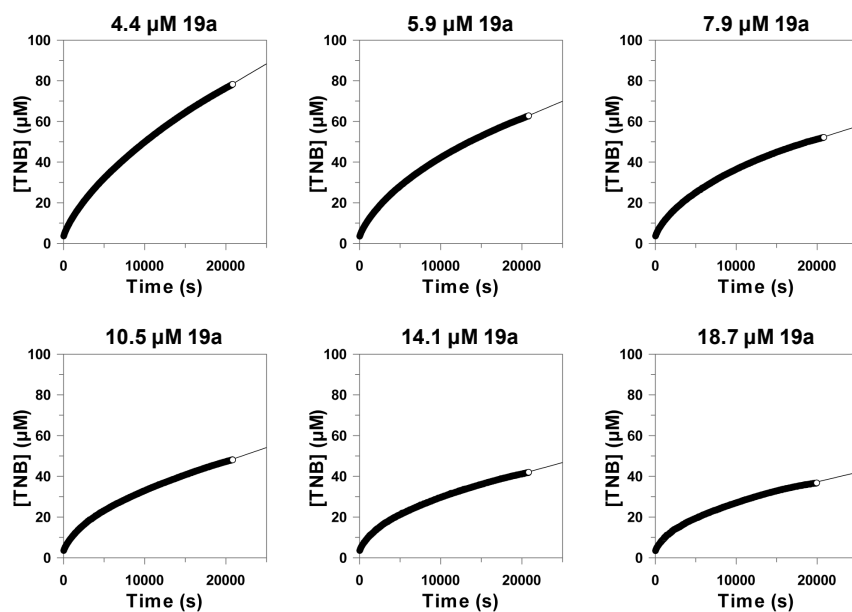

**Figure S4.** **19a** concentration dependence of the observed rate constant for *L*/TryR inactivation at 12.5 μM TS<sub>2</sub>. Progress curves for *L*/TryR enzymatic reactions in the presence of increasing concentrations of **19a** were fitted to Equation 1. Data are the results obtained in a representative assay from three independent experiments. The estimated  $k_{obs}$  values are shown in Table S2.

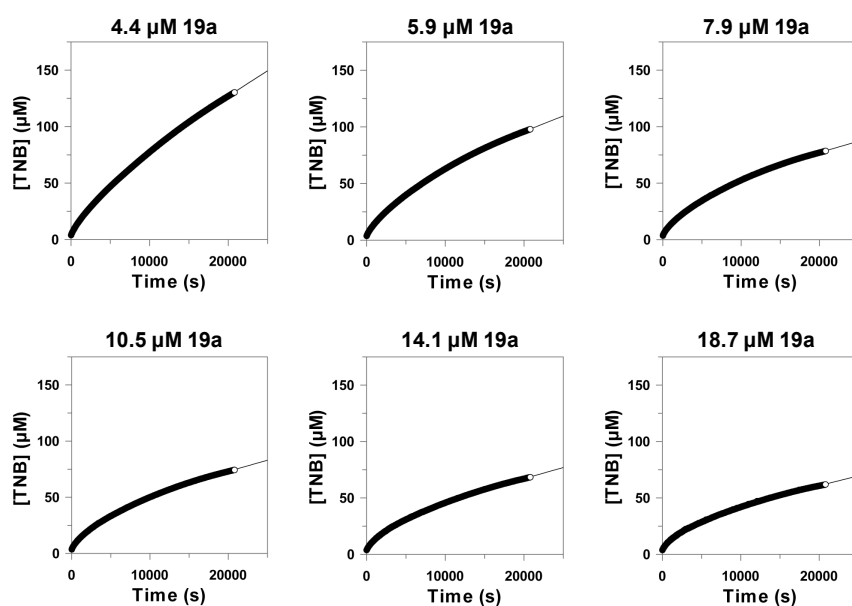

**Figure S5.** **19a** concentration dependence of the observed rate constant for *L*/TryR inactivation at 25 μM TS<sub>2</sub>. Progress curves for *L*/TryR enzymatic reactions in the presence of increasing concentrations of **19a** were fitted to Equation 1. Data are the results obtained in a representative assay from three independent experiments. The estimated  $k_{\text{obs}}$  values are shown in Table S2.

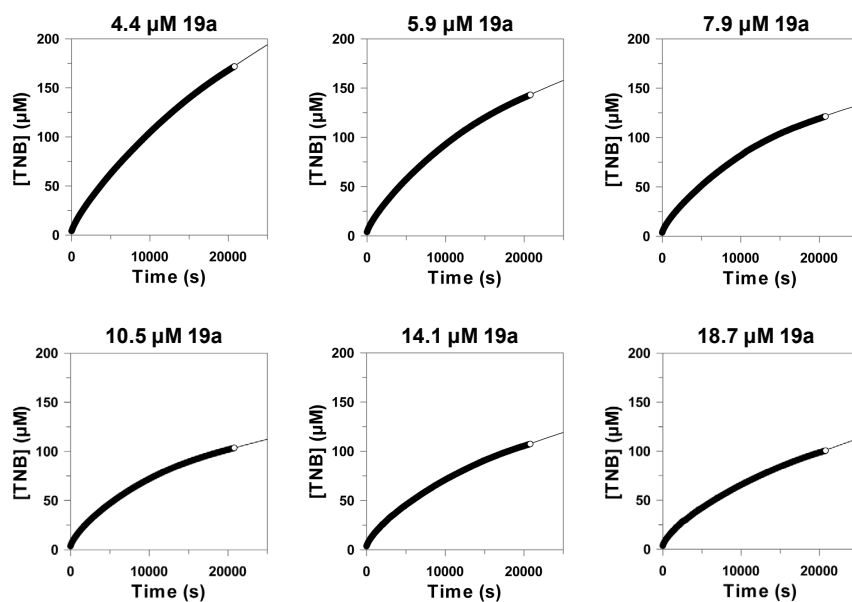

**Figure S6.** **19a** concentration dependence of the observed rate constant for *L/TryR* inactivation at 50  $\mu\text{M}$   $\text{TS}_2$ . Progress curves for *L/TryR* enzymatic reactions in the presence of increasing concentrations of **19a** were fitted to Equation 1. Data are the results obtained in a representative assay from three independent experiments. The estimated  $k_{\text{obs}}$  values are shown in Table S2.

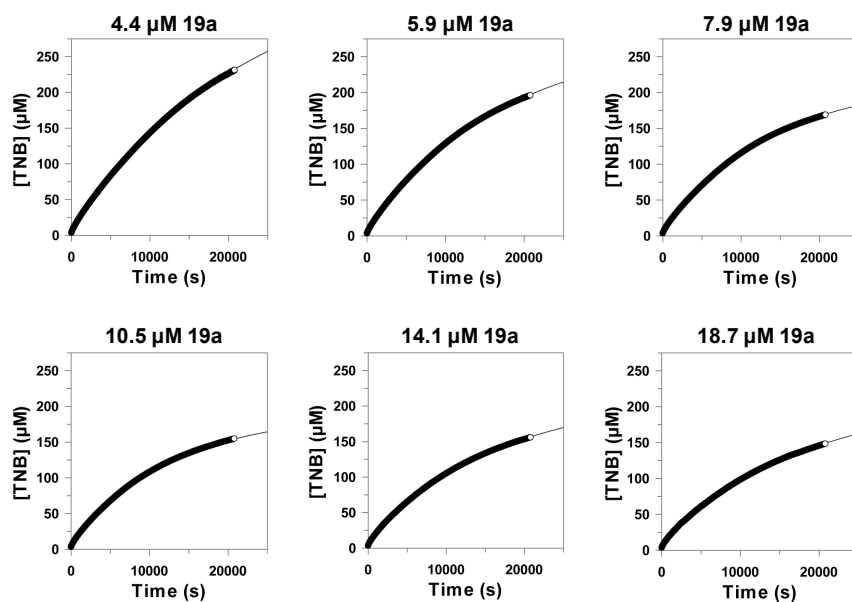

**Figure S7.** **19a** concentration dependence of the observed rate constant for *L/TryR* inactivation at 100  $\mu\text{M}$   $\text{TS}_2$ . Progress curves for *L/TryR* enzymatic reactions in the presence of increasing concentrations of **19a** were fitted to Equation 1. Data are the results obtained in a representative assay from three independent experiments. The estimated  $k_{\text{obs}}$  values are shown in Table S2.



**Table S2. Rate constants for *L*TryR time-dependent inhibition by **19a** at different  $\text{TS}_2$  concentrations.**  $k_{\text{obs}}$  values for each **19a** concentration were obtained by fitting to Equation 1 the progress curves shown in Figures S2-S7. Results are the estimated values from the non-linear regression  $\pm$  the associated standard errors.

| [19a] ( $\mu\text{M}$ ) | $k_{\text{obs}}$ ( $\text{s}^{-1}$ )        |                                             |                                             |                                             |                                             |                                             |
|-------------------------|---------------------------------------------|---------------------------------------------|---------------------------------------------|---------------------------------------------|---------------------------------------------|---------------------------------------------|
|                         | 3.1 $\mu\text{M}$ $\text{TS}_2$             | 6.2 $\mu\text{M}$ $\text{TS}_2$             | 12.5 $\mu\text{M}$ $\text{TS}_2$            | 25 $\mu\text{M}$ $\text{TS}_2$              | 50 $\mu\text{M}$ $\text{TS}_2$              | 100 $\mu\text{M}$ $\text{TS}_2$             |
| 4,4                     | $1.5 \times 10^{-4} \pm 9.8 \times 10^{-7}$ | $1.6 \times 10^{-4} \pm 1.2 \times 10^{-6}$ | $1.7 \times 10^{-4} \pm 1.8 \times 10^{-6}$ | $1.4 \times 10^{-4} \pm 2.3 \times 10^{-6}$ | $9.4 \times 10^{-5} \pm 1.5 \times 10^{-6}$ | $6.0 \times 10^{-5} \pm 6.2 \times 10^{-7}$ |
| 5,9                     | $2.1 \times 10^{-4} \pm 1.1 \times 10^{-6}$ | $2.0 \times 10^{-4} \pm 1.1 \times 10^{-6}$ | $1.9 \times 10^{-4} \pm 1.6 \times 10^{-6}$ | $1.4 \times 10^{-4} \pm 1.8 \times 10^{-6}$ | $9.4 \times 10^{-5} \pm 1.2 \times 10^{-6}$ | $7.9 \times 10^{-5} \pm 6.3 \times 10^{-7}$ |
| 7,9                     | $2.2 \times 10^{-4} \pm 1.6 \times 10^{-6}$ | $2.2 \times 10^{-4} \pm 1.4 \times 10^{-6}$ | $1.9 \times 10^{-4} \pm 1.9 \times 10^{-6}$ | $1.5 \times 10^{-4} \pm 2.0 \times 10^{-6}$ | $1.0 \times 10^{-4} \pm 1.1 \times 10^{-6}$ | $8.4 \times 10^{-5} \pm 6.3 \times 10^{-7}$ |
| 10,5                    | $2.7 \times 10^{-4} \pm 2.0 \times 10^{-6}$ | $2.7 \times 10^{-4} \pm 1.7 \times 10^{-6}$ | $2.8 \times 10^{-4} \pm 2.3 \times 10^{-6}$ | $1.7 \times 10^{-4} \pm 2.4 \times 10^{-6}$ | $1.3 \times 10^{-4} \pm 1.4 \times 10^{-6}$ | $9.4 \times 10^{-5} \pm 5.6 \times 10^{-7}$ |
| 14,1                    | $3.1 \times 10^{-4} \pm 3.6 \times 10^{-6}$ | $2.8 \times 10^{-4} \pm 2.7 \times 10^{-6}$ | $2.7 \times 10^{-4} \pm 2.8 \times 10^{-6}$ | $2.1 \times 10^{-4} \pm 2.9 \times 10^{-6}$ | $1.3 \times 10^{-4} \pm 2.0 \times 10^{-6}$ | $9.0 \times 10^{-5} \pm 1.1 \times 10^{-6}$ |
| 18,7                    | $2.9 \times 10^{-4} \pm 5.1 \times 10^{-6}$ | $2.8 \times 10^{-4} \pm 3.7 \times 10^{-6}$ | $2.5 \times 10^{-4} \pm 4.2 \times 10^{-6}$ | $2.2 \times 10^{-4} \pm 3.3 \times 10^{-6}$ | $1.5 \times 10^{-4} \pm 2.5 \times 10^{-6}$ | $8.8 \times 10^{-5} \pm 1.5 \times 10^{-6}$ |

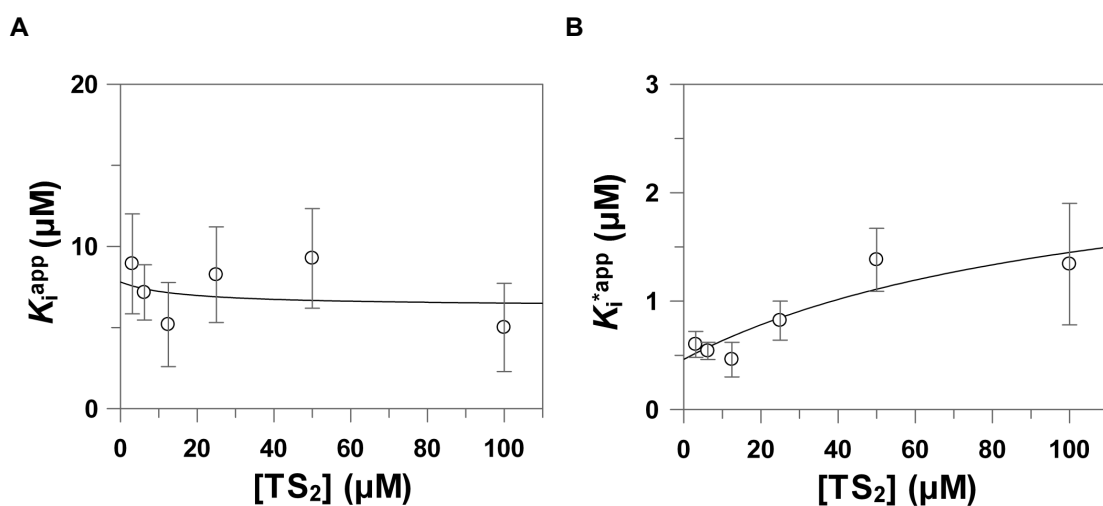

**Figure S8.** Effect of substrate concentration on the apparent inhibition constants  $K_i^{\text{app}}$  and  $K_i^{*\text{app}}$  upon binding of **19a** to *L*TryR. (A) Plot of the estimated values of  $K_i^{\text{app}}$  ( $\pm$  SE) as a function of  $\text{TS}_2$  concentration. The curve was fitted using Equation 3. (B) Plot of the estimated values of  $K_i^{*\text{app}}$  ( $\pm$  SE) as a function of  $\text{TS}_2$  concentration. The curve was fitted using Equation 4.

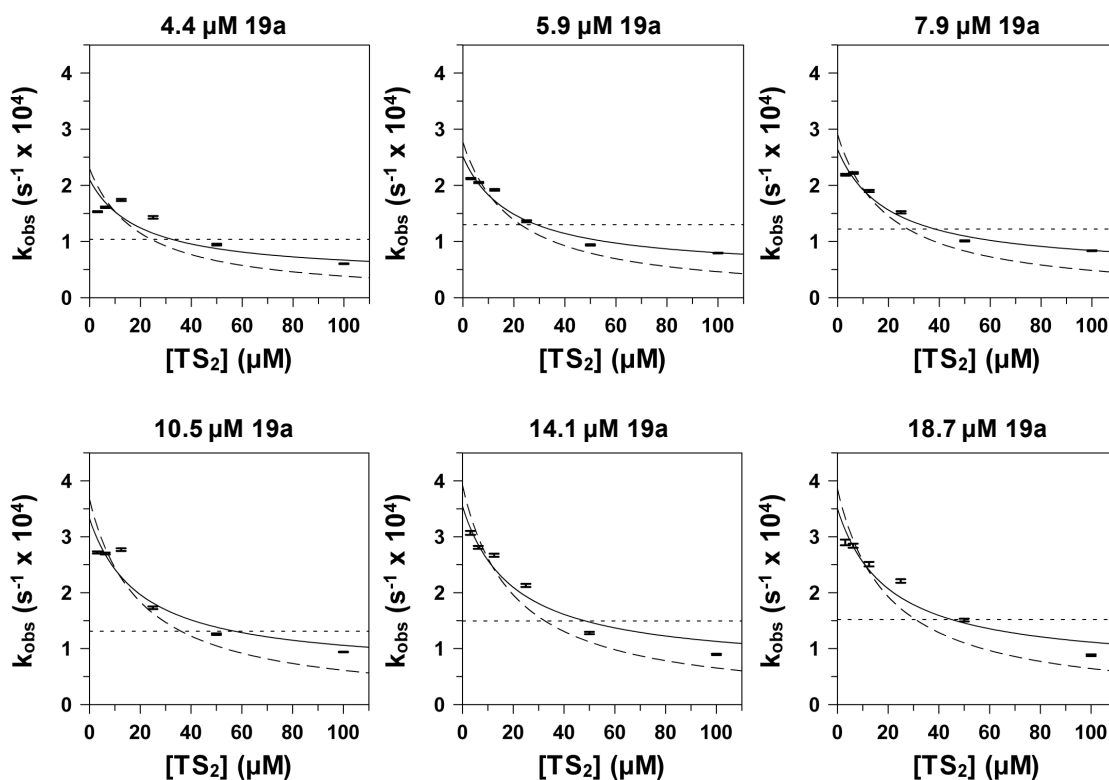

**Figure S9.** Effect of  $\text{TS}_2$  concentration on the rate of *L*/TryR inactivation. Plot of the  $k_{\text{obs}}$  values ( $\pm$  standard errors) as a function of  $\text{TS}_2$  concentration at six different **19a** concentrations (4.4, 5.9, 7.9, 10.5, 14.1 and 18.7  $\mu\text{M}$ ). Curves for competitive inhibition (dashed line) were fitted using the following equation:  $k_{\text{obs}} = k / [1 + ([S] / K_m)]$ .<sup>3,4</sup> Curves for pure (dotted line;  $\alpha = 1$ ) and mixed (solid line;  $\alpha = 5$ ) noncompetitive inhibition were fitted using the following equation:  $k_{\text{obs}} = [k \times (K_m + ([S] / \alpha))] / (K_m + S)$ .<sup>5</sup>

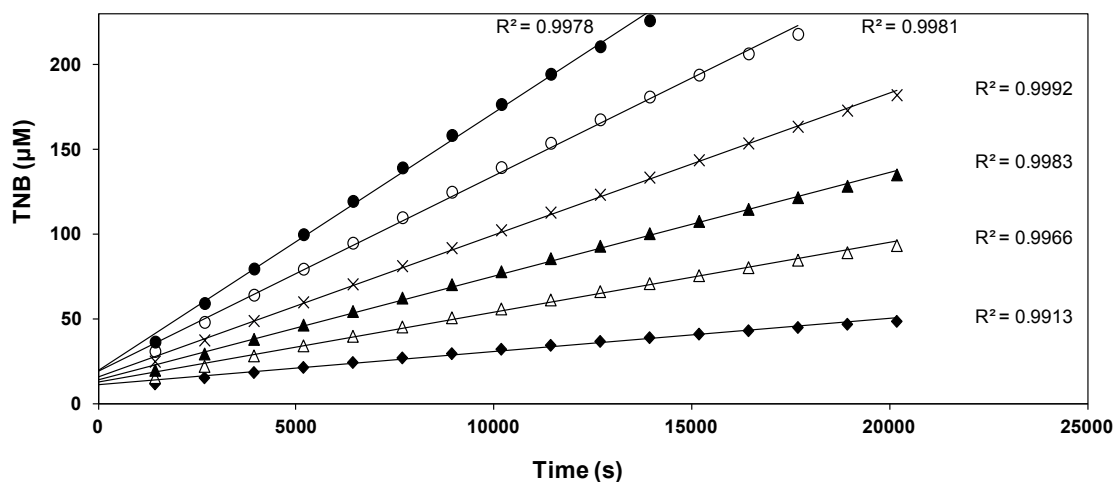

**Figure S10.** Progress curves for *L*/TryR enzymatic reactions in the absence of inhibitor at six different concentrations of TS<sub>2</sub>: 3.1 μM (◆), 6.2 μM (△), 12.5 μM (▲), 25 μM (×), 50 μM (○) and 100 μM (●). Reaction progress curves were fitted to a linear trend line and R<sup>2</sup> values of each fit are shown in the figure. Oxidoreductase reactions were performed in a buffer containing 40 mM HEPES pH 7.5, 0.8 nM *L*/TryR, 1 mM EDTA, 300 μM NADPH, 60 μM NADP<sup>+</sup>, 150 μM DTNB and 3.1 - 100 μM TS<sub>2</sub>.

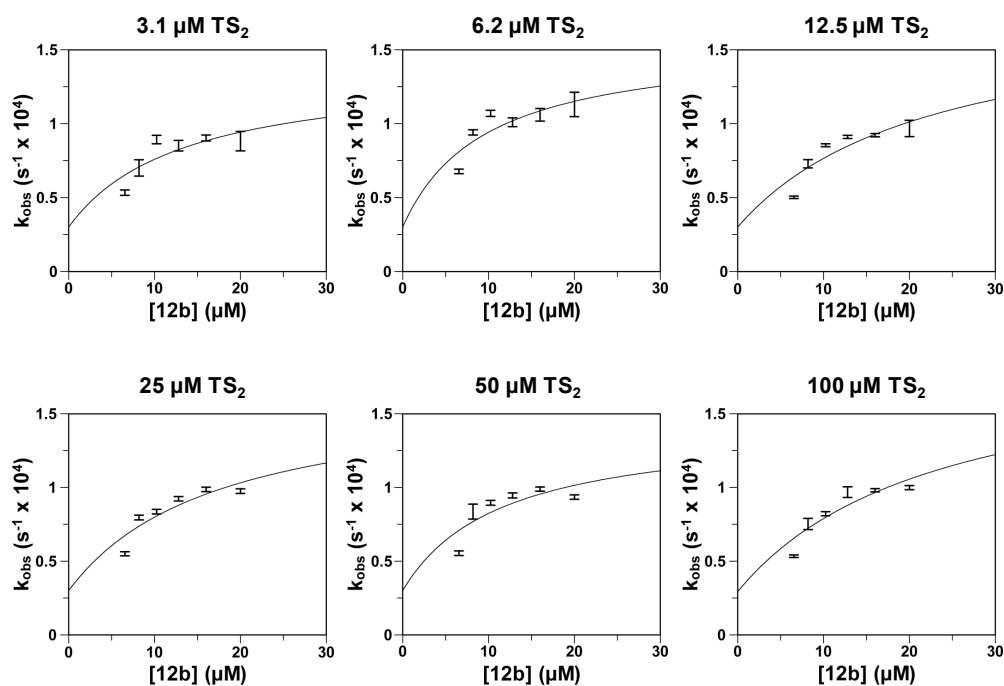

**Figure S11.** *L/TryR* inhibition by **12b**. Concentration dependence of the observed rate constants of *L/TryR* inactivation by **12b** at different  $TS_2$  concentrations. Plot of the  $k_{obs}$  values ( $\pm$  standard errors) as a function of inhibitor concentration at six different  $TS_2$  concentrations (3.1, 6.2, 12.5, 25, 50 and 100  $\mu M$ ). Data for *L/TryR* inactivation by **12b** were fitted using Equation 2 that describes the enzyme isomerization mechanism of time-dependent inhibition.

**Table S3.** Estimation of the kinetic parameters of *L*/TryR inactivation by **12b** in the reversible two-step mechanism of time-dependent inhibition (Scheme 4).

| Parameters                               | 12b            |
|------------------------------------------|----------------|
| $K_i$ ( $\mu\text{M}$ ) <sup>&amp;</sup> | $10.0 \pm 2.7$ |
| $\alpha$ <sup>&amp;</sup>                | $2.0 \pm 1.3$  |
| $K_i^*$ ( $\mu\text{M}$ ) <sup>#</sup>   | $2.6 \pm 0.6$  |
| $\alpha^*$ <sup>#</sup>                  | $1.3 \pm 0.6$  |

<sup>&</sup> Estimated values  $\pm$  standard error of  $K_i$  and  $\alpha$  for the first rapid equilibrium that generates the EI complex (Scheme 4). Both values were estimated by fitting to Equation 3 the  $K_i^{\text{app}}$  values obtained at six different  $\text{TS}_2$  concentrations (3.1, 6.2, 12.5, 25, 50 and 100  $\mu\text{M}$ ) using Equation 2.

<sup>#</sup> Estimated values  $\pm$  standard error of  $K_i^*$  and  $\alpha^*$  for the overall two-step mechanism of time-dependent inactivation of *L*/TryR (Scheme 4). Both values were estimated by fitting to Equation 4 the  $K_i^{*\text{app}}$  values obtained at six different  $\text{TS}_2$  concentrations (3.1, 6.2, 12.5, 25, 50 and 100  $\mu\text{M}$ ) using Equation 2.

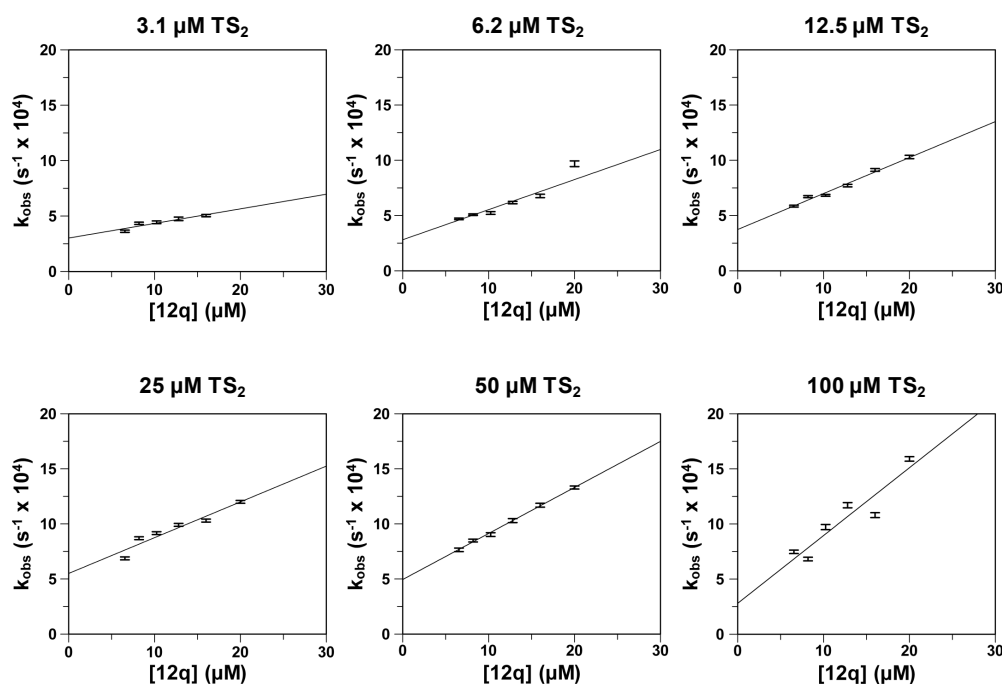

**Figure S12.** *L/TryR* inhibition by **12q**. Concentration dependence of the observed rate constants of *L/TryR* inactivation by **12q** at different  $TS_2$  concentrations. Plot of the  $k_{obs}$  values ( $\pm$  standard errors) as a function of inhibitor concentration at six different  $TS_2$  concentrations (3.1, 6.2, 12.5, 25, 50 and 100  $\mu M$ ). Data for *L/TryR* inactivation by **12q** were fitted using the following equation:  $k_{obs} = k_4 \times (1 + [I] / K_i^{app})$  that describes the simple reversible mechanism of slow binding of inhibition.<sup>3</sup>

**Table S4.** Estimation of the kinetic parameters of *L/TryR* inhibition by **12q** in the reversible single-step mechanism of time-dependent inhibition (Scheme S4).

| Parameters          | <b>12q</b>     |
|---------------------|----------------|
| $K_i$ ( $\mu M$ ) & | $13.6 \pm 5.1$ |
| $\alpha$ &          | $0.3 \pm 0.2$  |

& Estimated values  $\pm$  standard error of  $K_i$  and  $\alpha$  for the slow and reversible equilibrium that generates the EI complex (Scheme S4). Both values were estimated by fitting to Equation 3 the  $K_i^{app}$  values obtained at six different  $TS_2$  concentrations using the equation for time-dependent inhibitors with a single-step binding mechanism.

**Scheme S4.** Reversible single-step mechanism of time-dependent inhibition of *L*TryR by **12q**<sup>&</sup>

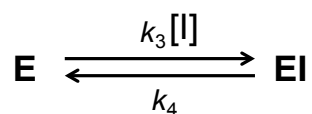

<sup>&</sup> A slow and reversible equilibrium between enzyme and inhibitor is governed by association and dissociation rate constants ( $k_3$  and  $k_4$ , respectively).

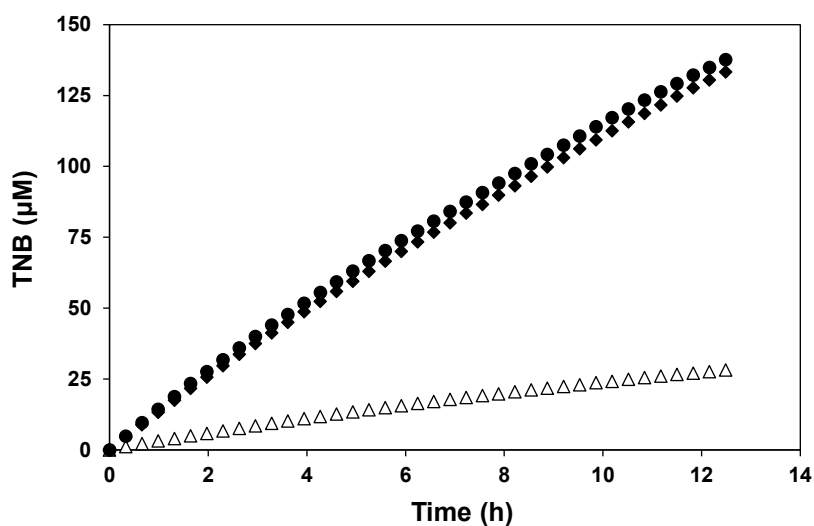

**Figure S13.** Residual activity of *L*TryR after incubation with **19a**. *L*TryR (400 nM) was incubated during 16 h in the absence of inhibitor (◆) or in the presence of 25 μM of mepacrine (●) or **19a** (△). Samples were diluted (2500-fold) and residual activity was evaluated. Oxidoreductase reactions were performed in a buffer containing 40 mM HEPES pH 7.5, 1 mM EDTA, 300 μM NADPH, 60 μM NADP<sup>+</sup>, 150 μM DTNB and 100 μM TS<sub>2</sub>.

**Scheme S5.** Global mechanism for *L*TryR inactivation in the presence of substrate (S) and slow-binding inhibitors (I) **12b-c**, **12r-s** and **19a**. E\*I is a conformationally inactive form of E produced through a slow process governed by the forward isomerization rate ( $k_5$ ) and the very small reverse rate constant ( $k_6$ ).

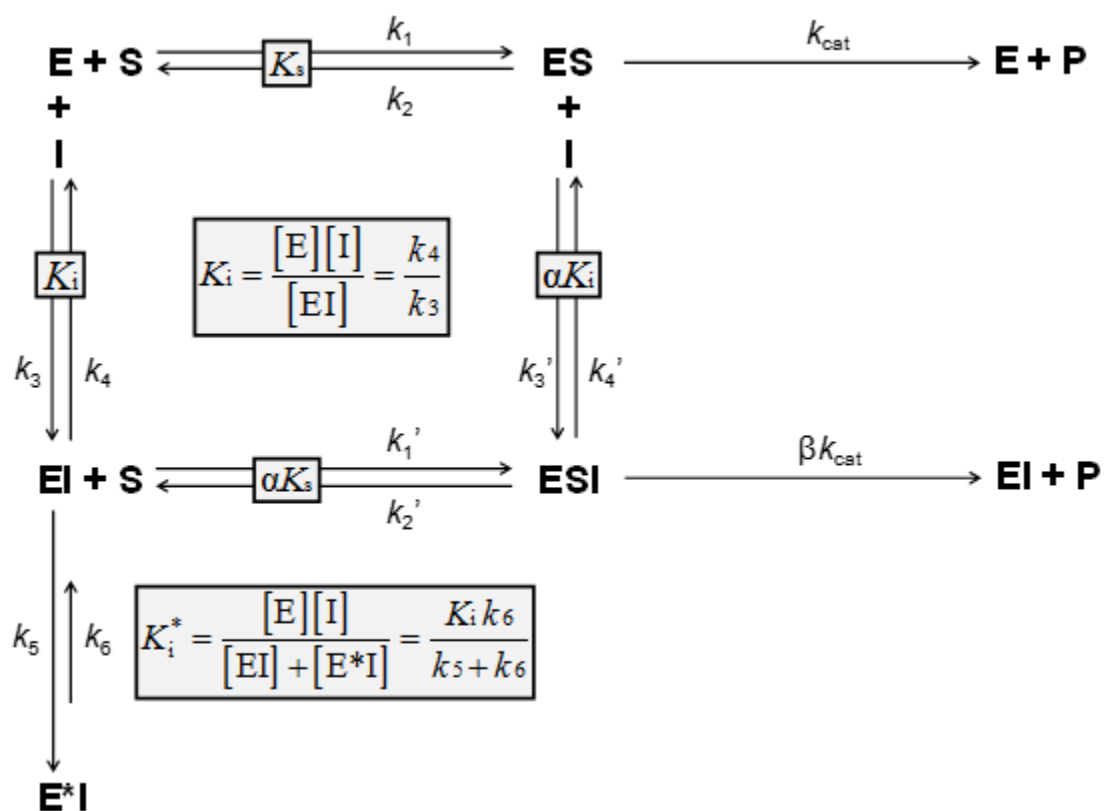



### Screening for PAINS

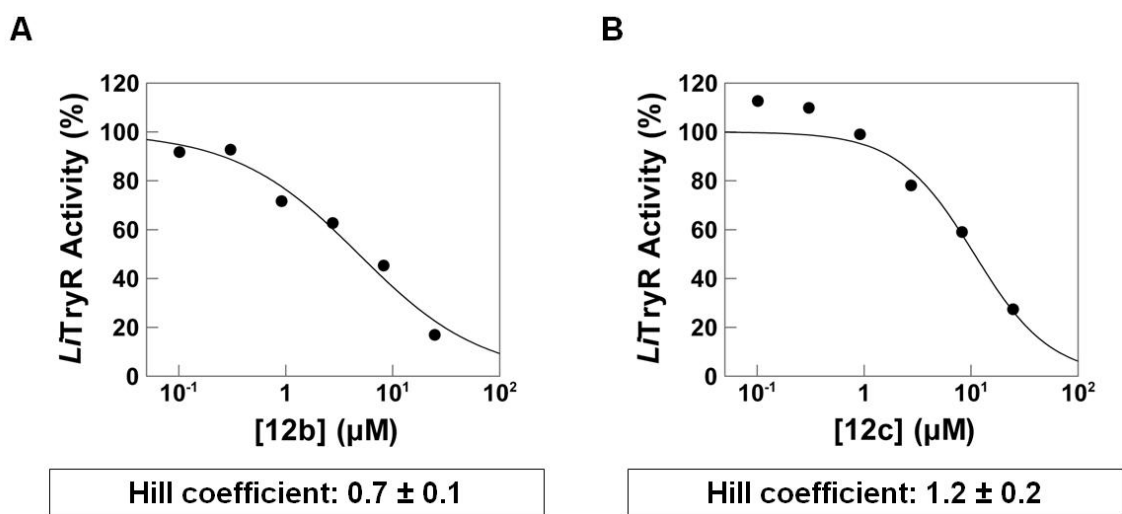

**Figure S14.** Concentration–response curves of representative triazole-based compounds **12b** (A) and **12c** (B). Hill coefficients are indicated in the boxes.

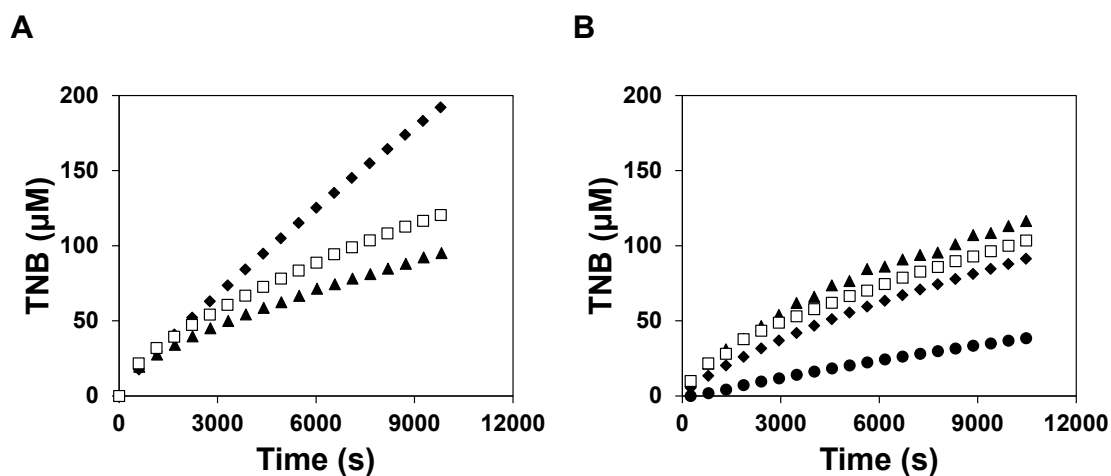

**Figure S15.** Oxidoreductase activity of *L*/TryR and hGR in the presence of 50  $\mu\text{M}$   $\text{TS}_2$  or GSSG, respectively. (A) Reaction progress curves of *L*/TryR (0.8 nM) in the absence ( $\blacklozenge$ ) and in the presence 25  $\mu\text{M}$  **12b** ( $\blacktriangle$ ) and 25  $\mu\text{M}$  **12c** ( $\square$ ). (B) Reaction progress curves of hGR (7 nM) in the absence ( $\blacklozenge$ ) and in the presence of 25  $\mu\text{M}$  nifurtimox ( $\bullet$ ), 25  $\mu\text{M}$  **12b** ( $\blacktriangle$ ) and 25  $\mu\text{M}$  **12c** ( $\square$ ).

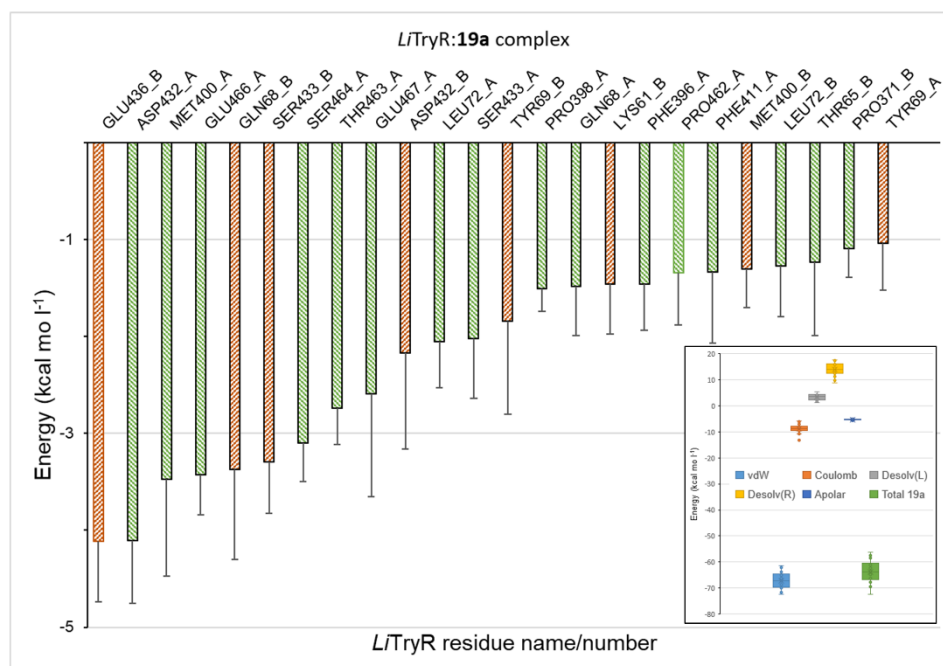

**Figure S16.** Calculated average ( $\pm$  standard error) contributions of individual *L*/TryR residues (monomers A and B in red and green, respectively) to the overall solvent-corrected interaction energy ( $\text{kcal mol}^{-1}$ ) with **19a**. For simplicity, a cutoff of 1.0 was used. The averages were calculated from a conformational ensemble made up of 20 snapshots taken every 5 ns from the post-equilibrated 10–110 ns interval of the molecular dynamics trajectories and then cooled down to 273 K and energy minimized.

Inset: Box-and-whisker plots of the calculated total interaction energies (green,  $\text{kcal mol}^{-1}$ ) and component contributions [DOI 10.1021/ct300497z]<sup>6</sup> (van der Waals (light blue), electrostatic (orange), ligand desolvation (grey), receptor desolvation (yellow), and apolar (dark blue) for the binding of **19a** to *L*/TryR.

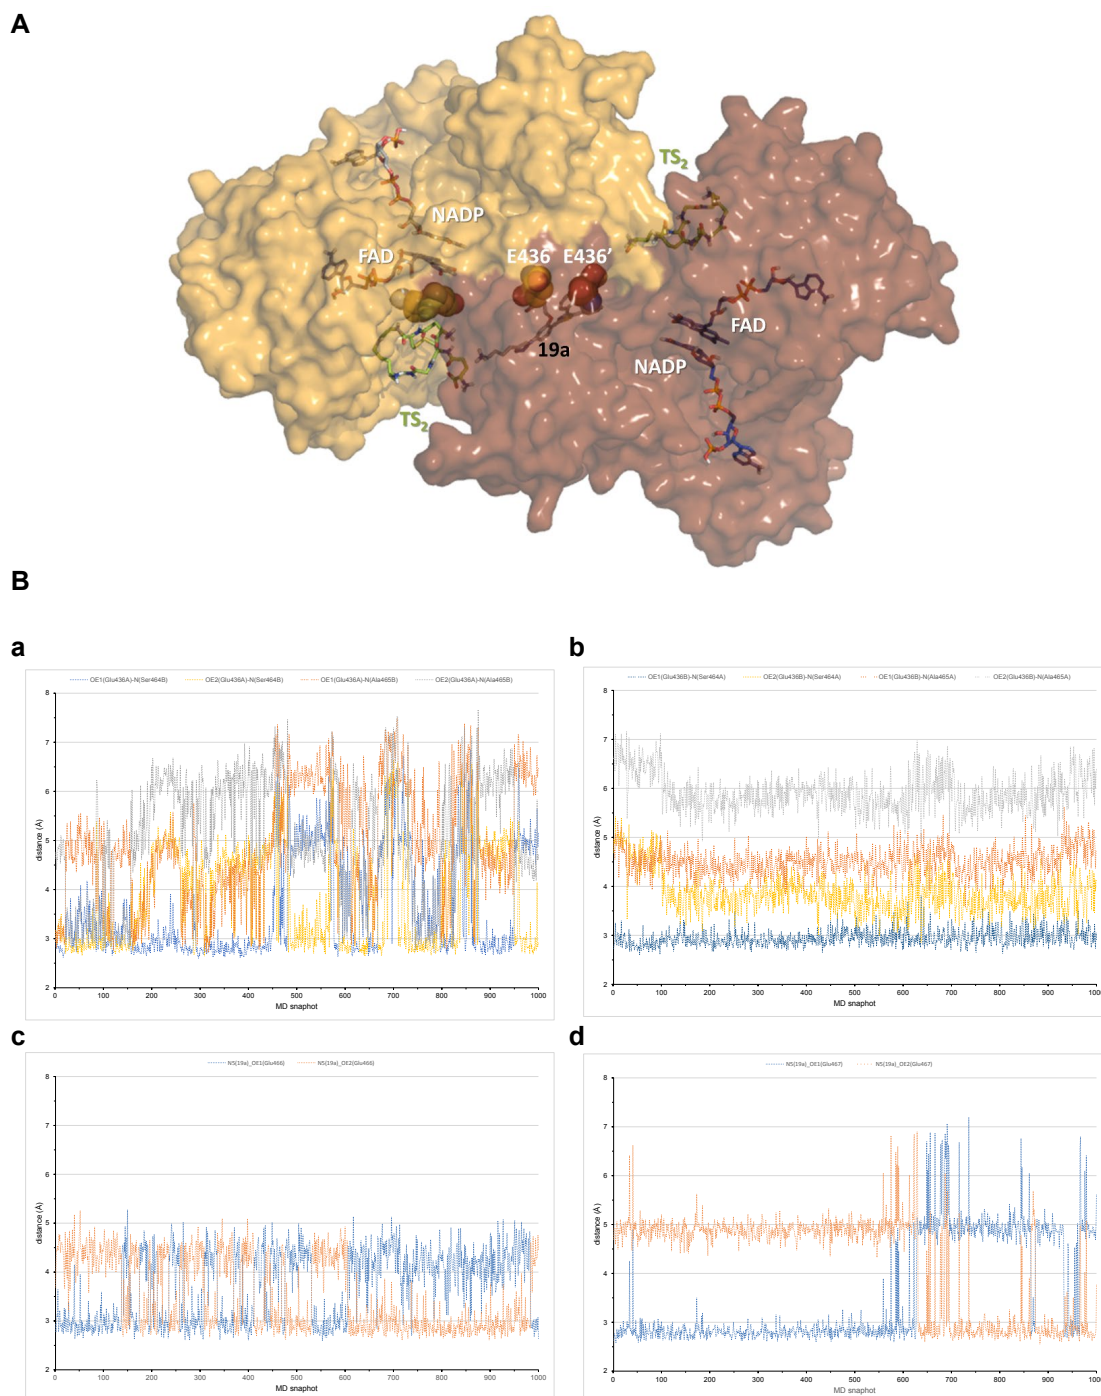

**Figure S17. A.** Theoretical model of *LiTryR* (enveloped in a semi-transparent surface) in complex with **19a** (sticks) bound in the central interfacial cavity. Each monomer is colored differently and both the flavin adenine dinucleotide (FAD) prosthetic group and the NADP cofactor are displayed as sticks for reference. In addition, two TS2 molecules (sticks, with C atoms in olive) have been included in the active site (as found in PDB entry 1BZL<sup>7</sup>) to highlight that the proposed inhibitor-binding site is separate from it and there is no overlap between the two. The atoms shown as spheres belong to the active site Cys52 and Cys57 in one active site (*left*) and the dimerization hotspot Glu436 residues from both subunits.

**B.** Monitoring of relevant distances shows the **19a**-induced disruptions in hydrogen bonds involving the Glu436 carboxylates OE1 and OE2 that are essential for enzyme dimerization (**a,b**), and the establishment of stable hydrogen bonds between OE1 and OE2 of Glu466 with the amino group of **19a** throughout the MD trajectory.

**Table S5.** Residues making up the interfacial cavity present in trypanothione-disulfide reductases (TryRs) from trypanosomatids and positionally equivalent residues in human glutathione-disulfide reductase (hGR). The overall lack of identity in several crucial regions is in consonance with the observed marked selectivity for *L*TryR.

| <i>L</i> TryR | <i>Leishmania sp./Trypanosoma sp.</i> TryR | Human GR |
|---------------|--------------------------------------------|----------|
| Lys61         | lysine                                     | Lys65    |
| Thr65         | threonine                                  | Asn71    |
| Gln68         | glutamine                                  | Val74    |
| Tyr69         | tyrosine                                   | His75    |
| Leu72         | leucine/threonine/histidine                | Phe78    |
| Pro371        | proline                                    | Pro376   |
| Phe396        | phenylalanine                              | Phe403   |
| Pro398        | proline                                    | Pro405   |
| Met400        | methionine                                 | Tyr407   |
| Phe411        | phenylalanine                              | Cys417   |
| Asp432        | aspartic/glutamic                          | Leu438   |
| Ser433        | serine/glycine/asparagine                  | Gly439   |
| Glu436        | glutamic                                   | Glu442   |
| Pro462        | proline                                    | Pro468   |
| Thr463        | threonine                                  | Thr469   |
| Ser464        | serine                                     | Ser470   |
| Glu466        | glutamic                                   | Glu472   |
| Glu467        | glutamic                                   | Glu473   |

# <sup>1</sup>H NMR AND <sup>13</sup>C NMR SPECTRA OF FINAL TRIAZOLE COMPOUNDS

## Compound 12a

ARP-IV-9

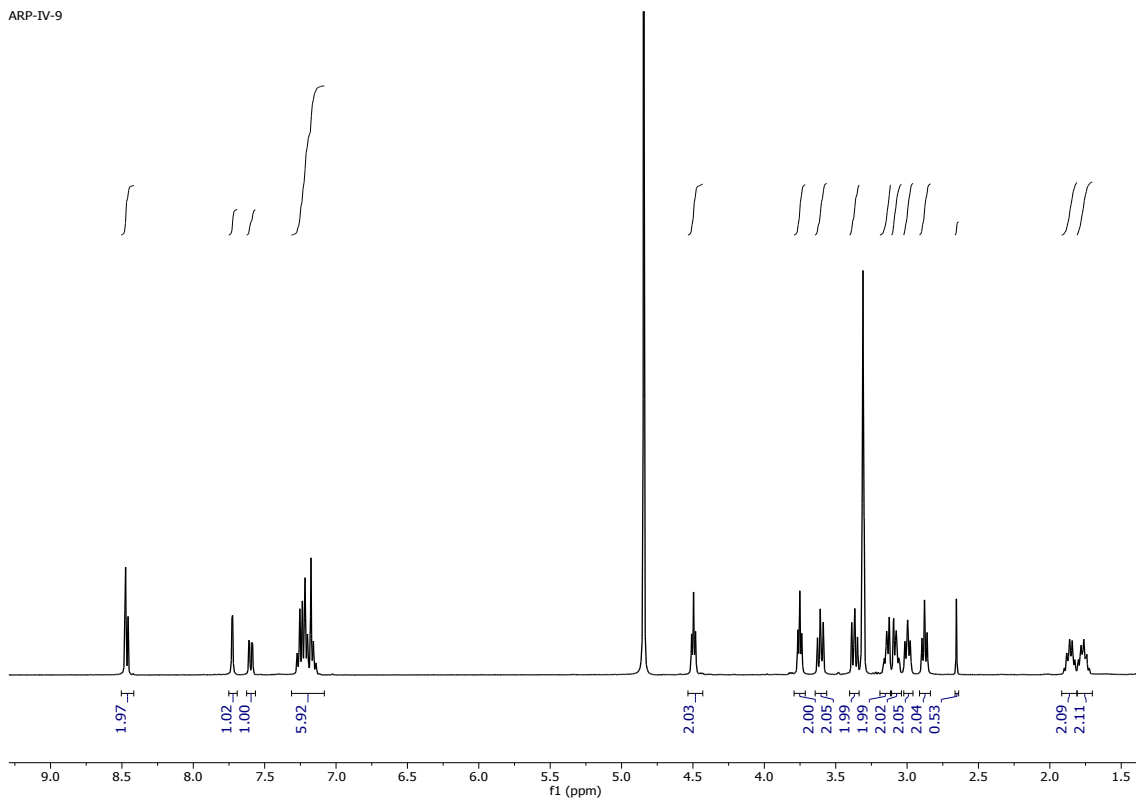

ARP-III-52.23.fid

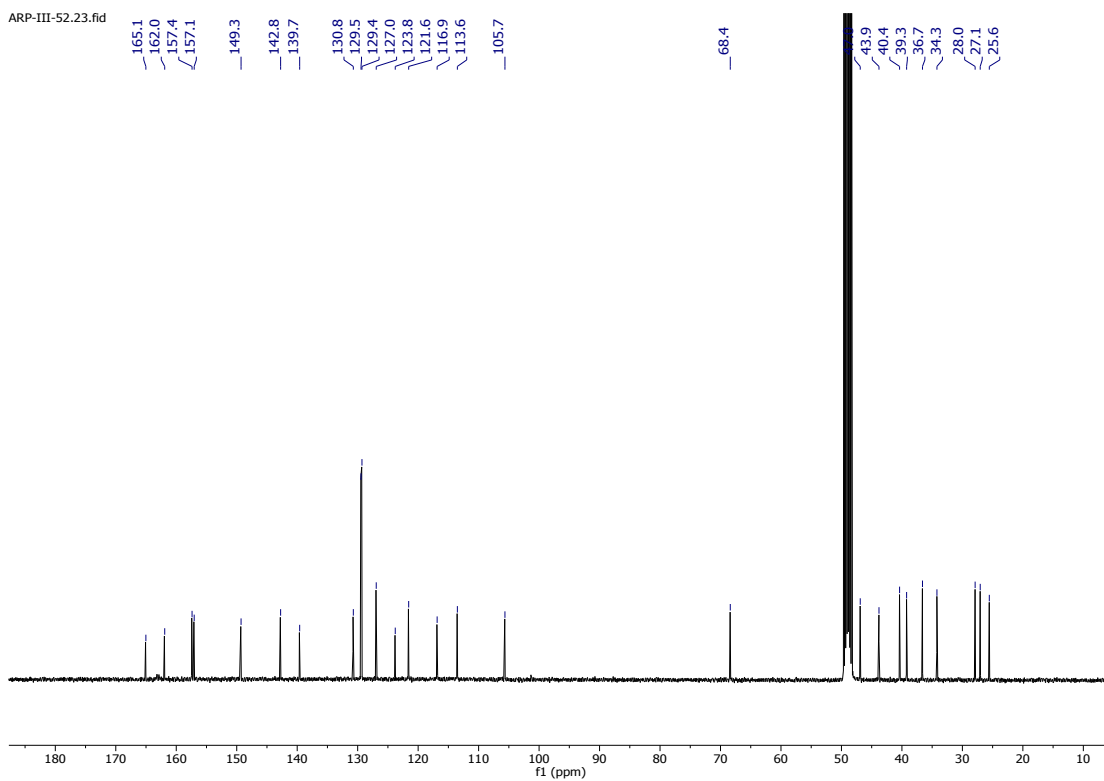

# Compound 12b

ARP-IV-27

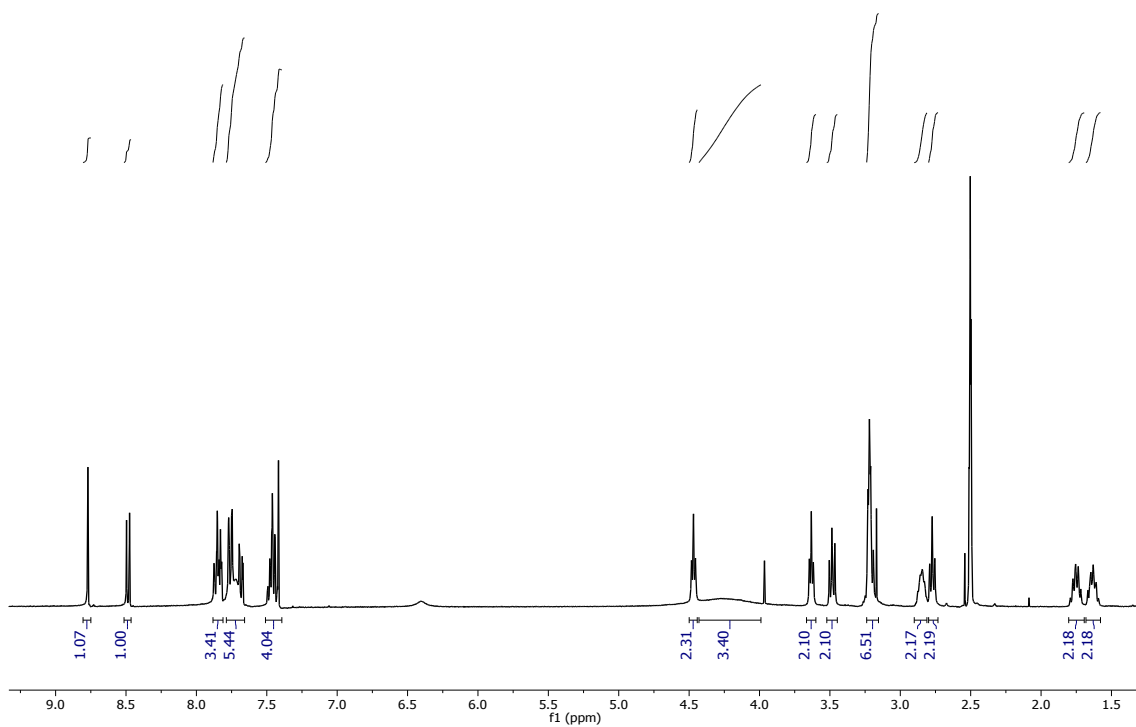

ARP-IV-27.11.fid  
ARP-IV-27

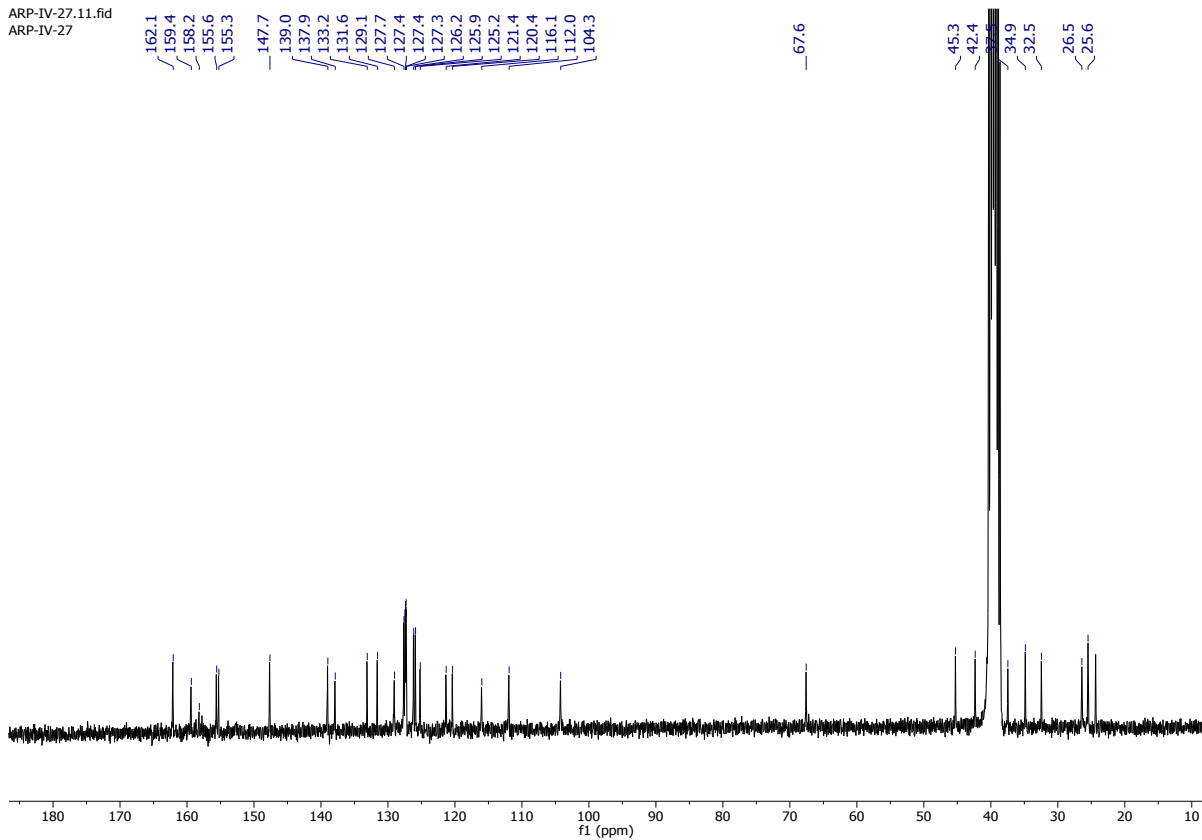

# Compound 12c

ARP-V-47ColF19-23

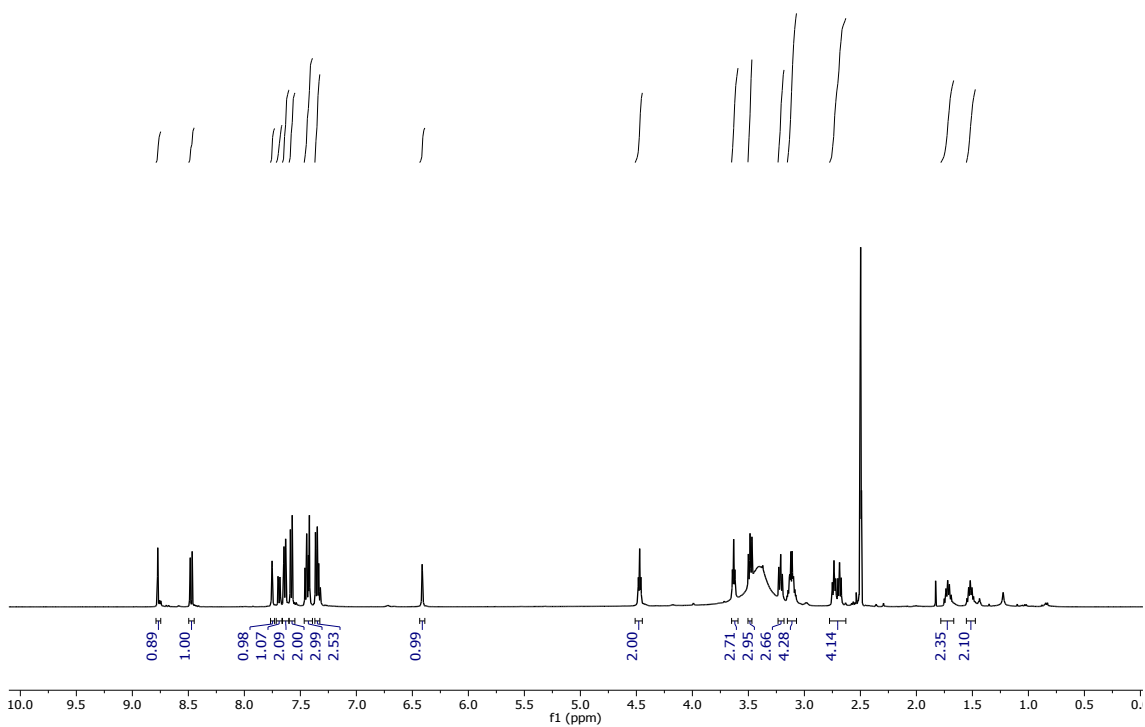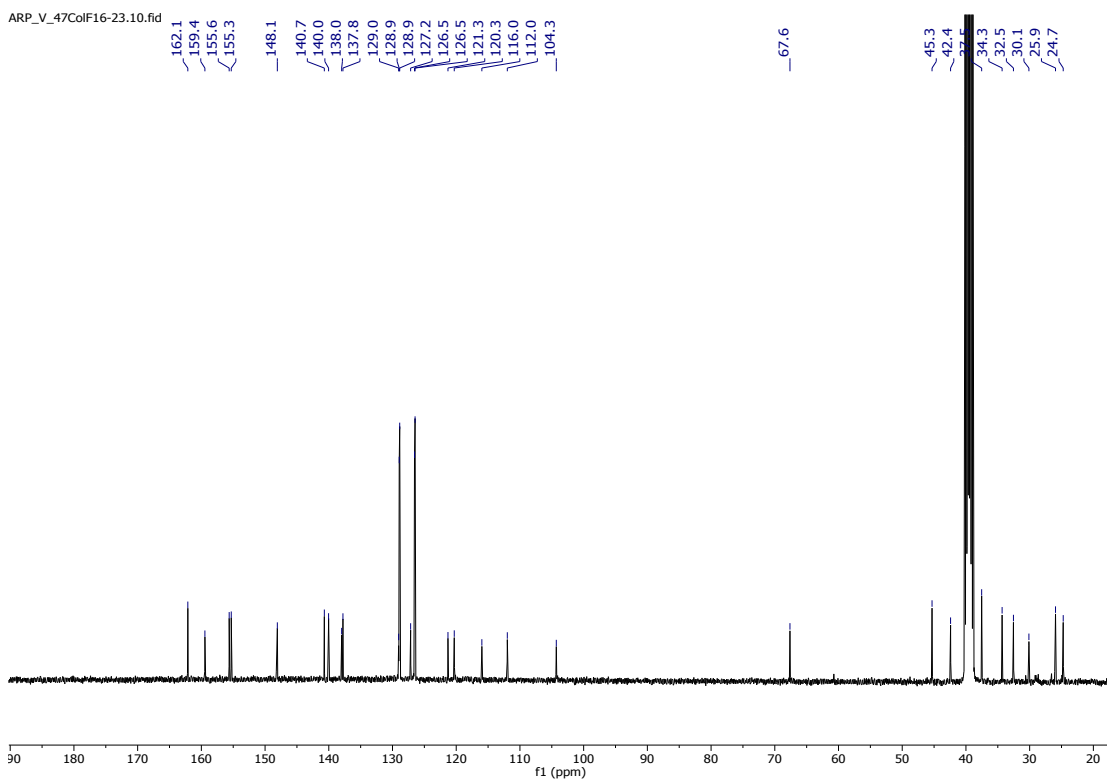

# Compound 12d

ARP-IV-42COLF18-25

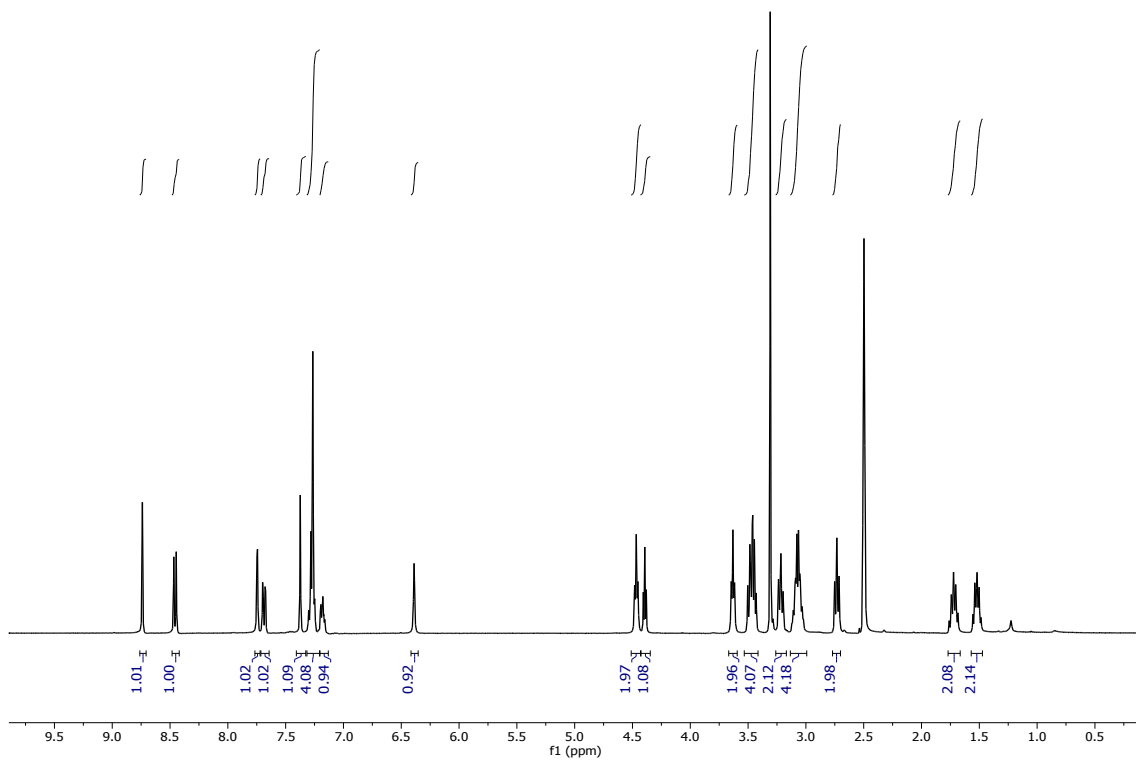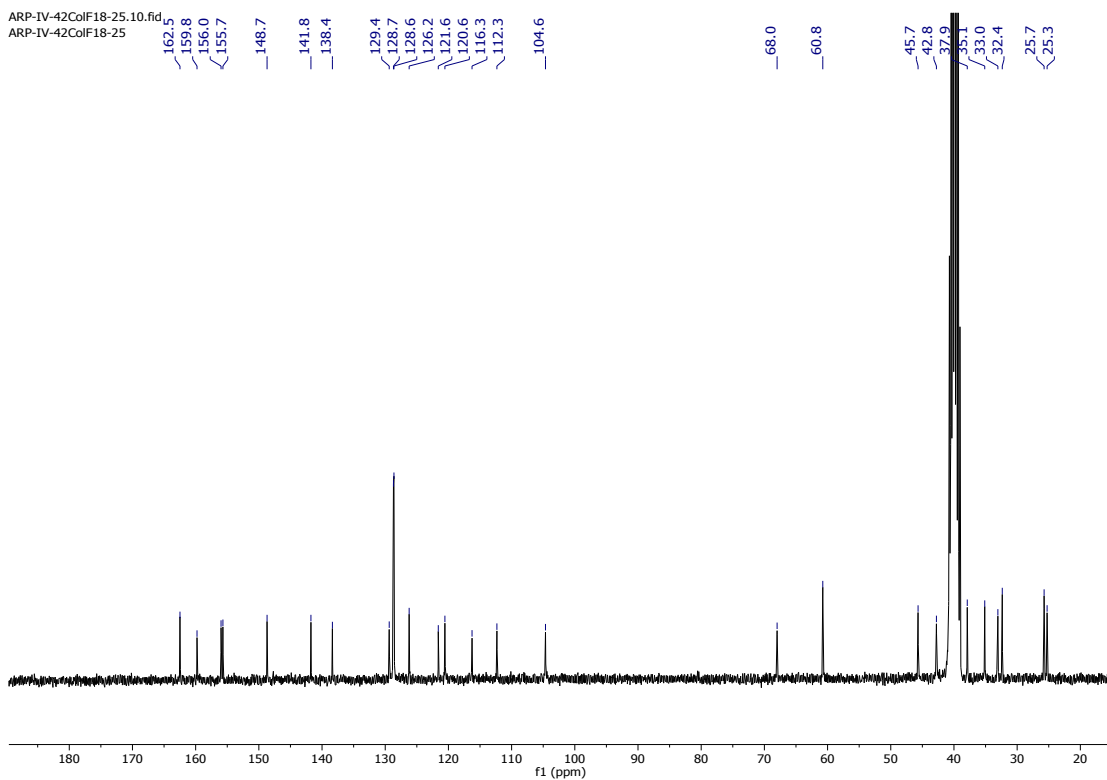



# Compound 12e

ARP-IV-36ColF13-14

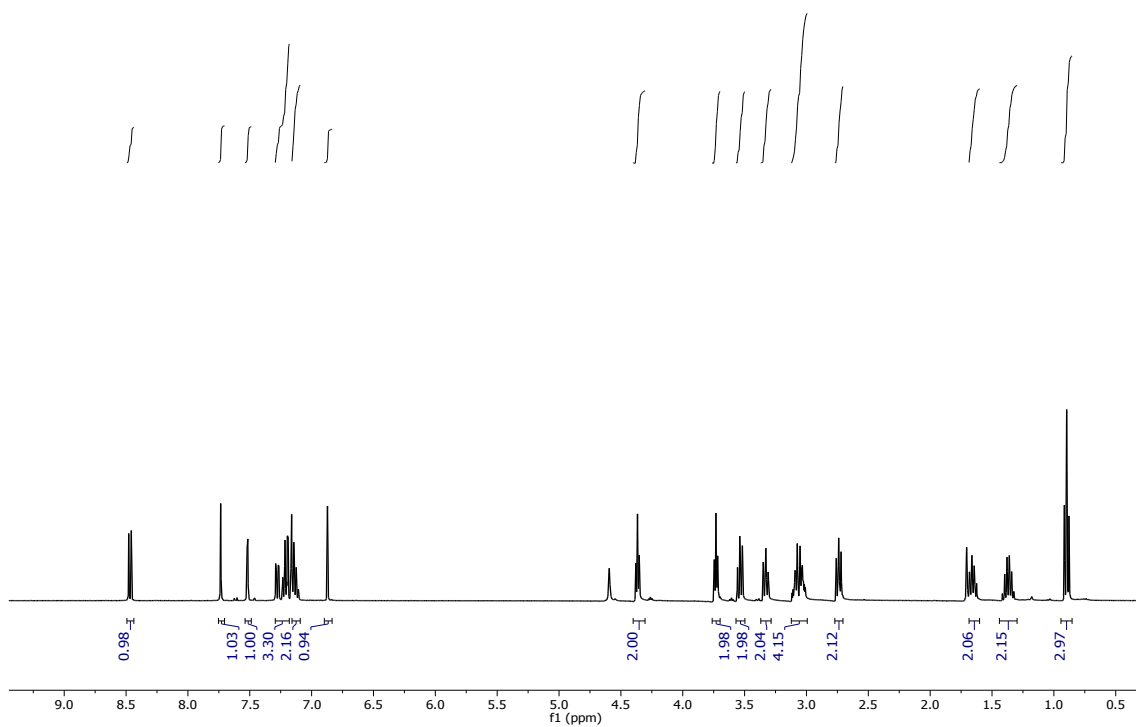

ARP-IV-36colF13-14.10.fid  
ARP-IV-36colF13-14

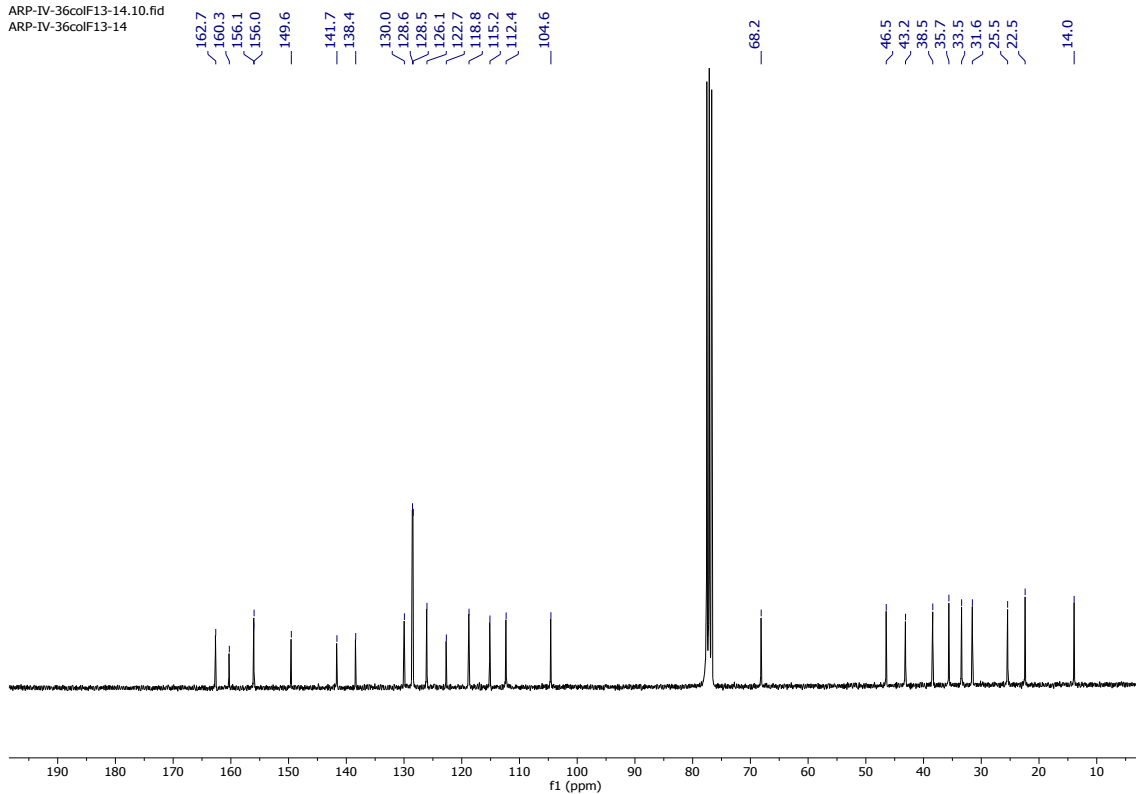

# Compound 12f

ARP-VII-33ColF3-13

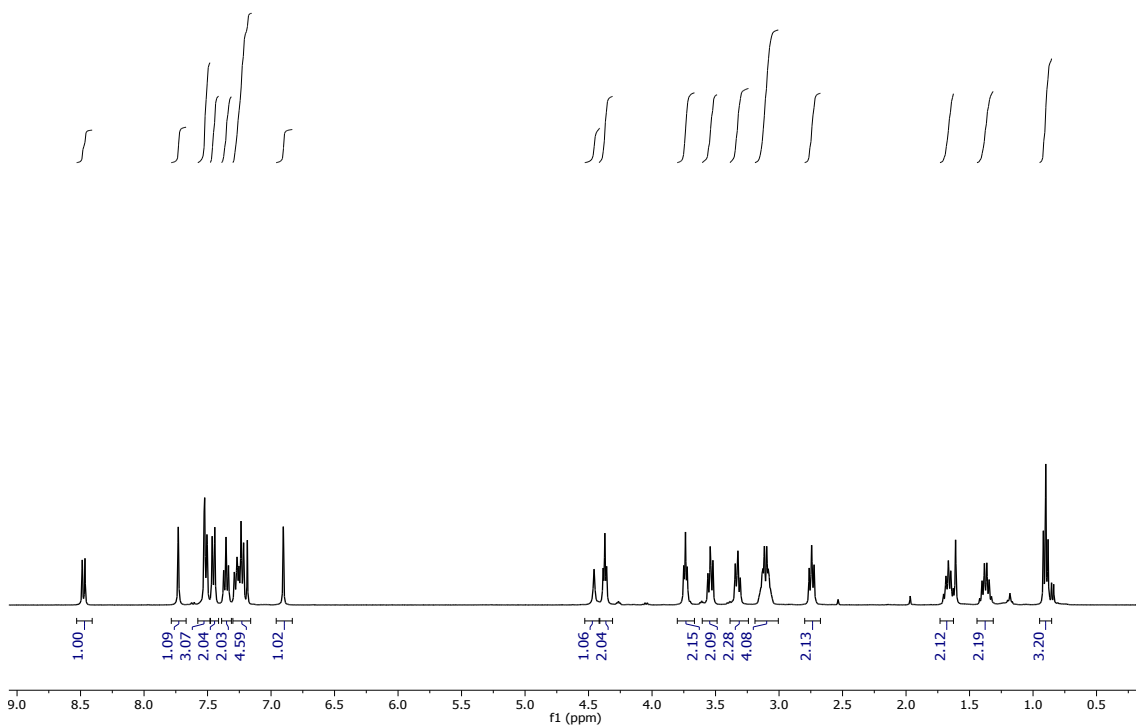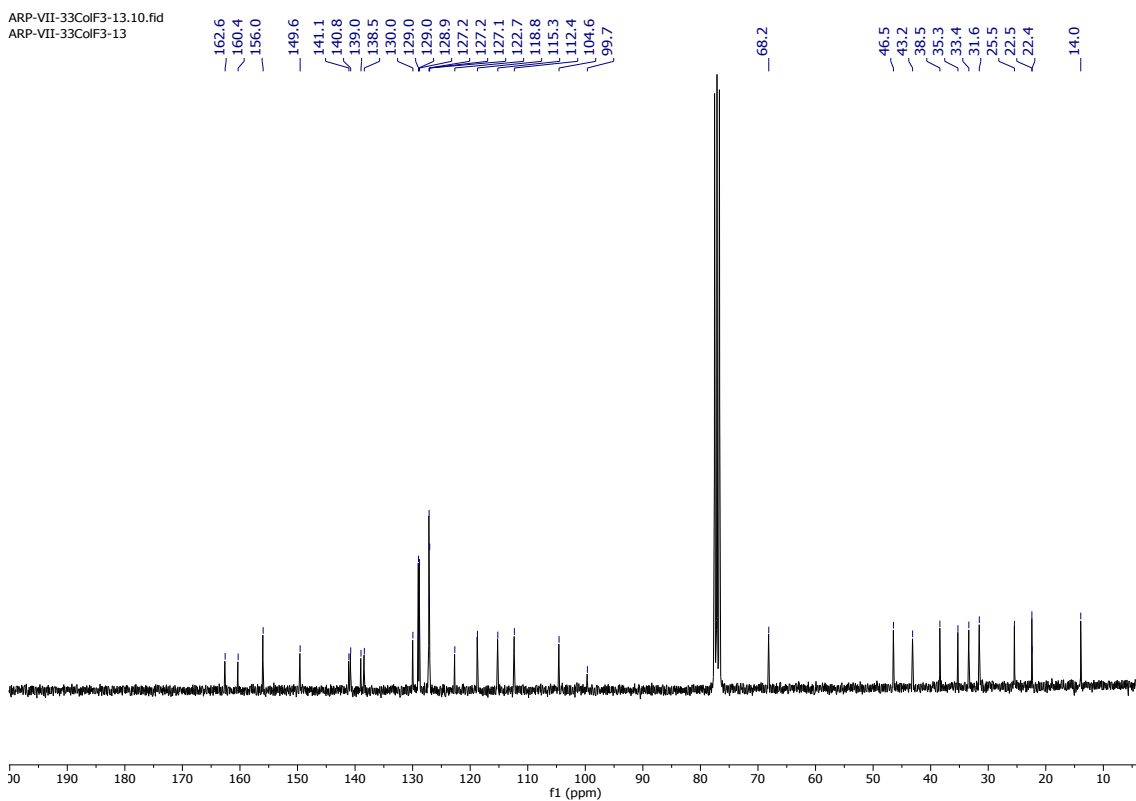

# Compound 12g

ARP-VIII-7SOLIDO

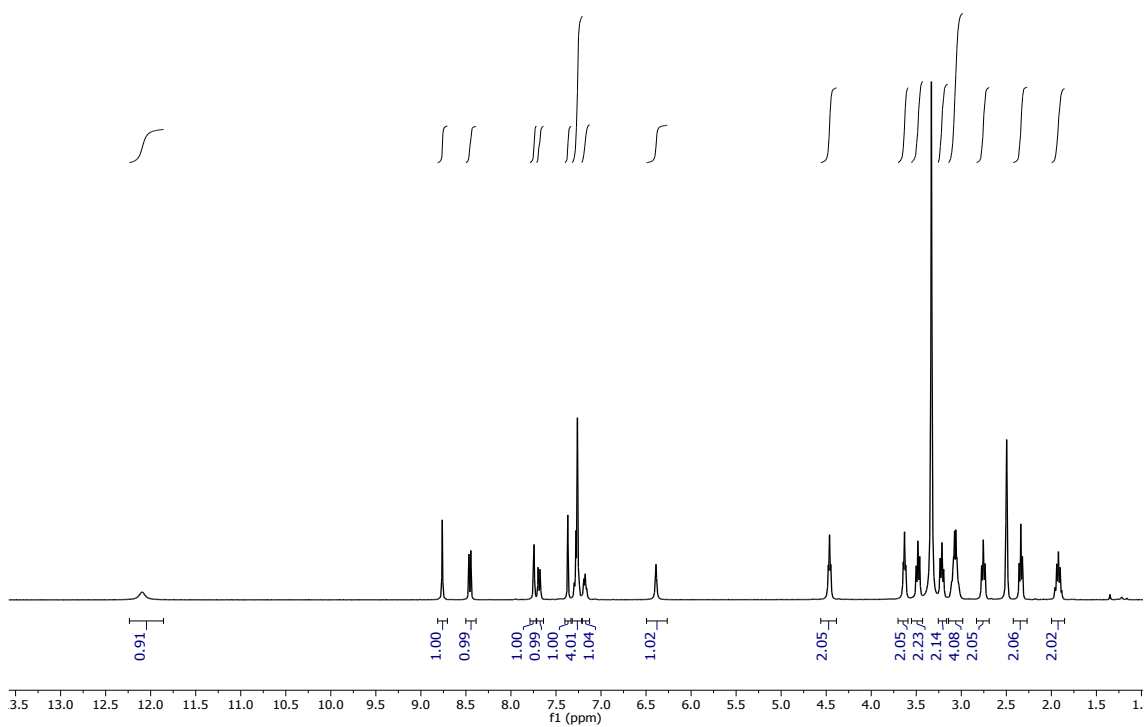

ARP-VIII-7SOLIDO.10.fid  
ARP-VIII-7SOLIDO

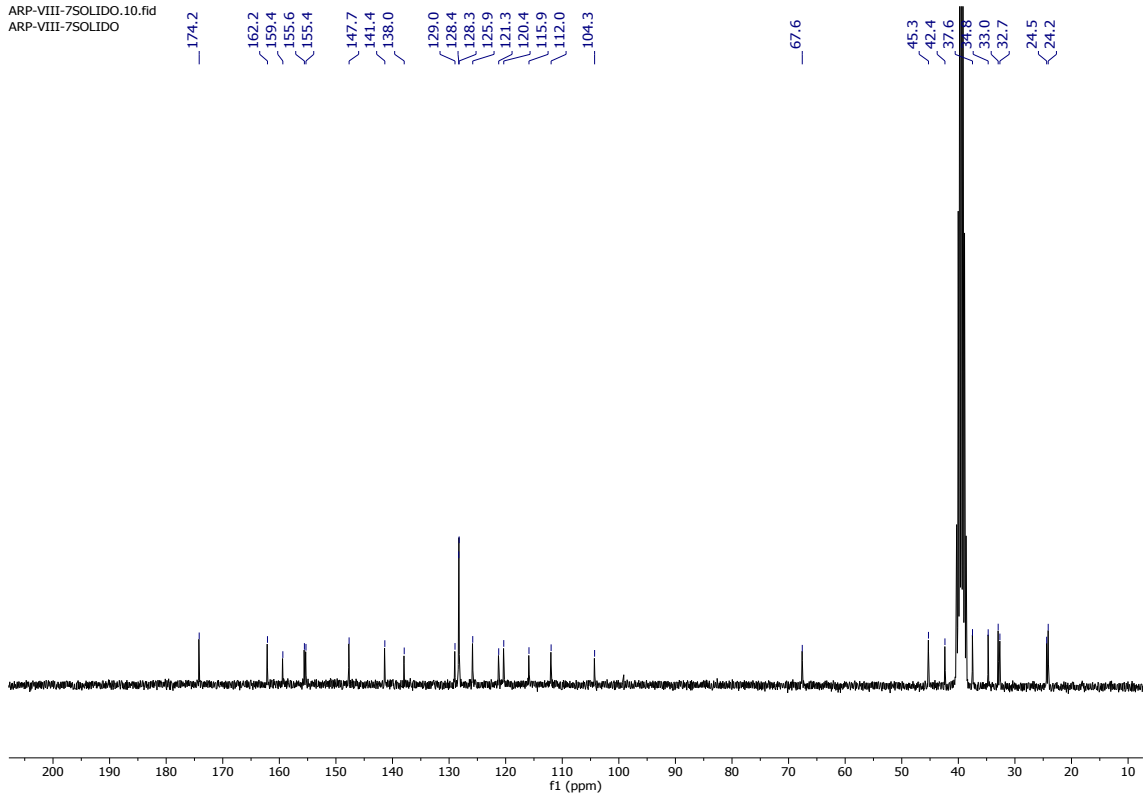

# Compound 12h

ARP-VII-8COLF4

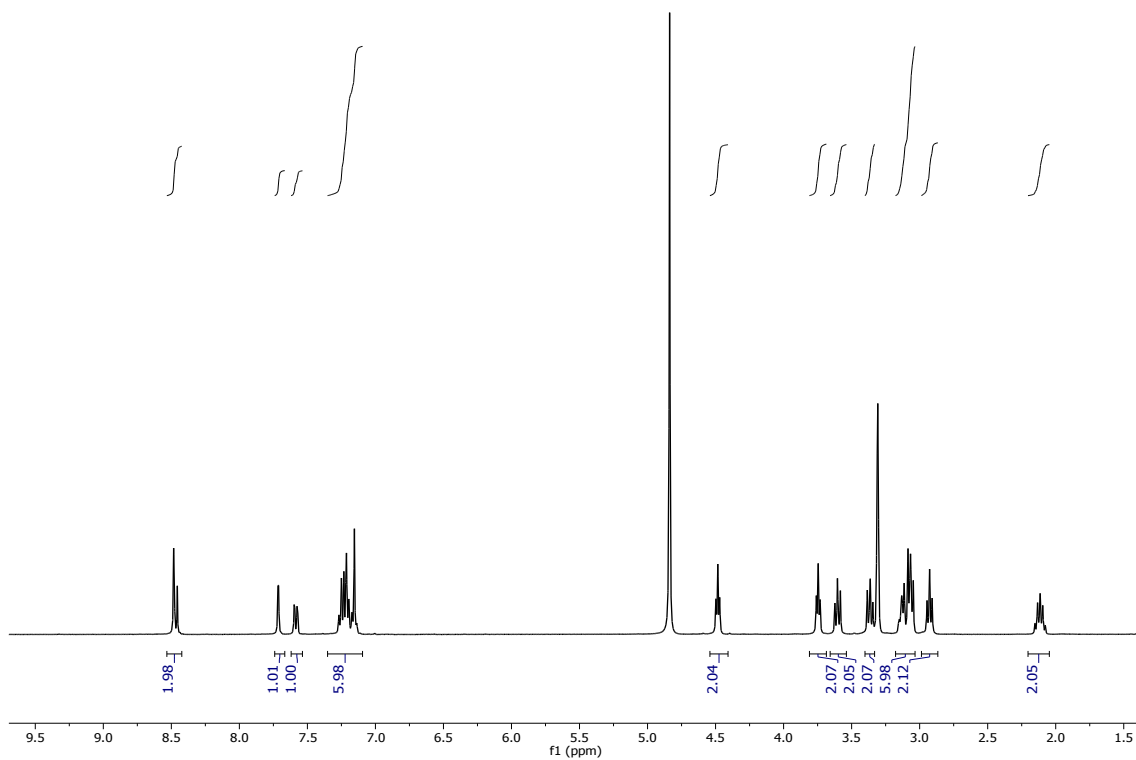

ARP-VII-8ColF4.20.fid

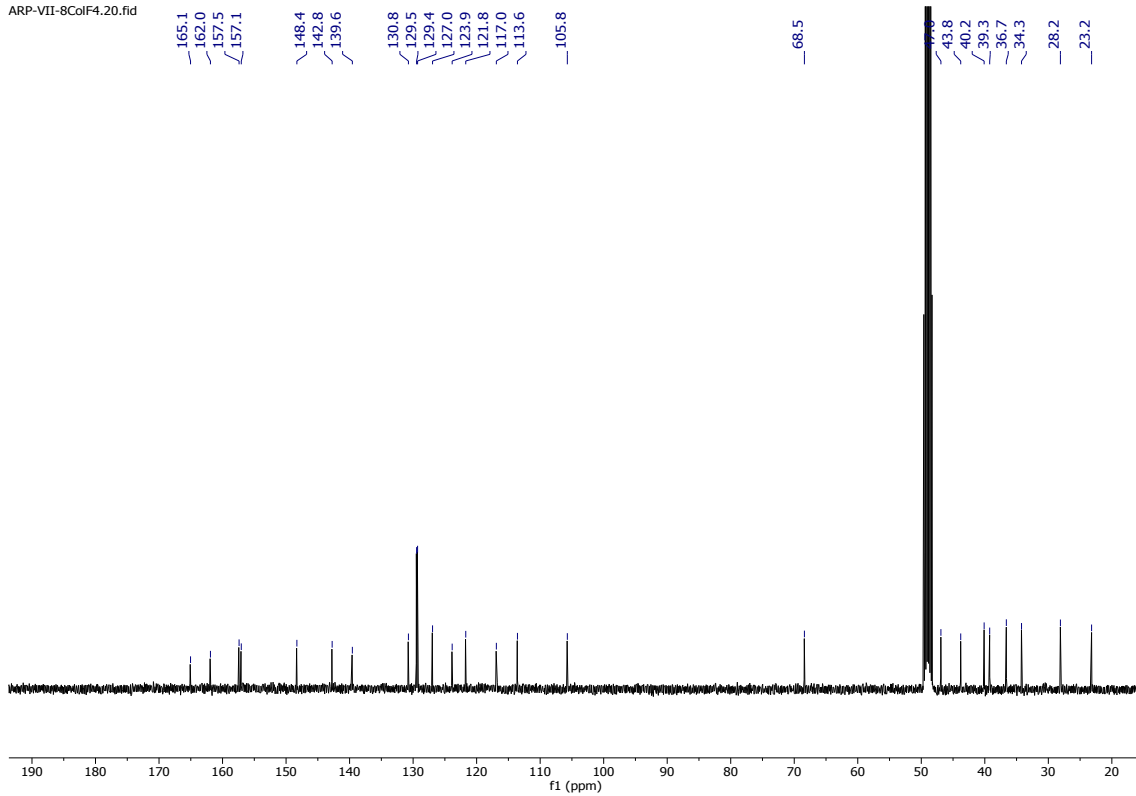

# Compound 12i

ARP-VII-31CoIF10-15

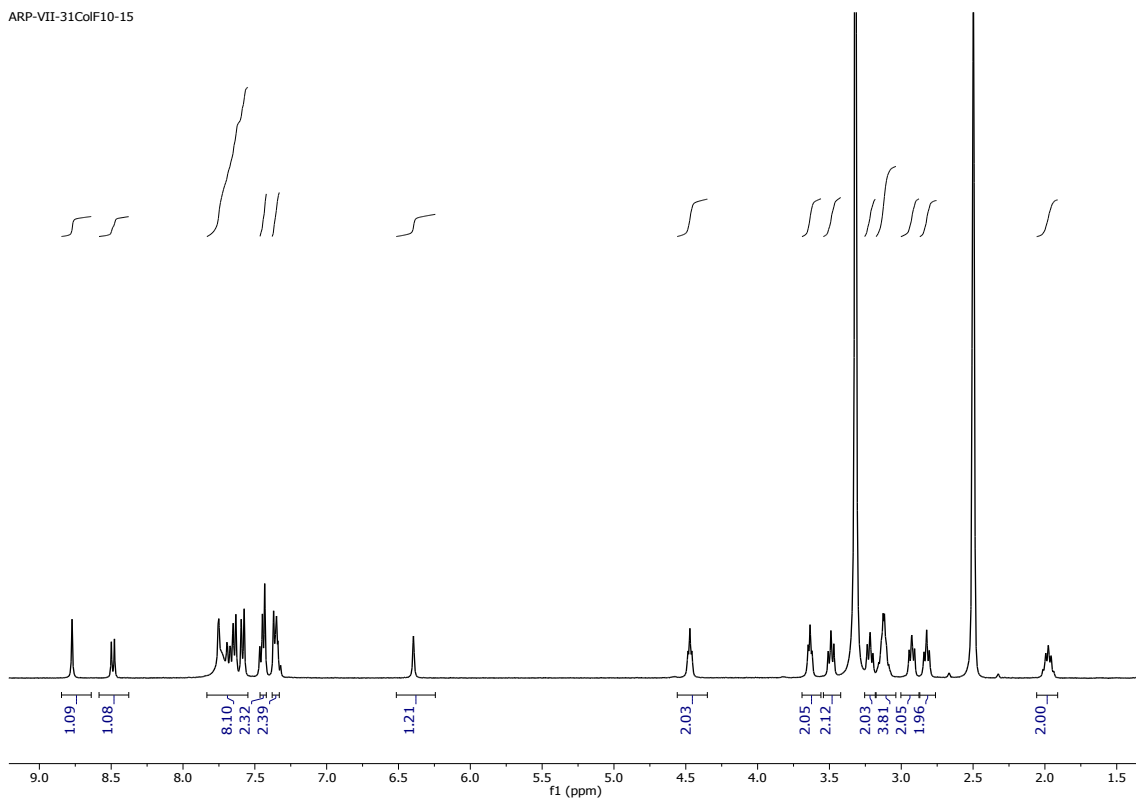

ARP-VII-31CoIF10-15.12.fid  
ARP-VII-31CoIF10-15

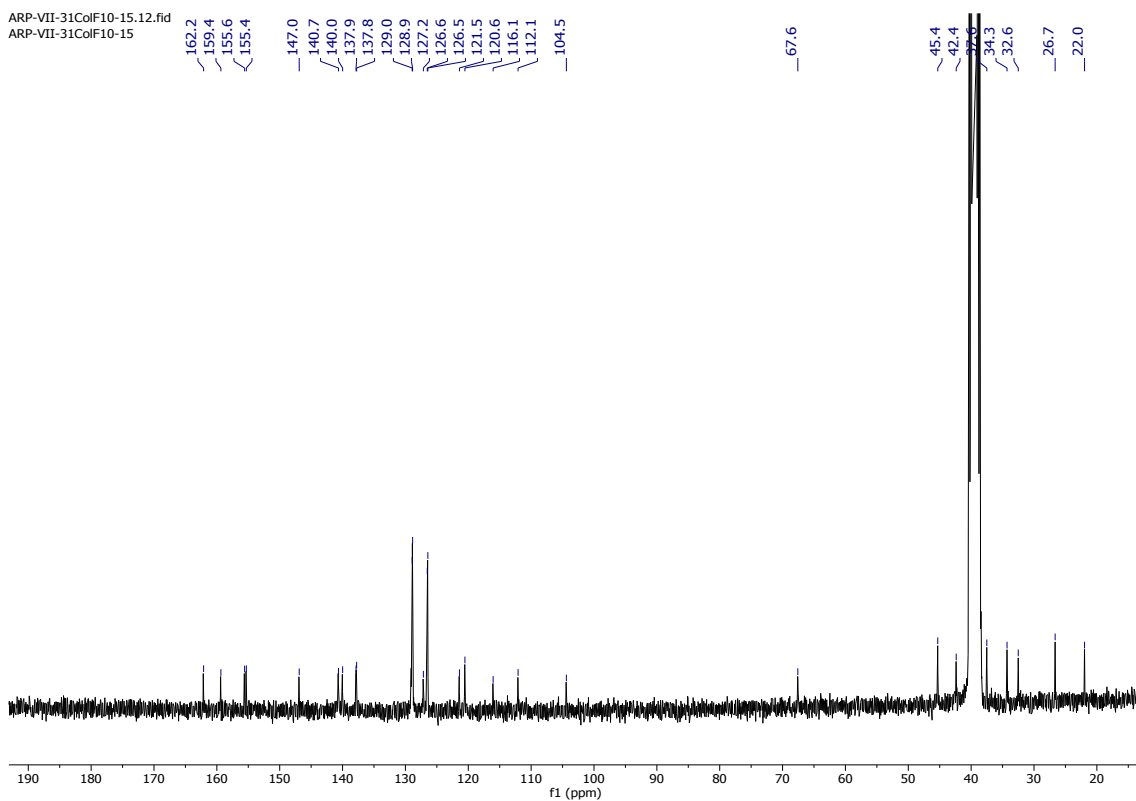

# Compound 12j

ARP-V-2

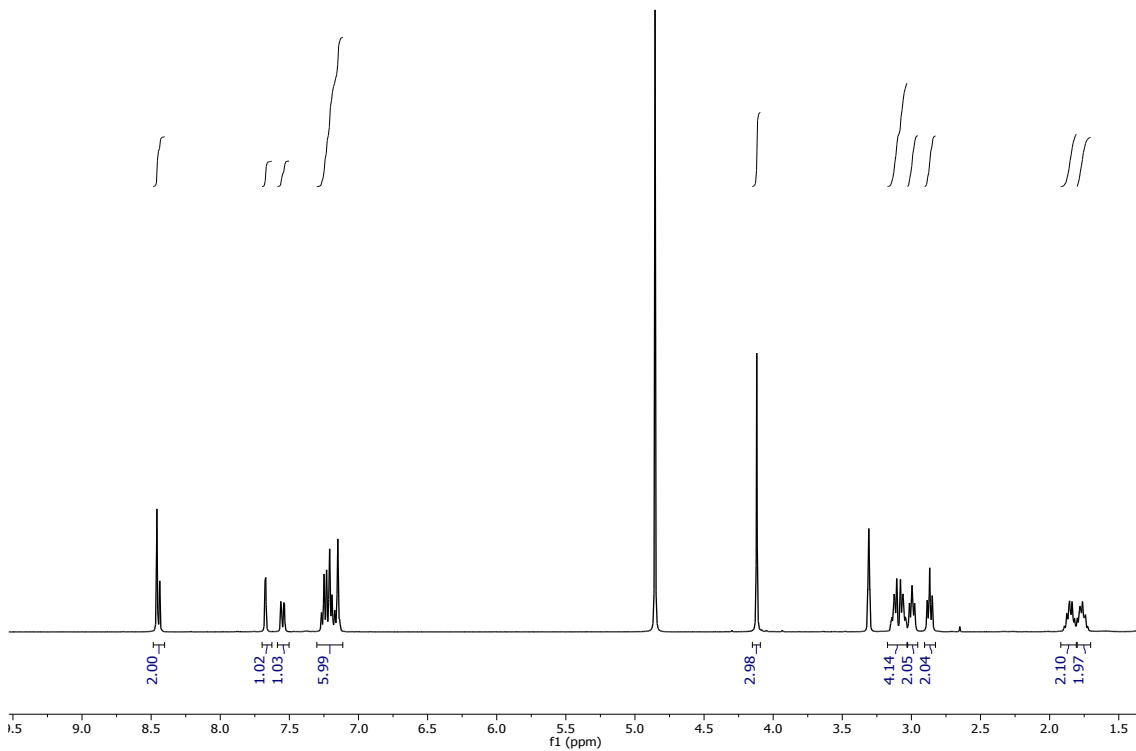

ARP-V-2.11.fid

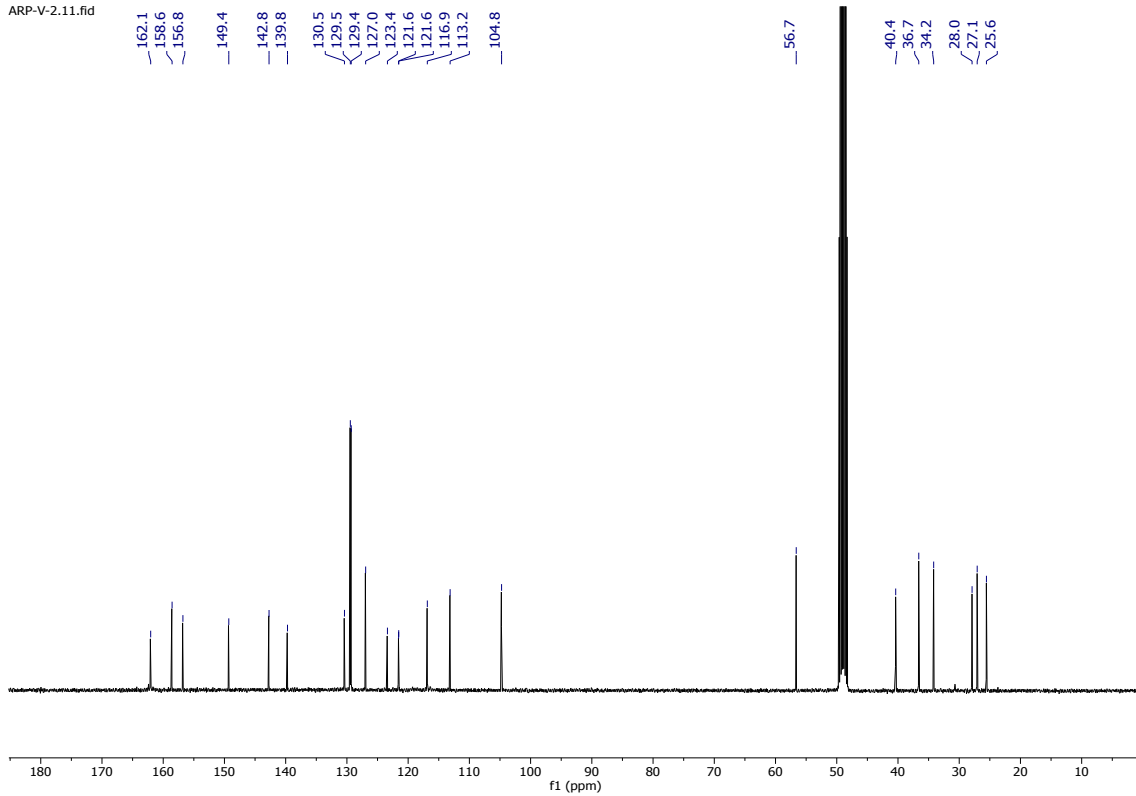

# Compound 12k

ARP-X-20COLF4-10

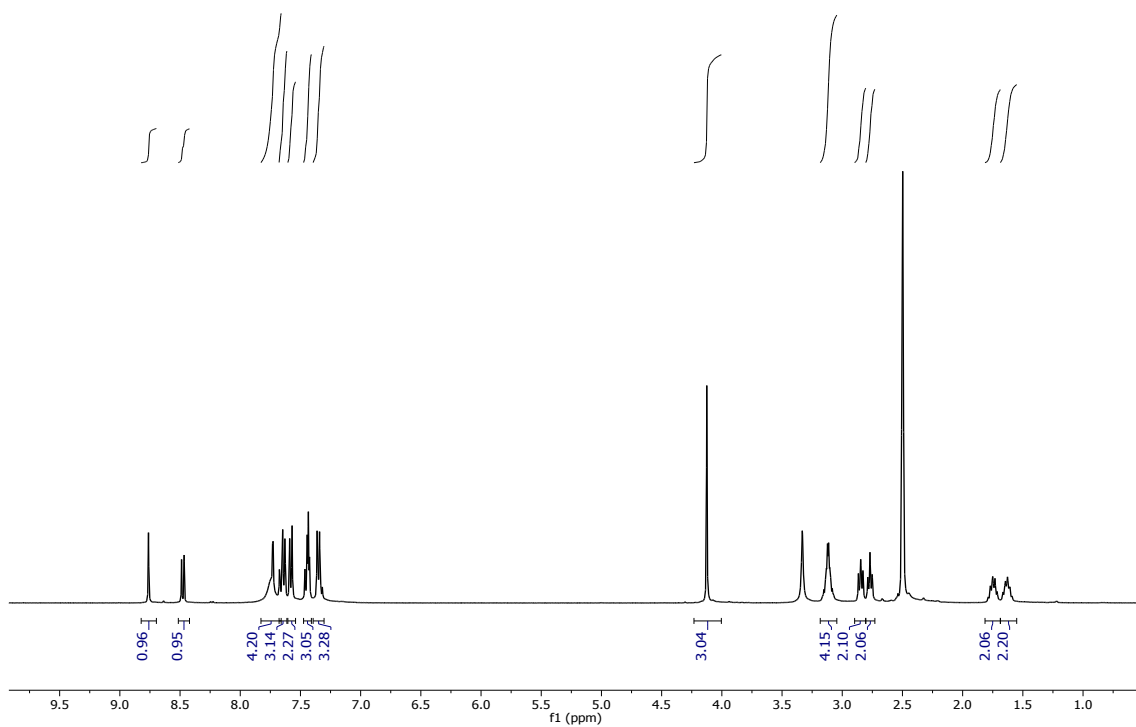

ARP-X-20ColF4-10.20.fid

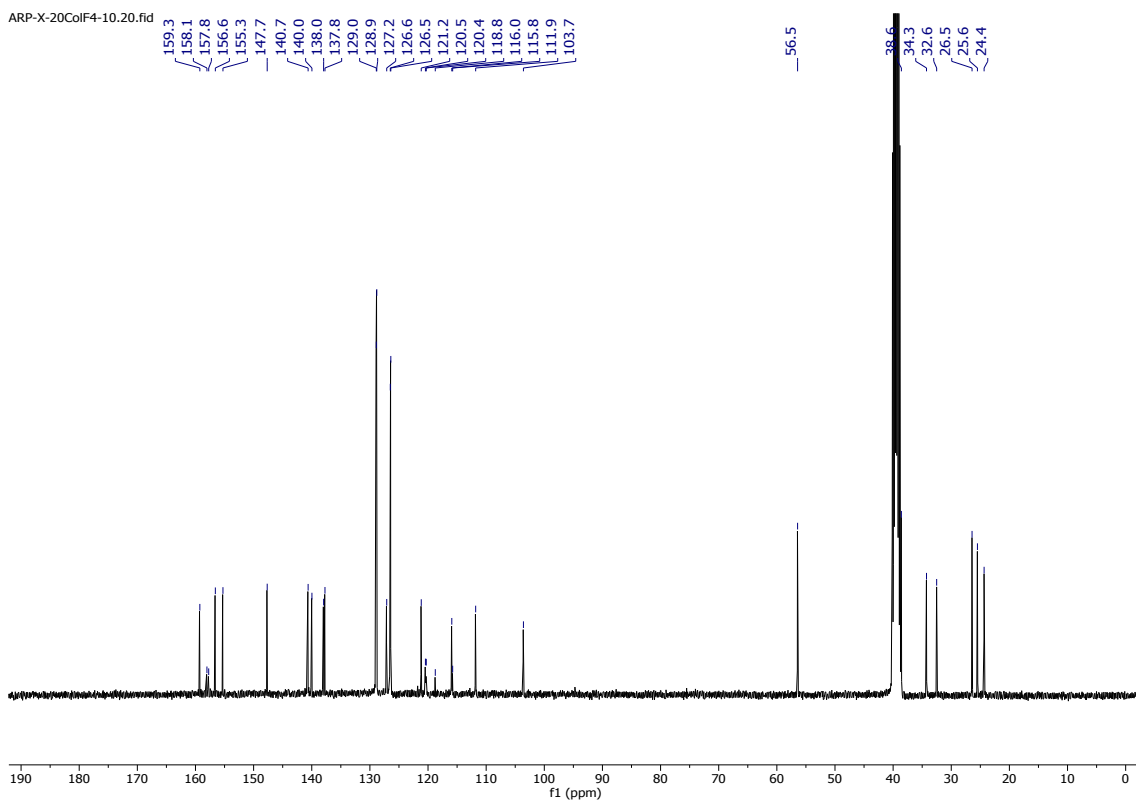

# Compound 12l

ARP-II-17ColF9-10

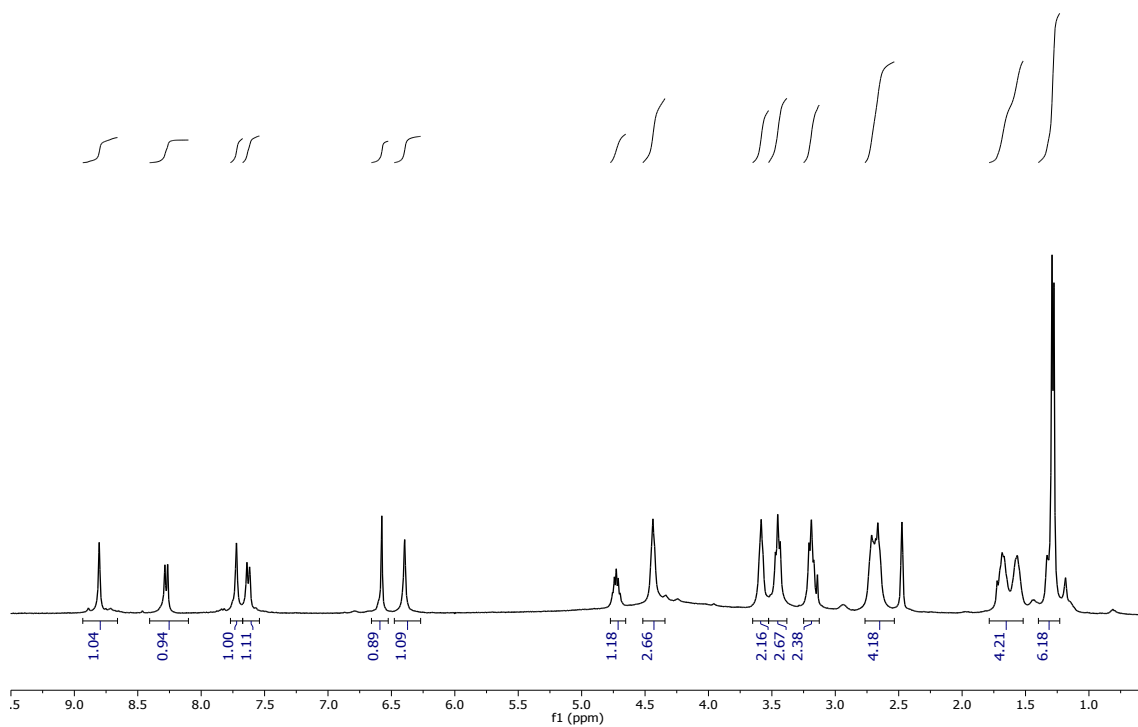

ARP-II-15

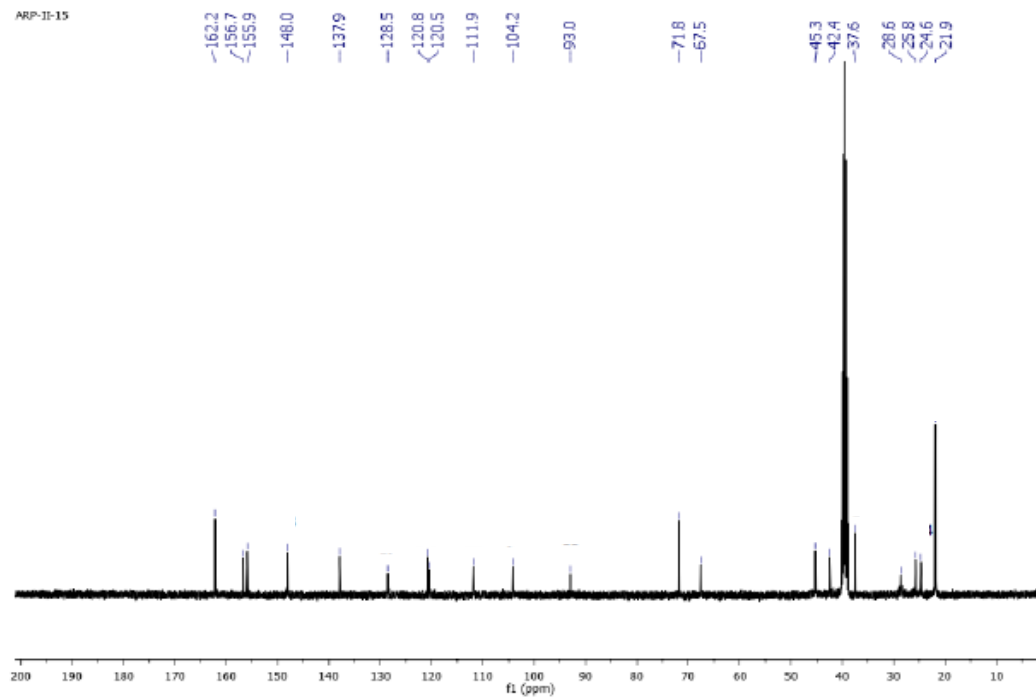



# Compound 12m

ARP-III-44CoIF35-40

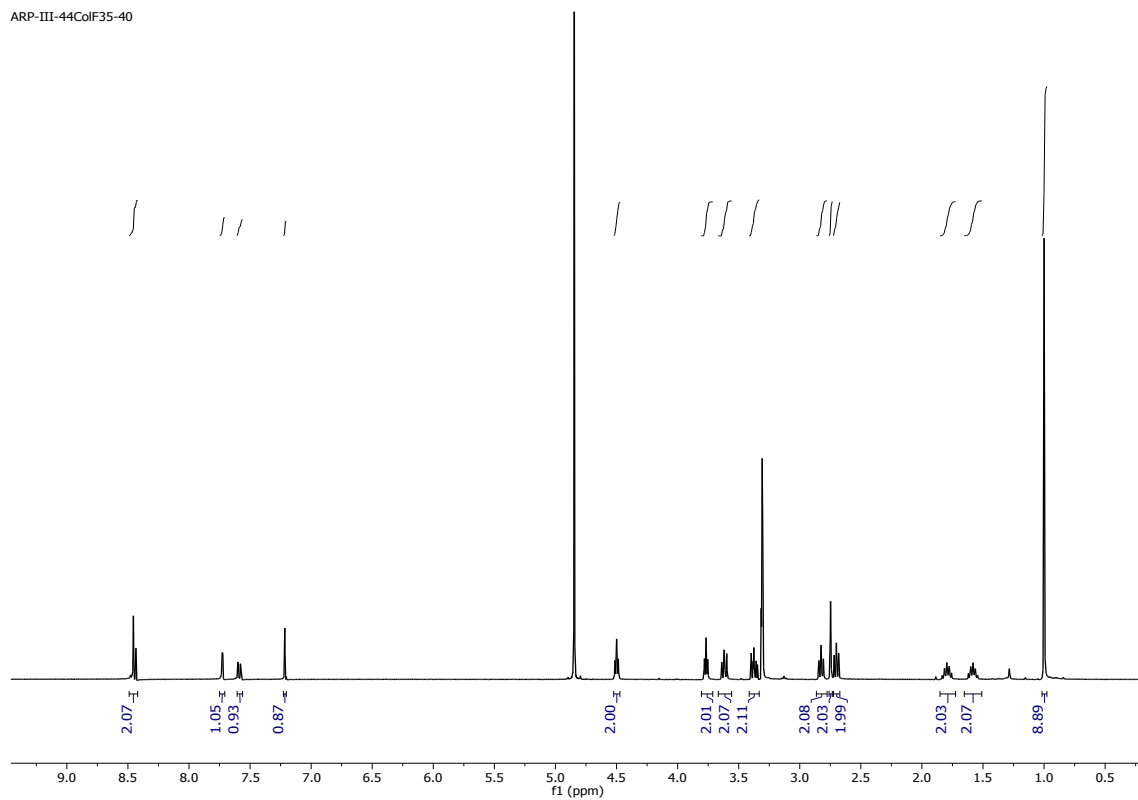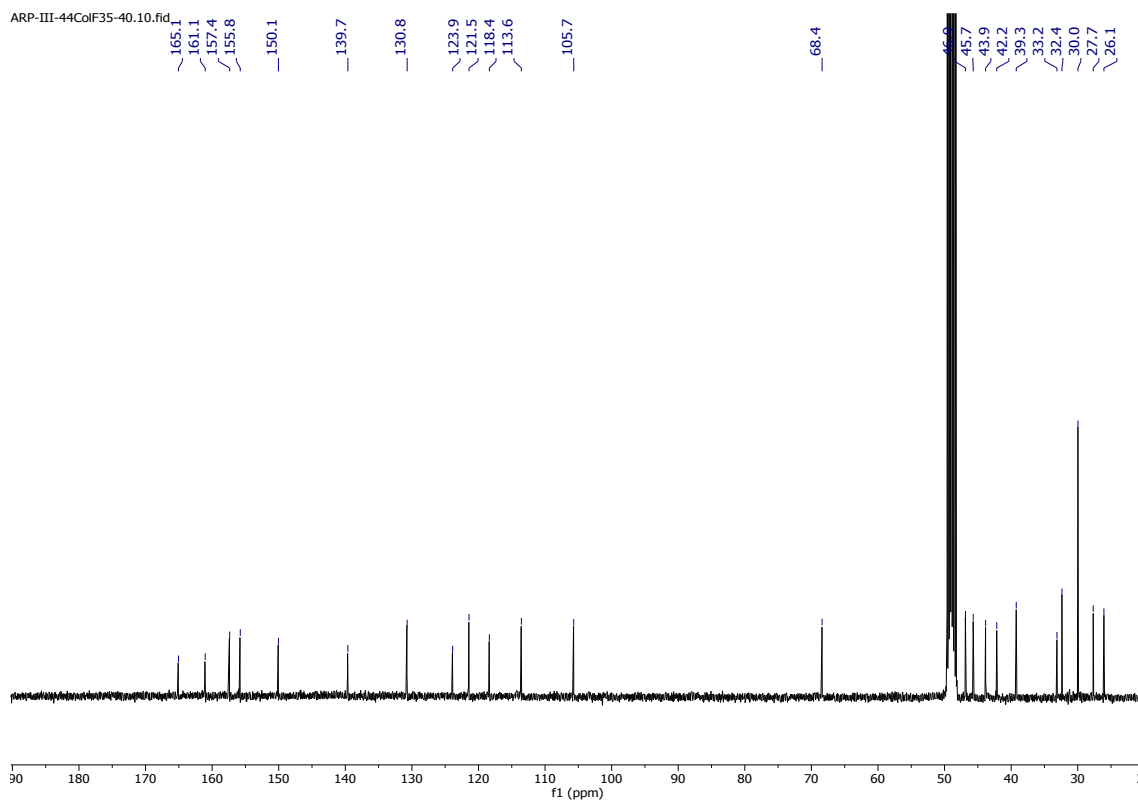

# Compound 12n

ARP-VIII-21COLF14-16

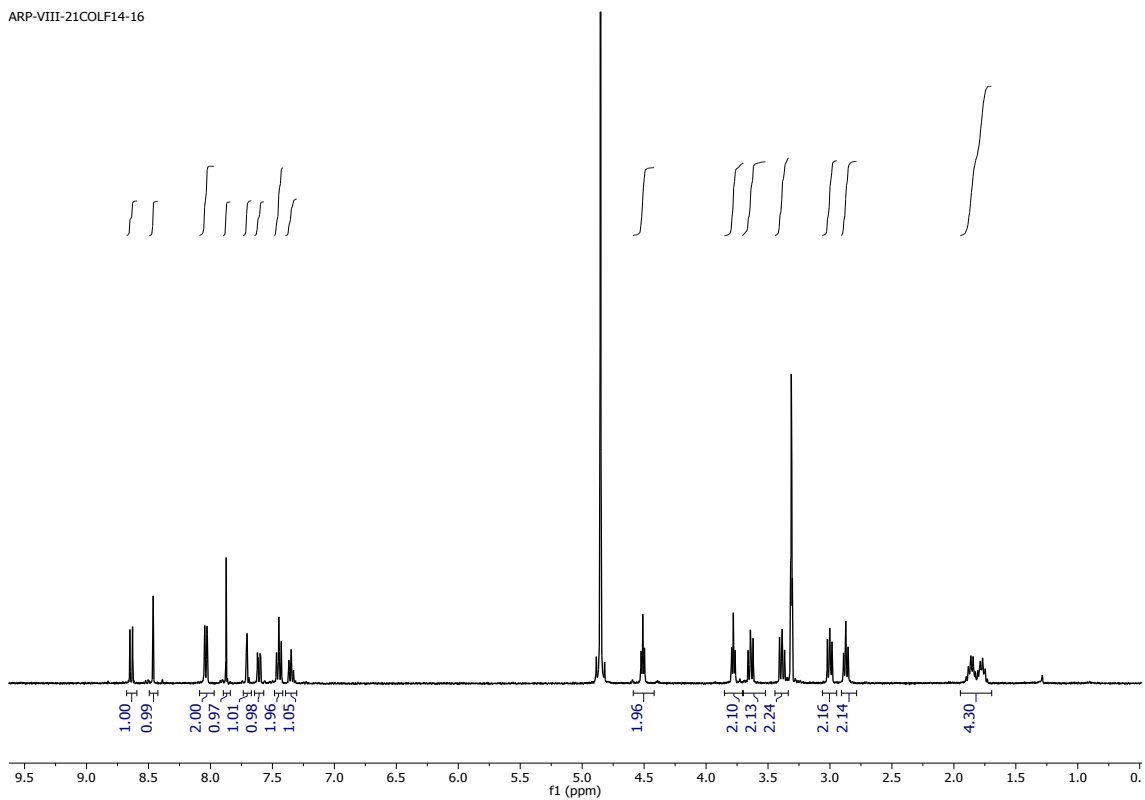

ARP-VIII-21ColF14-16-13c  
STANDARD PROTON PARAMETERS

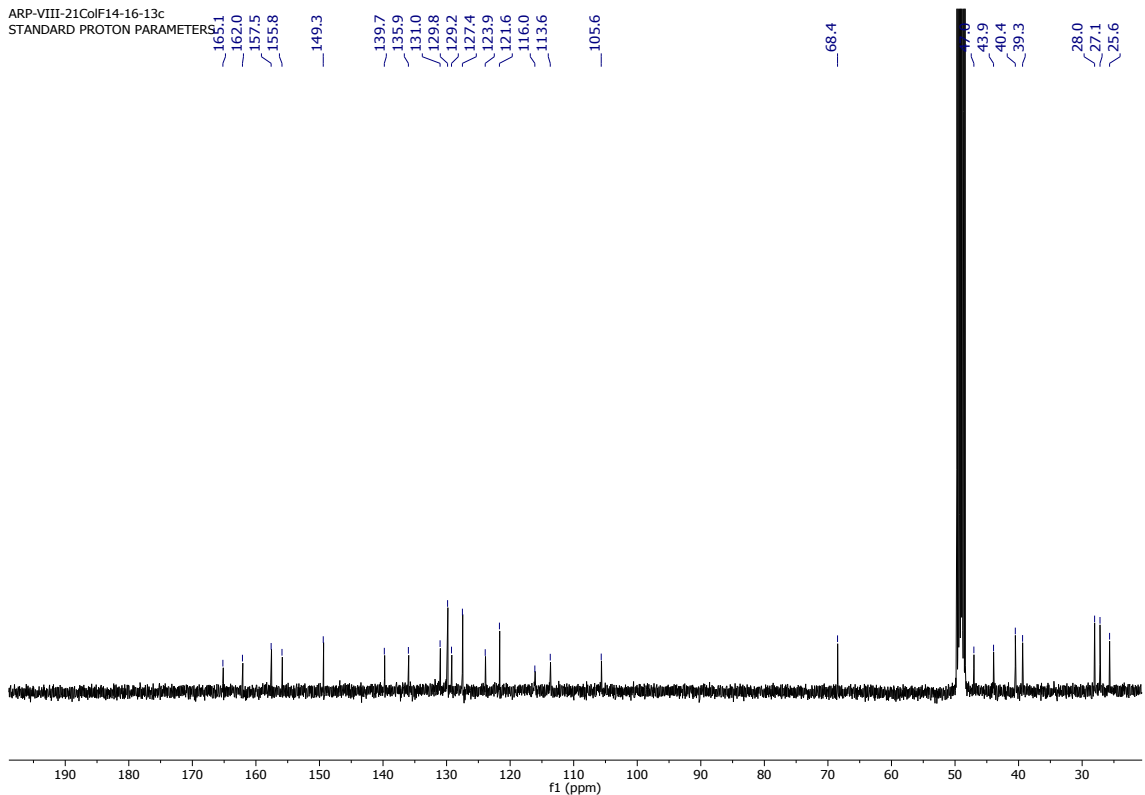

# Compound 12o

ARP-II-27ColF42-43

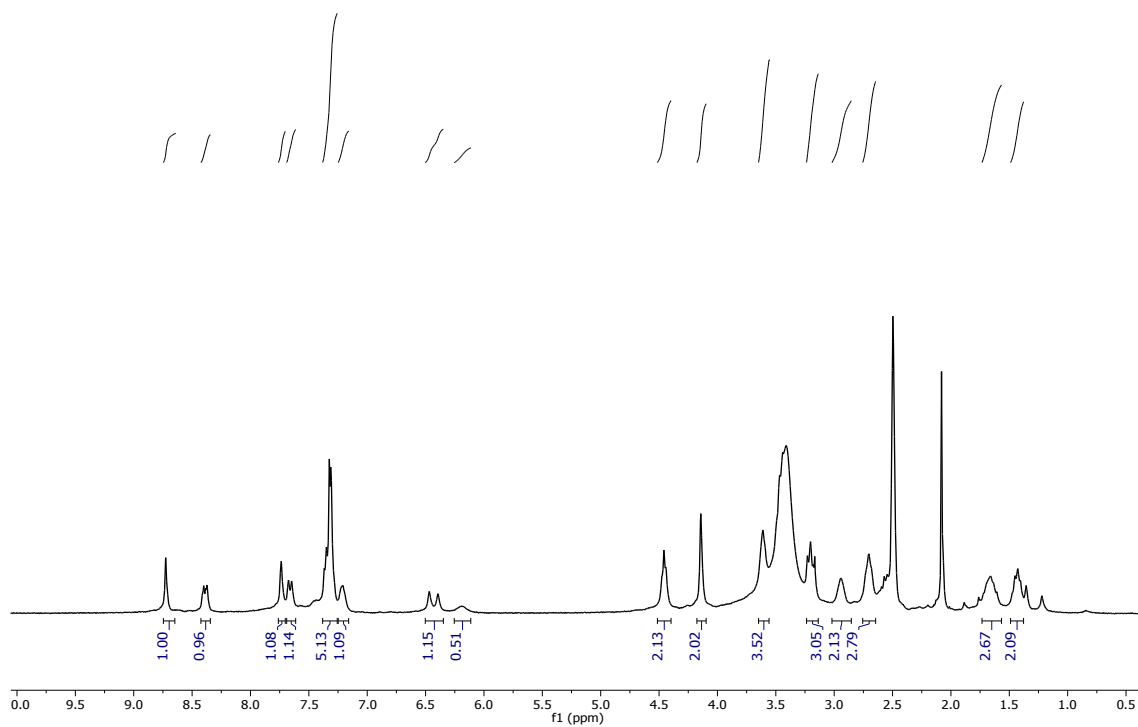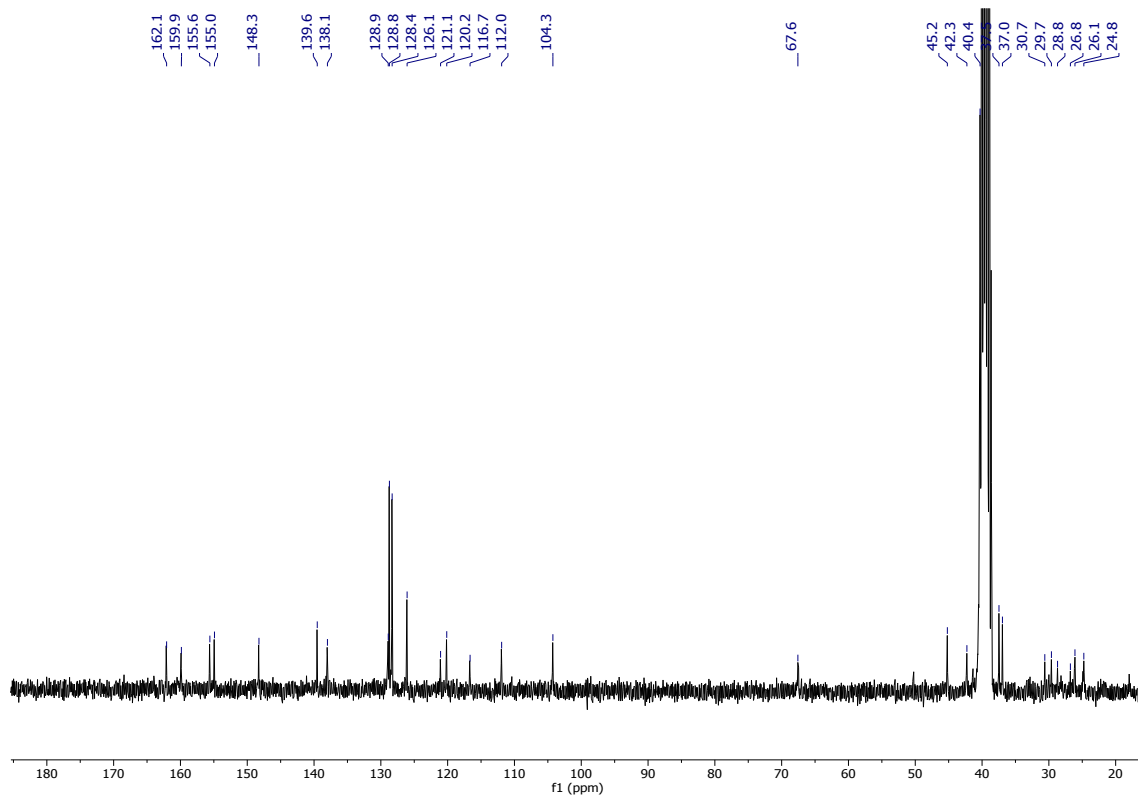

# Compound 12p

ARP-VI-62COLF33

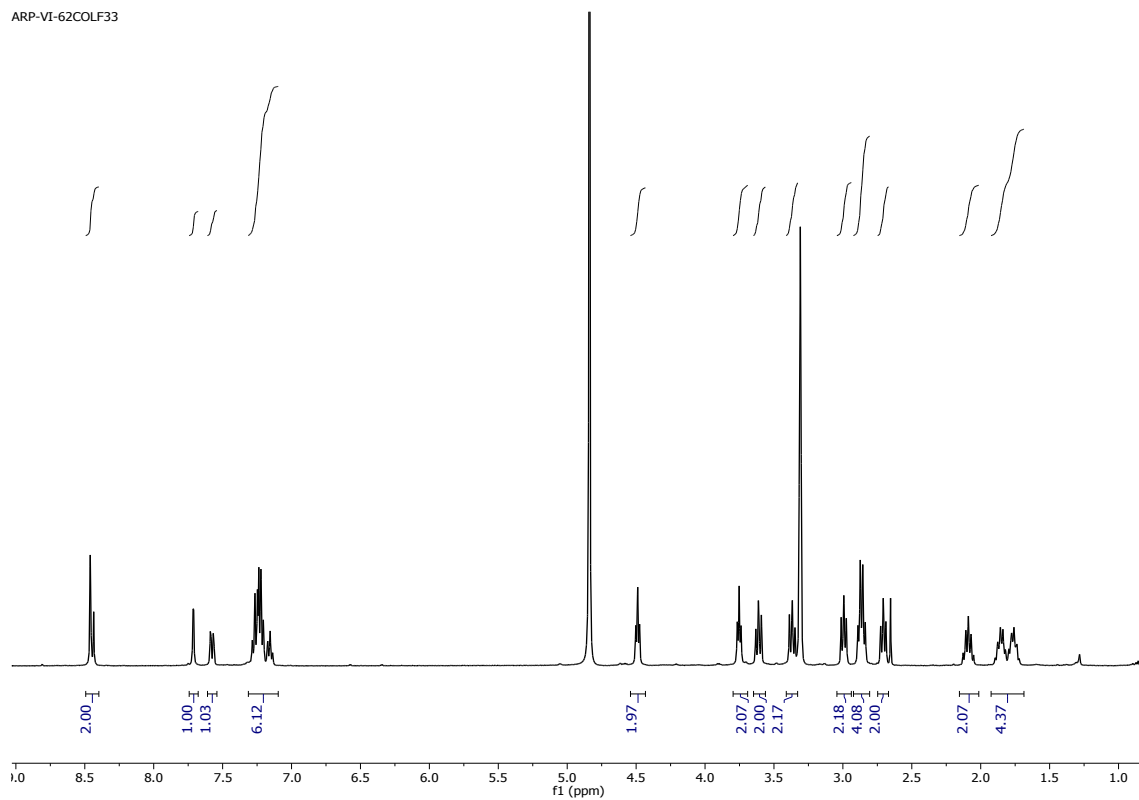

ARP-VI-62ColF33.20.fid

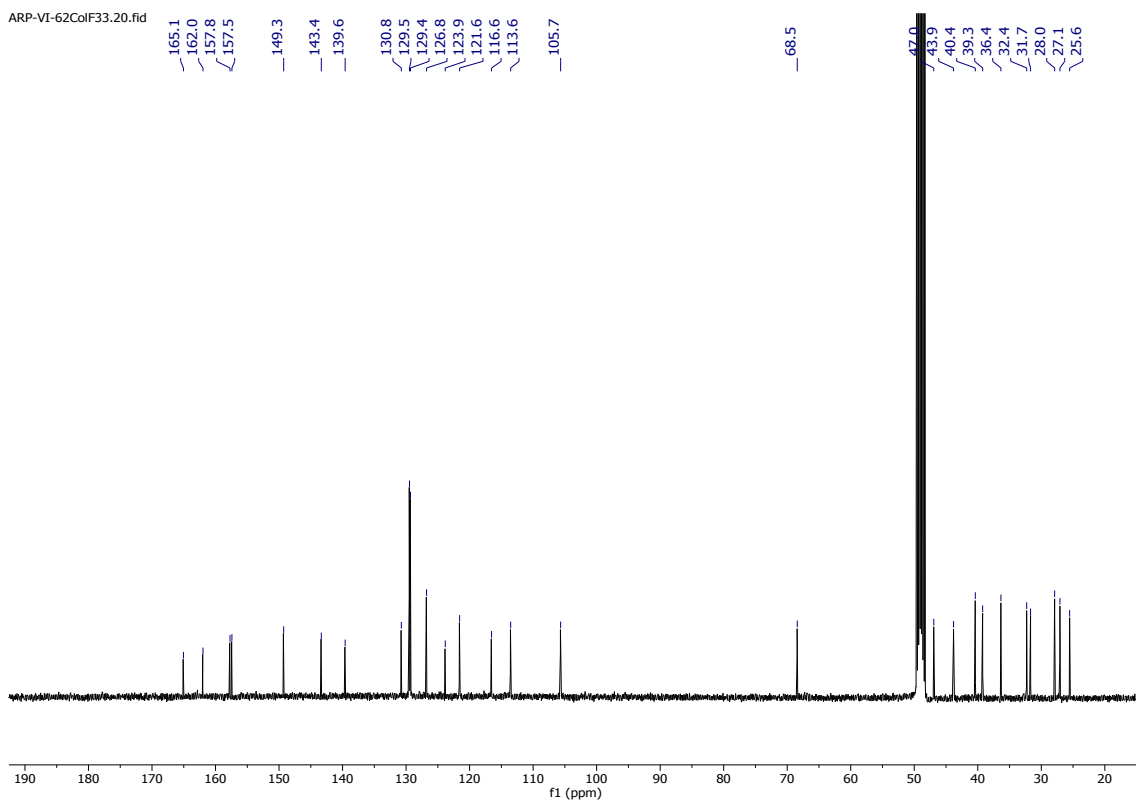

# Compound 12q

ARP-VIII-49CoIF27-32

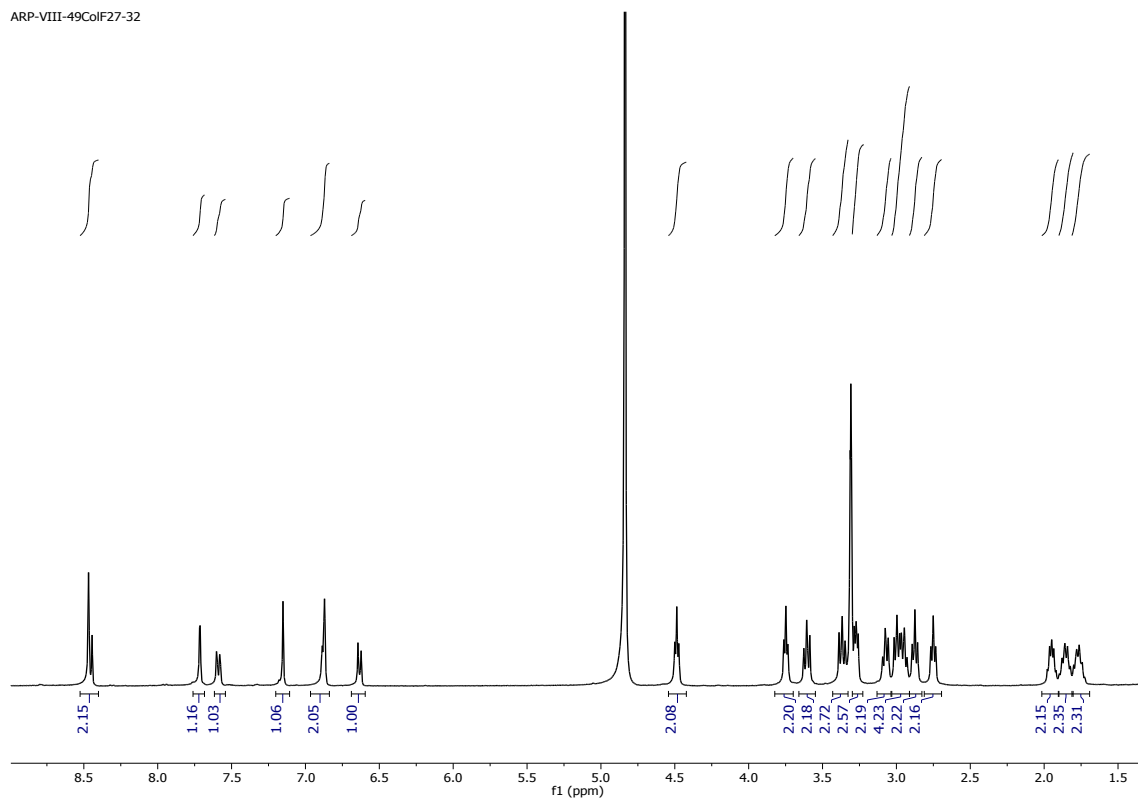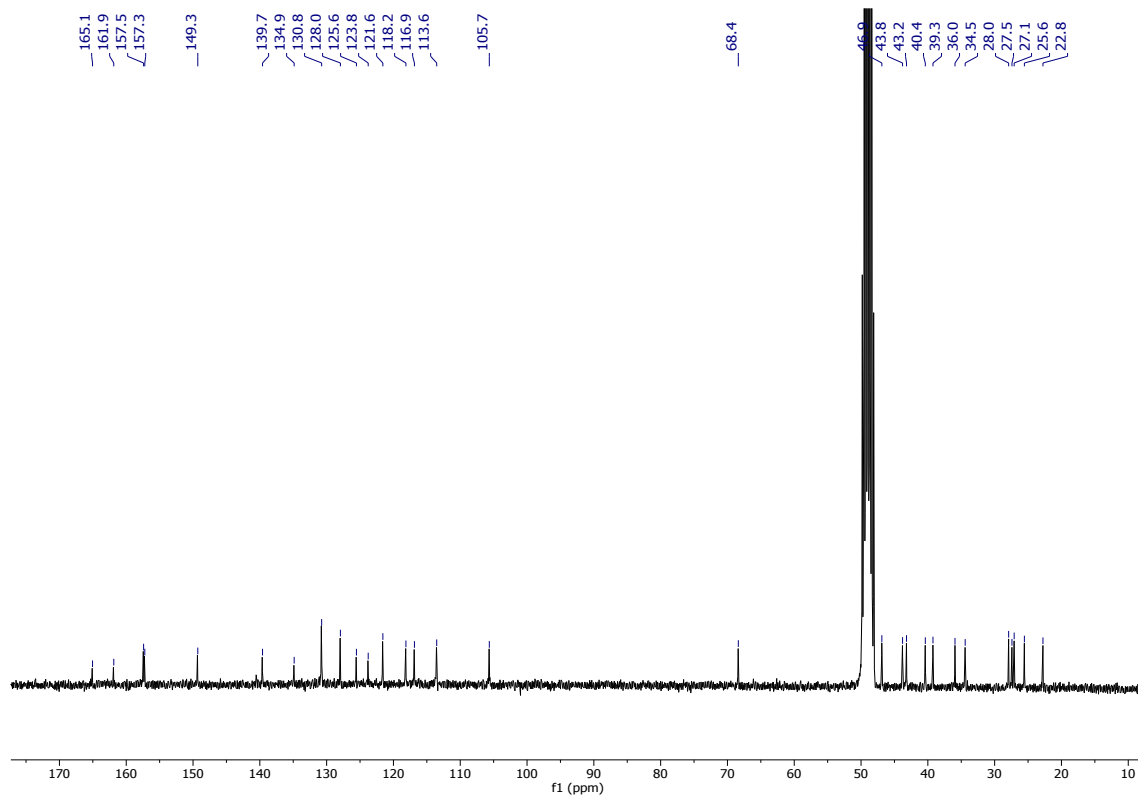

# Compound 12r

ARP-VI-42Colf21\_40oC

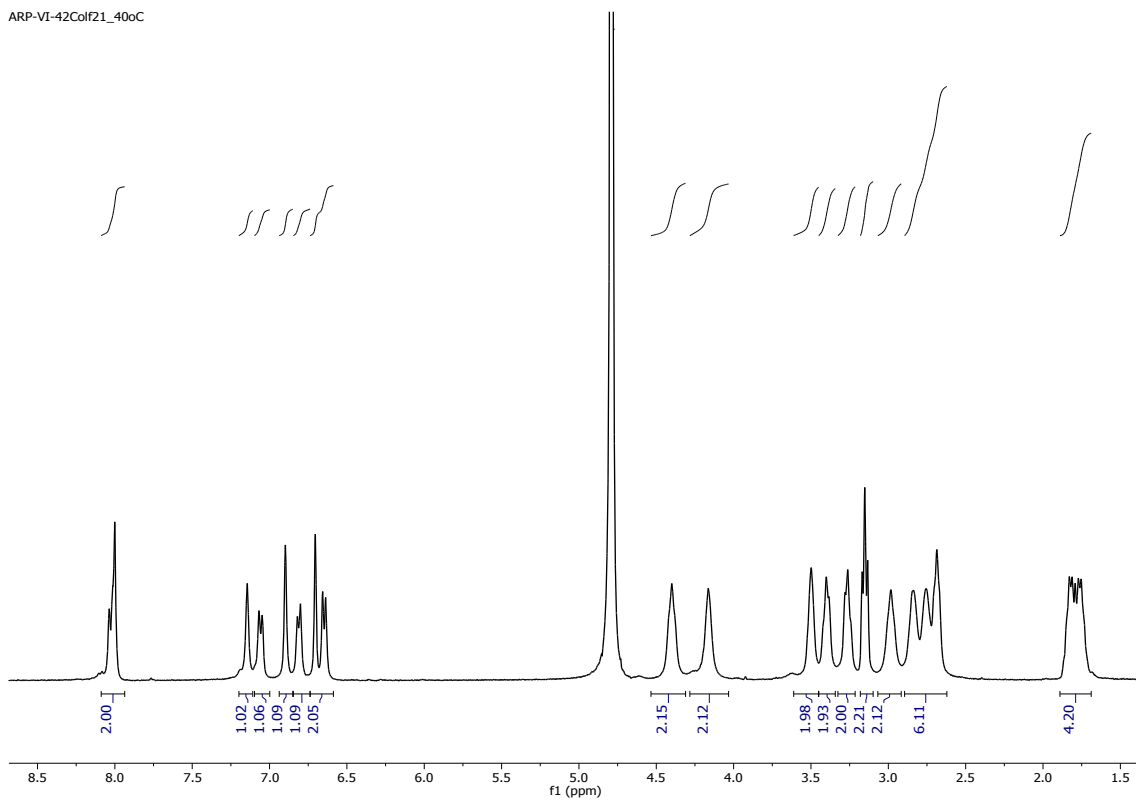

164.5  
160.7  
158.2  
156.3  
156.1  
149.1  
138.1  
134.2  
129.7  
127.9  
127.8  
125.3  
122.7  
120.8  
115.7  
112.9  
109.1  
105.2  
71.7  
68.0  
46.3  
43.2  
39.9  
38.4  
34.7  
33.3  
29.8  
27.0  
25.9  
24.7

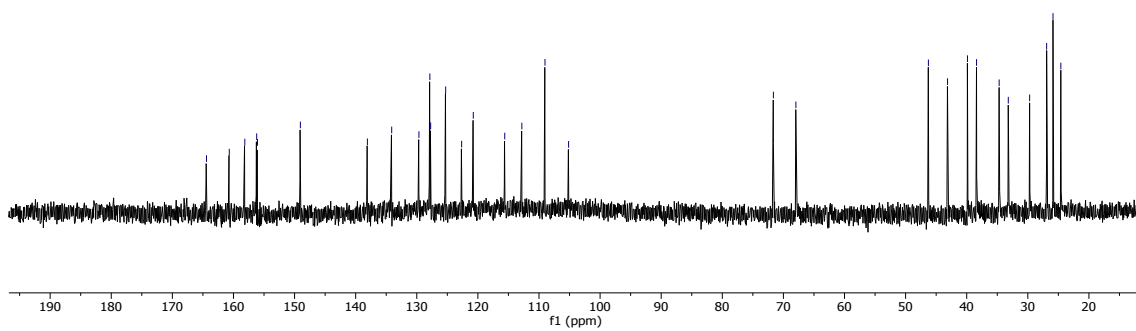

# Compound 12s

ARP-VIII-51COLF23-27 700C

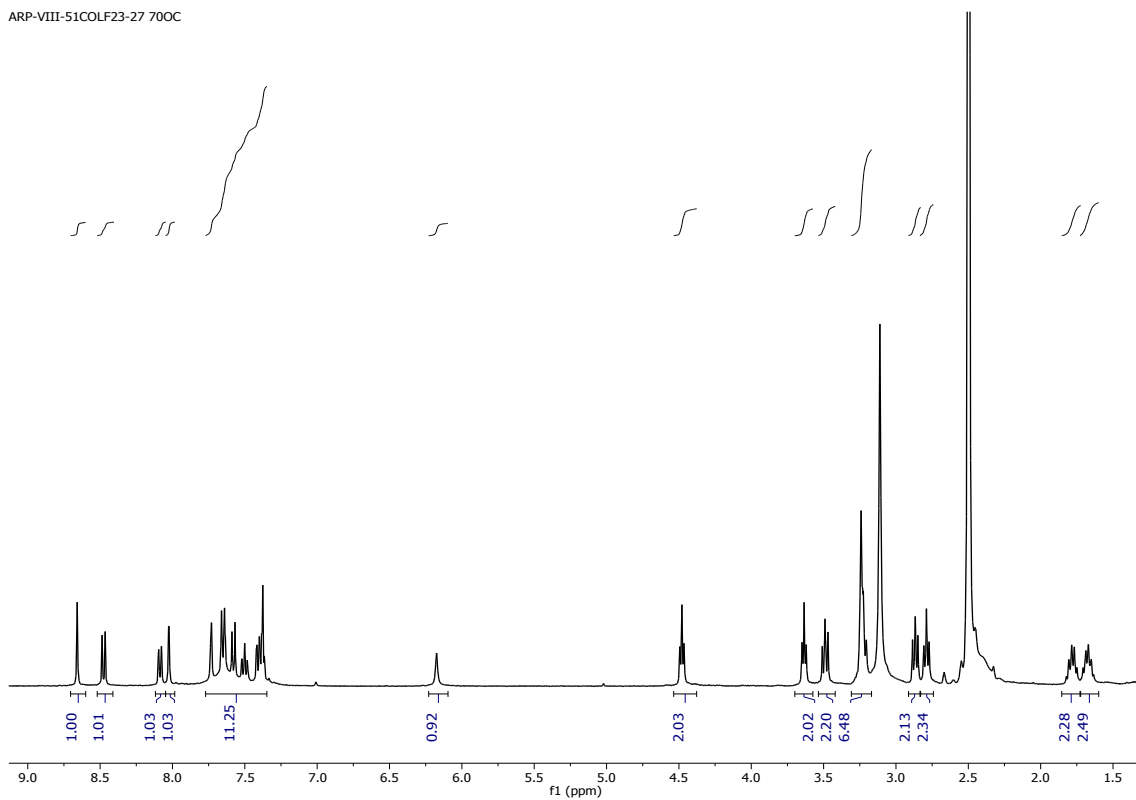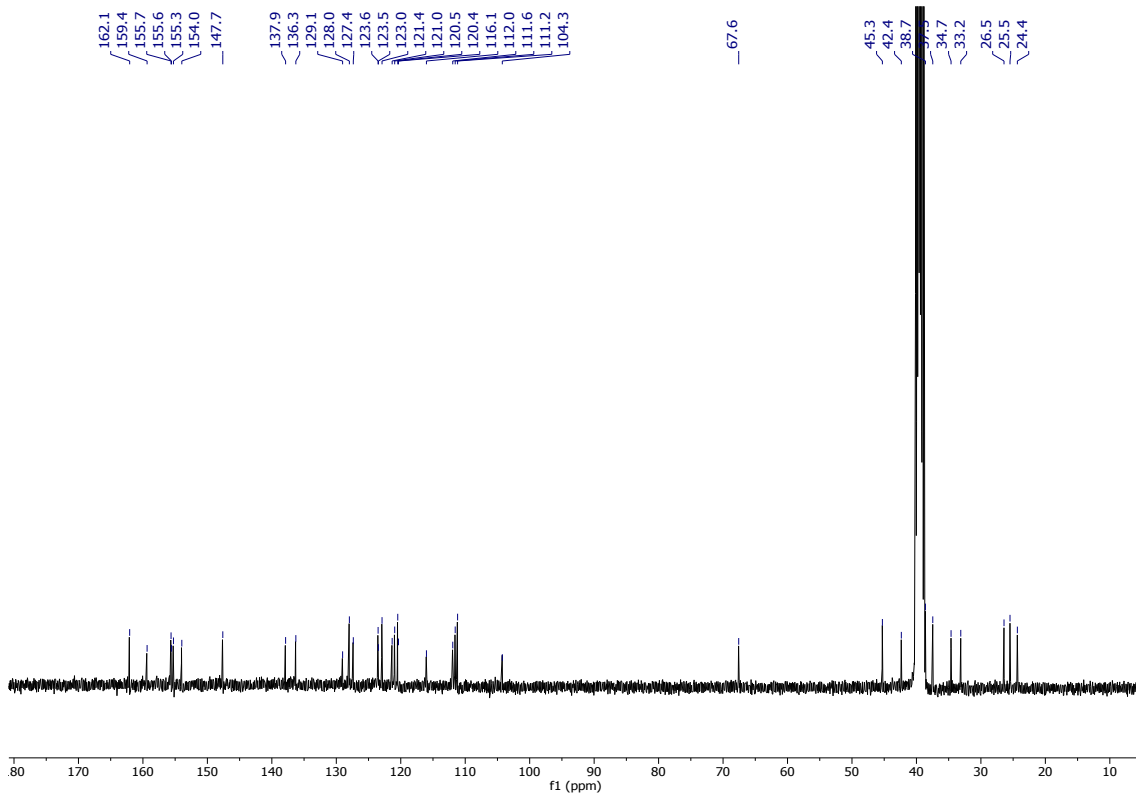

# Truncated compound 13

ARP-VIII-66COLF9-26

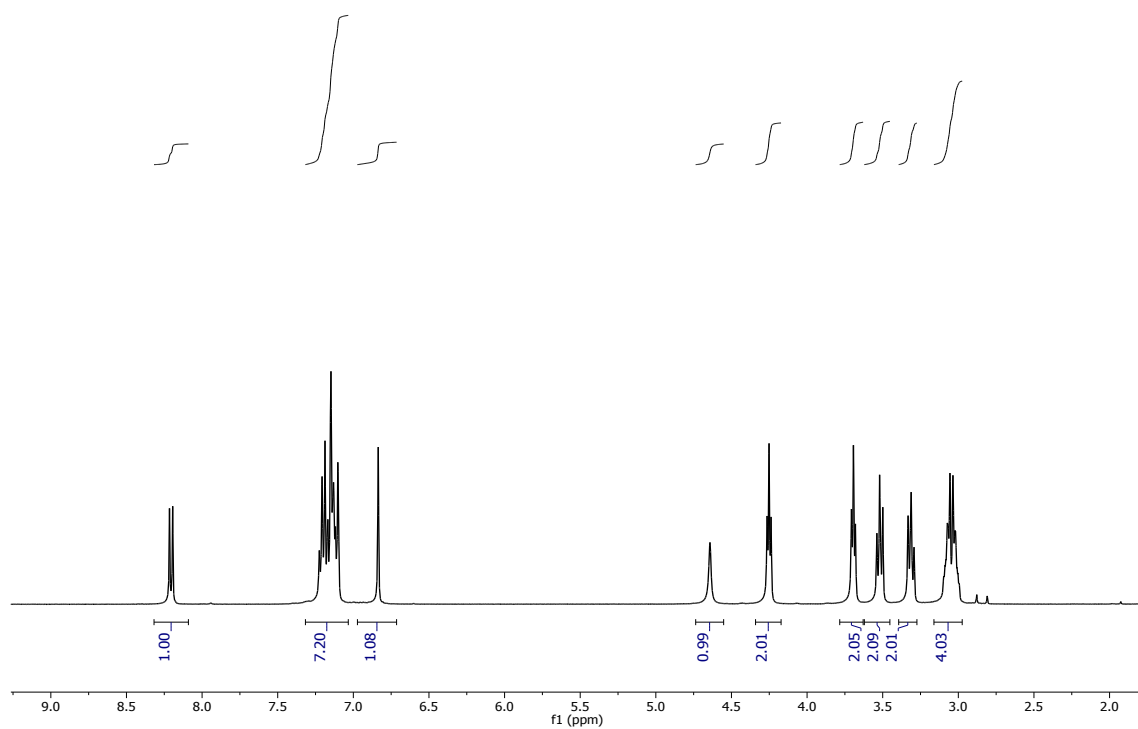

ARP-VIII-66-ColF9-26.10.fid  
ARP-VIII-66-ColF9-26

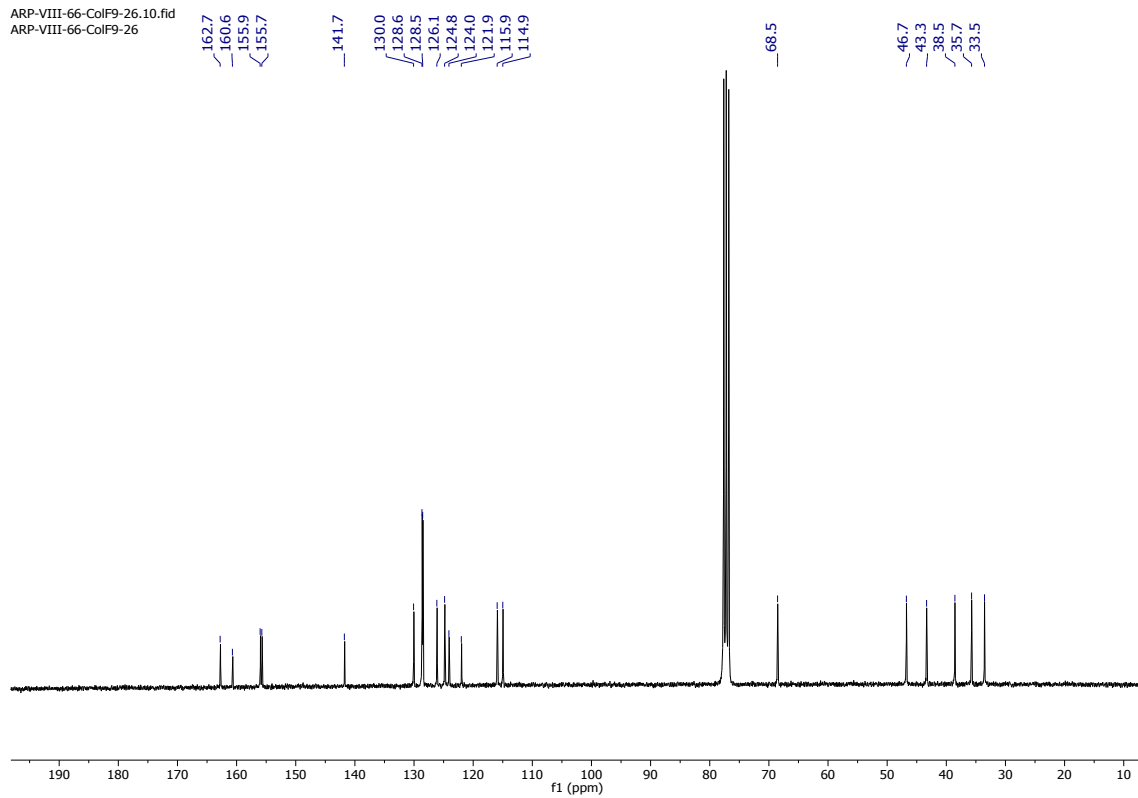



# Truncated compound 14

ARP-IX-53COLF3-21

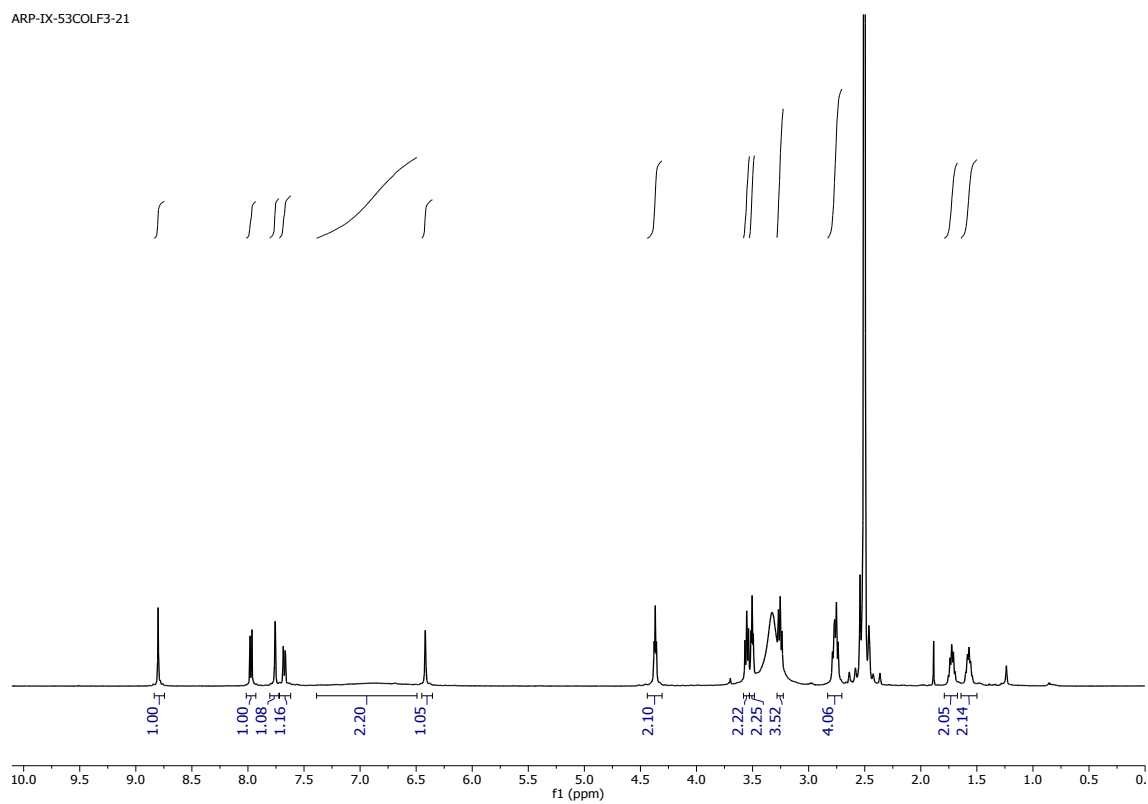

ARP-IX-53COLF3-21-13C

STANDARD PROTON PARAMETER

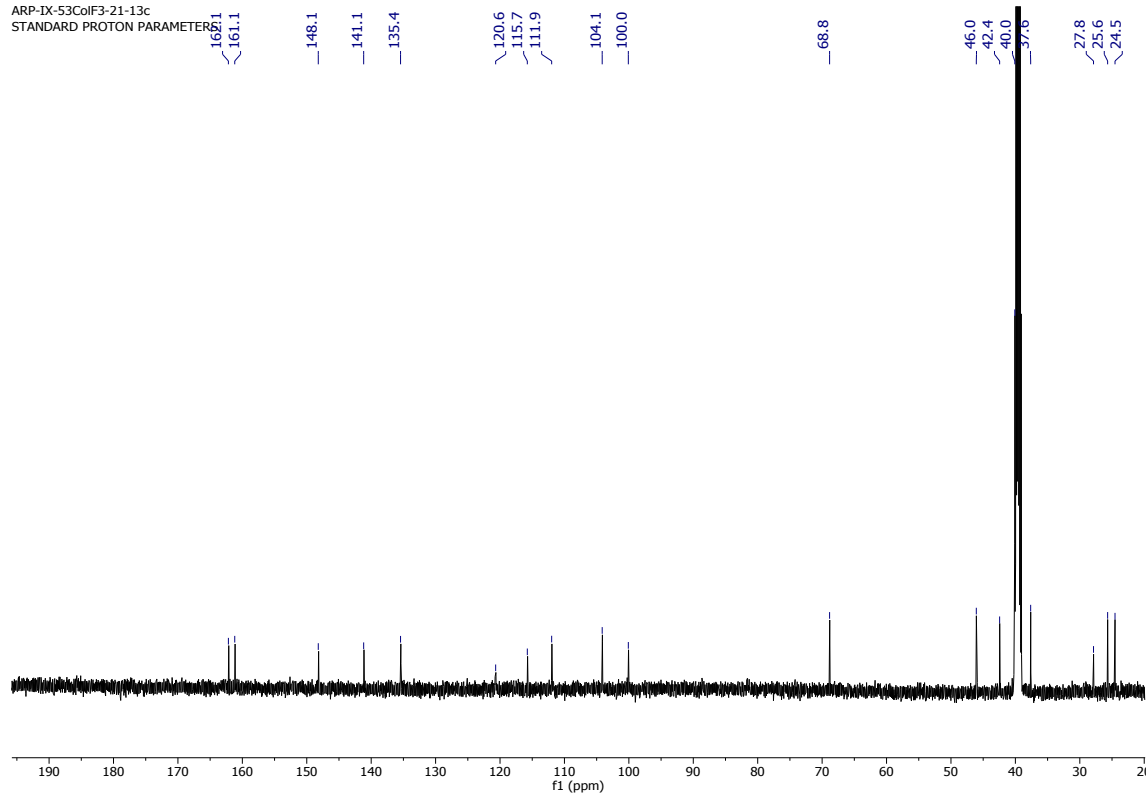

# Compound 19a

ARP-VII-47COLF10-13

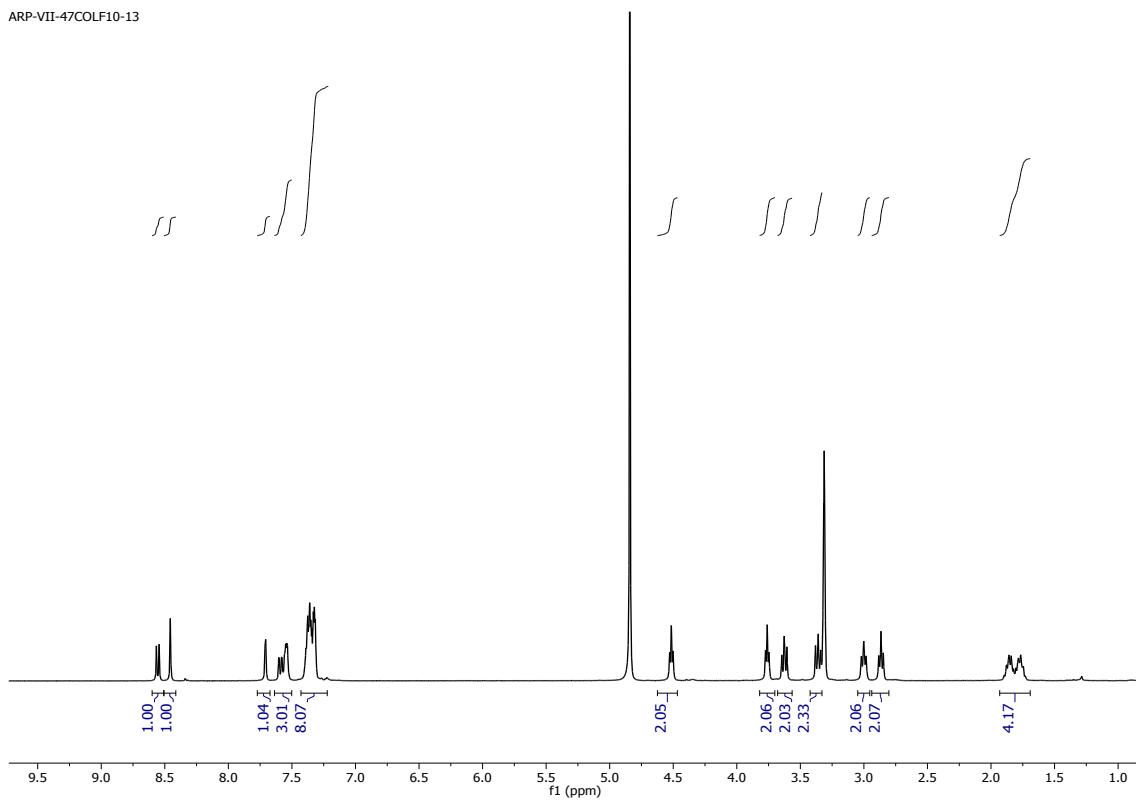

ARP-VII-47CoIF10-13.10.fid  
ARP-VII-47CoIF10-13

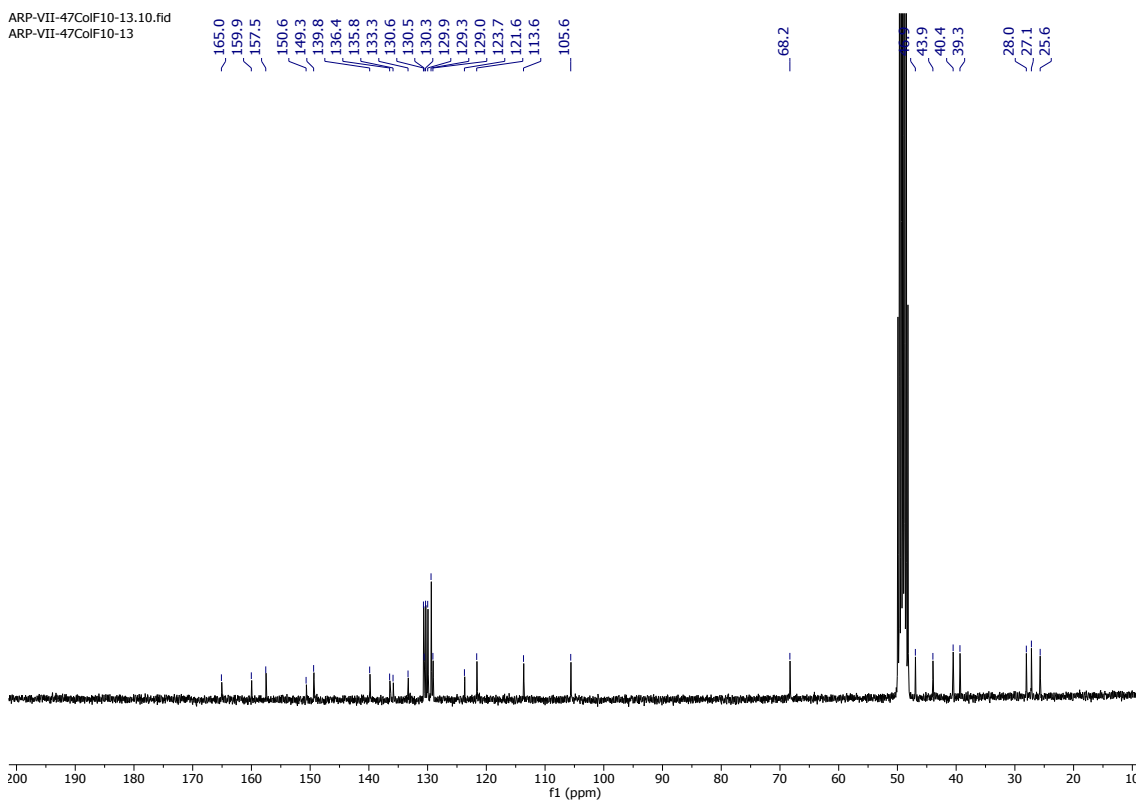

# Compound 19b

ARP-IX-10COLF22-24

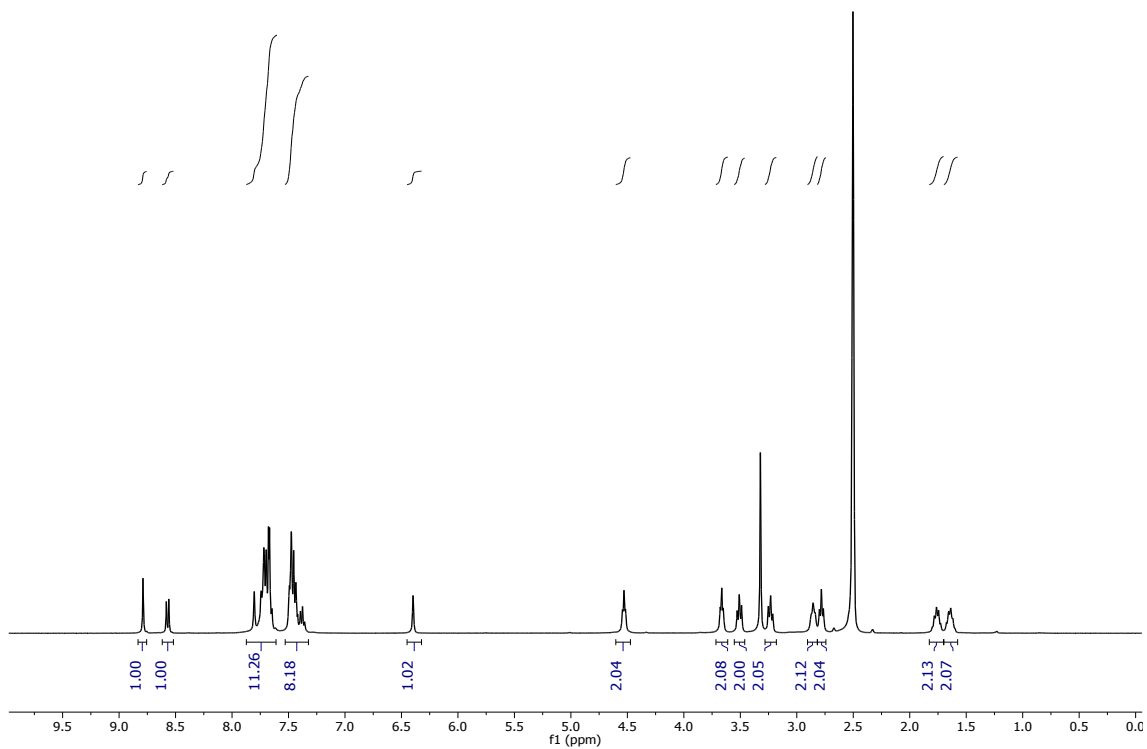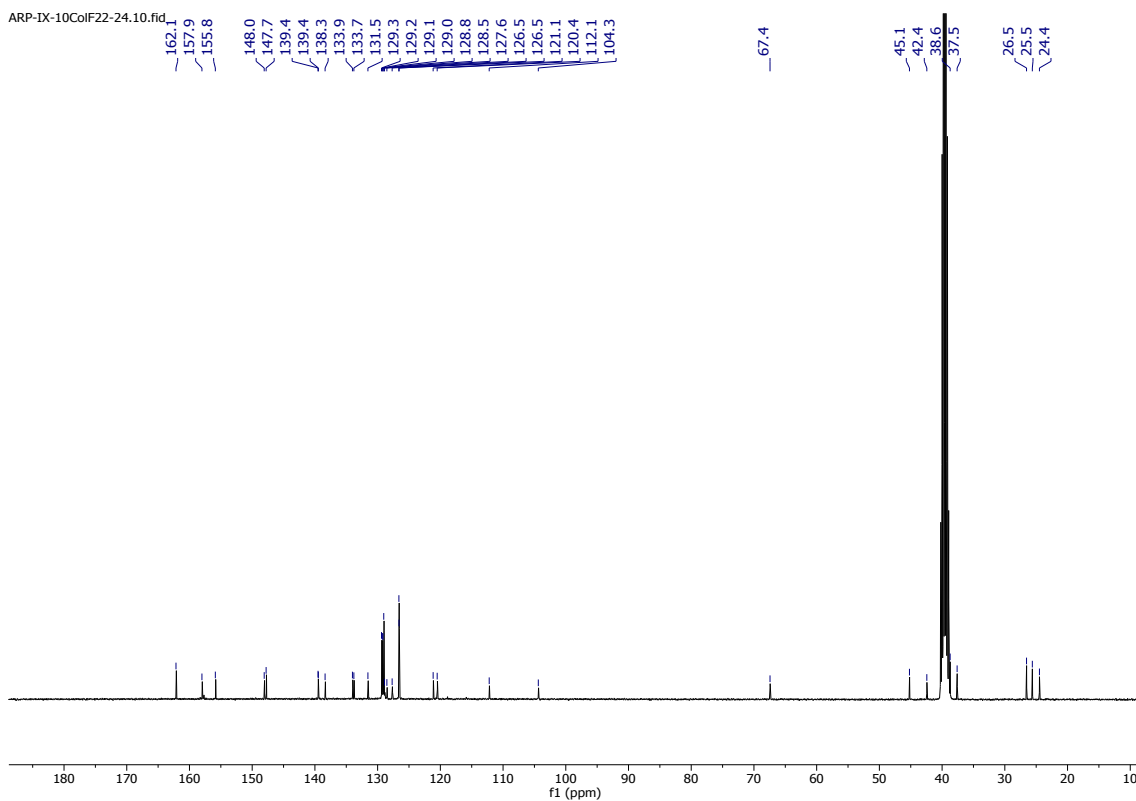

# Compound 19c

ARP-IX-19COLF25-29

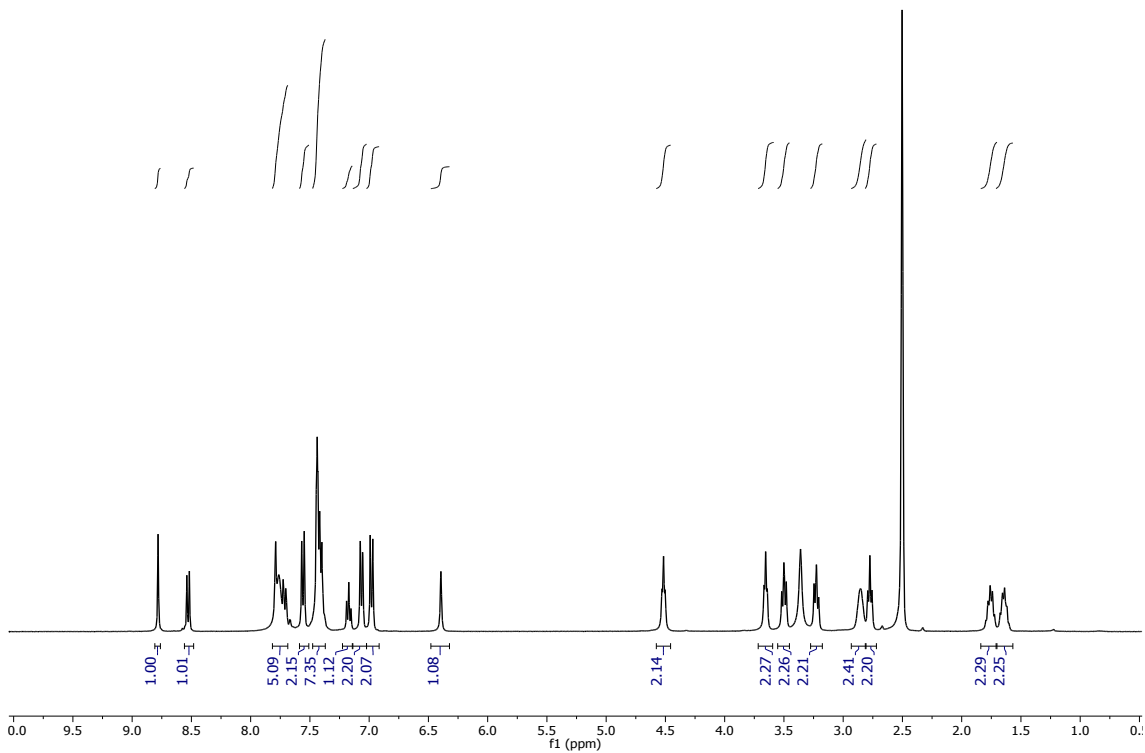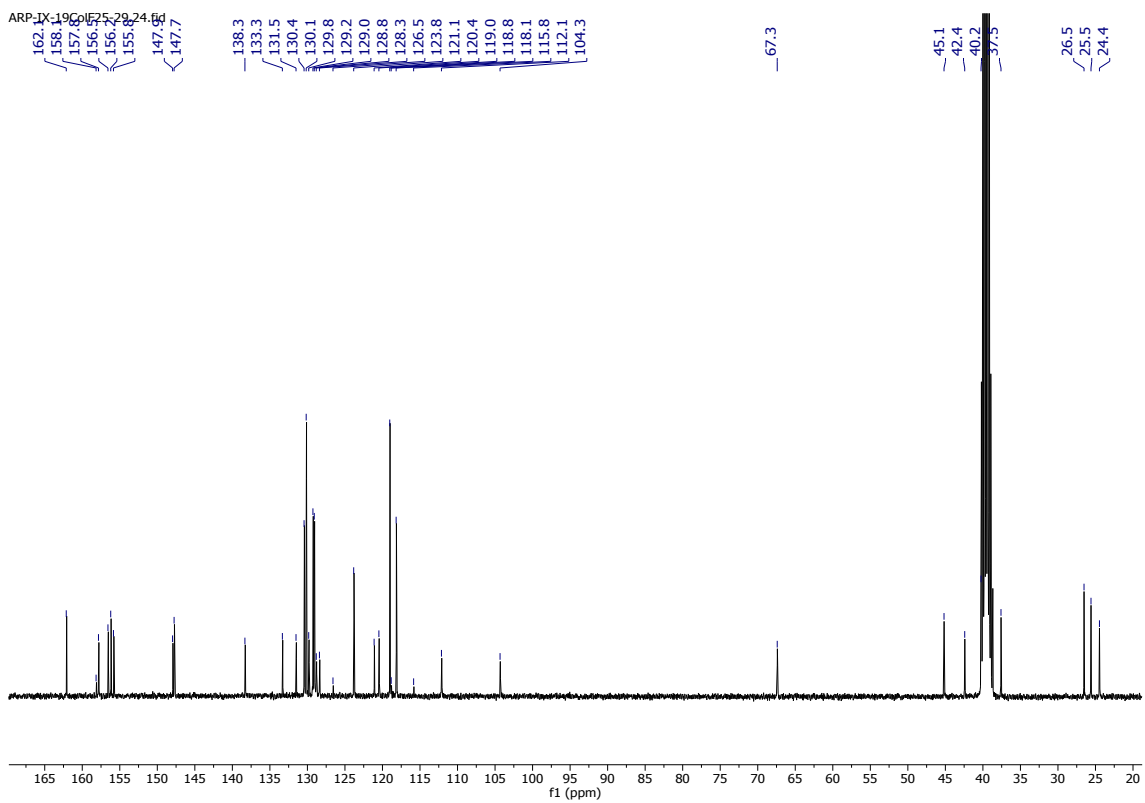

# Compound 19d

ARP-XI-1COLF13-18

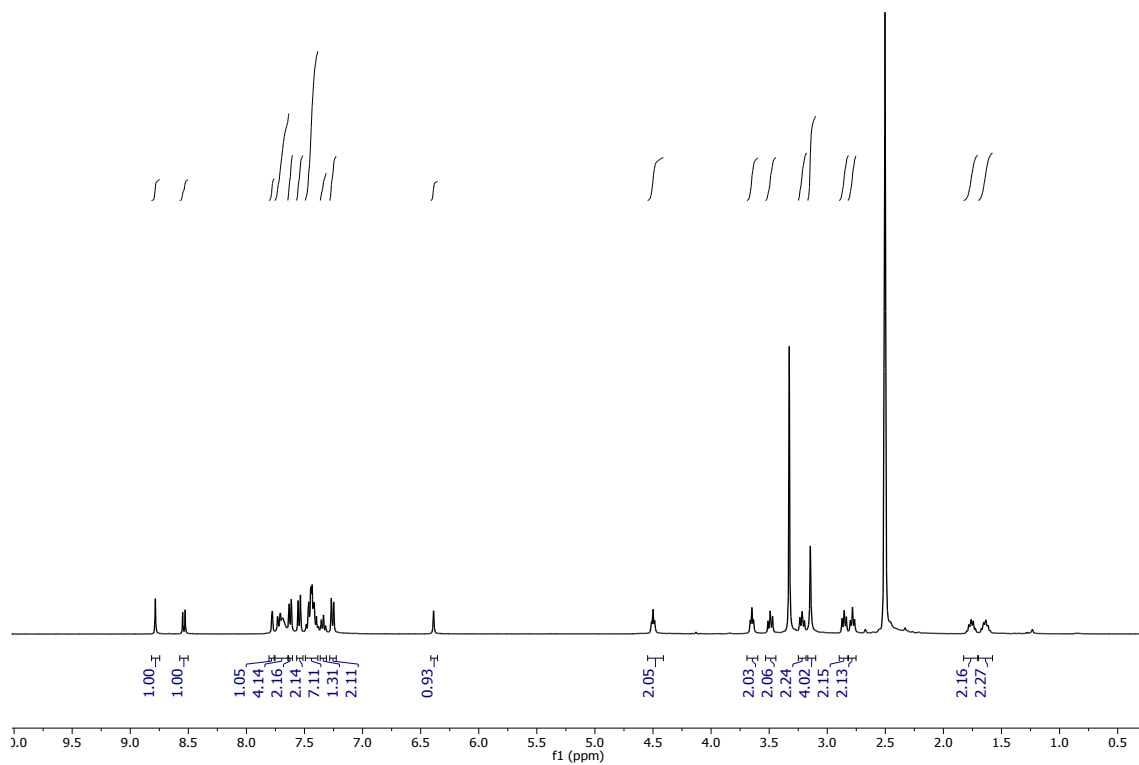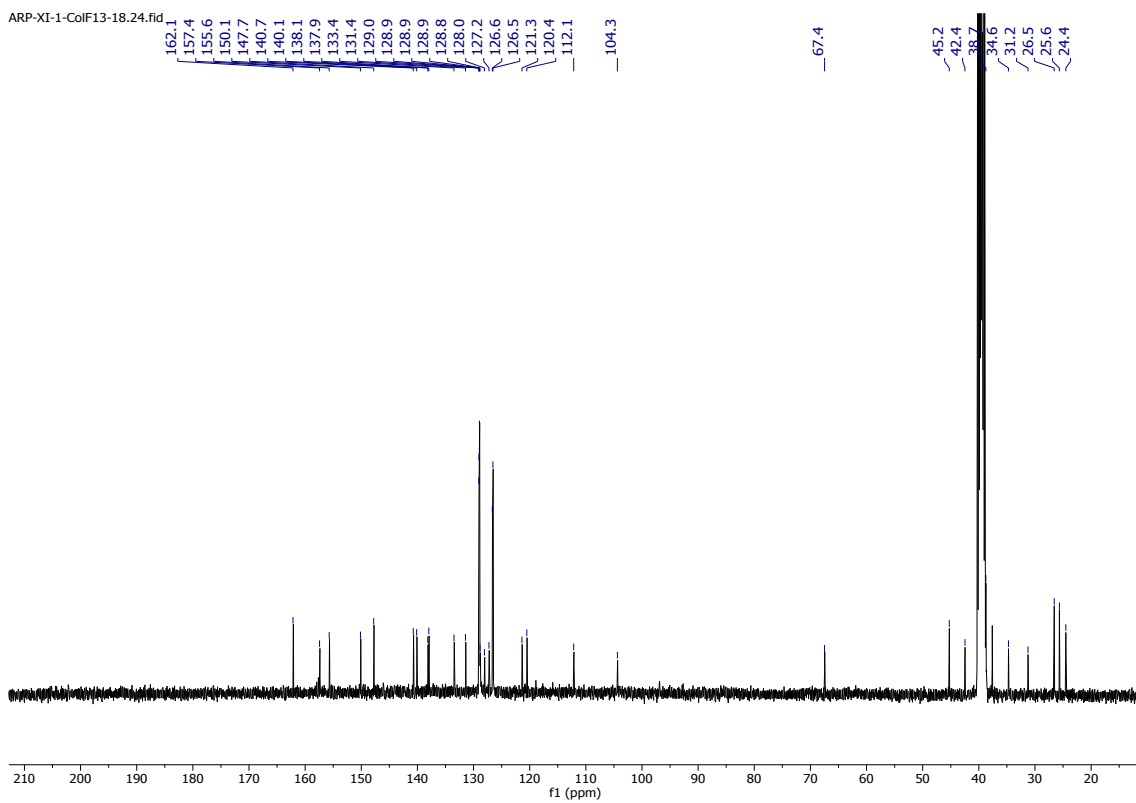

# Compound 19e

ARP-XI-7COLF45-56

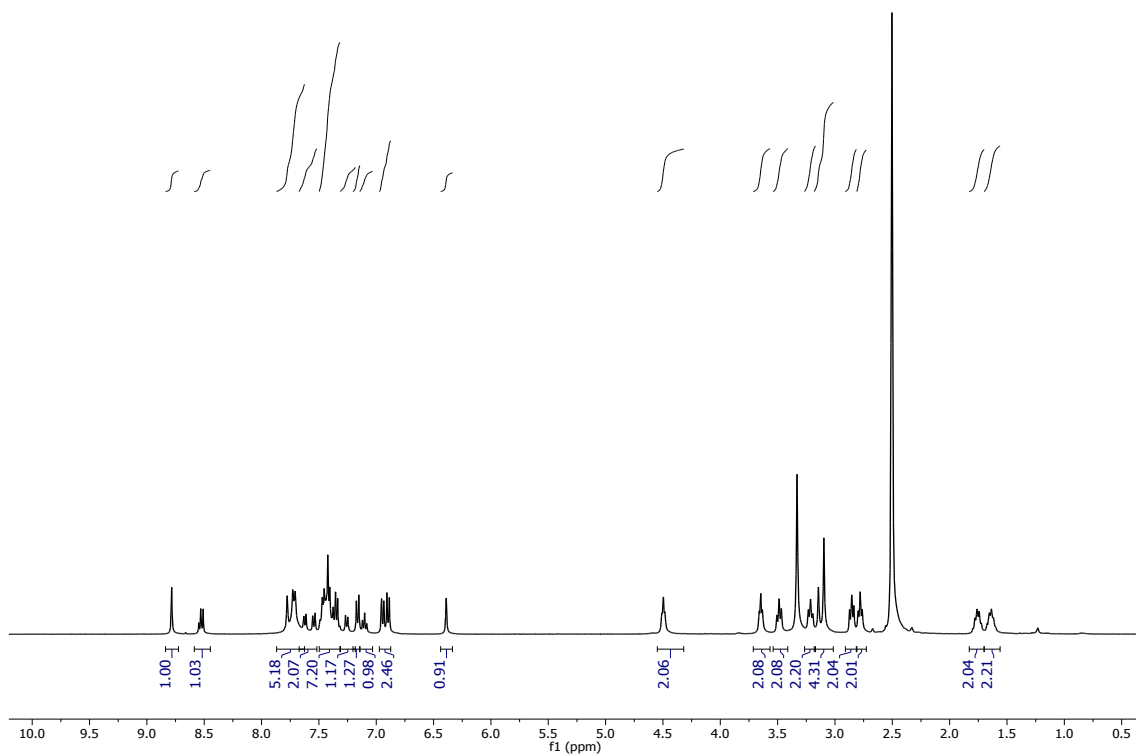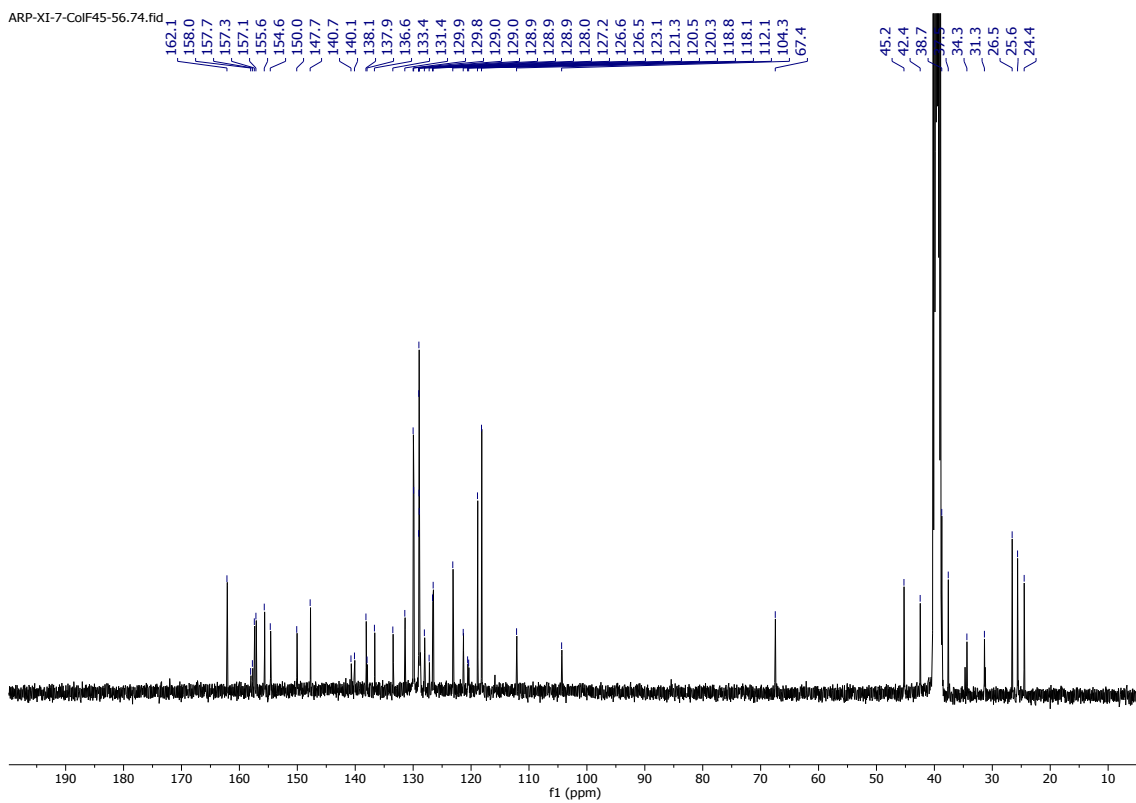

# Symmetrical compound 22

ARP-IX-3COLF12-13

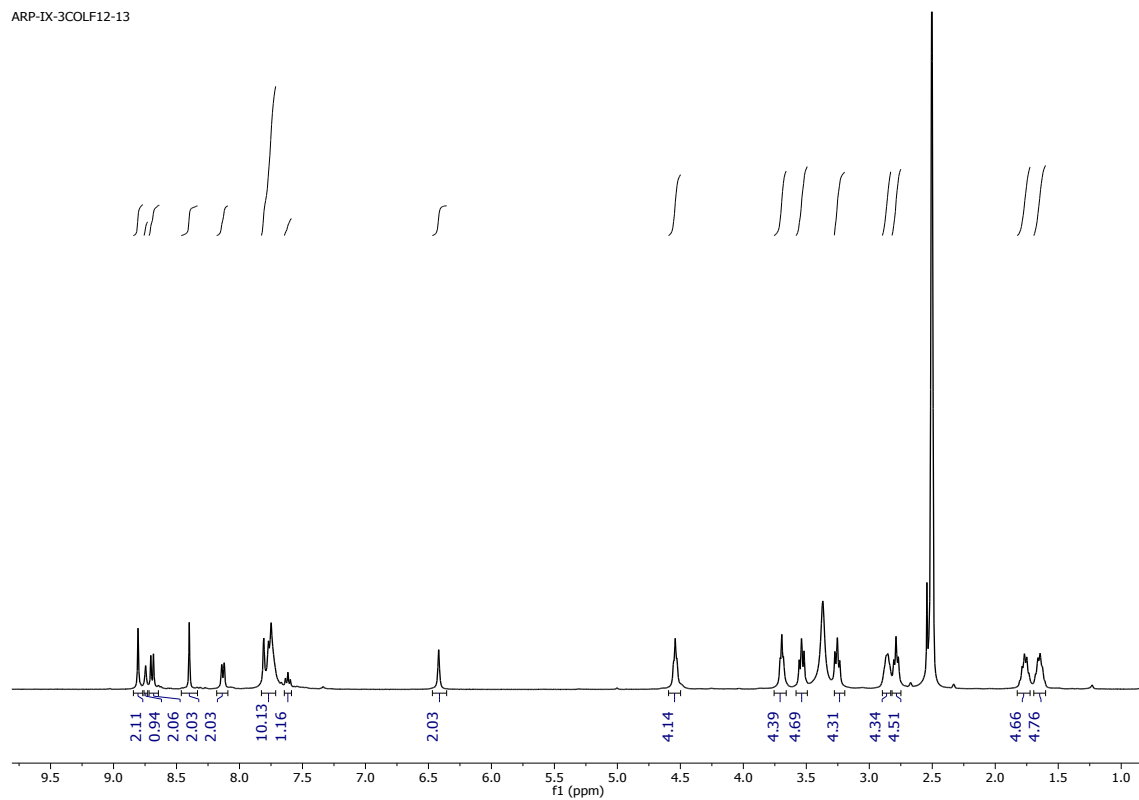

ARP-IX-3ColF12-13.21.fid

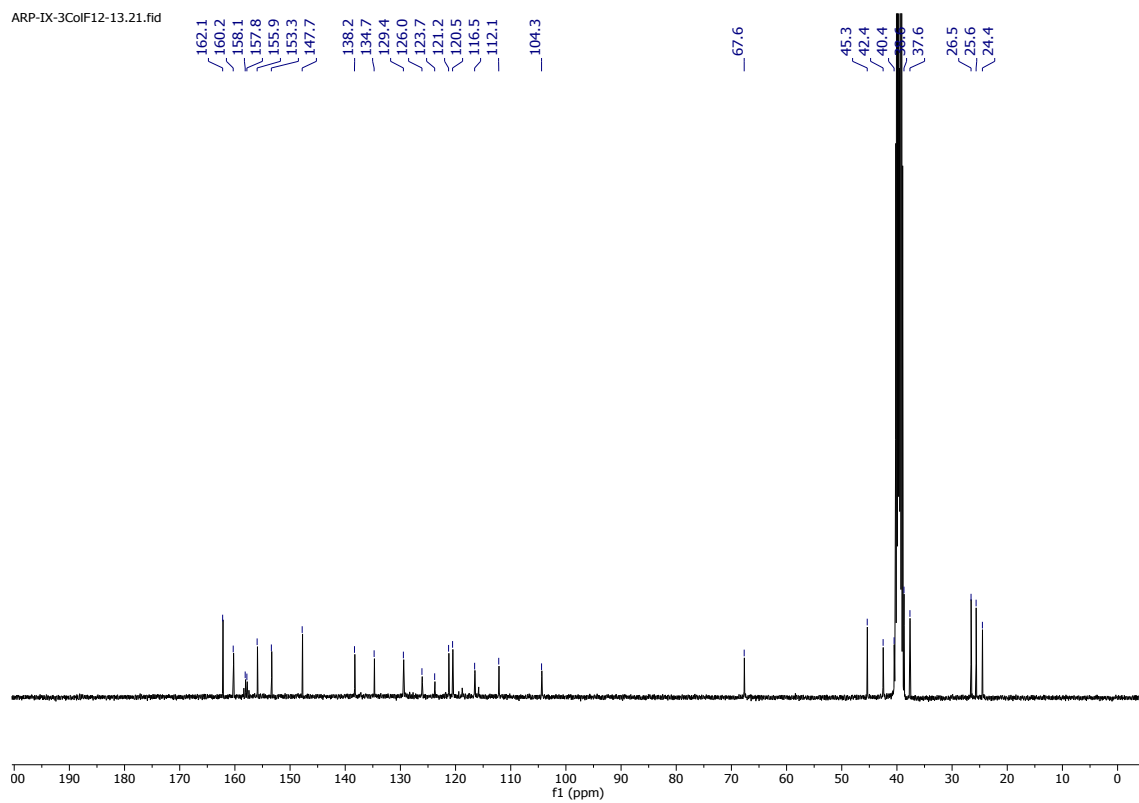

## HRMS of final compounds

### Compound 12a

Compound Table

| Compound Label                                                         | RT   | Mass      | Abund | Formula                                                         | Tgt Mass  | Diff (ppm) |
|------------------------------------------------------------------------|------|-----------|-------|-----------------------------------------------------------------|-----------|------------|
| Cpd 1: C <sub>28</sub> H <sub>33</sub> N <sub>7</sub> O <sub>2</sub> S | 2.39 | 531.24236 | 6661  | C <sub>28</sub> H <sub>33</sub> N <sub>7</sub> O <sub>2</sub> S | 531.24164 | 1.35       |

| Compound Label                                                         | RT   | Algorithm       | Mass      |
|------------------------------------------------------------------------|------|-----------------|-----------|
| Cpd 1: C <sub>28</sub> H <sub>33</sub> N <sub>7</sub> O <sub>2</sub> S | 2.39 | Find By Formula | 531.24236 |

MS Zoomed Spectrum

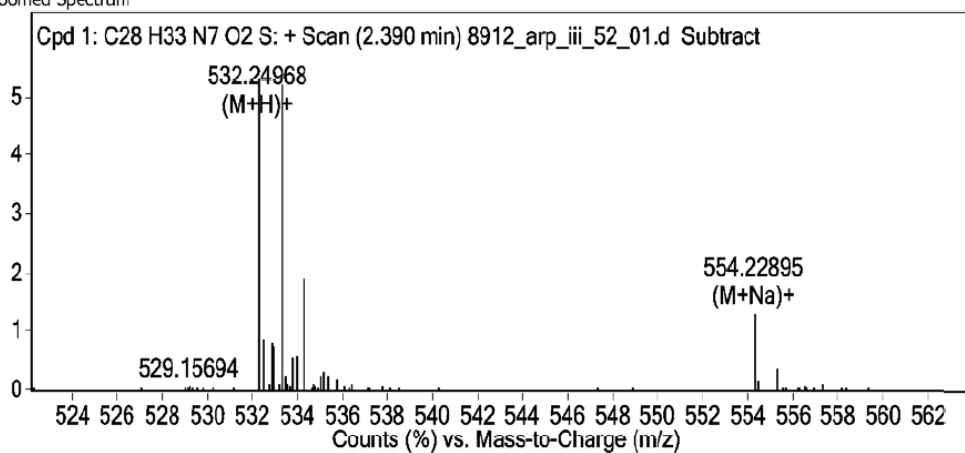

### Compound 12b

Compound Table

| Compound Label                                                         | RT    | Mass      | Abund | Formula                                                         | Tgt Mass  | Diff (ppm) |
|------------------------------------------------------------------------|-------|-----------|-------|-----------------------------------------------------------------|-----------|------------|
| Cpd 1: C <sub>32</sub> H <sub>35</sub> N <sub>7</sub> O <sub>2</sub> S | 1.999 | 581.25722 | 96645 | C <sub>32</sub> H <sub>35</sub> N <sub>7</sub> O <sub>2</sub> S | 581.25729 | -0.13      |

| Compound Label                                                         | RT    | Algorithm       | Mass      |
|------------------------------------------------------------------------|-------|-----------------|-----------|
| Cpd 1: C <sub>32</sub> H <sub>35</sub> N <sub>7</sub> O <sub>2</sub> S | 1.999 | Find By Formula | 581.25722 |

MS Zoomed Spectrum

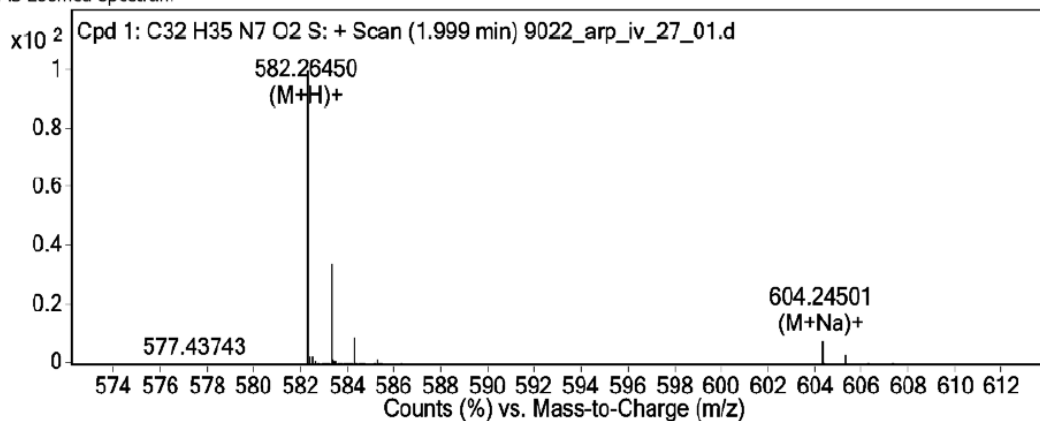



## Compound 12c

Compound Table

| Compound Label                                                         | RT    | Mass    | Abund | Formula                                                         | Tgt Mass  | Diff (ppm) |
|------------------------------------------------------------------------|-------|---------|-------|-----------------------------------------------------------------|-----------|------------|
| Cpd 1: C <sub>34</sub> H <sub>37</sub> N <sub>7</sub> O <sub>2</sub> S | 0.256 | 607.274 | 5729  | C <sub>34</sub> H <sub>37</sub> N <sub>7</sub> O <sub>2</sub> S | 607.27294 | 1.73       |

| Compound Label                                                         | RT    | Algorithm       | Mass    |
|------------------------------------------------------------------------|-------|-----------------|---------|
| Cpd 1: C <sub>34</sub> H <sub>37</sub> N <sub>7</sub> O <sub>2</sub> S | 0.256 | Find By Formula | 607.274 |

MS Zoomed Spectrum

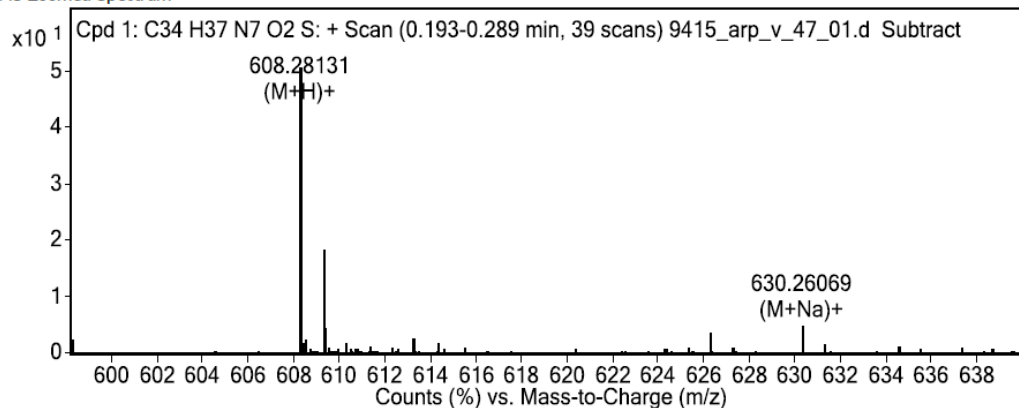

## Compound 12d

Compound Table

| Compound Label                                                         | RT    | Mass      | Abund  | Formula                                                         | Tgt Mass  | Diff (ppm) |
|------------------------------------------------------------------------|-------|-----------|--------|-----------------------------------------------------------------|-----------|------------|
| Cpd 1: C <sub>28</sub> H <sub>32</sub> N <sub>6</sub> O <sub>3</sub> S | 0.415 | 532.22575 | 198539 | C <sub>28</sub> H <sub>32</sub> N <sub>6</sub> O <sub>3</sub> S | 532.22566 | 0.17       |

| Compound Label                                                         | RT    | Algorithm       | Mass      |
|------------------------------------------------------------------------|-------|-----------------|-----------|
| Cpd 1: C <sub>28</sub> H <sub>32</sub> N <sub>6</sub> O <sub>3</sub> S | 0.415 | Find By Formula | 532.22575 |

MS Zoomed Spectrum

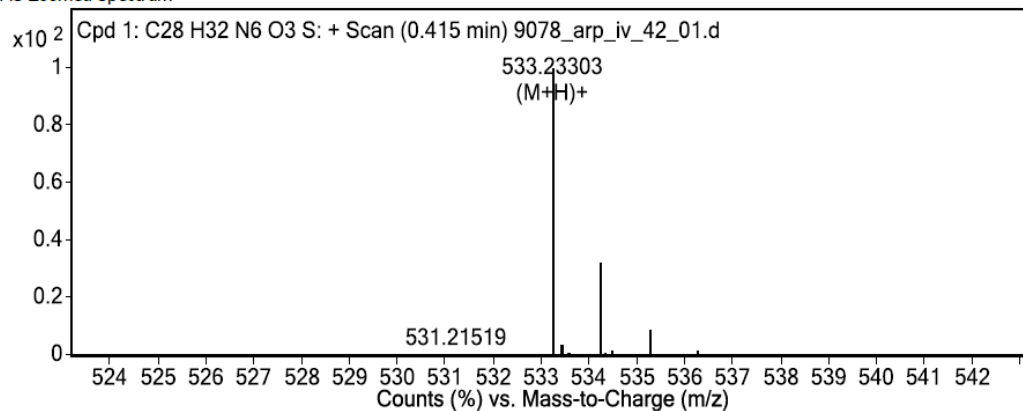

## Compound 12e

**Compound Table**

| Compound Label                                                         | RT    | Mass      | Abund  | Formula                                                         | Tgt Mass  | Diff (ppm) |
|------------------------------------------------------------------------|-------|-----------|--------|-----------------------------------------------------------------|-----------|------------|
| Cpd 1: C <sub>28</sub> H <sub>32</sub> N <sub>6</sub> O <sub>2</sub> S | 1.559 | 516.23101 | 129933 | C <sub>28</sub> H <sub>32</sub> N <sub>6</sub> O <sub>2</sub> S | 516.23075 | 0.52       |

| Compound Label                                                         | RT    | Algorithm       | Mass      |
|------------------------------------------------------------------------|-------|-----------------|-----------|
| Cpd 1: C <sub>28</sub> H <sub>32</sub> N <sub>6</sub> O <sub>2</sub> S | 1.559 | Find By Formula | 516.23101 |

MS Zoomed Spectrum

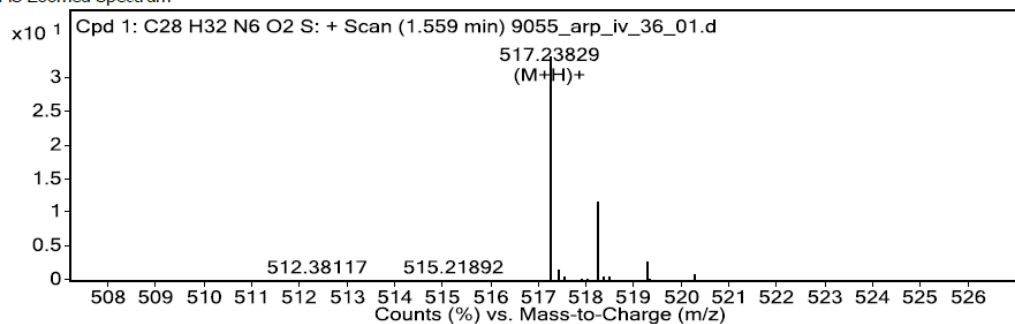

## Compound 12f

**Compound Table**

| Compound Label                                                         | RT    | Mass      | Abund | Formula                                                         | Tgt Mass  | Diff (ppm) |
|------------------------------------------------------------------------|-------|-----------|-------|-----------------------------------------------------------------|-----------|------------|
| Cpd 1: C <sub>34</sub> H <sub>36</sub> N <sub>6</sub> O <sub>2</sub> S | 0.267 | 592.26096 | 32289 | C <sub>34</sub> H <sub>36</sub> N <sub>6</sub> O <sub>2</sub> S | 592.26205 | -1.83      |

| Compound Label                                                         | RT    | Algorithm       | Mass      |
|------------------------------------------------------------------------|-------|-----------------|-----------|
| Cpd 1: C <sub>34</sub> H <sub>36</sub> N <sub>6</sub> O <sub>2</sub> S | 0.267 | Find By Formula | 592.26096 |

MS Zoomed Spectrum

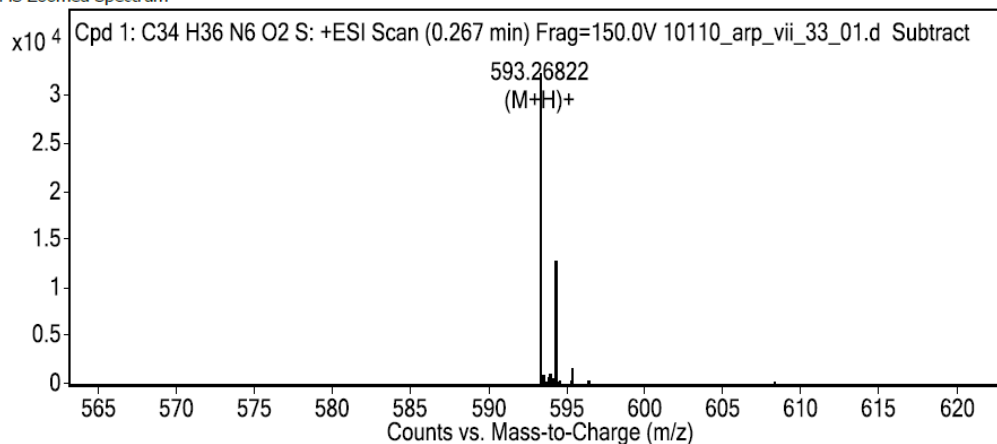

## Compound 12g

Compound Table

| Compound Label                                                         | RT    | Mass      | Abund | Formula                                                         | Tgt Mass  | Diff (ppm) |
|------------------------------------------------------------------------|-------|-----------|-------|-----------------------------------------------------------------|-----------|------------|
| Cpd 1: C <sub>28</sub> H <sub>30</sub> N <sub>6</sub> O <sub>4</sub> S | 0.199 | 546.20591 | 20993 | C <sub>28</sub> H <sub>30</sub> N <sub>6</sub> O <sub>4</sub> S | 546.20492 | 1.81       |

| Compound Label                                                         | RT    | Algorithm       | Mass      |
|------------------------------------------------------------------------|-------|-----------------|-----------|
| Cpd 1: C <sub>28</sub> H <sub>30</sub> N <sub>6</sub> O <sub>4</sub> S | 0.199 | Find By Formula | 546.20591 |

MS Zoomed Spectrum

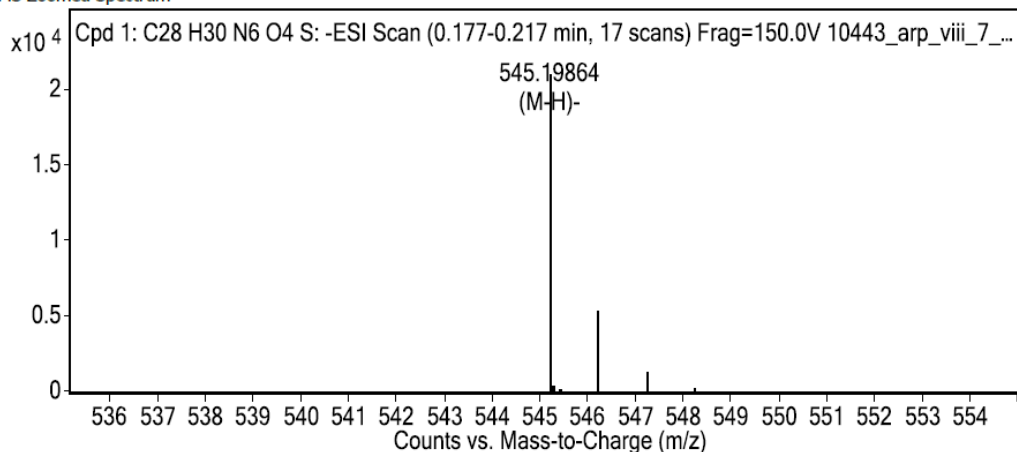

## Compound 12h

Compound Table

| Compound Label                                                         | RT    | Mass     | Abund  | Formula                                                         | Tgt Mass  | Diff (ppm) |
|------------------------------------------------------------------------|-------|----------|--------|-----------------------------------------------------------------|-----------|------------|
| Cpd 1: C <sub>27</sub> H <sub>31</sub> N <sub>7</sub> O <sub>2</sub> S | 2.666 | 517.2266 | 123330 | C <sub>27</sub> H <sub>31</sub> N <sub>7</sub> O <sub>2</sub> S | 517.22599 | 1.17       |

| Compound Label                                                         | RT    | Algorithm       | Mass     |
|------------------------------------------------------------------------|-------|-----------------|----------|
| Cpd 1: C <sub>27</sub> H <sub>31</sub> N <sub>7</sub> O <sub>2</sub> S | 2.666 | Find By Formula | 517.2266 |

MS Zoomed Spectrum

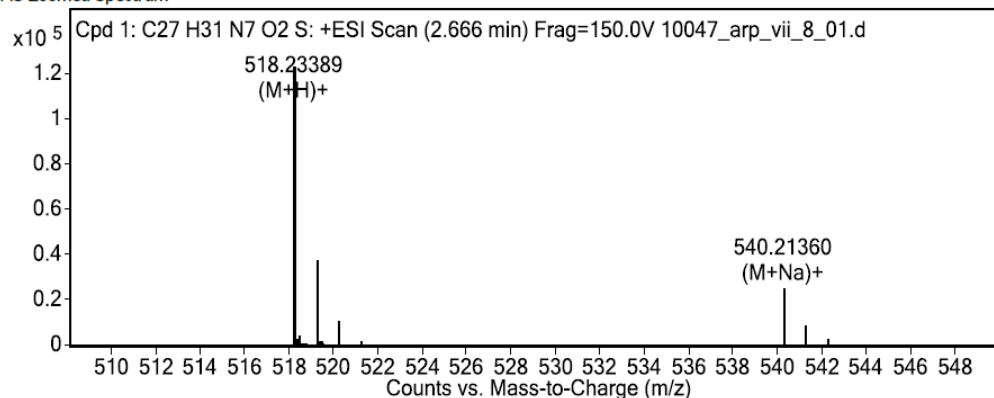

## Compound 12i

Compound Table

| Compound Label         | RT    | Mass      | Abund | Formula         | Tgt Mass  | Diff (ppm) |
|------------------------|-------|-----------|-------|-----------------|-----------|------------|
| Cpd 1: C33 H35 N7 O2 S | 1.073 | 593.25724 | 35187 | C33 H35 N7 O2 S | 593.25729 | -0.09      |

| Compound Label         | RT    | Algorithm       | Mass      |
|------------------------|-------|-----------------|-----------|
| Cpd 1: C33 H35 N7 O2 S | 1.073 | Find By Formula | 593.25724 |

MS Zoomed Spectrum

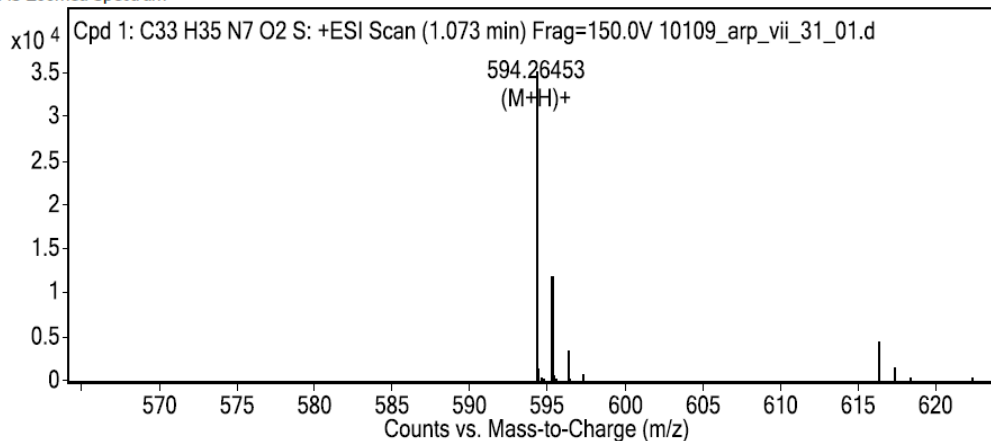

## Compound 12j

Compound Table

| Compound Label        | RT   | Mass      | Abund | Formula        | Tgt Mass  | Diff (ppm) |
|-----------------------|------|-----------|-------|----------------|-----------|------------|
| Cpd 1: C24 H27 N5 O S | 2.45 | 433.19309 | 37751 | C24 H27 N5 O S | 433.19363 | -1.25      |

| Compound Label        | RT   | Algorithm       | Mass      |
|-----------------------|------|-----------------|-----------|
| Cpd 1: C24 H27 N5 O S | 2.45 | Find By Formula | 433.19309 |

MS Zoomed Spectrum

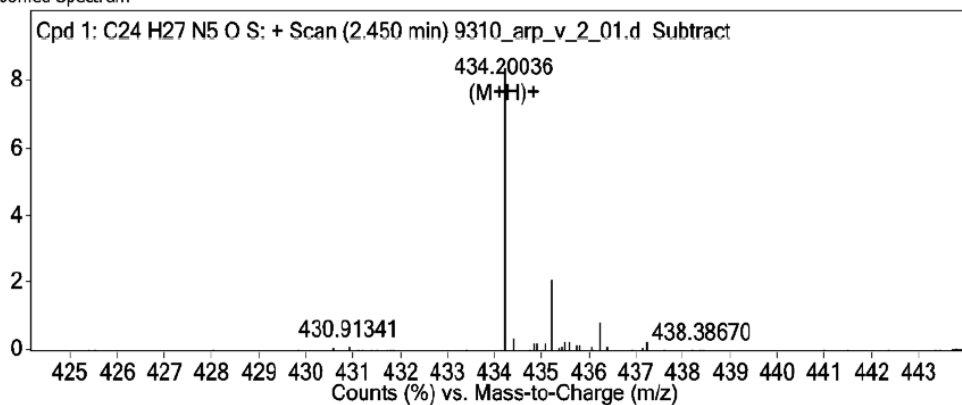

## Compound 12k

Compound Table

| Compound Label                                                         | RT    | Mass      | Abund  | Formula                                                         | Tgt Mass  | Diff (ppm) |
|------------------------------------------------------------------------|-------|-----------|--------|-----------------------------------------------------------------|-----------|------------|
| Cpd 1: C <sub>30</sub> H <sub>31</sub> N <sub>5</sub> O <sub>3</sub> S | 1.155 | 509.22563 | 191135 | C <sub>30</sub> H <sub>31</sub> N <sub>5</sub> O <sub>3</sub> S | 509.22493 | 1.37       |

| Compound Label                                                         | RT    | Algorithm       | Mass      |
|------------------------------------------------------------------------|-------|-----------------|-----------|
| Cpd 1: C <sub>30</sub> H <sub>31</sub> N <sub>5</sub> O <sub>3</sub> S | 1.155 | Find By Formula | 509.22563 |

MS Zoomed Spectrum

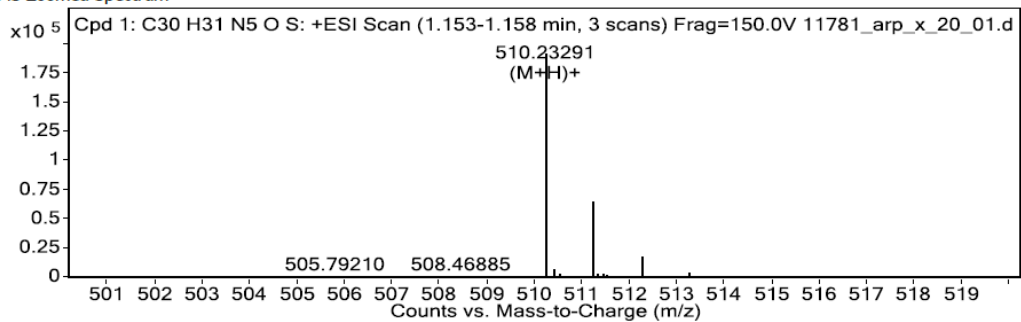

## Compound 12l

Compound Table

| Compound Label                                                         | RT    | Mass      | Abund  | Formula                                                         | Tgt Mass  | Diff (ppm) |
|------------------------------------------------------------------------|-------|-----------|--------|-----------------------------------------------------------------|-----------|------------|
| Cpd 1: C <sub>23</sub> H <sub>31</sub> N <sub>7</sub> O <sub>3</sub> S | 2.198 | 485.22033 | 384941 | C <sub>23</sub> H <sub>31</sub> N <sub>7</sub> O <sub>3</sub> S | 485.22091 | -1.19      |

| Compound Label                                                         | RT    | Algorithm       | Mass      |
|------------------------------------------------------------------------|-------|-----------------|-----------|
| Cpd 1: C <sub>23</sub> H <sub>31</sub> N <sub>7</sub> O <sub>3</sub> S | 2.198 | Find By Formula | 485.22033 |

MS Zoomed Spectrum

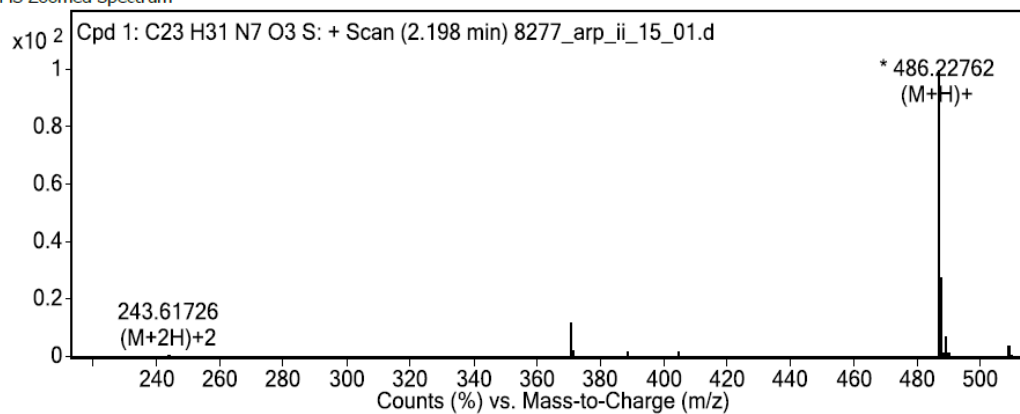

## Compound 12m

Compound Table

| Compound Label                                                         | RT    | Mass      | Abund | Formula                                                         | Tgt Mass  | Diff (ppm) |
|------------------------------------------------------------------------|-------|-----------|-------|-----------------------------------------------------------------|-----------|------------|
| Cpd 1: C <sub>25</sub> H <sub>35</sub> O <sub>2</sub> N <sub>7</sub> S | 2.794 | 497.25721 | 90073 | C <sub>25</sub> H <sub>35</sub> O <sub>2</sub> N <sub>7</sub> S | 497.25729 | -0.17      |

| Compound Label                                                         | RT    | Algorithm       | Mass      |
|------------------------------------------------------------------------|-------|-----------------|-----------|
| Cpd 1: C <sub>25</sub> H <sub>35</sub> O <sub>2</sub> N <sub>7</sub> S | 2.794 | Find By Formula | 497.25721 |

MS Zoomed Spectrum

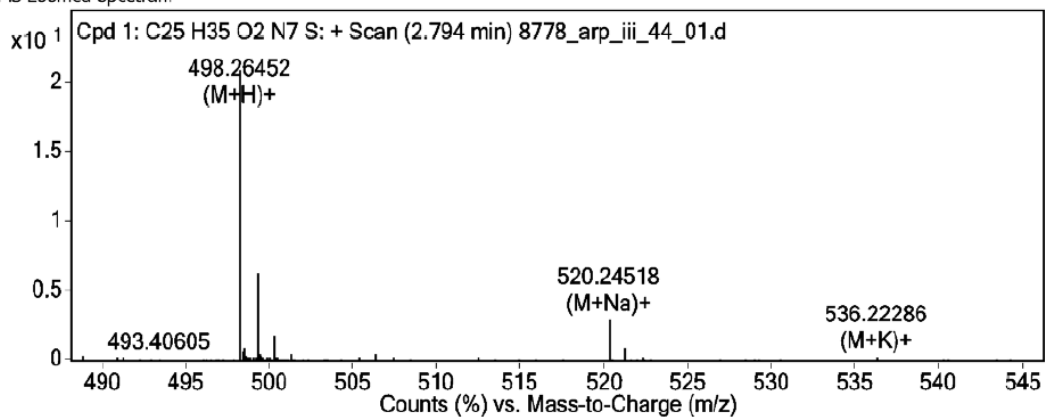

## Compound 12n

Compound Table

| Compound Label                                                         | RT    | Mass      | Abund | Formula                                                         | Tgt Mass  | Diff (ppm) |
|------------------------------------------------------------------------|-------|-----------|-------|-----------------------------------------------------------------|-----------|------------|
| Cpd 1: C <sub>26</sub> H <sub>29</sub> N <sub>7</sub> O <sub>2</sub> S | 0.453 | 503.21001 | 42706 | C <sub>26</sub> H <sub>29</sub> N <sub>7</sub> O <sub>2</sub> S | 503.21034 | -0.66      |

| Compound Label                                                         | RT    | Algorithm       | Mass      |
|------------------------------------------------------------------------|-------|-----------------|-----------|
| Cpd 1: C <sub>26</sub> H <sub>29</sub> N <sub>7</sub> O <sub>2</sub> S | 0.453 | Find By Formula | 503.21001 |

MS Zoomed Spectrum

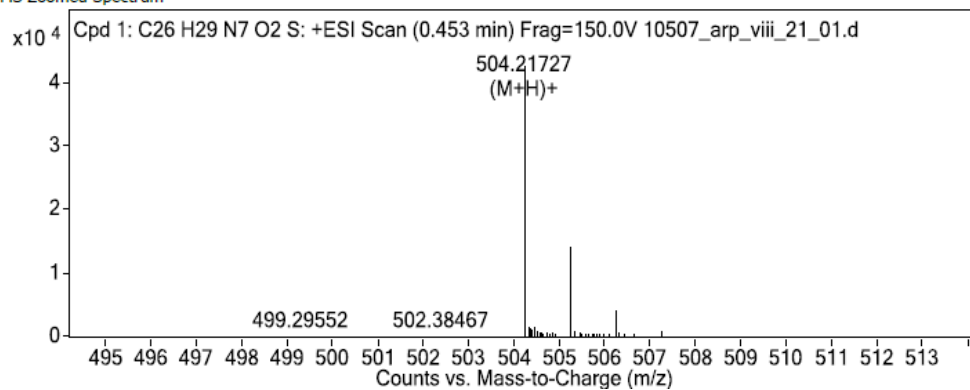

## Compound 12o

Compound Table

| Compound Label         | RT    | Mass      | Abund | Formula         | Tgt Mass  | Diff (ppm) |
|------------------------|-------|-----------|-------|-----------------|-----------|------------|
| Cpd 1: C27 H31 N7 O2 S | 0.424 | 517.22564 | 72217 | C27 H31 N7 O2 S | 517.22599 | -0.69      |

| Compound Label         | RT    | Algorithm       | Mass      |
|------------------------|-------|-----------------|-----------|
| Cpd 1: C27 H31 N7 O2 S | 0.424 | Find By Formula | 517.22564 |

MS Zoomed Spectrum

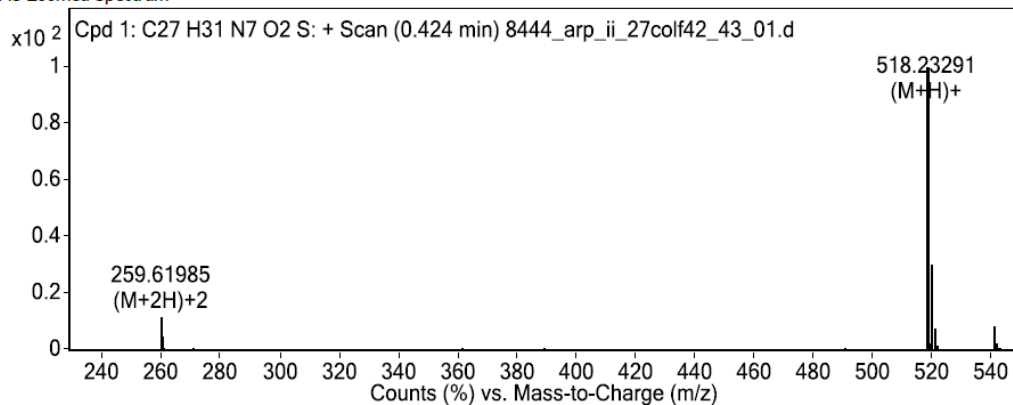

## Compound 12p

Compound Table

| Compound Label         | RT    | Mass      | Abund | Formula         | Tgt Mass  | Diff (ppm) |
|------------------------|-------|-----------|-------|-----------------|-----------|------------|
| Cpd 1: C29 H35 N7 O2 S | 0.281 | 545.25731 | 14840 | C29 H35 N7 O2 S | 545.25729 | 0.03       |

| Compound Label         | RT    | Algorithm       | Mass      |
|------------------------|-------|-----------------|-----------|
| Cpd 1: C29 H35 N7 O2 S | 0.281 | Find By Formula | 545.25731 |

MS Zoomed Spectrum

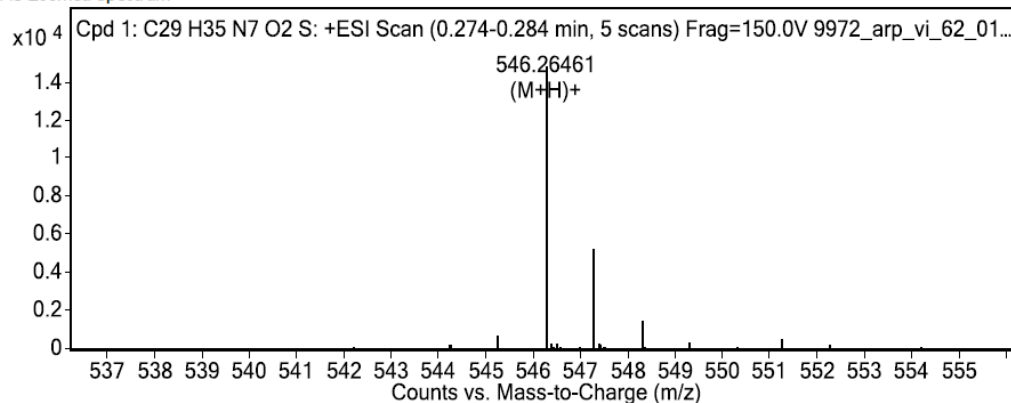

## Compound 12q

Compound Table

| Compound Label         | RT    | Mass      | Abund | Formula         | Tgt Mass  | Diff (ppm) |
|------------------------|-------|-----------|-------|-----------------|-----------|------------|
| Cpd 1: C31 H38 N8 O2 S | 2.504 | 586.28595 | 36347 | C31 H38 N8 O2 S | 586.28384 | 3.6        |

| Compound Label         | RT    | Algorithm       | Mass      |
|------------------------|-------|-----------------|-----------|
| Cpd 1: C31 H38 N8 O2 S | 2.504 | Find By Formula | 586.28595 |

MS Zoomed Spectrum

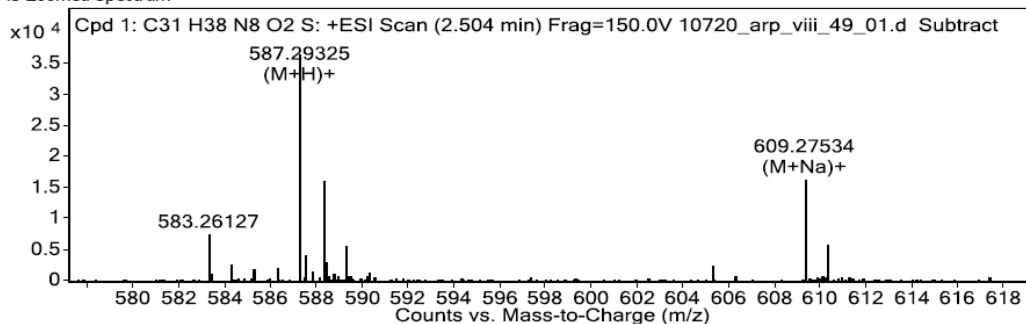

## Compound 12r

Compound Table

| Compound Label         | RT    | Mass      | Abund | Formula         | Tgt Mass  | Diff (ppm) |
|------------------------|-------|-----------|-------|-----------------|-----------|------------|
| Cpd 1: C31 H38 N7 O3 S | 0.261 | 588.27651 | 15645 | C31 H38 N7 O3 S | 588.27568 | 1.4        |

| Compound Label         | RT    | Algorithm       | Mass      |
|------------------------|-------|-----------------|-----------|
| Cpd 1: C31 H38 N7 O3 S | 0.261 | Find By Formula | 588.27651 |

MS Zoomed Spectrum

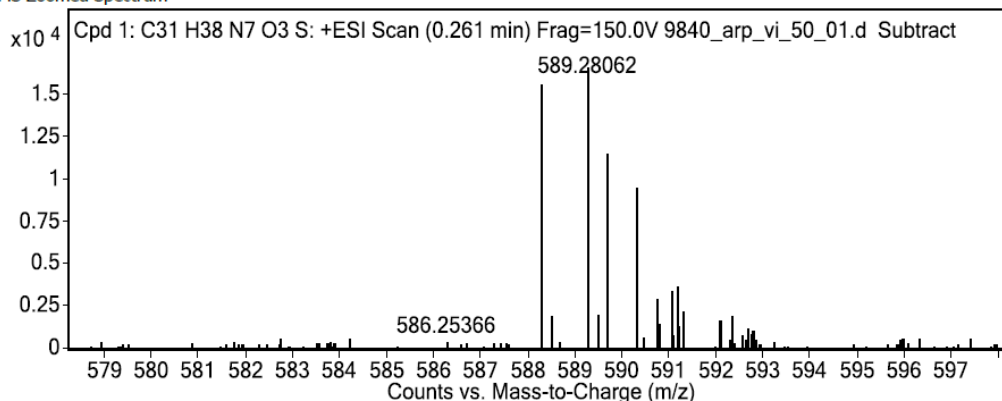



## Compound 12s

Compound Table

| Compound Label         | RT    | Mass      | Abund | Formula         | Tgt Mass  | Diff (ppm) |
|------------------------|-------|-----------|-------|-----------------|-----------|------------|
| Cpd 1: C34 H35 N7 O3 S | 0.277 | 621.25172 | 44950 | C34 H35 N7 O3 S | 621.25221 | -0.78      |

| Compound Label         | RT    | Algorithm       | Mass      |
|------------------------|-------|-----------------|-----------|
| Cpd 1: C34 H35 N7 O3 S | 0.277 | Find By Formula | 621.25172 |

MS Zoomed Spectrum

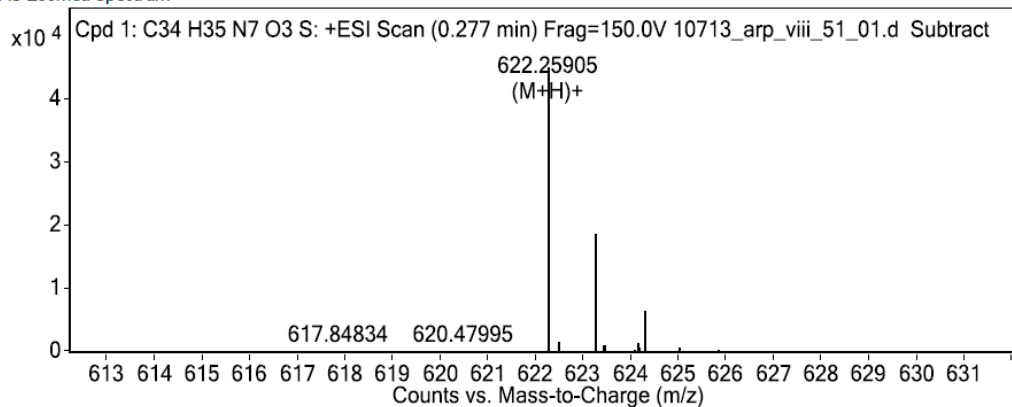

## Truncated compound 13

Compound Table

| Compound Label            | RT    | Mass      | Abund | Formula            | Tgt Mass  | Diff (ppm) |
|---------------------------|-------|-----------|-------|--------------------|-----------|------------|
| Cpd 1: C22 H22 Br O2 N3 S | 0.522 | 471.06223 | 68514 | C22 H22 Br O2 N3 S | 471.06161 | 1.32       |

| Compound Label            | RT    | Algorithm       | Mass      |
|---------------------------|-------|-----------------|-----------|
| Cpd 1: C22 H22 Br O2 N3 S | 0.522 | Find By Formula | 471.06223 |

MS Zoomed Spectrum

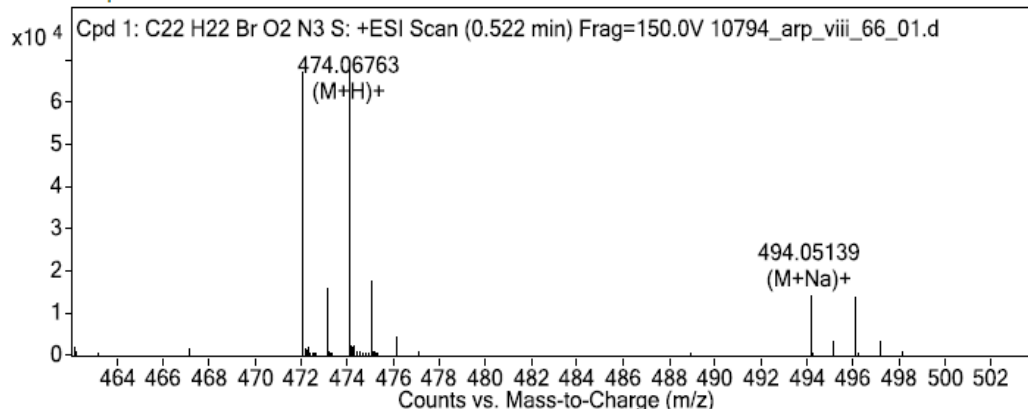

## Truncated compound 14

Compound Table

| Compound Label       | RT    | Mass      | Abund  | Formula       | Tgt Mass  | Diff (ppm) |
|----------------------|-------|-----------|--------|---------------|-----------|------------|
| Cpd 1: C18 H23 N7 O2 | 0.446 | 369.19035 | 127100 | C18 H23 N7 O2 | 369.19132 | -2.65      |

| Compound Label       | RT    | Algorithm       | Mass      |
|----------------------|-------|-----------------|-----------|
| Cpd 1: C18 H23 N7 O2 | 0.446 | Find By Formula | 369.19035 |

MS Zoomed Spectrum

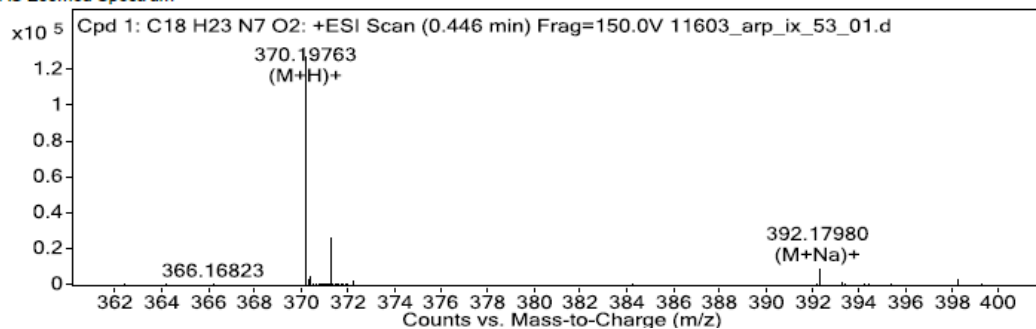

## Compound 19a

Compound Table

| Compound Label         | RT    | Mass    | Abund  | Formula         | Tgt Mass  | Diff (ppm) |
|------------------------|-------|---------|--------|-----------------|-----------|------------|
| Cpd 1: C32 H33 N7 O2 S | 0.264 | 579.242 | 133083 | C32 H33 N7 O2 S | 579.24164 | 0.61       |

| Compound Label         | RT    | Algorithm       | Mass    |
|------------------------|-------|-----------------|---------|
| Cpd 1: C32 H33 N7 O2 S | 0.264 | Find By Formula | 579.242 |

MS Zoomed Spectrum

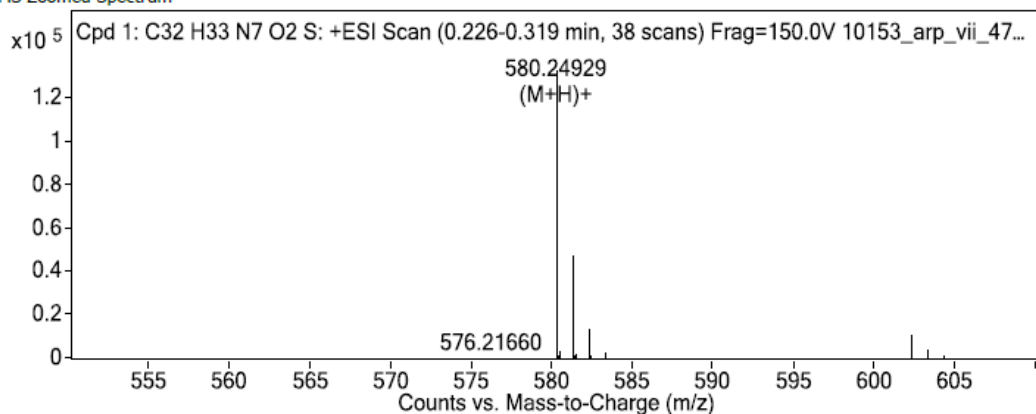

## Compound 19b

Compound Table

| Compound Label         | RT    | Mass      | Abund | Formula         | Tgt Mass  | Diff (ppm) |
|------------------------|-------|-----------|-------|-----------------|-----------|------------|
| Cpd 1: C38 H37 N7 O2 S | 0.911 | 655.27482 | 25574 | C38 H37 N7 O2 S | 655.27294 | 2.87       |

| Compound Label         | RT    | Algorithm       | Mass      |
|------------------------|-------|-----------------|-----------|
| Cpd 1: C38 H37 N7 O2 S | 0.911 | Find By Formula | 655.27482 |

MS Zoomed Spectrum

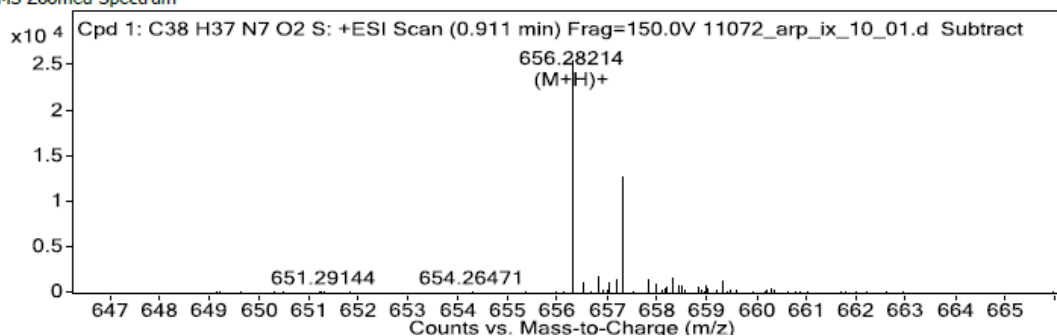

## Compound 19c

Compound Table

| Compound Label         | RT    | Mass      | Abund  | Formula         | Tgt Mass  | Diff (ppm) |
|------------------------|-------|-----------|--------|-----------------|-----------|------------|
| Cpd 1: C38 H37 N7 O3 S | 1.803 | 671.26731 | 189537 | C38 H37 N7 O3 S | 671.26786 | -0.81      |

| Compound Label         | RT    | Algorithm       | Mass      |
|------------------------|-------|-----------------|-----------|
| Cpd 1: C38 H37 N7 O3 S | 1.803 | Find By Formula | 671.26731 |

MS Zoomed Spectrum

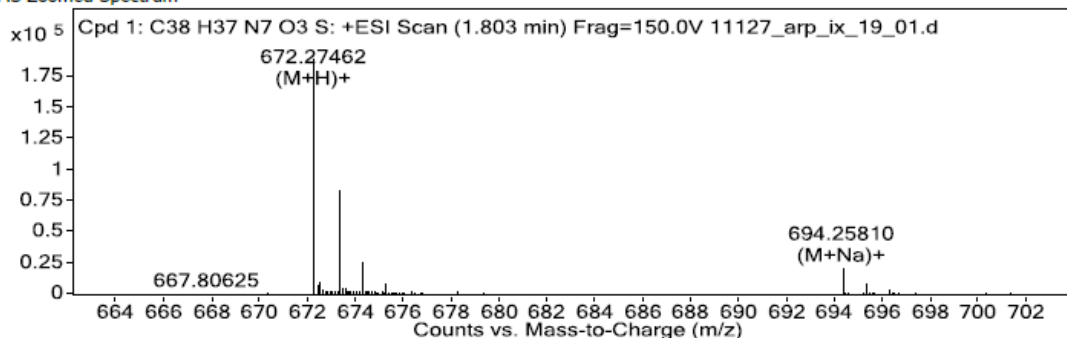

## Compound 19d

Compound Table

| Compound Label         | RT    | Mass      | Abund | Formula         | Tgt Mass  | Diff (ppm) |
|------------------------|-------|-----------|-------|-----------------|-----------|------------|
| Cpd 1: C40 H41 N7 O2 S | 1.125 | 683.30497 | 49936 | C40 H41 N7 O2 S | 683.30424 | 1.06       |

| Compound Label         | RT    | Algorithm       | Mass      |
|------------------------|-------|-----------------|-----------|
| Cpd 1: C40 H41 N7 O2 S | 1.125 | Find By Formula | 683.30497 |

MS Zoomed Spectrum

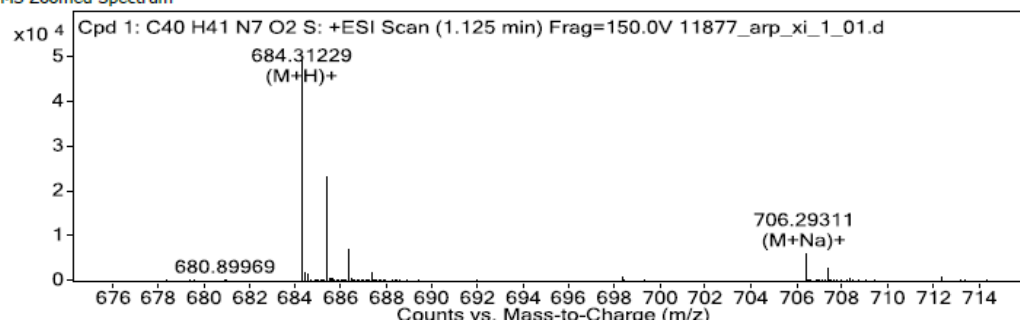

## Compound 19e

Compound Table

| Compound Label         | RT    | Mass      | Abund | Formula         | Tgt Mass  | Diff (ppm) |
|------------------------|-------|-----------|-------|-----------------|-----------|------------|
| Cpd 1: C40 H41 N7 O3 S | 1.534 | 699.29928 | 80554 | C40 H41 N7 O3 S | 699.29916 | 0.17       |

| Compound Label         | RT    | Algorithm       | Mass      |
|------------------------|-------|-----------------|-----------|
| Cpd 1: C40 H41 N7 O3 S | 1.534 | Find By Formula | 699.29928 |

MS Zoomed Spectrum

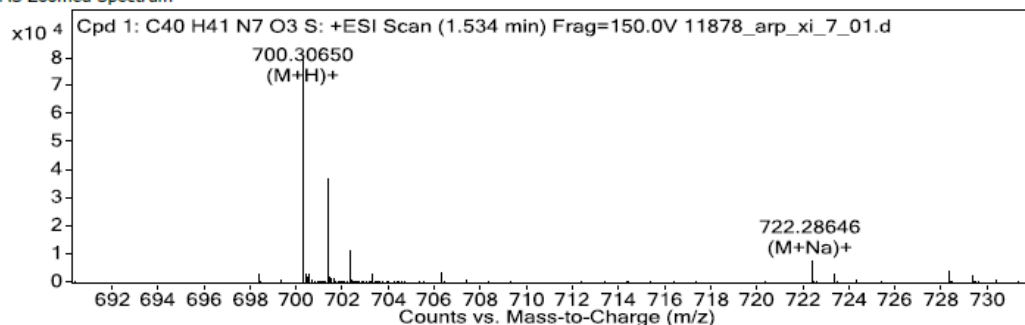

## Symmetrical compound 22

### Compound Table

| Compound Label                                                                       | RT    | Mass      | Abund | Formula                                                                       | Tgt Mass  | Diff (ppm) |
|--------------------------------------------------------------------------------------|-------|-----------|-------|-------------------------------------------------------------------------------|-----------|------------|
| Cpd 1: C <sub>46</sub> H <sub>52</sub> N <sub>14</sub> O <sub>4</sub> S <sub>2</sub> | 0.244 | 928.37399 | 966   | C <sub>46</sub> H <sub>52</sub> N <sub>14</sub> O <sub>4</sub> S <sub>2</sub> | 928.37374 | 0.27       |

| Compound Label                                                                       | RT    | Algorithm       | Mass      |
|--------------------------------------------------------------------------------------|-------|-----------------|-----------|
| Cpd 1: C <sub>46</sub> H <sub>52</sub> N <sub>14</sub> O <sub>4</sub> S <sub>2</sub> | 0.244 | Find By Formula | 928.37399 |

### MS Zoomed Spectrum

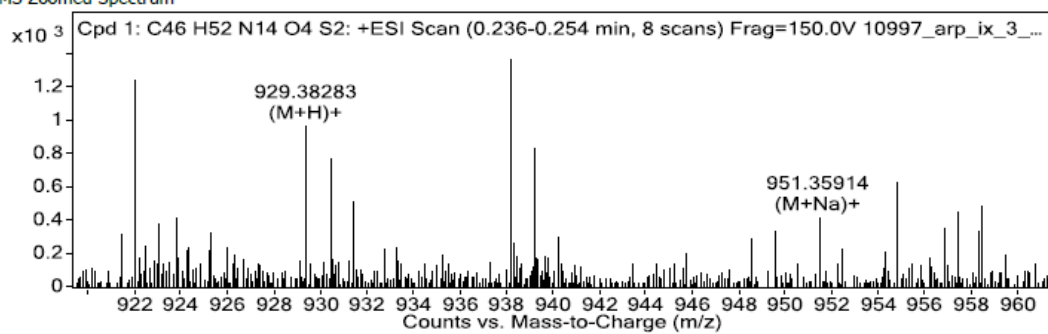

## HPLC of final compounds

### Compound 12a

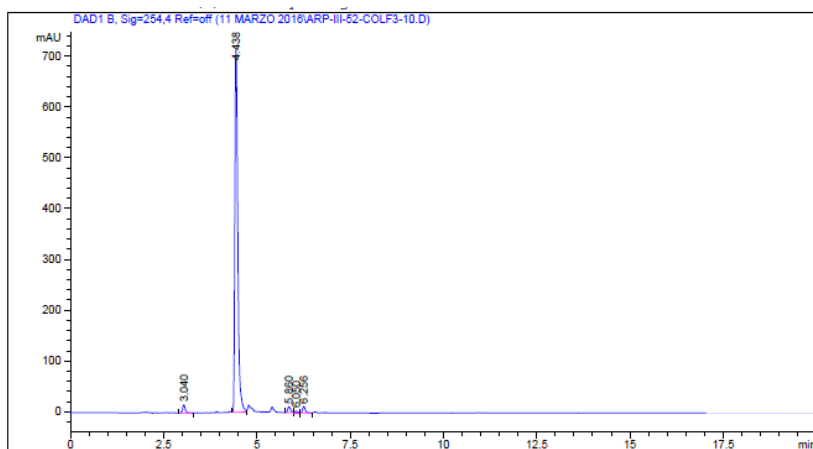

=====  
Area Percent Report  
=====

Sorted By : Signal  
Multiplier: : 1.0000  
Dilution: : 1.0000  
Use Multiplier & Dilution Factor with ISTDs

Signal 1: DAD1 B, Sig=254,4 Ref=off

| Peak # | RetTime [min] | Type | Width [min] | Area [mAU*s] | Height [mAU] | Area %  |
|--------|---------------|------|-------------|--------------|--------------|---------|
| 1      | 3.040         | BB   | 0.0716      | 75.67520     | 15.88087     | 1.8289  |
| 2      | 4.438         | VV   | 0.0860      | 3921.46582   | 714.60071    | 94.7730 |
| 3      | 5.860         | BV   | 0.0874      | 65.00219     | 11.60204     | 1.5710  |
| 4      | 6.050         | VB   | 0.0716      | 14.37953     | 3.01937      | 0.3475  |
| 5      | 6.256         | BV   | 0.0727      | 61.22287     | 12.60440     | 1.4796  |

### Compound 12b

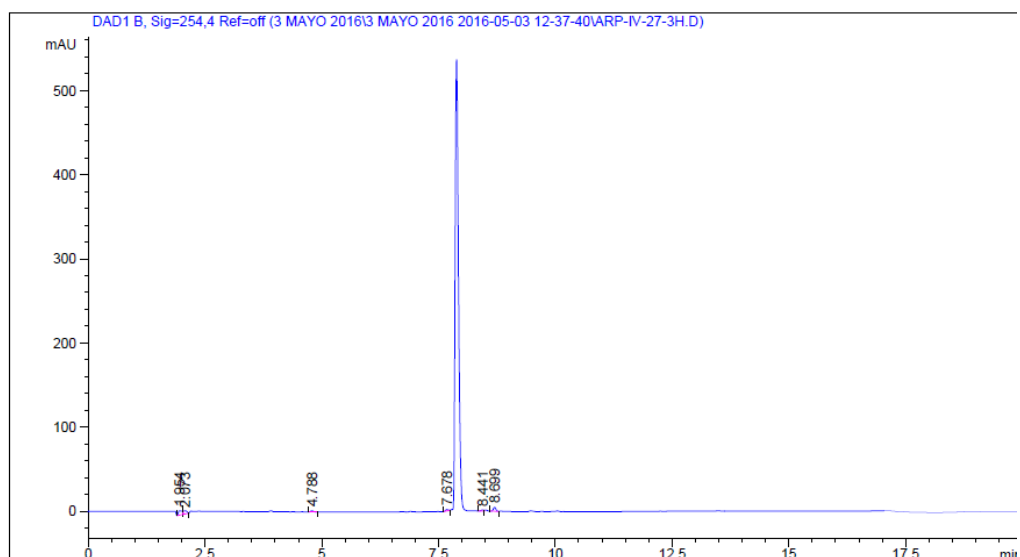

=====  
Area Percent Report  
=====

Sorted By : Signal  
Multiplier: : 1.0000  
Dilution: : 1.0000

## Compound 12c

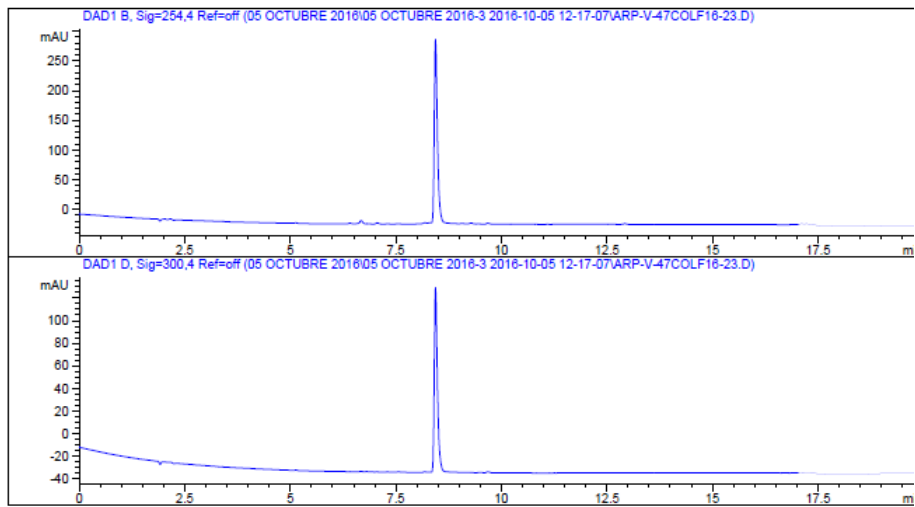

```

=====
                          Area Percent Report
=====

Sorted By      :      Signal
Multiplier:    :      1.0000
Dilution:      :      1.0000
Use Multiplier & Dilution Factor with ISTDs
  
```

## Compound 12d

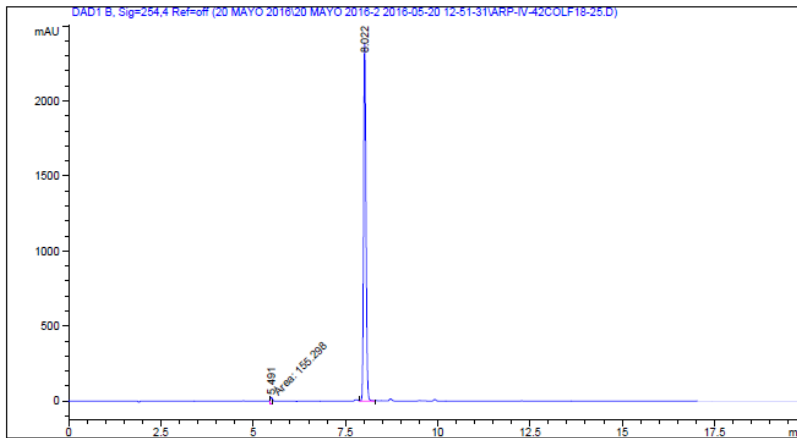

```

=====
                          Area Percent Report
=====

Sorted By      :      Signal
Multiplier:    :      1.0000
Dilution:      :      1.0000
Use Multiplier & Dilution Factor with ISTDs
  
```

Signal 1: DAD1 B, Sig=254,4 Ref=off

| Peak # | RetTime [min] | Type | Width [min] | Area [mAU*s] | Height [mAU] | Area %  |
|--------|---------------|------|-------------|--------------|--------------|---------|
| 1      | 5.491         | MM   | 0.0651      | 155.29810    | 39.76358     | 1.4191  |
| 2      | 8.022         | VV   | 0.0707      | 1.07884e4    | 2390.53101   | 98.5809 |

## Compound 12e

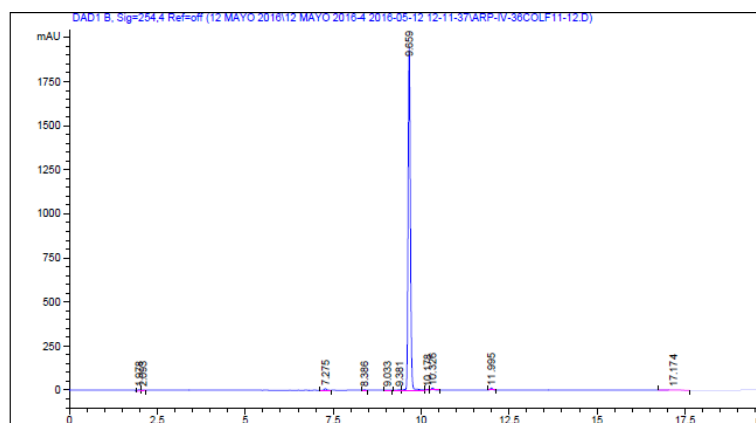

=====  
Area Percent Report  
=====

Sorted By : Signal  
Multiplier: : 1.0000  
Dilution: : 1.0000  
Use Multiplier & Dilution Factor with ISTDs

Signal 1: DAD1 B, Sig=254,4 Ref=off

| Peak # | RetTime [min] | Type | Width [min] | Area [mAU*s] | Height [mAU] | Area %  |
|--------|---------------|------|-------------|--------------|--------------|---------|
| 1      | 1.978         | BV   | 0.1014      | 45.92241     | 6.92196      | 0.5068  |
| 2      | 2.093         | VB   | 0.0863      | 27.28303     | 4.28348      | 0.3011  |
| 3      | 7.275         | BV   | 0.0651      | 35.57291     | 8.45944      | 0.3926  |
| 4      | 8.386         | BV   | 0.0638      | 9.26013      | 2.26117      | 0.1022  |
| 5      | 9.033         | BB   | 0.0684      | 6.53143      | 1.45422      | 0.0721  |
| 6      | 9.381         | BV   | 0.1092      | 17.61098     | 2.25389      | 0.1944  |
| 7      | 9.659         | VV   | 0.0705      | 8755.60840   | 1946.05225   | 96.6310 |

## Compound 12f

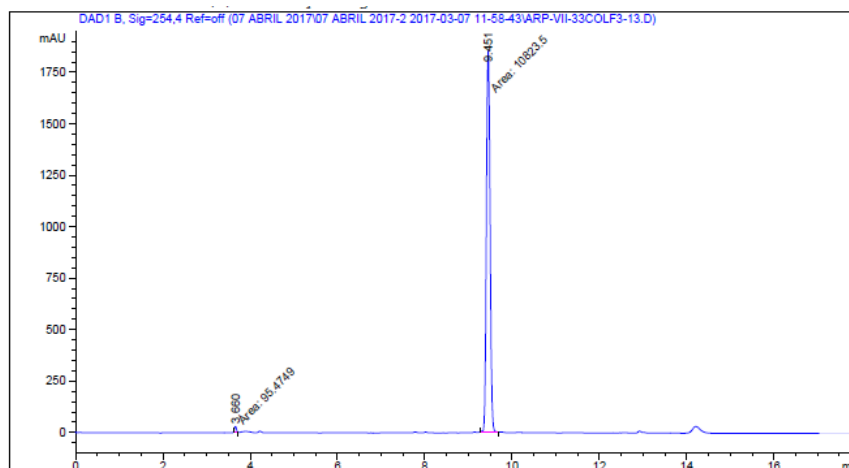

=====  
Area Percent Report  
=====

Sorted By : Signal  
Multiplier: : 1.0000  
Dilution: : 1.0000  
Use Multiplier & Dilution Factor with ISTDs

Signal 1: DAD1 B, Sig=254,4 Ref=off

| Peak # | RetTime [min] | Type | Width [min] | Area [mAU*s] | Height [mAU] | Area %  |
|--------|---------------|------|-------------|--------------|--------------|---------|
| 1      | 3.660         | MM   | 0.0537      | 95.47493     | 29.60547     | 0.8744  |
| 2      | 9.451         | MM   | 0.0973      | 1.08235e4    | 1854.82361   | 99.1256 |



## Compound 12g

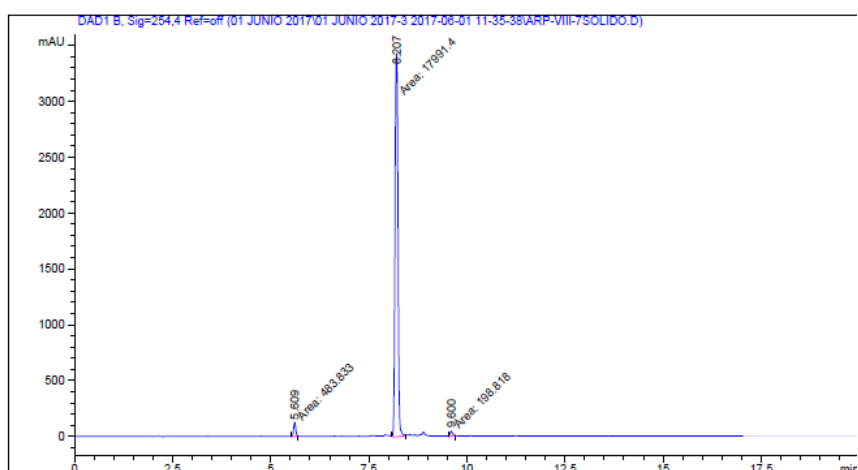

=====  
 Area Percent Report  
 =====

Sorted By : Signal  
 Multiplier: : 1.0000  
 Dilution: : 1.0000  
 Use Multiplier & Dilution Factor with ISTDs

Signal 1: DAD1 B, Sig=254,4 Ref=off

| Peak # | RetTime [min] | Type | Width [min] | Area [mAU*s] | Height [mAU] | Area %  |
|--------|---------------|------|-------------|--------------|--------------|---------|
| 1      | 5.609         | MM   | 0.0631      | 483.83289    | 127.75903    | 2.5909  |
| 2      | 8.207         | MM   | 0.0873      | 1.79914e4    | 3433.41919   | 96.3444 |
| 3      | 9.600         | MM   | 0.0719      | 198.81828    | 46.10819     | 1.0647  |

## Compound 12h

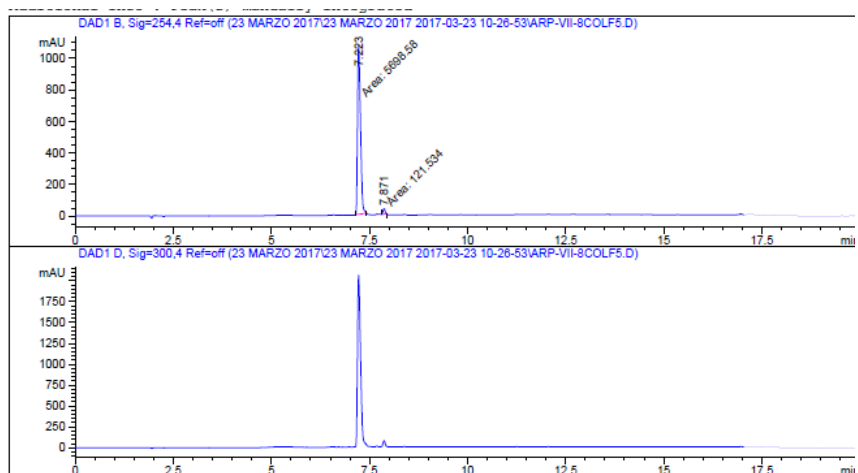

=====  
 Area Percent Report  
 =====

Sorted By : Signal  
 Multiplier: : 1.0000  
 Dilution: : 1.0000  
 Use Multiplier & Dilution Factor with ISTDs

Signal 1: DAD1 B, Sig=254,4 Ref=off

| Peak # | RetTime [min] | Type | Width [min] | Area [mAU*s] | Height [mAU] | Area %  |
|--------|---------------|------|-------------|--------------|--------------|---------|
| 1      | 7.223         | MM   | 0.0877      | 5698.57959   | 1082.70068   | 97.9118 |
| 2      | 7.871         | MM   | 0.0566      | 121.53374    | 35.79636     | 2.0882  |

## Compound 12i

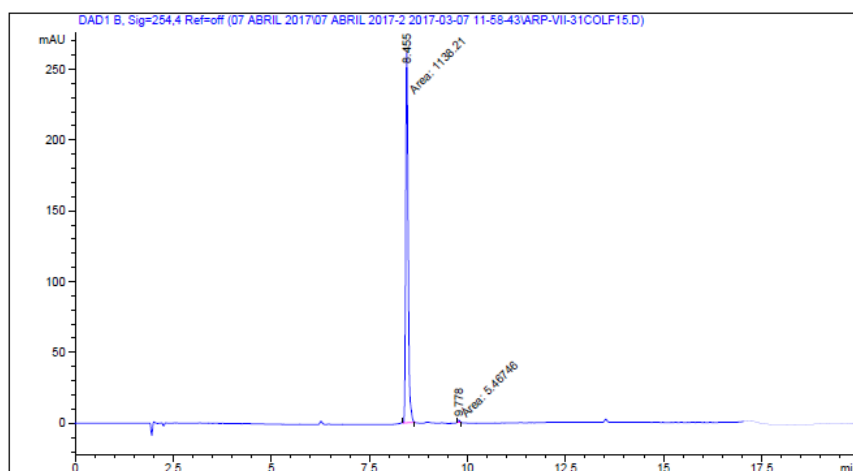

=====  
 Area Percent Report  
 =====

Sorted By : Signal  
 Multiplier: : 1.0000  
 Dilution: : 1.0000  
 Use Multiplier & Dilution Factor with ISTDs

Signal 1: DAD1 B, Sig=254,4 Ref=off

| Peak # | RetTime [min] | Type | Width [min] | Area [mAU*s] | Height [mAU] | Area %  |
|--------|---------------|------|-------------|--------------|--------------|---------|
| 1      | 8.455         | MM   | 0.0722      | 1138.21167   | 262.66385    | 99.5219 |
| 2      | 9.778         | MM   | 0.0561      | 5.46746      | 1.62535      | 0.4781  |

## Compound 12j

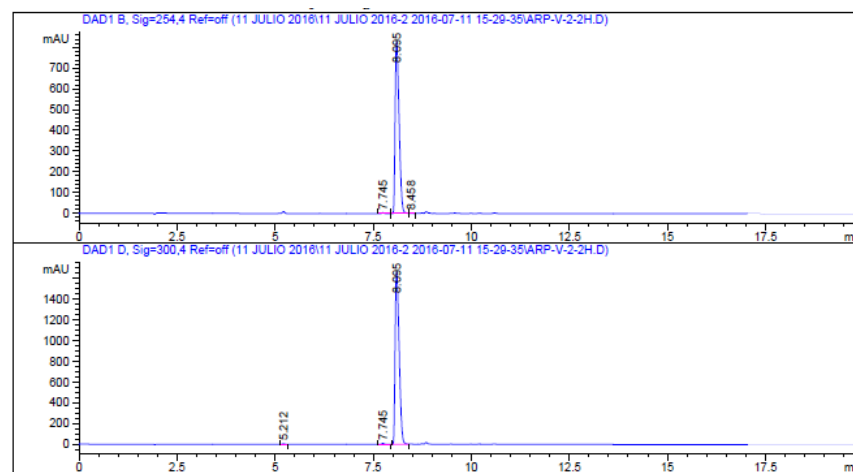

=====  
 Area Percent Report  
 =====

Sorted By : Signal  
 Multiplier: : 1.0000  
 Dilution: : 1.0000  
 Use Multiplier & Dilution Factor with ISTDs

Signal 1: DAD1 B, Sig=254,4 Ref=off

| Peak # | RetTime [min] | Type | Width [min] | Area [mAU*s] | Height [mAU] | Area %  |
|--------|---------------|------|-------------|--------------|--------------|---------|
| 1      | 7.745         | BB   | 0.0674      | 18.37225     | 4.17380      | 0.3143  |
| 2      | 8.095         | EV   | 0.1073      | 5821.30859   | 835.54053    | 99.5890 |
| 3      | 8.458         | VB   | 0.0718      | 5.65452      | 1.18208      | 0.0967  |

## Compound 12k

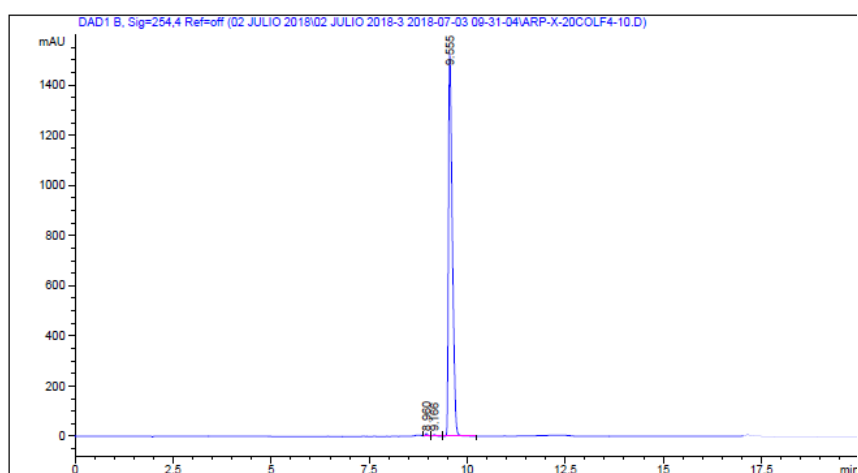

```

=====
                          Area Percent Report
=====

Sorted By      :      Signal
Multiplier:    :      1.0000
Dilution:      :      1.0000
Use Multiplier & Dilution Factor with ISTDs
  
```

Signal 1: DAD1 B, Sig=254,4 Ref=off

| Peak # | RetTime [min] | Type | Width [min] | Area [mAU*s] | Height [mAU] | Area %  |
|--------|---------------|------|-------------|--------------|--------------|---------|
| 1      | 8.960         | VV   | 0.0699      | 50.10977     | 10.46631     | 0.4763  |
| 2      | 9.166         | VB   | 0.0750      | 29.45800     | 6.03150      | 0.2800  |
| 3      | 9.555         | BB   | 0.1019      | 1.04420e4    | 1524.55652   | 99.2438 |

## Compound 12l

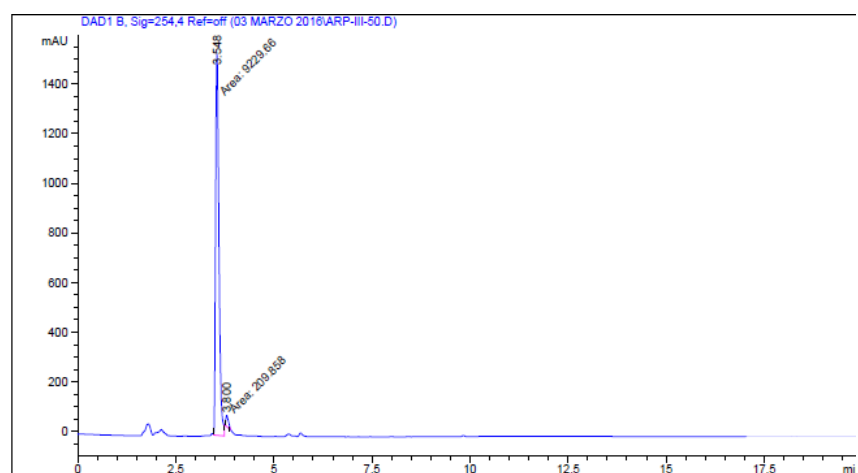

```

=====
                          Area Percent Report
=====

Sorted By      :      Signal
Multiplier:    :      1.0000
Dilution:      :      1.0000
Use Multiplier & Dilution Factor with ISTDs
  
```

Signal 1: DAD1 B, Sig=254,4 Ref=off

| Peak # | RetTime [min] | Type | Width [min] | Area [mAU*s] | Height [mAU] | Area %  |
|--------|---------------|------|-------------|--------------|--------------|---------|
| 1      | 3.548         | MM   | 0.0999      | 9229.65918   | 1539.14612   | 97.7768 |
| 2      | 3.800         | MM   | 0.0787      | 209.85815    | 44.45146     | 2.2232  |

## Compound 12m

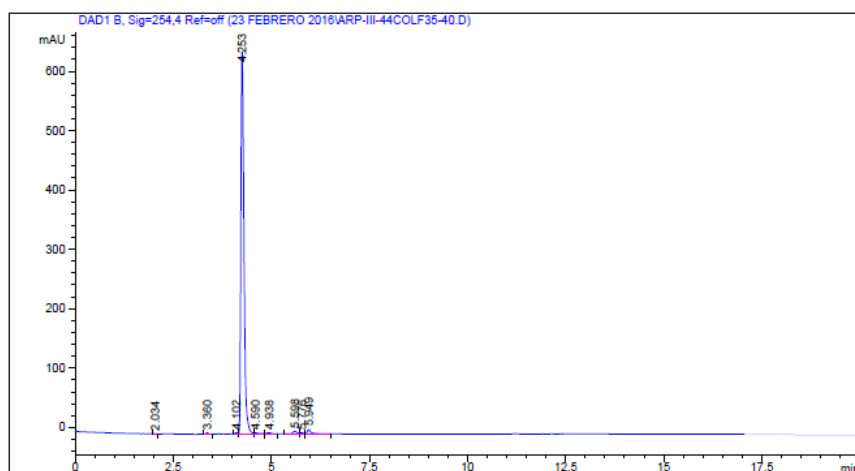

=====  
 Area Percent Report  
 =====

Sorted By : Signal  
 Multiplier: : 1.0000  
 Dilution: : 1.0000  
 Use Multiplier & Dilution Factor with ISTDs

Signal 1: DAD1 B, Sig=254,4 Ref=off

| Peak # | RetTime [min] | Type | Width [min] | Area [mAU*s] | Height [mAU] | Area %  |
|--------|---------------|------|-------------|--------------|--------------|---------|
| 1      | 2.034         | VB   | 0.0835      | 8.47808      | 1.55815      | 0.2304  |
| 2      | 3.360         | BB   | 0.0620      | 10.98859     | 2.66981      | 0.2986  |
| 3      | 4.102         | BV   | 0.0662      | 8.66213      | 1.93698      | 0.2354  |
| 4      | 4.253         | VV   | 0.0858      | 3520.85449   | 643.70288    | 95.6801 |

## Compound 12n

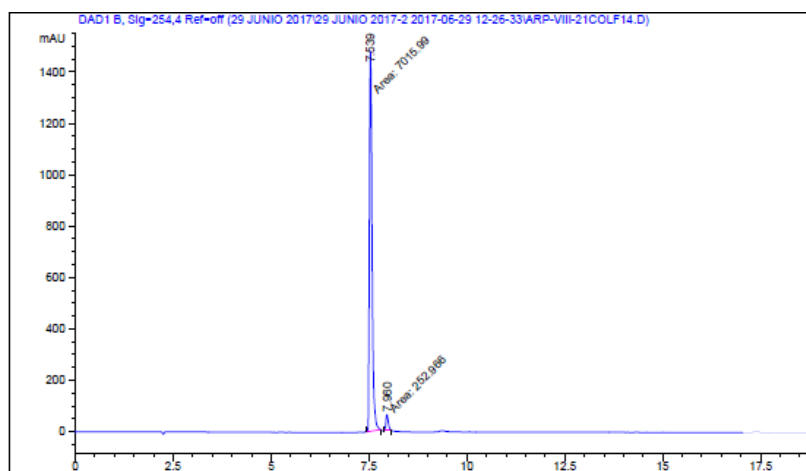

=====  
 Area Percent Report  
 =====

Sorted By : Signal  
 Multiplier: : 1.0000  
 Dilution: : 1.0000  
 Use Multiplier & Dilution Factor with ISTDs

Signal 1: DAD1 B, Sig=254,4 Ref=off

| Peak # | RetTime [min] | Type | Width [min] | Area [mAU*s] | Height [mAU] | Area %  |
|--------|---------------|------|-------------|--------------|--------------|---------|
| 1      | 7.539         | MM   | 0.0789      | 7015.99219   | 1481.90625   | 96.5199 |
| 2      | 7.960         | MM   | 0.0693      | 252.96605    | 60.79996     | 3.4801  |

## Compound 12o

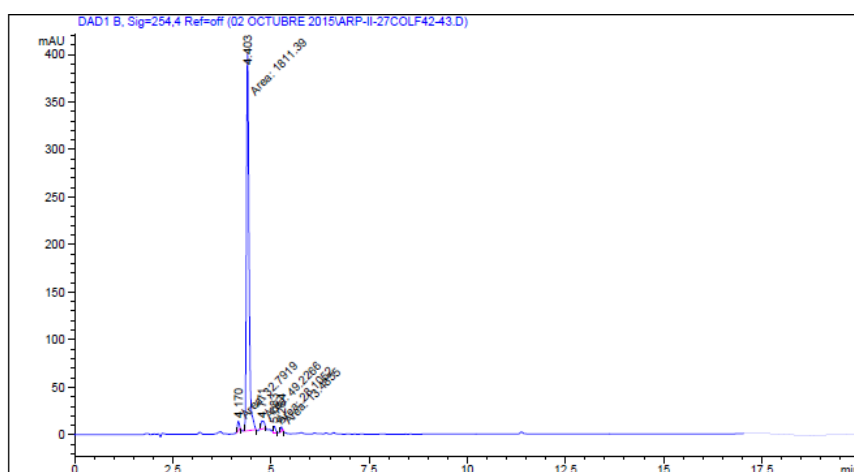

```

=====
                        Area Percent Report
=====
Sorted By           :      Signal
Multiplier:         :      1.0000
Dilution:           :      1.0000
Use Multiplier & Dilution Factor with ISTDs
  
```

Signal 1: DAD1 B, Sig=254,4 Ref=off

| Peak # | RetTime [min] | Type | Width [min] | Area [mAU*s] | Height [mAU] | Area %  |
|--------|---------------|------|-------------|--------------|--------------|---------|
| 1      | 4.170         | MM   | 0.0531      | 32.79185     | 10.29895     | 1.6947  |
| 2      | 4.403         | MM   | 0.0756      | 1811.39087   | 399.45956    | 93.6119 |

## Compound 12p

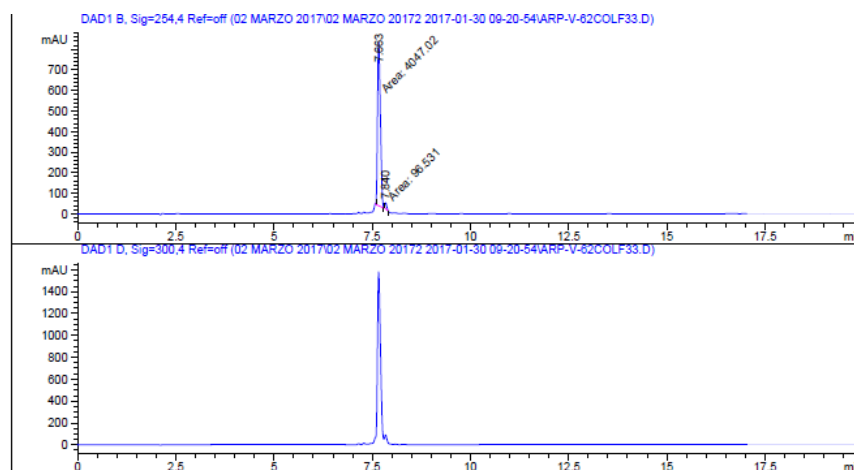

```

=====
                        Area Percent Report
=====
Sorted By           :      Signal
Multiplier:         :      1.0000
Dilution:           :      1.0000
Use Multiplier & Dilution Factor with ISTDs
  
```

Signal 1: DAD1 B, Sig=254,4 Ref=off

| Peak # | RetTime [min] | Type | Width [min] | Area [mAU*s] | Height [mAU] | Area %  |
|--------|---------------|------|-------------|--------------|--------------|---------|
| 1      | 7.663         | MM   | 0.0839      | 4047.01660   | 803.92444    | 97.6703 |
| 2      | 7.840         | MM   | 0.0565      | 96.53104     | 28.46407     | 2.3297  |

## Compound 12q

Method Set F035\_MS\_G2\_30\_t10  
 Injection Volume 2.00 ul  
 Vial 4  
 Flow: 1 ml/min  
 Run Time 18.00 Minutes

Sample Set Name 18\_09\_2017  
 Date Acquired 9/18/17 12:52:47 PM  
 Channel Description PDA MaxPlot (230.0 nm to 400.0 nm)  
 Column: SunFire C18 3.5um (4.6x 50 mm)

Auto-Scaled Chromatogram

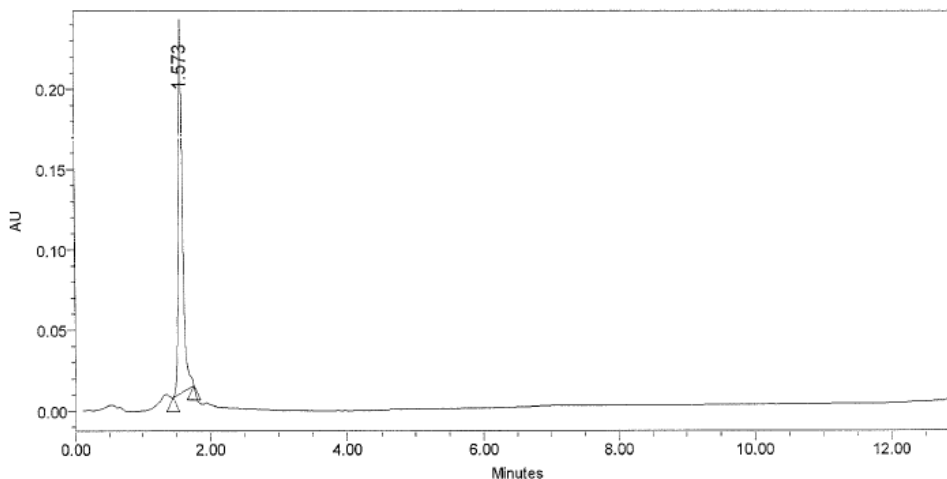

Peak Results

|   | RT    | % Area |
|---|-------|--------|
| 1 | 1.573 | 100.00 |

## Compound 12r

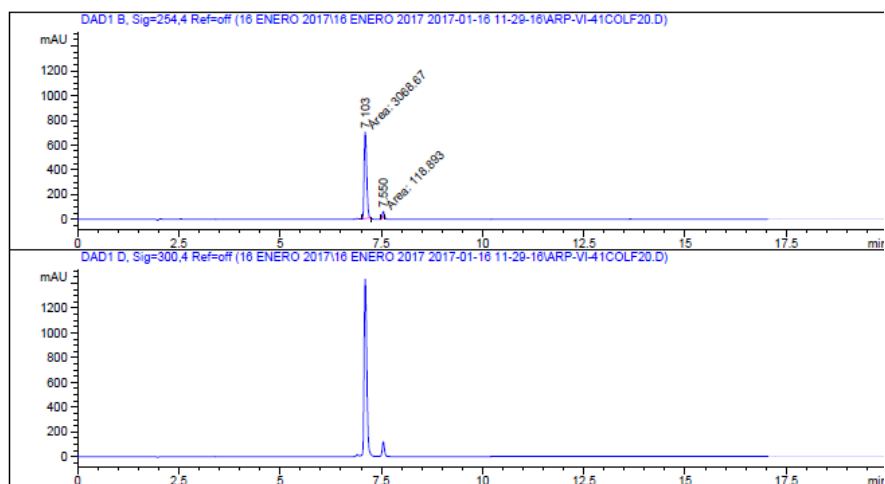

Area Percent Report

Sorted By : Signal  
 Multiplier: : 1.0000  
 Dilution: : 1.0000  
 Use Multiplier & Dilution Factor with ISTDs

Signal 1: DAD1 B, Sig=254,4 Ref=off

| Peak # | RetTime [min] | Type | Width [min] | Area [mAU*s] | Height [mAU] | Area %  |
|--------|---------------|------|-------------|--------------|--------------|---------|
| 1      | 7.103         | MM   | 0.0726      | 3068.66968   | 704.58185    | 96.2701 |
| 2      | 7.550         | MM   | 0.0458      | 118.89349    | 43.22698     | 3.7299  |

## Compound 12s

Method Set F035\_MS\_G10\_95\_t10  
 Injection Volume 10.00 ul  
 Vial 7  
 Flow: 1 ml/min  
 Run Time 18.00 Minutes

Sample Set Name 19\_09\_2017  
 Date Acquired 9/19/17 12:47:15 PM  
 Channel Description PDA MaxPlot (230.0 nm to 400.0 nm)  
 Column: SunFire C18 3.5um (4.6x 50 mm)

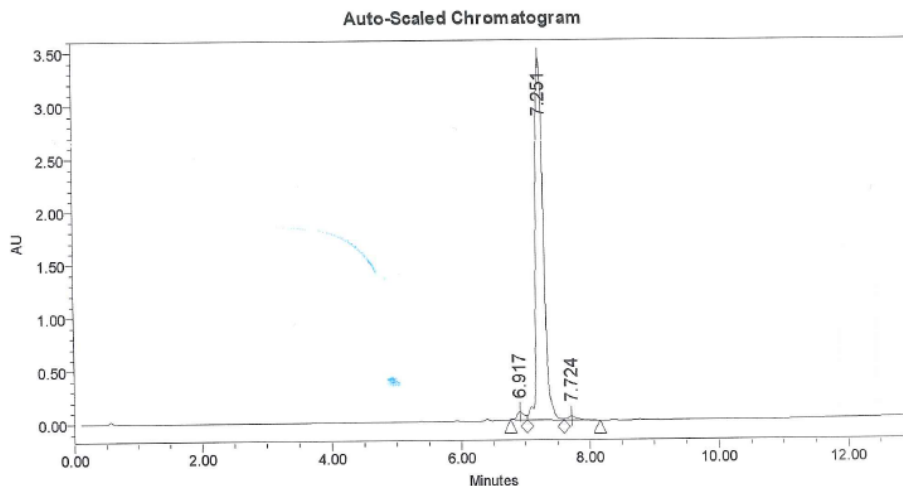

### Peak Results

|   | RT    | % Area |
|---|-------|--------|
| 1 | 6.917 | 1.90   |
| 2 | 7.251 | 96.91  |
| 3 | 7.724 | 1.19   |

## Truncated compound 13

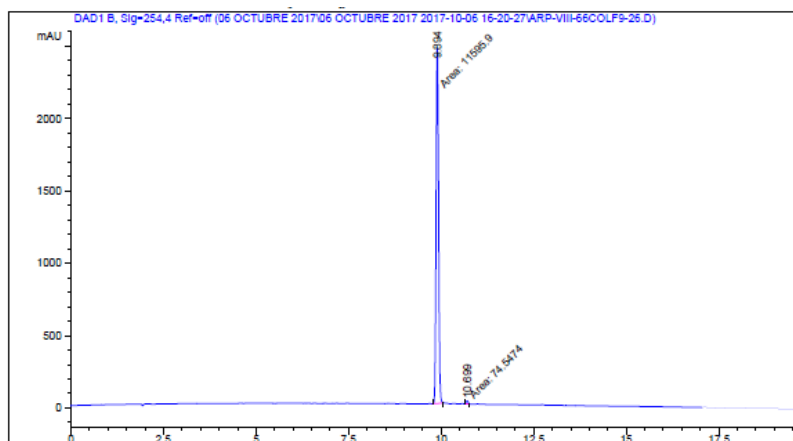

### Area Percent Report

Sorted By : Signal  
 Multiplier: : 1.0000  
 Dilution: : 1.0000  
 Use Multiplier & Dilution Factor with ISTDs

Signal 1: DAD1 B, Sig=254,4 Ref-off

| Peak # | RetTime [min] | Type | Width [min] | Area [mAU*s] | Height [mAU] | Area %  |
|--------|---------------|------|-------------|--------------|--------------|---------|
| 1      | 9.894         | MM   | 0.0787      | 1.15959e4    | 2455.72168   | 99.3612 |
| 2      | 10.699        | MM   | 0.0622      | 74.54743     | 19.96870     | 0.6388  |

## Truncated compound 14

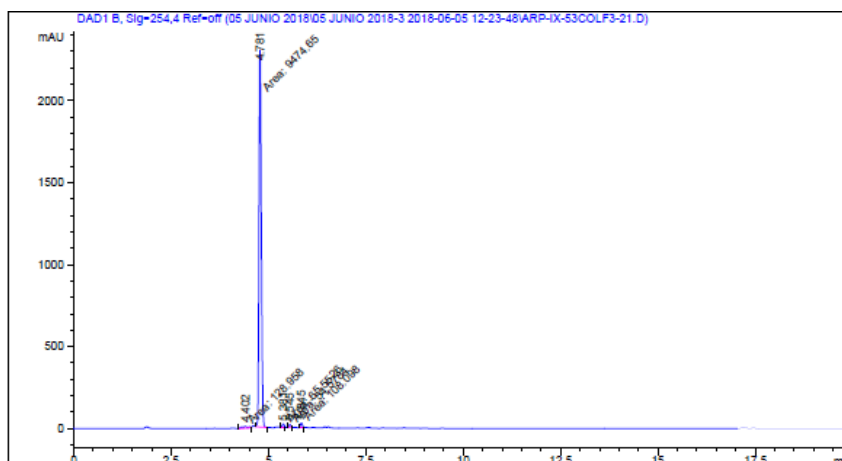

### Area Percent Report

Sorted By : Signal  
Multiplier: : 1.0000  
Dilution: : 1.0000  
Use Multiplier & Dilution Factor with ISTDs

Signal 1: DAD1 B, Sig-254,4 Ref-off

| Peak # | RetTime [min] | Type | Width [min] | Area [mAU*s] | Height [mAU] | Area %  |
|--------|---------------|------|-------------|--------------|--------------|---------|
| 1      | 4.402         | MM   | 0.1770      | 128.95772    | 12.14579     | 1.3116  |
| 2      | 4.781         | MM   | 0.0684      | 9474.64648   | 2307.45044   | 96.3670 |
| 3      | 5.381         | MM   | 0.0551      | 65.55256     | 19.83049     | 0.6667  |
| 4      | 5.545         | MM   | 0.0562      | 54.57840     | 16.18933     | 0.5551  |
| 5      | 5.845         | MM   | 0.0615      | 108.09762    | 29.29767     | 1.0995  |

## Compound 19a

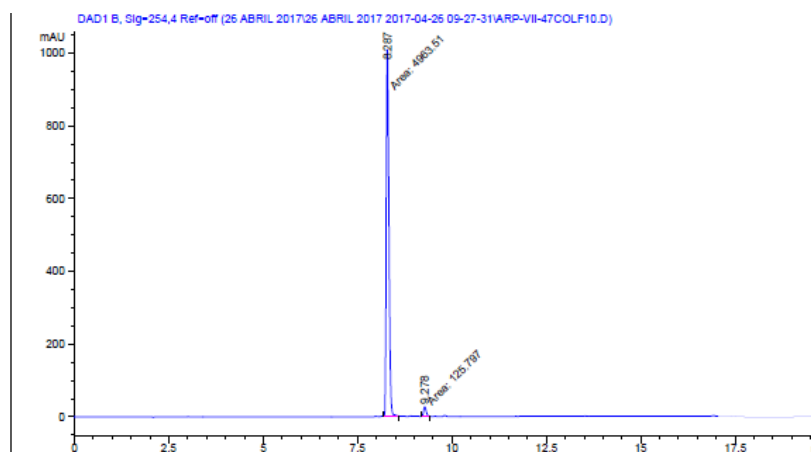

### Area Percent Report

Sorted By : Signal  
Multiplier: : 1.0000  
Dilution: : 1.0000  
Use Multiplier & Dilution Factor with ISTDs

Signal 1: DAD1 B, Sig-254,4 Ref-off

| Peak # | RetTime [min] | Type | Width [min] | Area [mAU*s] | Height [mAU] | Area %  |
|--------|---------------|------|-------------|--------------|--------------|---------|
| 1      | 8.287         | MM   | 0.0819      | 4963.51465   | 1009.98993   | 97.5282 |
| 2      | 9.278         | MM   | 0.0792      | 125.79665    | 26.47345     | 2.4718  |



## Compound 19b

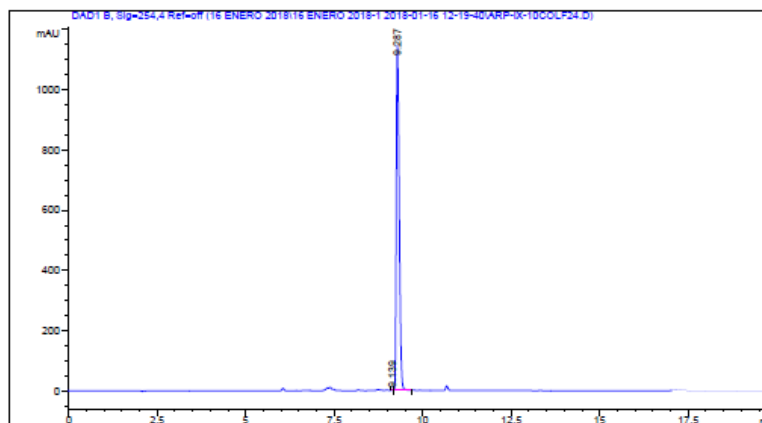

### Area Percent Report

Sorted By : Signal  
Multiplier: : 1.0000  
Dilution: : 1.0000  
Use Multiplier & Dilution Factor with ISTDs

Signal 1: DAD1 B, Sig=254,4 Ref-off

| Peak # | RetTime [min] | Type | Width [min] | Area [mAU*s] | Height [mAU] | Area %  |
|--------|---------------|------|-------------|--------------|--------------|---------|
| 1      | 9.139         | BV   | 0.0593      | 5.19366      | 1.33868      | 0.0775  |
| 2      | 9.287         | VV   | 0.0922      | 6695.38770   | 1146.08337   | 99.9225 |

## Compound 19c

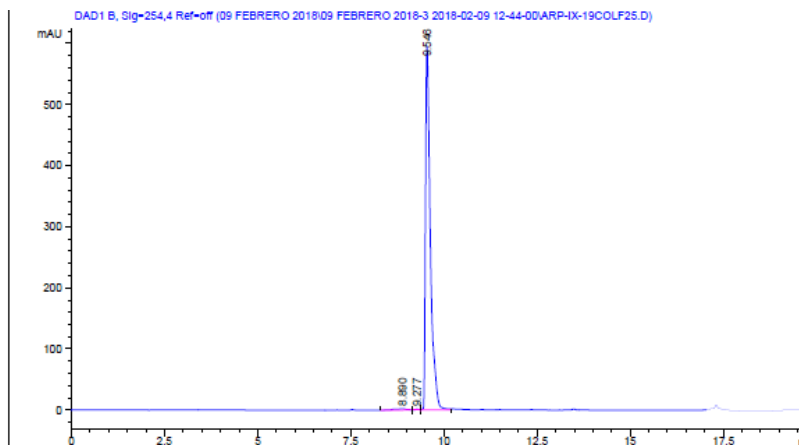

### Area Percent Report

Sorted By : Signal  
Multiplier: : 1.0000  
Dilution: : 1.0000  
Use Multiplier & Dilution Factor with ISTDs

Signal 1: DAD1 B, Sig=254,4 Ref-off

| Peak # | RetTime [min] | Type | Width [min] | Area [mAU*s] | Height [mAU] | Area %  |
|--------|---------------|------|-------------|--------------|--------------|---------|
| 1      | 8.890         | BB   | 0.2872      | 45.34130     | 2.08939      | 0.8287  |
| 2      | 9.277         | BV   | 0.0848      | 6.47058      | 1.16539      | 0.1183  |
| 3      | 9.546         | VV   | 0.1343      | 5419.44727   | 595.07318    | 99.0530 |

## Compound 19c

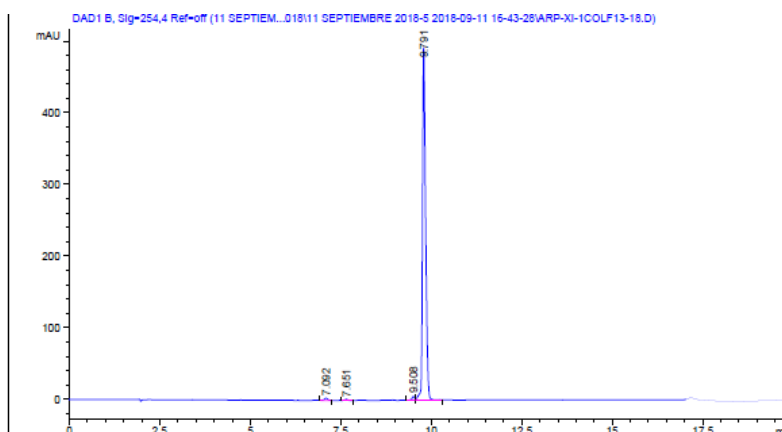

### Area Percent Report

Sorted By : Signal  
Multiplier: : 1.0000  
Dilution: : 1.0000  
Use Multiplier & Dilution Factor with ISTDs

Signal 1: DAD1 B, Sig-254,4 Ref-off

| Peak # | RetTime [min] | Type | Width [min] | Area [mAU*s] | Height [mAU] | Area %  |
|--------|---------------|------|-------------|--------------|--------------|---------|
| 1      | 7.092         | BB   | 0.0891      | 18.41888     | 3.11199      | 0.6108  |
| 2      | 7.651         | BB   | 0.0710      | 8.04033      | 1.70545      | 0.2666  |
| 3      | 9.508         | BV   | 0.0840      | 30.52392     | 5.39920      | 1.0123  |
| 4      | 9.791         | VB   | 0.0900      | 2958.42798   | 492.99564    | 98.1103 |

## Compound 19d

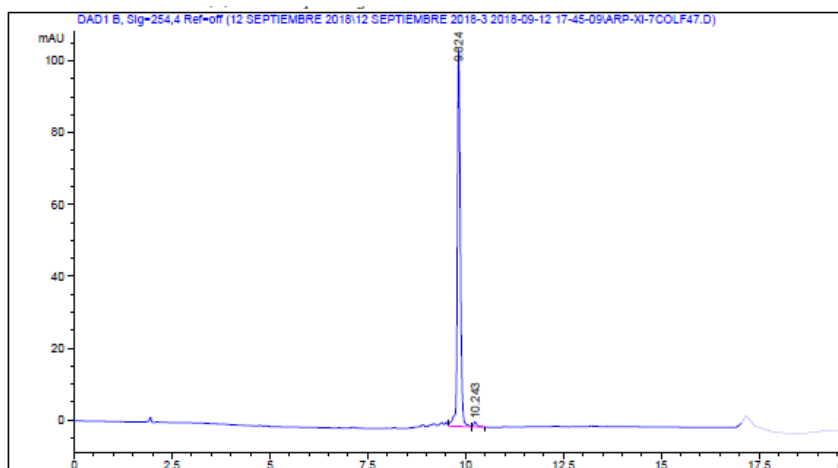

### Area Percent Report

Sorted By : Signal  
Multiplier: : 1.0000  
Dilution: : 1.0000  
Use Multiplier & Dilution Factor with ISTDs

Signal 1: DAD1 B, Sig-254,4 Ref-off

| Peak # | RetTime [min] | Type | Width [min] | Area [mAU*s] | Height [mAU] | Area %  |
|--------|---------------|------|-------------|--------------|--------------|---------|
| 1      | 9.824         | VB   | 0.0809      | 564.22882    | 104.64286    | 98.6153 |
| 2      | 10.243        | BB   | 0.0842      | 7.92274      | 1.39584      | 1.3847  |

## Symmetrical compound 22

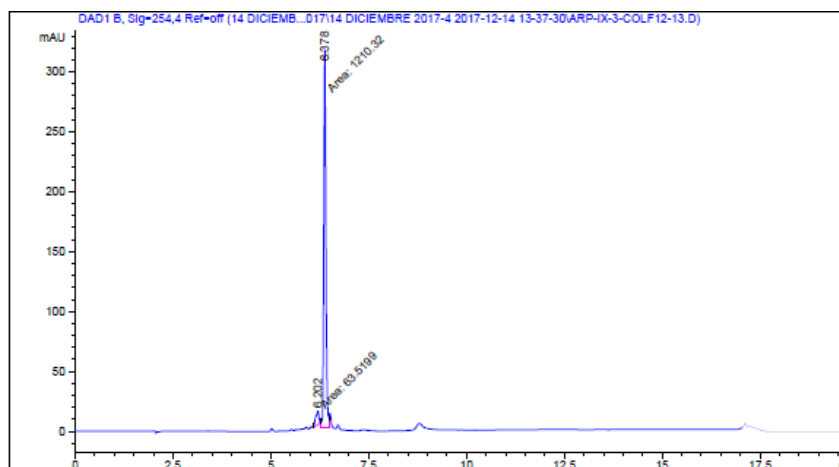

### Area Percent Report

Sorted By : Signal  
Multiplier: : 1.0000  
Dilution: : 1.0000  
Use Multiplier & Dilution Factor with ISTDs

Signal 1: DAD1 B, Sig-254,4 Ref-off

| Peak # | RetTime [min] | Type | Width [min] | Area [mAU*s] | Height [mAU] | Area %  |
|--------|---------------|------|-------------|--------------|--------------|---------|
| 1      | 6.202         | MM   | 0.0930      | 63.51986     | 11.37742     | 4.9865  |
| 2      | 6.378         | MM   | 0.0636      | 1210.32104   | 317.31894    | 95.0135 |

## REFERENCES

- (1) Revuelto, A.; Ruiz-Santaquiteria, M.; De Lucio, H.; Gamo, A.; Carriles, A. A.; Gutiérrez, K. J.; Sánchez-Murcia, P. A.; Hermoso, J. A.; Gago, F.; Camarasa, M. J.; Jiménez-Ruiz, A.; Velázquez, S. Pyrrolopyrimidine vs imidazole-phenyl-thiazole scaffolds in nonpeptidic dimerization inhibitors of *Leishmania infantum* trypanothione reductase. *ACS Infect. Dis.* **2019**, *5*, 873-891.
- (2) Leskovac, V. *Comprehensive enzyme kinetics*; Kluwer Academic/Plenum Publishers: New York, 2003.
- (3) Copeland, R. A. *Enzymes: A practical introduction to structure, mechanism, and data analysis*; 2nd ed.; John Wiley & Sons, Inc.: New York, 2000.
- (4) Copeland, R. A. *Evaluation of enzyme inhibitors in drug discovery: A guide for medicinal chemists and pharmacologists*; 2nd ed.; John Wiley & Sons, Inc.: Hoboken, NJ, 2013.
- (5) de Lucio, H.; Toro, M. A.; Camarasa, M. J.; Velázquez, S.; Gago, F.; Jiménez-Ruiz, A. Pseudoirreversible slow-binding inhibition of trypanothione reductase by a protein-protein interaction disruptor. *Br. J. Pharmacol.* **2020**, *177*, 5163-5176.
- (6) Klett, J.; Núñez-Salgado, A.; Dos Santos, H. G.; Cortés-Cabrera, A.; Perona, A.; Gil-Redondo, R.; Abia, D.; Gago, F.; Morreale, A. MM-ISMSA: An ultrafast and accurate scoring function for protein-protein docking. *J. Chem. Theory Comput.* **2012**, *8*, 3395-408.
- (7) Bond, C. S.; Zhang, Y.; Berriman, M.; Cunningham, M. L.; Fairlamb, A. H.; Hunter, W. N. Crystal structure of *Trypanosoma cruzi* trypanothione reductase in complex with trypanothione, and the structure-based discovery of new natural product inhibitors. *Structure.* **1999**, *7*, 81-89.
